# Supplementary material for: Identification of a sub-population of synovial mesenchymal stem cells with enhanced treatment efficacy in a rat model of osteoarthritis
Source: eLife. 2026 Jan 20;14:RP103332. doi: 10.7554/eLife.103332 (PMC12818869; doi:10.7554/eLife.103332)
Supplement: Supplementary file 7. [file elife-103332-supp7.xlsx]

## Sheet: Index
Supplementary Table 1 | Dimethyl (DM) labeled shotgun proteomics of proteins from messenchymal stem cells and non-messenchymal stem cells
Supplementary Table 2 |Tandem mass tag (TMT) labeled shotgun proteomics of proteins from messenchymal stem cells and non-messenchymal stem cells

## Sheet: Supplementary table 1
Supplementary File 7 |Shotgun proteomics of proteins from mesenchymal stem cells and non-mesenchymal stem cells identified without constraint by enzyme specificity rules during spectrum-to-sequence matching.
Proteins were identified from the the human UniProt protein database with appended standard laboratory and common contamination protein entries and reverse decoy sequences using the Andromeda algorithm as implemented in the MaxQuant software package v1.6.0.1, using an peptide FDR of 0.01. Search parameters included a mass tolerance of 1 ppm for the parent ion and 0.5 Da for the fragment ions, car…
Protein IDs	Majority protein IDs	Peptide counts (all)	Peptide counts (razor+unique)	Peptide counts (unique)	Protein names	Gene names	Mol. weight [kDa]	Sequence length	Sequence lengths	Q-value	Score	Ratio H/L	Ratio H/L normalized	Ratio H/L variability [%]	Ratio H/L 1	Ratio H/L 2	Ratio H/L 3	Ratio H/L normalized 1	Ratio H/L normalized 2	Ratio H/L normalized 3	Ratio H/L variability [%] 1	Ratio H/L variability [%] 2	Ratio H/L variability [%] 3	Intensity	Intensity L	Intensity H	Intensity 1	Intensity L 1	Intensity H 1	Intensity 2	Intensity L 2	Intensity H 2	Intensity 3	Intensity L 3	Intensity H 3
P04350	P04350	13	1	1	Tubulin beta-4A chain	TUBB4A	49.585	444	444	0.00079114	1.9849	0.036627	0.057022	60.038	NaN	NaN	NaN	NaN	NaN	NaN	NaN	NaN	NaN	1386600	1365200	21420	327080	322400	4687.2	700750	684020	16733	358810	358810	0
H9KVC7;A0A7P0T9I6;F8W8T1;P20591;A0A7P0Z4E0;A0A7P0T9R0;P20591-2;H9KVC9;H9KVD0;C9JEL4;P20592-2;P20592	H9KVC7;A0A7P0T9I6;F8W8T1;P20591;A0A7P0Z4E0;A0A7P0T9R0;P20591-2;H9KVC9	7;7;7;7;6;6;6;4;1;1;1;1	7;7;7;7;6;6;6;4;1;1;1;1	7;7;7;7;6;6;6;4;1;1;1;1	Interferon-induced GTP-binding protein Mx1;Interferon-induced GTP-binding protein Mx1, N-terminally processed	MX1	69.278	609	609;639;654;662;480;624;508;201;68;133;201;715	0	9.8763	0.058604	0.062991	12.262	NaN	NaN	0.058604	NaN	NaN	0.062991	NaN	NaN	12.262	8010000	7872000	138070	0	0	0	0	0	0	8010000	7872000	138070
CON__Q61726;A0A087X106;CON__O43790;CON__Q6NT21;CON__P78385;CON__Q14533;O43790;P78385;Q14533;CON__P78386;A6NCN2;P78386;F5GYI5;CON__Q9NSB4;Q9NSB4	CON__Q61726;A0A087X106;CON__O43790;CON__Q6NT21;CON__P78385;CON__Q14533;O43790;P78385;Q14533	5;4;4;4;4;4;4;4;4;2;2;2;1;1;1	4;3;3;3;3;3;3;3;3;1;2;1;1;1;1	4;3;3;3;3;3;3;3;3;1;2;1;1;1;1	Keratin, type II cuticular Hb6;Keratin, type II cuticular Hb3;Keratin, type II cuticular Hb1	KRT81;KRT86;KRT83	52.809	479	479;484;486;493;493;505;486;493;505;507;255;507;295;513;513	0	5.2844	0.077267	0.084444	81.83	NaN	NaN	0.077267	NaN	NaN	0.084444	NaN	NaN	81.83	27301000	25583000	1718300	0	0	0	0	0	0	27301000	25583000	1718300
F8VX58;F8VXZ8;F8VUF6;F8VWU0;P07585-4;P07585;A0A7I2PRI8;F8VNW0;F8VU58;F8VSI3;F8VNV6;P07585-5;P07585-3;P07585-2	F8VX58;F8VXZ8;F8VUF6;F8VWU0;P07585-4;P07585;A0A7I2PRI8;F8VNW0;F8VU58;F8VSI3;F8VNV6;P07585-5;P07585-3;P07585-2	2;2;2;2;2;2;1;1;1;1;1;1;1;1	2;2;2;2;2;2;1;1;1;1;1;1;1;1	2;2;2;2;2;2;1;1;1;1;1;1;1;1	Decorin	DCN	13.286	119	119;174;178;179;172;359;77;88;98;100;177;75;212;250	0.000777	1.8887	0.083193	0.1067	6.0481	NaN	NaN	NaN	NaN	NaN	NaN	NaN	NaN	NaN	1027200	884020	143210	279770	256880	22880	0	0	0	747470	627140	120330
O95810	O95810	5	5	5	Serum deprivation-response protein	SDPR	47.173	425	425	0	39.994	0.088745	0.12839	23.015	NaN	0.083843	0.10616	NaN	0.12839	0.11454	NaN	23.673	22.294	9140300	7186400	1953900	241670	241670	0	6015800	5365000	650780	2882900	1579800	1303100
E7EUE0;K7EJY1;Q7Z3S7-2;Q7Z3S7-4;Q7Z3S7-6;Q7Z3S7;Q7Z3S7-5	E7EUE0;K7EJY1;Q7Z3S7-2;Q7Z3S7-4;Q7Z3S7-6;Q7Z3S7;Q7Z3S7-5	1;1;1;1;1;1;1	1;1;1;1;1;1;1	1;1;1;1;1;1;1	Voltage-dependent calcium channel subunit alpha-2/delta-4;Voltage-dependent calcium channel subunit alpha-2-4;Voltage-dependent calcium channel subunit delta-4	CACNA2D4	68.025	601	601;1112;974;1073;1090;1137;1154	0	3.6885	0.070909	0.15584	23.723	NaN	NaN	NaN	NaN	NaN	NaN	NaN	NaN	NaN	23804000	22854000	949650	2401400	2267800	133600	13979000	13163000	816050	7423200	7423200	0
H0Y2X5;P47895;H0YNQ3;H0YKF9	H0Y2X5;P47895	4;4;1;1	4;4;1;1	4;4;1;1	Aldehyde dehydrogenase family 1 member A3	ALDH1A3	44.256	405	405;512;141;144	0	9.1533	0.10793	0.1713	79.218	NaN	NaN	NaN	NaN	NaN	NaN	NaN	NaN	NaN	3114800	2948000	166780	893760	756290	137460	2221100	2191800	29318	0	0	0
F8VW96;Q16527;F8VQR7	F8VW96;Q16527;F8VQR7	3;3;2	3;3;2	3;3;2	Cysteine and glycine-rich protein 2	CSRP2	26.736	243	243;193;187	0	4.6489	0.13463	0.19846	81.482	NaN	0.13463	NaN	NaN	0.19846	NaN	NaN	81.482	NaN	3391000	3242200	148760	0	0	0	3391000	3242200	148760	0	0	0
O75094-3;O75094;O75094-4;O75094-2;A0A0A0MSC8	O75094-3;O75094;O75094-4;O75094-2;A0A0A0MSC8	6;6;6;5;4	6;6;6;5;4	6;6;6;5;4	Slit homolog 3 protein	SLIT3	162.16	1472	1472;1523;1530;1423;1393	0	8.3547	0.10416	0.20922	162.9	0.10416	NaN	NaN	0.20922	NaN	NaN	162.9	NaN	NaN	6936200	5601200	1335000	6936200	5601200	1335000	0	0	0	0	0	0
P42285	P42285	2	2	1	Superkiller viralicidic activity 2-like 2	SKIV2L2	117.8	1042	1042	1	-2	0.1044	0.22739	34.871	NaN	NaN	NaN	NaN	NaN	NaN	NaN	NaN	NaN	11369000	11077000	292010	5032300	4883300	148980	6337100	6194100	143030	0	0	0
A0A7P0T855;O14879;A0A7P0T7D6	A0A7P0T855;O14879;A0A7P0T7D6	5;5;4	5;5;4	5;5;4	Interferon-induced protein with tetratricopeptide repeats 3	IFIT3	59.303	517	517;490;438	0	9.8246	0.2407	0.25646	149.55	NaN	NaN	0.12159	NaN	NaN	0.12858	NaN	NaN	97.643	6635900	5886700	749240	0	0	0	1003800	669550	334270	5632100	5217100	414970
F8W7T0;Q9UGI8-2;Q9UGI8	F8W7T0;Q9UGI8-2;Q9UGI8	2;2;2	2;2;2	2;2;2	Testin	TES	8.9703	79	79;412;421	0.00079808	2.0358	0.1555	0.2591	8.3108	NaN	0.1555	NaN	NaN	0.2591	NaN	NaN	8.3108	NaN	3739100	3257300	481790	0	0	0	3739100	3257300	481790	0	0	0
Q8TCJ2	Q8TCJ2	2	2	2	Dolichyl-diphosphooligosaccharide--protein glycosyltransferase subunit STT3B	STT3B	93.673	826	826	0.0088552	1.1461	0.24855	0.26637	128.34	NaN	NaN	0.24855	NaN	NaN	0.26637	NaN	NaN	128.34	1503000	1141400	361570	0	0	0	0	0	0	1503000	1141400	361570
G3V1D1;G3V192;P02794	G3V1D1;G3V192;P02794	2;2;2	2;2;2	2;2;2	Ferritin;Ferritin heavy chain;Ferritin heavy chain, N-terminally processed	FTH1	12.876	113	113;153;183	0	3.9709	0.16719	0.27052	16.18	NaN	0.16719	NaN	NaN	0.27052	NaN	NaN	16.18	NaN	6867300	5844500	1022800	0	0	0	6867300	5844500	1022800	0	0	0
P07305-2;P07305	P07305-2;P07305	2;2	2;2	2;2	Histone H1.0;Histone H1.0, N-terminally processed	H1F0	19.167	177	177;194	0.0008285	2.2297	0.17522	0.27803	12.334	NaN	0.17522	NaN	NaN	0.27803	NaN	NaN	12.334	NaN	2855900	2294500	561450	0	0	0	2855900	2294500	561450	0	0	0
CON__P08727;P08727;K7EMS3;C9JM50	CON__P08727;P08727	7;7;2;2	6;6;2;1	6;6;2;1	Keratin, type I cytoskeletal 19	KRT19	44.091	400	400;400;181;196	0	13.325	0.17681	0.28527	70.94	NaN	0.17681	NaN	NaN	0.28527	NaN	NaN	70.94	NaN	13714000	9723700	3990200	0	0	0	12396000	9723700	2672000	1318200	0	1318200
Q9HAV7	Q9HAV7	2	2	2	GrpE protein homolog 1, mitochondrial	GRPEL1	24.279	217	217	0.00080972	2.1446	1.2963	0.29045	95.899	NaN	NaN	0.58643	NaN	NaN	0.62885	NaN	NaN	120.06	2773600	1464900	1308700	623170	544010	79156	350360	0	350360	1800100	920860	879210
P98095;P98095-2	P98095;P98095-2	5;5	5;5	5;5	Fibulin-2	FBLN2	126.57	1184	1184;1231	0	13.011	0.11087	0.32341	102.49	0.094126	NaN	NaN	0.22441	NaN	NaN	74.526	NaN	NaN	10442000	9544100	897790	9380100	8752400	627640	1061800	791650	270150	0	0	0
Q5SS57;A0A140T951;P01889;A0A140TA21;A0A140T9D4;S6AU73;Q2L6G2;D5H3J5;A0A140TA02;A0A140T9H3;A0A140T9A9;F6U0H7;A0A1W2PNR7	Q5SS57;A0A140T951;P01889;A0A140TA21;A0A140T9D4;S6AU73;Q2L6G2;D5H3J5	5;4;4;3;3;3;3;3;2;2;2;2;2	3;2;3;2;2;1;2;2;1;1;1;2;1	1;1;1;0;0;0;1;1;0;1;1;0;0	HLA class I histocompatibility antigen, B-7 alpha chain	HLA-B	40.33	362	362;241;362;224;246;362;362;362;224;241;241;246;253	0	3.0059	0.24897	0.33088	27.976	NaN	NaN	NaN	NaN	NaN	NaN	NaN	NaN	NaN	4167100	3169400	997680	244710	244710	0	2072000	1600100	471840	1850400	1324600	525840
R4GN98;P06703	R4GN98;P06703	3;3	3;3	3;3	Protein S100;Protein S100-A6	S100A6	9.681	85	85;90	0	4.1697	0.21023	0.34438	18.308	0.25022	0.19791	0.43106	0.61598	0.25649	0.38565	25.222	15.625	16.006	501270000	385430000	115840000	61979000	48563000	13416000	243520000	203160000	40357000	195780000	133710000	62066000
E7EX53;A0A2R8Y738;A0A2R8YEM3;E7EQV9;E7ENU7;P61313	E7EX53;A0A2R8Y738;A0A2R8YEM3;E7EQV9;E7ENU7;P61313	1;1;1;1;1;1	1;1;1;1;1;1	1;1;1;1;1;1	Ribosomal protein L15;60S ribosomal protein L15	RPL15	15.722	133	133;138;169;174;175;204	0	6.1845	0.19274	0.3484	84.631	NaN	NaN	NaN	NaN	NaN	NaN	NaN	NaN	NaN	3173400	2147700	1025700	1110200	856150	254000	2063200	1291500	771700	0	0	0
H0Y524;F2Z2V0;B0QZ18;Q99829	H0Y524;F2Z2V0;B0QZ18;Q99829	1;1;1;1	1;1;1;1	1;1;1;1	Copine-1	CPNE1	21.346	208	208;533;542;537	0.0067476	1.3546	0.20994	0.34951	38.549	NaN	NaN	NaN	NaN	NaN	NaN	NaN	NaN	NaN	1362000	1150900	211170	781080	616060	165020	580970	534820	46146	0	0	0
Q96CX2;Q6ZWB6	Q96CX2	6;1	6;1	6;1	BTB/POZ domain-containing protein KCTD12	KCTD12	35.7	325	325;473	0	25.942	0.17075	0.35004	47.252	0.11383	0.2946	0.20859	0.21733	0.43114	0.21722	43.448	23.562	67.477	9860900	8544000	1317000	6911700	6197600	714160	1688600	1317500	371060	1260600	1028900	231750
Q16647	Q16647	11	11	11	Prostacyclin synthase	PTGIS	57.103	500	500	0	111.99	0.18107	0.35431	28.989	0.17588	0.19619	0.14689	0.44237	0.3452	0.15638	17.555	65.315	13.496	186510000	156220000	30289000	61692000	51823000	9869100	99637000	83182000	16455000	25181000	21216000	3964600
H3BPU7;H3BPM5;H3BN01;H3BQX0;H3BNY8;H3BT46;B4DYB8;H3BMZ9;H3BPP3;H3BP57;H3BT48;H3BUZ9;F5GX71;H3BPB8;P34949-2;P34949	H3BPU7;H3BPM5;H3BN01;H3BQX0;H3BNY8;H3BT46;B4DYB8;H3BMZ9;H3BPP3;H3BP57;H3BT48;H3BUZ9;F5GX71;H3BPB8;P34949-2;P34949	1;1;1;1;1;1;1;1;1;1;1;1;1;1;1;1	1;1;1;1;1;1;1;1;1;1;1;1;1;1;1;1	1;1;1;1;1;1;1;1;1;1;1;1;1;1;1;1	Mannose-6-phosphate isomerase	MPI	13.228	119	119;173;174;175;185;213;228;264;287;288;319;339;373;403;362;423	0.0073431	1.3207	0.23492	0.36	44.061	NaN	NaN	NaN	NaN	NaN	NaN	NaN	NaN	NaN	686460	547090	139380	295590	256340	39243	390870	290740	100130	0	0	0
P11047	P11047	12	12	12	Laminin subunit gamma-1	LAMC1	177.6	1609	1609	0	74.444	0.18468	0.36039	116.3	0.1364	NaN	NaN	0.26828	NaN	NaN	63.883	NaN	NaN	9438900	7510800	1928000	7519700	6914300	605420	937870	289550	648320	981290	306980	674310
O00151	O00151	3	3	3	PDZ and LIM domain protein 1	PDLIM1	36.071	329	329	0	4.5372	0.23784	0.36836	46.759	NaN	0.23784	NaN	NaN	0.36836	NaN	NaN	46.759	NaN	3237400	2528100	709280	0	0	0	3237400	2528100	709280	0	0	0
U3KQK0;Q99880;Q99879;Q99877;Q93079;Q5QNW6;P62807;P58876;P57053;O60814;Q5QNW6-2;Q96A08;A0A2R8Y619	U3KQK0;Q99880;Q99879;Q99877;Q93079;Q5QNW6;P62807;P58876;P57053;O60814;Q5QNW6-2;Q96A08	7;7;7;7;7;7;7;7;7;7;7;4;2	7;7;7;7;7;7;7;7;7;7;7;4;2	2;2;2;2;2;2;2;2;2;2;2;0;0	Histone H2B;Histone H2B type 1-L;Histone H2B type 1-M;Histone H2B type 1-N;Histone H2B type 1-H;Histone H2B type 2-F;Histone H2B type 1-C/E/F/G/I;Histone H2B type 1-D;Histone H2B type F-S;Histone H2B type 1-K;Histone H2B type 1-A	HIST1H2BN;HIST1H2BL;HIST1H2BM;HIST1H2BH;HIST2H2BF;HIST1H2BC;HIST1H2BD;H2BFS;HIST1H2BK;HIST1H2BA	18.804	166	166;126;126;126;126;126;126;126;126;126;134;127;122	0	31.633	0.32346	0.37847	40.779	0.42957	0.2655	0.35929	1.1071	0.35065	0.38088	28.99	59.264	50.224	1732300000	1335600000	396690000	894080000	678340000	215740000	505280000	411250000	94026000	332910000	246000000	86917000
A0A1W2PS52;P04080	A0A1W2PS52;P04080	1;1	1;1	1;1	Cystatin-B	CSTB	9.0182	83	83;98	0.0079051	1.2714	0.21826	0.38097	94.098	NaN	NaN	NaN	NaN	NaN	NaN	NaN	NaN	NaN	5690900	4941600	749350	643920	418900	225020	5047000	4522700	524330	0	0	0
P16403;P10412;P16402;Q02539;P22492	P16403;P10412;P16402	7;6;6;3;2	7;6;6;3;2	4;4;4;1;1	Histone H1.2;Histone H1.4;Histone H1.3	HIST1H1C;HIST1H1E;HIST1H1D	21.364	213	213;219;221;215;207	0	7.2762	0.3258	0.38265	40.925	NaN	0.14865	0.4487	NaN	0.25547	0.44972	NaN	2.268	25.83	112580000	92509000	20070000	5821800	4002100	1819700	79259000	69282000	9976800	27498000	19225000	8273200
A0A7I2V2R5;A0A7I2V2X8;P27487;A0A7I2V5R8;A0A7I2V2I2;A0A7I2V3F5;F8WBB6;F8WE17	A0A7I2V2R5;A0A7I2V2X8;P27487;A0A7I2V5R8	9;9;9;6;3;1;1;1	9;9;9;6;3;1;1;1	9;9;9;6;3;1;1;1	Dipeptidyl peptidase 4;Dipeptidyl peptidase 4 membrane form;Dipeptidyl peptidase 4 soluble form	DPP4	84.505	734	734;765;766;474;296;117;118;170	0	15.539	0.24237	0.38404	15.106	NaN	0.24237	0.29004	NaN	0.4219	0.31496	NaN	15.166	31.684	38358000	29457000	8901200	0	0	0	28957000	22241000	6716300	9400600	7215700	2184900
E9PBF6;P20700;A0A0D9SFY5;A0A0D9SFE5	E9PBF6;P20700	3;3;1;1	2;2;1;1	2;2;1;1	Lamin-B1	LMNB1	44.643	387	387;586;166;329	0.0014771	1.6797	0.25932	0.38643	3.5498	NaN	0.25932	NaN	NaN	0.38643	NaN	NaN	3.5498	NaN	2053500	1530800	522660	0	0	0	2053500	1530800	522660	0	0	0
A0A0D9SEN1;Q12884;B4DLR2;F8WF29;C9J131;Q12884-2	A0A0D9SEN1;Q12884;B4DLR2	3;3;2;1;1;1	3;3;2;1;1;1	3;3;2;1;1;1	Prolyl endopeptidase FAP;Antiplasmin-cleaving enzyme FAP, soluble form	FAP	87.583	759	759;760;735;121;155;239	0	29.603	0.24906	0.38825	42.03	NaN	0.24906	NaN	NaN	0.38825	NaN	NaN	42.03	NaN	5764300	4022400	1741900	0	0	0	5764300	4022400	1741900	0	0	0
CON__Q3KNV1;P08729;CON__P08729;CON__Q9DCV7;A0A1W2PRP1	CON__Q3KNV1;P08729;CON__P08729	17;17;16;6;5	14;14;13;3;5	10;10;9;2;4	Keratin, type II cytoskeletal 7	KRT7	51.385	469	469;469;469;457;132	0	39.141	0.23515	0.39237	35.663	NaN	0.24412	8.0301	NaN	0.3974	8.5942	NaN	6.7	176.95	82694000	31100000	51594000	0	0	0	25693000	19974000	5719100	57001000	11126000	45875000
A0A3B3IRX2;P14555	A0A3B3IRX2;P14555	4;4	4;4	4;4	Phospholipase A2, membrane associated	PLA2G2A	13.037	117	117;144	0	4.0921	0.38686	0.4018	106.08	NaN	0.045565	0.54132	NaN	0.079087	0.53666	NaN	36.657	24.173	63925000	46569000	17356000	0	0	0	24306000	23290000	1016400	39619000	23279000	16340000
K7EMV3;A0A590UJJ6;B4DEB1;K7EK07;K7ES00;Q71DI3;Q16695;P84243;P68431;K7EP01;Q5TEC6;Q6NXT2	K7EMV3;A0A590UJJ6;B4DEB1;K7EK07;K7ES00;Q71DI3;Q16695;P84243;P68431	3;3;3;3;3;3;3;3;3;1;1;1	3;3;3;3;3;3;3;3;3;1;1;1	3;3;3;3;3;3;3;3;3;1;1;1	Histone H3;Histone H3.2;Histone H3.1t;Histone H3.3;Histone H3.1	H3F3B;H3F3A;HIST2H3A;HIST3H3;HIST1H3A	10.334	92	92;120;123;132;151;136;136;136;136;113;136;135	0	28.901	0.31358	0.40401	114.75	NaN	0.24906	NaN	NaN	0.50561	NaN	NaN	138.6	NaN	135740000	106760000	28973000	0	0	0	87794000	69663000	18131000	47941000	37099000	10842000
Q02952;Q02952-3;Q02952-2	Q02952;Q02952-3;Q02952-2	66;64;64	66;64;64	66;64;64	A-kinase anchor protein 12	AKAP12	191.48	1782	1782;1677;1684	0	323.31	0.30798	0.41084	38.571	0.062347	0.38472	0.28338	0.15723	0.64413	0.30487	30.546	28.969	16.138	882670000	712210000	170460000	301950000	278920000	23031000	196440000	133990000	62454000	384270000	299300000	84974000
O60443-3;O60443;H7C147;C9JSR4;H7BZJ0;O60443-2	O60443-3;O60443;H7C147;C9JSR4	3;3;2;2;1;1	3;3;2;2;1;1	3;3;2;2;1;1	Non-syndromic hearing impairment protein 5	DFNA5	36.042	332	332;496;192;356;155;101	0	11.19	0.25811	0.42845	37.76	0.33592	0.25811	NaN	0.61537	0.37957	NaN	43.132	9.0632	NaN	2779700	2075100	704550	1004000	766000	237970	1775700	1309100	466570	0	0	0
F5GZP6;Q86W92-3;Q86W92-4;Q86W92-2;Q86W92;H0YFE4;A0A0A0MTP2	F5GZP6;Q86W92-3;Q86W92-4;Q86W92-2;Q86W92;H0YFE4;A0A0A0MTP2	2;2;2;2;2;1;1	2;2;2;2;2;1;1	2;2;2;2;2;1;1	Liprin-beta-1	PPFIBP1	84.071	744	744;858;980;1005;1011;242;281	0.00080064	2.0532	0.30009	0.43041	30.218	NaN	0.25898	NaN	NaN	0.34342	NaN	NaN	31.927	NaN	960640	743920	216720	267710	198180	69528	692930	545740	147190	0	0	0
B7Z7Q6;E9PNF7;P42785;P42785-2;E9PL49;B3KR26;E9PQB5;E9PL85;E9PNJ1;E9PKN6;A0A7P0Z451;E9PLY4;A0A7P0TB23	B7Z7Q6;E9PNF7;P42785;P42785-2;E9PL49;B3KR26;E9PQB5;E9PL85;E9PNJ1;E9PKN6;A0A7P0Z451;E9PLY4;A0A7P0TB23	2;2;2;2;1;1;1;1;1;1;1;1;1	2;2;2;2;1;1;1;1;1;1;1;1;1	2;2;2;2;1;1;1;1;1;1;1;1;1	Lysosomal Pro-X carboxypeptidase	PRCP	43.933	391	391;442;496;517;43;128;145;147;163;192;292;325;332	0.00083126	2.2423	0.26892	0.43198	60.371	NaN	0.2447	NaN	NaN	0.35797	NaN	NaN	26.579	NaN	4392200	3331000	1061200	0	0	0	3582100	2876400	705670	810080	454590	355490
Q92629-3;Q92629;Q92629-2;E5RI34	Q92629-3;Q92629;Q92629-2;E5RI34	2;2;2;1	2;2;2;1	2;2;2;1	Delta-sarcoglycan	SGCD	28.75	256	256;289;290;82	0	2.5245	0.29448	0.43245	15.673	NaN	0.27151	NaN	NaN	0.43027	NaN	NaN	11.456	NaN	5243700	3971800	1271900	906710	679910	226800	2932300	2287600	644740	1404700	1004400	400330
P26447	P26447	4	4	4	Protein S100-A4	S100A4	11.728	101	101	0	11.604	0.25687	0.44668	15.735	0.1792	0.25914	0.4546	0.43825	0.49811	0.43721	27.477	4.5868	8.5855	244300000	187980000	56318000	65705000	55891000	9813900	80458000	63775000	16683000	98134000	68313000	29821000
P30740	P30740	1	1	1	Leukocyte elastase inhibitor	SERPINB1	42.741	379	379	0.0079787	1.3094	0.37132	0.4516	28.339	NaN	NaN	NaN	NaN	NaN	NaN	NaN	NaN	NaN	1283300	925080	358260	0	0	0	642510	483240	159270	640830	441840	198990
P62805	P62805	7	7	7	Histone H4	HIST1H4A	11.367	103	103	0	119.34	0.40179	0.46767	33.974	0.5013	0.2805	0.39691	1.2483	0.54519	0.40686	66.151	35.921	10.128	645880000	471860000	174020000	106310000	71739000	34566000	286670000	220860000	65812000	252910000	179270000	73638000
A0A3B3IRV3;Q9ULC4-2;Q9ULC4;Q9ULC4-3	A0A3B3IRV3;Q9ULC4-2;Q9ULC4;Q9ULC4-3	1;1;1;1	1;1;1;1	1;1;1;1	Malignant T-cell-amplified sequence 1	MCTS1	20.343	181	181;169;181;182	0	2.3238	0.36177	0.46779	12.211	NaN	0.36177	NaN	NaN	0.46779	NaN	NaN	12.211	NaN	885000	731010	153990	0	0	0	885000	731010	153990	0	0	0
Q08380	Q08380	1	1	1	Galectin-3-binding protein	LGALS3BP	65.33	585	585	0.00080645	2.0859	0.30927	0.46844	81.176	NaN	NaN	NaN	NaN	NaN	NaN	NaN	NaN	NaN	2226400	1459800	766670	424190	344230	79952	933200	731190	202000	869060	384350	484710
A0A0A0MSS8;P42330;S4R3Z2;P42330-2;A6NHU4;P17516;S4R3D5	A0A0A0MSS8;P42330;S4R3Z2;P42330-2	5;5;4;3;2;2;1	2;2;1;1;0;0;0	2;2;1;1;0;0;0	Aldo-keto reductase family 1 member C3	AKR1C3	36.867	323	323;323;300;204;205;323;155	0	5.7344	0.27634	0.46997	47.666	NaN	0.39849	NaN	NaN	0.60685	NaN	NaN	11.516	NaN	5609400	4725200	884150	746340	660280	86063	2353400	1748400	605020	2509600	2316500	193060
P51178;P51178-2	P51178;P51178-2	2;1	2;1	2;1	1-phosphatidylinositol 4,5-bisphosphate phosphodiesterase delta-1	PLCD1	85.664	756	756;777	0.00082919	2.2339	0.4351	0.4723	36.259	NaN	NaN	NaN	NaN	NaN	NaN	NaN	NaN	NaN	2626300	1764400	861960	610400	491370	119030	1525800	948080	577730	490110	324920	165190
A0A3B3ISS6;Q14956-2;Q14956	A0A3B3ISS6;Q14956-2;Q14956	1;1;1	1;1;1	1;1;1	Transmembrane glycoprotein NMB	GPNMB	65.941	588	588;560;572	0.0079156	1.2778	0.43566	0.47241	146.13	NaN	NaN	NaN	NaN	NaN	NaN	NaN	NaN	NaN	19836000	14052000	5783800	3380800	1224400	2156500	11570000	9614000	1955800	4885700	3214100	1671600
P08648	P08648	5	5	5	Integrin alpha-5;Integrin alpha-5 heavy chain;Integrin alpha-5 light chain	ITGA5	114.54	1049	1049	0	17.392	0.29883	0.47464	32.061	0.27117	0.41535	NaN	0.42213	0.62231	NaN	16.58	48.045	NaN	3871300	2694600	1176600	799650	674540	125110	1830000	1200500	629420	1241700	819550	422100
Q5SSJ5;B0QZK9;B0QZK8;B0QZK4;Q5SWC8;Q5SSJ5-5;Q5SSJ5-3;Q5SSJ5-2	Q5SSJ5;B0QZK9;B0QZK8;B0QZK4;Q5SWC8;Q5SSJ5-5;Q5SSJ5-3;Q5SSJ5-2	2;1;1;1;1;1;1;1	2;1;1;1;1;1;1;1	2;1;1;1;1;1;1;1	Heterochromatin protein 1-binding protein 3	HP1BP3	61.206	553	553;75;124;253;278;133;401;515	0	7.2917	0.27539	0.47641	42.606	NaN	NaN	NaN	NaN	NaN	NaN	NaN	NaN	NaN	2337700	1805600	532100	945890	725980	219910	1391800	1079600	312190	0	0	0
Q15847;Q5TBU2	Q15847	3;1	3;1	3;1	Adipogenesis regulatory factor	ADIRF	7.8547	76	76;38	0	107.49	0.25235	0.48656	37.524	0.2507	0.19754	0.72043	0.67355	0.34557	0.74619	47.525	13.366	17.076	76293000	50664000	25629000	8165200	6401500	1763600	27713000	22262000	5451000	40415000	22000000	18414000
D6RFH4;H3BUX2;O43169	D6RFH4;H3BUX2;O43169	1;1;1	1;1;1	1;1;1	Cytochrome b5 type B	CYB5B	15.208	135	135;144;150	0	18.854	0.25356	0.48657	155.87	NaN	NaN	NaN	NaN	NaN	NaN	NaN	NaN	NaN	3466200	2590600	875550	1512300	1458300	54015	1953900	1132300	821530	0	0	0
Q5T6L6;P00966;Q5T6L5	Q5T6L6;P00966;Q5T6L5	2;2;1	2;2;1	2;2;1	Argininosuccinate synthase	ASS1	22.411	198	198;412;179	0	6.8	0.32416	0.48747	125.83	NaN	0.30991	NaN	NaN	0.47321	NaN	NaN	4.1965	NaN	3116600	1916900	1199700	0	0	0	2375600	1732800	642780	740960	184080	556880
F5H0C8;P09104;P09104-2;F5H1C3;P13929-3;P13929-2;P13929;U3KQP4;U3KQQ1	F5H0C8;P09104;P09104-2;F5H1C3;P13929-3;P13929-2;P13929	6;6;5;3;3;3;3;2;1	4;4;3;2;1;1;1;1;1	4;4;3;2;1;1;1;1;1	Enolase;Gamma-enolase;Beta-enolase	ENO2;ENO3	34.762	315	315;434;391;103;391;406;434;73;86	0	10.922	0.2701	0.48934	119.73	0.15746	0.20951	1.1007	0.38244	0.34898	1.1228	100.7	92.032	162.78	86038000	59928000	26110000	15226000	12215000	3010300	38509000	32344000	6165800	32303000	15369000	16934000
Q14314	Q14314	4	4	4	Fibroleukin	FGL2	50.228	439	439	0	3.264	0.3284	0.49322	10.276	NaN	0.3284	NaN	NaN	0.49322	NaN	NaN	10.276	NaN	4779600	3688200	1091400	0	0	0	4779600	3688200	1091400	0	0	0
O14684	O14684	1	1	1	Prostaglandin E synthase	PTGES	17.102	152	152	0.0047587	1.3769	0.36864	0.49418	73.425	NaN	NaN	NaN	NaN	NaN	NaN	NaN	NaN	NaN	13460000	10213000	3246500	0	0	0	3563600	2196900	1366700	9896000	8016200	1879800
P60903	P60903	3	3	3	Protein S100-A10	S100A10	11.203	97	97	0	16.453	0.32428	0.49875	53.057	0.18671	0.335	NaN	0.47175	0.51827	NaN	22.977	118.21	NaN	323580000	236870000	86716000	118630000	98576000	20055000	115010000	80887000	34120000	89945000	57405000	32540000
CON__Q3MHN2	CON__Q3MHN2	2	2	2			61.998	548	548	0	8.5595	0.30912	0.49958	61.75	NaN	NaN	NaN	NaN	NaN	NaN	NaN	NaN	NaN	10903000	8329200	2574000	1506400	1065600	440730	2778000	2097400	680650	6618800	5166100	1452700
CON__Q86YZ3;Q86YZ3	CON__Q86YZ3;Q86YZ3	3;3	3;3	3;3	Hornerin	HRNR	282.39	2850	2850;2850	0	7.1801	0.32124	0.49993	56.099	0.32435	0.22482	NaN	0.65149	0.30106	NaN	55.6	46.538	NaN	11052000	8550400	2502000	3885700	2993800	891890	6935300	5437900	1497400	231420	118720	112700
H3BP42;Q9ULZ3-2;Q9ULZ3	H3BP42;Q9ULZ3-2;Q9ULZ3	1;1;1	1;1;1	1;1;1	Apoptosis-associated speck-like protein containing a CARD	PYCARD	13.52	125	125;176;195	0	5.0116	0.34183	0.50504	2.051	NaN	NaN	NaN	NaN	NaN	NaN	NaN	NaN	NaN	659960	523930	136030	298850	250160	48695	361110	273770	87340	0	0	0
E7EPT4;P19404	E7EPT4;P19404	1;1	1;1	1;1	NADH dehydrogenase [ubiquinone] flavoprotein 2, mitochondrial	NDUFV2	27.907	252	252;249	0.00080906	2.1324	0.42671	0.50731	79.911	NaN	NaN	0.65426	NaN	NaN	0.70002	NaN	NaN	102.68	1511600	957240	554390	170680	122420	48257	311440	246710	64727	1029500	588110	441410
O75131;H0YB26;E7ENV7;Q86YQ8-2;Q9HCH3-2;Q96FN4-2;Q96FN4;Q8IYJ1;Q96A23;O95741;Q9UBL6-2;Q86YQ8;Q96A23-2;Q9HCH3;O95741-2;Q9UBL6	O75131	3;1;1;1;1;1;1;1;1;1;1;1;1;1;1;1	3;1;1;1;1;1;1;1;1;1;1;1;1;1;1;1	3;1;1;1;1;1;1;1;1;1;1;1;1;1;1;1	Copine-3	CPNE3	60.13	537	537;262;552;233;301;446;548;553;557;557;558;564;575;593;612;633	0	5.4187	0.39243	0.50872	55.05	0.14571	0.33939	0.56218	0.28331	0.54811	0.58948	34.721	66.585	18.859	12069000	7804800	4264100	1686900	1319900	366930	4279200	2930400	1348800	6102800	3554400	2548400
Q9HCU0	Q9HCU0	2	2	2	Endosialin	CD248	80.858	757	757	0	5.0043	0.48517	0.51809	57.846	NaN	NaN	0.40897	NaN	NaN	0.44368	NaN	NaN	21.929	4315500	3066300	1249200	0	0	0	613930	377080	236850	3701600	2689200	1012400
A0A087WXX8;A0A087WWT1;P21912	A0A087WXX8;A0A087WWT1;P21912	2;2;2	2;2;2	2;2;2	Succinate dehydrogenase [ubiquinone] iron-sulfur subunit, mitochondrial	SDHB	14.143	123	123;200;280	0	5.5385	0.28855	0.51929	8.924	0.23776	0.35019	NaN	0.50968	0.52909	NaN	12.63	5.2184	NaN	5592400	4036600	1555700	2200400	1722800	477560	1937600	1390000	547620	1454400	923840	530560
Q7Z5R6	Q7Z5R6	2	2	2	Amyloid beta A4 precursor protein-binding family B member 1-interacting protein	APBB1IP	73.182	666	666	0	4.197	0.41168	0.52555	95.231	NaN	0.58062	2.7374	NaN	0.95968	2.838	NaN	14.202	135.47	20479000	10715000	9763200	411930	314030	97901	9532300	5507100	4025300	10534000	4894400	5640000
E9PIM6;E9PNQ8;P04216;J3QRJ3	E9PIM6;E9PNQ8;P04216;J3QRJ3	3;3;3;2	3;3;3;2	3;3;3;2	Thy-1 membrane glycoprotein	THY1	16.927	152	152;165;161;144	0	12.135	0.31011	0.53678	68.185	0.17876	0.31011	1.2047	0.46337	0.53678	1.2829	9.6404	84.888	32.057	32439000	23187000	9252100	12572000	10605000	1967300	8939000	6924500	2014500	10928000	5657900	5270300
C9JFR7;P99999;CON__P62894	C9JFR7;P99999;CON__P62894	2;2;1	2;2;1	2;2;1	Cytochrome c	CYCS	11.333	101	101;105;105	0	3.0912	0.21192	0.53777	50.402	0.20143	NaN	NaN	0.50612	NaN	NaN	8.5787	NaN	NaN	4922000	3519300	1402700	3774500	2967500	807000	1147500	551800	595690	0	0	0
A0A5F9ZHJ7;A0A5F9ZHL1;P24752;A0A5F9ZHH9;P24752-2;A0A5F9ZHL7;H0YEL7;E9PRQ6;A0A5F9ZHJ0;A0A5F9ZHD4;A0A5F9ZI66	A0A5F9ZHJ7;A0A5F9ZHL1;P24752;A0A5F9ZHH9;P24752-2;A0A5F9ZHL7;H0YEL7;E9PRQ6;A0A5F9ZHJ0	4;4;4;3;3;2;2;2;2;1;1	4;4;4;3;3;2;2;2;2;1;1	4;4;4;3;3;2;2;2;2;1;1	Acetyl-CoA acetyltransferase, mitochondrial	ACAT1	33.504	315	315;434;427;197;162;106;136;141;337;306;322	0	13.839	0.38369	0.54153	29.277	NaN	0.65139	NaN	NaN	1.0449	NaN	NaN	39.945	NaN	5257500	3895200	1362400	1388300	1159600	228690	2473400	1527300	946060	1395800	1208200	187620
Q8NDI1-3;Q8NDI1-2;Q8NDI1;B5MC86	Q8NDI1-3;Q8NDI1-2;Q8NDI1	3;3;3;1	3;3;3;1	3;3;3;1	EH domain-binding protein 1	EHBP1	132.32	1160	1160;1196;1231;310	0	3.4021	0.42391	0.54435	47.013	NaN	0.42391	NaN	NaN	0.54435	NaN	NaN	49.918	NaN	1825300	1093900	731340	304500	249760	54740	832160	584560	247600	688620	259620	429000
Q13228-3;Q13228;Q13228-4;H0Y532;Q13228-2;C9JVL0;F2Z2W8;F8WCR4;A6PVX1	Q13228-3;Q13228;Q13228-4;H0Y532;Q13228-2	3;3;3;2;2;1;1;1;1	3;3;3;2;2;1;1;1;1	3;3;3;2;2;1;1;1;1	Selenium-binding protein 1	SELENBP1	45.468	410	410;472;514;305;408;80;123;165;295	0	4.5687	0.45027	0.54533	31.144	0.3427	0.14298	0.49566	0.64253	0.23242	0.53164	7.9497	166.48	27.548	12297000	10492000	1804200	1253900	910910	343020	8628700	7948500	680270	2414000	1633100	780920
F2Z2Y4;O00764-2;O00764;O00764-3	F2Z2Y4;O00764-2;O00764;O00764-3	2;2;2;1	2;2;2;1	2;2;2;1	Pyridoxal kinase	PDXK	30.638	272	272;284;312;239	0	2.7285	0.36191	0.54668	23.414	NaN	NaN	NaN	NaN	NaN	NaN	NaN	NaN	NaN	2496900	1677700	819220	682020	530040	151980	962400	665450	296950	852470	482180	370290
Q08211	Q08211	3	3	3	ATP-dependent RNA helicase A	DHX9	140.96	1270	1270	0	8.9295	0.4567	0.54783	6.2352	NaN	0.44362	NaN	NaN	0.57065	NaN	NaN	6.0955	NaN	3825400	2759600	1065800	0	0	0	2543900	1918500	625380	1281600	841120	440440
D6R9P2;Q9BUT1-3;Q9BUT1	D6R9P2;Q9BUT1-3;Q9BUT1	1;1;1	1;1;1	1;1;1	3-hydroxybutyrate dehydrogenase type 2	SLC9B2;BDH2	12.375	112	112;144;245	0.002907	1.6253	0.32945	0.54833	29.053	NaN	NaN	NaN	NaN	NaN	NaN	NaN	NaN	NaN	1932700	1200600	732050	479290	277360	201930	1453400	923260	530120	0	0	0
Q9ULC3	Q9ULC3	5	5	5	Ras-related protein Rab-23	RAB23	26.659	237	237	0	21.754	0.31563	0.54882	41.797	NaN	0.30406	0.83364	NaN	0.51037	0.88055	NaN	32.229	9.0246	7306300	5149700	2156600	371890	297090	74802	4488000	3433700	1054300	2446400	1418900	1027500
O94760;B4DYP1;O94760-2	O94760;B4DYP1;O94760-2	4;3;3	4;3;3	4;3;3	N(G),N(G)-dimethylarginine dimethylaminohydrolase 1	DDAH1	31.121	285	285;185;182	0	6.1243	0.38008	0.55549	41.072	0.24732	0.4696	NaN	0.48736	0.77386	NaN	31.133	39.223	NaN	11556000	7287000	4268700	2002100	1511100	490940	7037200	4685800	2351400	2516500	1090100	1426400
O95816;O95816-2	O95816;O95816-2	4;3	4;3	4;3	BAG family molecular chaperone regulator 2	BAG2	23.772	211	211;178	0	3.3526	0.31145	0.5574	11.096	0.26338	0.33693	NaN	0.5575	0.53968	NaN	0.026286	15.546	NaN	8659900	6291800	2368100	2740100	2071400	668640	5919900	4220400	1699500	0	0	0
A6NCQ0;A6NJU6;A6NFX8;Q9UKK9;C9JYY9;H0YEY4	A6NCQ0;A6NJU6;A6NFX8;Q9UKK9;C9JYY9	3;3;3;3;2;1	3;3;3;3;2;1	3;3;3;3;2;1	ADP-sugar pyrophosphatase	NUDT5	19.961	180	180;186;232;219;97;137	0	13.683	0.36391	0.55923	11.902	0.31134	0.36924	0.31785	0.63388	0.59795	0.33772	18.736	15.353	53.411	7549400	5294300	2255100	1574800	1106300	468540	2950300	2107400	842900	3024300	2080700	943660
A0A7I2V2Q8;H0YCY8;A0A7I2YQT5;A0A7I2V6E3;A0A7I2V466;P53634;A0A7I2V5C5	A0A7I2V2Q8;H0YCY8;A0A7I2YQT5;A0A7I2V6E3;A0A7I2V466;P53634	3;2;2;2;2;2;1	3;2;2;2;2;2;1	3;2;2;2;2;2;1	Dipeptidyl peptidase 1;Dipeptidyl peptidase 1 exclusion domain chain;Dipeptidyl peptidase 1 heavy chain;Dipeptidyl peptidase 1 light chain	CTSC	50.745	452	452;325;342;419;450;463;302	0	3.5523	0.34262	0.55976	41.188	NaN	0.2845	NaN	NaN	0.45284	NaN	NaN	29.978	NaN	3105200	2240400	864790	0	0	0	2752700	2139500	613240	352480	100940	251550
O15085;O15085-2	O15085;O15085-2	2;2	2;2	2;2	Rho guanine nucleotide exchange factor 11	ARHGEF11	167.7	1522	1522;1562	0.00079872	2.0365	0.35447	0.561	43.409	NaN	NaN	NaN	NaN	NaN	NaN	NaN	NaN	NaN	38548000	27302000	11246000	127070	94678	32394	38421000	27207000	11214000	0	0	0
P49006	P49006	3	3	3	MARCKS-related protein	MARCKSL1	19.529	195	195	0	20.806	0.26975	0.56129	4.6181	0.26975	NaN	NaN	0.56129	NaN	NaN	4.6181	NaN	NaN	2811300	2439700	371640	2811300	2439700	371640	0	0	0	0	0	0
P50570-3;P50570-2;P50570-5;P50570-4;P50570;K7EMQ3;A0A1B0GUX5;A0A1B0GU67;A0A0D9SFB1;A0A0U1RQP1;A0A0D9SFE4;Q05193-5;Q05193-3;Q05193-2;Q05193	P50570-3;P50570-2;P50570-5;P50570-4;P50570	5;5;5;5;5;1;1;1;1;1;1;1;1;1;1	5;5;5;5;5;1;1;1;1;1;1;1;1;1;1	5;5;5;5;5;1;1;1;1;1;1;1;1;1;1	Dynamin-2	DNM2	97.553	866	866;866;869;870;870;289;320;356;835;856;864;851;851;864;864	0	4.7277	0.36457	0.56438	99.836	NaN	0.36457	NaN	NaN	0.56438	NaN	NaN	99.836	NaN	3434000	2447400	986590	0	0	0	3434000	2447400	986590	0	0	0
E9PPH5;Q9BTT0-3;Q9BTT0	E9PPH5;Q9BTT0-3;Q9BTT0	1;1;1	1;1;1	1;1;1	Acidic leucine-rich nuclear phosphoprotein 32 family member E	ANP32E	13.128	114	114;220;268	0	15.36	0.53674	0.56685	4.8297	NaN	NaN	NaN	NaN	NaN	NaN	NaN	NaN	NaN	2900800	2010800	890000	528100	407040	121060	822070	574500	247560	1550700	1029300	521380
P50914;E7EPB3	P50914;E7EPB3	4;3	4;3	4;3	60S ribosomal protein L14	RPL14	23.432	215	215;124	0	20.088	0.37165	0.56793	62.407	0.31804	0.35211	0.52948	0.56793	0.5602	0.57106	91.572	62.425	51.168	13276000	10106000	3170000	7944300	6500900	1443300	2434700	1784600	650100	2897300	1820800	1076500
A6NNI4;A0A2R8Y478;A0A7I2V3T7;G8JLH6;A0A087WU13;F5GXT1;P21926;A0A7I2V3T0	A6NNI4;A0A2R8Y478;A0A7I2V3T7;G8JLH6;A0A087WU13;F5GXT1;P21926;A0A7I2V3T0	3;3;3;3;3;3;3;2	3;3;3;3;3;3;3;2	3;3;3;3;3;3;3;2	Tetraspanin;CD9 antigen	CD9	17.764	159	159;159;218;251;255;270;228;216	0	3.2758	0.39764	0.56886	60.847	NaN	0.32517	NaN	NaN	0.56886	NaN	NaN	28.813	NaN	27219000	18049000	9170400	4324800	2663600	1661200	15292000	10474000	4818700	7602200	4911700	2690500
K7EJE8;K7EKE6;P36776-3;P36776-2;P36776	K7EJE8;K7EKE6;P36776-3;P36776-2;P36776	3;3;3;3;3	3;3;3;3;3	3;3;3;3;3	Lon protease homolog, mitochondrial	LONP1	93.296	829	829;845;763;895;959	0	2.8634	0.36492	0.56898	11.435	NaN	NaN	NaN	NaN	NaN	NaN	NaN	NaN	NaN	725300	531650	193660	353490	272130	81362	371810	259520	112290	0	0	0
P54687-2;P54687-3;P54687-4;P54687;P54687-5;F5H2F2	P54687-2;P54687-3;P54687-4;P54687;P54687-5;F5H2F2	2;2;2;2;2;1	2;2;2;2;2;1	2;2;2;2;2;1	Branched-chain-amino-acid aminotransferase, cytosolic	BCAT1	36.297	325	325;349;385;386;398;144	0.0054237	1.3711	0.37255	0.57133	32.401	NaN	0.37255	NaN	NaN	0.57133	NaN	NaN	32.401	NaN	2521600	1855100	666560	0	0	0	2521600	1855100	666560	0	0	0
H0Y3P2;D3DQV9;P78344-2;P78344;E9PKF8;H0YE22;H0YCH5	H0Y3P2;D3DQV9;P78344-2;P78344;E9PKF8;H0YE22;H0YCH5	2;2;2;2;1;1;1	2;2;2;2;1;1;1	2;2;2;2;1;1;1	Eukaryotic translation initiation factor 4 gamma 2	EIF4G2	98.117	869	869;907;869;907;185;234;444	0.007348	1.3213	0.47906	0.57204	37.228	NaN	NaN	NaN	NaN	NaN	NaN	NaN	NaN	NaN	1255500	790120	465390	0	0	0	494820	371660	123160	760690	418460	342240
A8MXT8;O00391-2;O00391	A8MXT8;O00391-2;O00391	1;1;1	1;1;1	1;1;1	Sulfhydryl oxidase 1	QSOX1	16.917	155	155;604;747	0.0028011	1.4799	0.25603	0.5727	63.431	NaN	NaN	NaN	NaN	NaN	NaN	NaN	NaN	NaN	6499900	5299100	1200800	1432300	1165100	267270	1418000	1043700	374300	3649500	3090200	559240
A0A087WTL4;A0A087WX97;Q9BXK5-4;Q9BXK5	A0A087WTL4;A0A087WX97;Q9BXK5-4;Q9BXK5	1;1;1;1	1;1;1;1	1;1;1;1	Bcl-2-like protein 13	BCL2L13	48.871	461	461;509;323;485	0	7.2724	0.33076	0.5763	38.889	NaN	NaN	NaN	NaN	NaN	NaN	NaN	NaN	NaN	2527200	1693400	833780	561240	417770	143470	695950	394470	301470	1270000	881160	388830
Q3ZCM7;A0A075B736;Q5SQY0	Q3ZCM7;A0A075B736;Q5SQY0	7;6;6	1;1;1	1;1;1	Tubulin beta-8 chain	TUBB8	49.775	444	444;407;410	0	4.0636	0.32215	0.57748	76.705	NaN	NaN	NaN	NaN	NaN	NaN	NaN	NaN	NaN	7132000	4346300	2785700	356080	307700	48381	2545700	2171200	374480	4230200	1867400	2362900
F8VXC8;Q8TAQ2-2;Q8TAQ2-3;Q8TAQ2	F8VXC8;Q8TAQ2-2;Q8TAQ2-3;Q8TAQ2	1;1;1;1	1;1;1;1	1;1;1;1	SWI/SNF complex subunit SMARCC2	SMARCC2	136.18	1245	1245;1130;1152;1214	0.00083403	2.265	0.41154	0.58132	26.084	NaN	NaN	NaN	NaN	NaN	NaN	NaN	NaN	NaN	1501600	949730	551860	282140	202560	79579	648270	459890	188380	571190	287280	283900
Q96KP4-2;Q96KP4	Q96KP4-2;Q96KP4	3;3	3;3	3;3	Cytosolic non-specific dipeptidase	CNDP2	43.833	391	391;475	0	16.409	0.52442	0.58164	98.233	0.15499	NaN	0.63536	0.26094	NaN	0.68405	113.36	NaN	28.07	4788400	3453200	1335200	1757500	1619900	137590	653640	269690	383960	2377200	1563600	813600
P61026	P61026	4	3	3	Ras-related protein Rab-10	RAB10	22.541	200	200	0	4.2132	0.43525	0.58266	96.396	NaN	NaN	NaN	NaN	NaN	NaN	NaN	NaN	NaN	6033400	4234400	1799100	0	0	0	2889500	2384600	504910	3143900	1849700	1294200
Q6YHK3;Q6YHK3-2;Q6YHK3-4;Q6YHK3-3	Q6YHK3;Q6YHK3-2;Q6YHK3-4;Q6YHK3-3	8;7;7;4	8;7;7;4	8;7;7;4	CD109 antigen	CD109	161.69	1445	1445;1368;1428;665	0	38.956	0.40285	0.58305	31.141	0.42164	0.37154	0.4568	0.79963	0.53906	0.49931	7.0367	36.428	15.649	19611000	13749000	5862600	2493900	1645500	848360	10503000	7792500	2710700	6614300	4310800	2303500
P34897-3;P34897;G3V5L0;G3V2Y4;P34897-2;G3V241;G3V3Y8;G3V4T0;G3V4X0;G3V2W0;G3V2E4;G3V540;G3V4W5;H0YIZ0	P34897-3;P34897;G3V5L0;G3V2Y4;P34897-2	3;3;2;2;2;1;1;1;1;1;1;1;1;1	3;3;2;2;2;1;1;1;1;1;1;1;1;1	3;3;2;2;2;1;1;1;1;1;1;1;1;1	Serine hydroxymethyltransferase, mitochondrial;Serine hydroxymethyltransferase	SHMT2	53.454	483	483;504;215;234;494;142;147;149;159;160;171;192;237;264	0	3.438	0.30861	0.58487	0.59382	0.30861	NaN	NaN	0.58487	NaN	NaN	0.59382	NaN	NaN	2279600	1822900	456730	2279600	1822900	456730	0	0	0	0	0	0
A0A0G2JS82;O94973;O94973-2;A0A0G2JQM1;O94973-3;E9PNC4;A0A0G2JRS3;A0A0G2JQT9;H0YEG0;A0A0G2JRF9;A0A0G2JQA4;E9PR62	A0A0G2JS82;O94973;O94973-2;A0A0G2JQM1;O94973-3	5;5;5;4;4;1;1;1;1;1;1;1	2;2;2;1;1;1;1;1;1;1;1;1	2;2;2;1;1;1;1;1;1;1;1;1	AP-2 complex subunit alpha-2	AP2A2	101.54	917	917;939;940;634;656;125;140;173;185;356;356;378	0	2.9067	0.42162	0.58568	67.665	NaN	0.40652	NaN	NaN	0.57494	NaN	NaN	2.6163	NaN	2127700	1154800	972880	698340	267020	431320	1429400	887830	541560	0	0	0
A0A2R8Y7U1;A0A2R8YGD1;A0A2R8YD45;A0A804HJ17;O14773-2;O14773	A0A2R8Y7U1;A0A2R8YGD1;A0A2R8YD45;A0A804HJ17;O14773-2;O14773	1;1;1;1;1;1	1;1;1;1;1;1	1;1;1;1;1;1	Tripeptidyl-peptidase 1	TPP1	43.568	400	400;470;500;525;320;563	0	3.2732	0.42964	0.58625	25.73	NaN	NaN	NaN	NaN	NaN	NaN	NaN	NaN	NaN	3626200	2547500	1078700	350160	254660	95500	1710300	1303400	406880	1565700	989400	576300
P98160;H0Y5A9	P98160	7;1	7;1	7;1	Basement membrane-specific heparan sulfate proteoglycan core protein;Endorepellin;LG3 peptide	HSPG2	468.83	4391	4391;197	0	7.2678	0.30377	0.58928	103.3	0.16249	NaN	NaN	0.32761	NaN	NaN	100.75	NaN	NaN	8374800	6587100	1787700	6320100	5625100	694950	1257600	728390	529180	797170	233570	563600
A0A0R4J2E8;A8MXP9;P43243;D6R991;B3KM87;D6REM6;P43243-2	A0A0R4J2E8;A8MXP9;P43243;D6R991;B3KM87;D6REM6;P43243-2	2;2;2;1;1;1;1	2;2;2;1;1;1;1	2;2;2;1;1;1;1	Matrin-3	MATR3	94.622	847	847;895;847;433;509;794;559	0	4.8392	0.44781	0.58932	11.337	0.41492	0.38628	0.53902	0.64438	0.51533	0.56698	4.4667	13.834	5.4651	4112300	2854600	1257800	558430	411810	146620	2026300	1468000	558260	1527600	974750	552890
A0A5K1VW97;H0YMF1;P16112-3;P16112-2;P16112;Q6PID9	A0A5K1VW97;H0YMF1;P16112-3;P16112-2;P16112	5;5;5;5;5;1	5;5;5;5;5;1	5;5;5;5;5;1	Aggrecan core protein;Aggrecan core protein 2	ACAN	261.45	2530	2530;2568;2431;2492;2530;721	0	67.867	0.29517	0.59556	24.089	0.29517	NaN	NaN	0.59556	NaN	NaN	24.089	NaN	NaN	4144400	3346900	797490	4144400	3346900	797490	0	0	0	0	0	0
K4DIA7;E9PMR4;P48509;E9PRJ3;E9PLZ6;K4DIB7	K4DIA7;E9PMR4;P48509;E9PRJ3	4;4;4;3;1;1	4;4;4;3;1;1	4;4;4;3;1;1	Tetraspanin;CD151 antigen	CD151	25.588	230	230;251;253;178;176;180	0	4.2276	0.29	0.5964	31.933	0.44811	0.29882	NaN	0.9673	0.52078	NaN	28.02	24.281	NaN	23223000	16446000	6776300	7071200	4672000	2399200	16151000	11774000	4377100	0	0	0
Q13740-2;Q13740;F5GXJ9;H7C543;Q13740-4;Q13740-3	Q13740-2;Q13740;F5GXJ9;H7C543	9;9;8;5;4;2	9;9;8;5;4;2	9;9;8;5;4;2	CD166 antigen	ALCAM	63.664	570	570;583;532;344;305;133	0	14.327	0.32524	0.59954	15.541	0.29126	0.33532	1.9711	0.58449	0.54581	2.085	11.323	16.346	18.538	21425000	14292000	7133800	1847600	1424100	423500	15926000	11451000	4475600	3651500	1416800	2234700
Q02878;F8VR69;F8VZ45;U3KQR5	Q02878	6;1;1;1	6;1;1;1	6;1;1;1	60S ribosomal protein L6	RPL6	32.728	288	288;63;159;160	0	8.0613	0.33971	0.59998	23.073	0.24938	0.33971	0.76356	0.55334	0.58612	0.79397	130.03	2.2626	2.1489	40885000	26366000	14519000	15635000	9781200	5854100	18028000	12065000	5962600	7221700	4519900	2701900
Q63ZY3-3;Q63ZY3;Q63ZY3-2;K7EL48;K7ES05	Q63ZY3-3;Q63ZY3;Q63ZY3-2	6;6;5;1;1	6;6;5;1;1	5;5;4;0;0	KN motif and ankyrin repeat domain-containing protein 2	KANK2	90.043	841	841;851;859;44;147	0	12.266	0.46005	0.60278	7.6941	NaN	NaN	NaN	NaN	NaN	NaN	NaN	NaN	NaN	3881200	2935200	945970	406210	406210	0	1666000	1269900	396140	1809000	1259100	549830
G3V3M6;P27695;G3V3C7;G3V5Q1;G3V5D9;A0A0C4DGK8;G3V5M0;G3V359;G3V3Y6;G3V2D9;H7C4A8	G3V3M6;P27695;G3V3C7;G3V5Q1;G3V5D9;A0A0C4DGK8;G3V5M0;G3V359	5;5;4;4;3;3;3;3;1;1;1	5;5;4;4;3;3;3;3;1;1;1	5;5;4;4;3;3;3;3;1;1;1	DNA-(apurinic or apyrimidinic site) lyase;DNA-(apurinic or apyrimidinic site) lyase, mitochondrial	APEX1	29.19	263	263;318;174;242;107;146;162;172;41;49;150	0	30.242	0.38616	0.60423	28.694	0.31602	0.40397	0.63898	0.55462	0.60235	0.6969	36.358	30.401	20.178	11142000	7510500	3631100	3168600	2355700	812880	5124600	3346200	1778400	2848400	1808600	1039800
O14907	O14907	1	1	1	Tax1-binding protein 3	TAX1BP3	13.735	124	124	0	2.4911	0.36117	0.60785	36.317	NaN	0.37475	NaN	NaN	0.60785	NaN	NaN	12.524	NaN	8561900	6105500	2456400	1229300	887380	341870	3939100	2782200	1156900	3393600	2435900	957680
A0A024R571;Q9H4M9;C9J2Z4;C9JC03;C9JIJ3;C9IZH1;C9JDQ8	A0A024R571;Q9H4M9;C9J2Z4;C9JC03	12;12;7;7;3;3;2	11;11;7;6;2;2;2	11;11;7;6;2;2;2	EH domain-containing protein 1	EHD1	61.927	548	548;534;306;374;145;148;162	0	64.812	0.36801	0.60821	25.44	0.22537	0.38285	0.91829	0.45075	0.60821	0.97207	33.388	25.557	4.5867	47970000	31375000	16595000	10957000	8324400	2632400	21032000	14417000	6615100	15981000	8633700	7347300
H0Y9H2;E7EV99;E7ENY0;A0A804HL01;P35611-2;P35611-6;P35611-4;P35611;P35611-3;P35611-5;H0YFD8;H0YG19;A0A0A0MSR2	H0Y9H2;E7EV99;E7ENY0;A0A804HL01;P35611-2;P35611-6;P35611-4;P35611;P35611-3	8;8;8;8;8;8;8;8;8;3;2;2;2	8;8;8;8;8;8;8;8;8;3;2;2;2	8;8;8;8;8;8;8;8;8;3;2;2;2	Alpha-adducin	ADD1	48.407	444	444;632;663;799;631;662;662;737;768;511;105;114;400	0	130.35	0.3966	0.60874	19.459	0.19458	0.35396	0.51799	0.4127	0.597	0.56965	20.522	23.13	18.187	36628000	26290000	10338000	6366600	5290900	1075700	19451000	14097000	5354800	10810000	6902400	3907200
P16401	P16401	6	4	4	Histone H1.5	HIST1H1B	22.58	226	226	0	5.1787	0.36279	0.60952	36.473	0.36639	0.21272	0.38496	0.97122	0.37688	0.4047	13.88	2.1035	21.455	56809000	42537000	14272000	12210000	8452200	3757600	27926000	22827000	5099300	16673000	11258000	5414700
A2A2D0;P16949;P16949-2;E5RGX5;Q93045;Q93045-2	A2A2D0;P16949;P16949-2;E5RGX5;Q93045;Q93045-2	2;2;2;1;1;1	2;2;2;1;1;1	2;2;2;1;1;1	Stathmin;Stathmin-2	STMN1;STMN2	9.7931	85	85;149;174;168;179;187	0.0007764	1.8871	0.37634	0.6103	88.34	0.42061	NaN	NaN	0.96376	NaN	NaN	119.23	NaN	NaN	7591500	5477500	2114000	4241700	3171200	1070400	3349900	2306300	1043500	0	0	0
H0Y8G5;Q14103-3;Q14103;H0YA96;D6RAF8;Q14103-4;Q14103-2;D6RD83;D6RF44;D6RBQ9	H0Y8G5;Q14103-3;Q14103;H0YA96;D6RAF8;Q14103-4;Q14103-2;D6RD83	4;4;4;3;3;3;3;2;1;1	4;4;4;3;3;3;3;2;1;1	4;4;4;3;3;3;3;2;1;1	Heterogeneous nuclear ribonucleoprotein D0	HNRNPD	29.667	260	260;306;355;210;221;287;336;92;111;155	0	4.8788	0.45964	0.61113	18.143	0.097002	0.3495	0.53438	0.2538	0.54891	0.57165	159.27	126.81	24.63	23190000	19759000	3430700	11013000	9898500	1115000	10613000	8873700	1739000	1564000	987250	576790
Q96RF0-3;Q96RF0-2;Q96RF0	Q96RF0-3;Q96RF0-2;Q96RF0	3;3;3	3;3;3	3;3;3	Sorting nexin-18	SNX18	64.751	591	591;624;628	0	4.0771	0.39191	0.61434	38.095	0.32229	NaN	NaN	0.61434	NaN	NaN	10.923	NaN	NaN	2729900	2046100	683750	1437100	1178300	258750	712100	401500	310600	580700	466300	114400
P09601;A0A7I2V277;A0A7I2V3M0;B1AHA8;A0A7I2V3I1	P09601;A0A7I2V277;A0A7I2V3M0;B1AHA8;A0A7I2V3I1	2;1;1;1;1	2;1;1;1;1	2;1;1;1;1	Heme oxygenase 1	HMOX1	32.818	288	288;124;157;187;249	0	17.198	0.4865	0.61806	114.58	NaN	NaN	0.40049	NaN	NaN	0.41986	NaN	NaN	19.803	9949900	6363600	3586300	778960	228420	550530	1200600	647990	552660	7970300	5487200	2483100
Q9UEY8-2;Q9UEY8	Q9UEY8-2;Q9UEY8	6;5	6;5	6;5	Gamma-adducin	ADD3	75.67	674	674;706	0	10.572	0.48198	0.61949	49.988	0.28281	0.40146	0.57865	0.61065	0.64806	0.59218	94.063	72.878	27.584	25483000	16513000	8970700	7202900	4934200	2268700	8560000	5444800	3115200	9720300	6133500	3586800
A0A669KB68;A0A669KB56;A0A669KBA4;A0A669KB53;P42224;A0A669KBI6;P42224-2;J3KPM9;A0A669KB52;A0A669KB75;E7EPD2;D2KFR9;A0A669KB17;E7ENM1;E9PH66;Q67C41	A0A669KB68;A0A669KB56;A0A669KBA4;A0A669KB53;P42224;A0A669KBI6;P42224-2;J3KPM9;A0A669KB52;A0A669KB75	19;19;19;19;19;17;17;16;13;12;8;7;7;5;3;2	19;19;19;19;19;17;17;16;13;12;8;7;7;5;3;2	19;19;19;19;19;17;17;16;13;12;8;7;7;5;3;2	Signal transducer and activator of transcription 1-alpha/beta;Signal transducer and activator of transcription	STAT1	87.03	748	748;748;779;791;750;716;712;714;636;572;377;193;273;150;69;42	0	250.88	0.36212	0.62014	31.327	0.26101	0.88605	0.35911	0.66987	1.4045	0.37583	21.477	20.26	14.736	240820000	161990000	78831000	57755000	40435000	17320000	50954000	25003000	25951000	132110000	96551000	35559000
P61225	P61225	2	2	2	Ras-related protein Rap-2b	RAP2B	20.504	183	183	0.00077459	1.8833	0.49628	0.62245	27.231	NaN	NaN	NaN	NaN	NaN	NaN	NaN	NaN	NaN	790440	562470	227970	0	0	0	398140	268420	129720	392310	294050	98256
P31942-3;P31942-2;P31942;P31942-4;P31942-6;P31942-5	P31942-3;P31942-2;P31942;P31942-4	3;3;3;2;1;1	3;3;3;2;1;1	3;3;3;2;1;1	Heterogeneous nuclear ribonucleoprotein H3	HNRNPH3	31.525	297	297;331;346;215;139;145	0	4.5195	0.4362	0.62262	32.626	NaN	0.41662	0.50667	NaN	0.6507	0.5446	NaN	34.78	18.936	5455900	3551000	1904900	0	0	0	3526000	2471700	1054300	1929900	1079300	850650
Q13045-2;Q13045-3;Q13045	Q13045-2;Q13045-3;Q13045	3;3;3	3;3;3	3;3;3	Protein flightless-1 homolog	FLII	138.49	1214	1214;1258;1269	0	2.7015	0.40466	0.62433	84.832	NaN	NaN	NaN	NaN	NaN	NaN	NaN	NaN	NaN	10919000	7430100	3489300	2337400	1726100	611320	2443800	1065700	1378100	6138200	4638300	1499900
P04040	P04040	3	3	3	Catalase	CAT	59.755	527	527	0	3.5056	0.36008	0.62467	24.173	NaN	0.45594	NaN	NaN	0.71032	NaN	NaN	32.536	NaN	3576600	2670500	906060	1120900	899670	221230	2455600	1770800	684830	0	0	0
A0A7I2V484;A0A7I2V5M3;P07711-3;P07711	A0A7I2V484;A0A7I2V5M3;P07711-3;P07711	2;2;2;2	2;2;2;2	2;2;2;2	Cathepsin L1;Cathepsin L1 heavy chain;Cathepsin L1 light chain	CTSL	23.685	209	209;258;278;333	0	5.744	0.65421	0.62605	41.457	NaN	NaN	NaN	NaN	NaN	NaN	NaN	NaN	NaN	4729300	2418500	2310800	515600	362220	153380	1060800	740660	320160	3152900	1315600	1837300
Q14152-2;Q14152	Q14152-2;Q14152	3;3	3;3	3;3	Eukaryotic translation initiation factor 3 subunit A	EIF3A	162.63	1348	1348;1382	0.00082034	2.1995	0.54983	0.62698	113.23	NaN	0.39376	0.88781	NaN	0.47947	0.93486	NaN	137.18	18.561	3901200	1878800	2022400	277470	206300	71170	2537200	1157700	1379600	1086500	514870	571630
A0A494BZZ4;C9JGI3;P19971;P19971-2;A0A494C0L3;A0A494C1L9	A0A494BZZ4;C9JGI3;P19971;P19971-2;A0A494C0L3;A0A494C1L9	2;2;2;2;1;1	2;2;2;2;1;1	2;2;2;2;1;1	Thymidine phosphorylase	TYMP	33.243	325	325;445;482;487;107;137	0	2.528	0.45651	0.62788	29.96	NaN	NaN	NaN	NaN	NaN	NaN	NaN	NaN	NaN	4773000	3239600	1533400	594760	299820	294940	1615400	1143300	472040	2562900	1796500	766370
P11177-2;P11177;F8WF02;C9J634;P11177-3	P11177-2;P11177;F8WF02;C9J634;P11177-3	3;3;2;2;2	3;3;2;2;2	3;3;2;2;2	Pyruvate dehydrogenase E1 component subunit beta, mitochondrial	PDHB	37.2	341	341;359;251;350;341	0	2.3543	0.5176	0.62918	184.42	NaN	NaN	NaN	NaN	NaN	NaN	NaN	NaN	NaN	4621800	1422100	3199800	3006100	289620	2716500	312260	178650	133610	1303500	953800	349680
P61960;H0Y614;P61960-2	P61960;H0Y614;P61960-2	2;1;1	2;1;1	2;1;1	Ubiquitin-fold modifier 1	UFM1	9.1175	85	85;81;103	0	5.7029	0.32956	0.62992	25.363	NaN	0.32007	NaN	NaN	0.51832	NaN	NaN	3.5724	NaN	8054700	5652100	2402600	1401800	1066200	335580	4281100	3333200	947860	2371900	1252700	1119200
P07355;H0YMW4;P07355-2;H0YN42;H0YMD0;H0YMU9;A6NMY6;H0YL33;H0YM50;H0YKS4;H0YNB8;H0YNP5;H0YN28;H0YMM1;A0A7I2V4P4;H0YNA0;H0YKZ7;H0YLV6;H0YMT9;H0YKX9;H0YKL9;H0YKV8;H0YMD9;H0YKN4;H0YLE2	P07355;H0YMW4;P07355-2;H0YN42;H0YMD0;H0YMU9;A6NMY6;H0YL33;H0YM50;H0YKS4;H0YNB8;H0YNP5	24;23;23;19;18;18;17;16;16;14;14;12;11;10;10;8;8;8;8;8;7;6;5;4;2	24;23;23;19;18;18;17;16;16;14;14;12;11;10;10;8;8;8;8;8;7;6;5;4;2	24;23;23;19;18;18;17;16;16;14;14;12;11;10;10;8;8;8;8;8;7;6;5;4;2	Annexin A2;Annexin;Putative annexin A2-like protein	ANXA2;ANXA2P2	38.604	339	339;367;357;256;227;230;339;222;248;176;189;175;139;149;155;79;119;132;133;134;110;81;65;69;45	0	323.31	0.42602	0.63329	21.942	0.2652	0.42097	0.765	0.67703	0.50802	0.75797	20.739	22.994	21.68	5245400000	3525500000	1719900000	973930000	765810000	208120000	2535700000	1782100000	753560000	1735800000	977570000	758200000
P09525;Q6P452;P09525-2;B4E1S2	P09525;Q6P452;P09525-2	11;10;9;4	11;10;9;4	11;10;9;4	Annexin A4;Annexin	ANXA4	35.882	319	319;299;237;142	0	174.07	0.43616	0.63426	18.101	0.22436	0.45535	0.43977	0.61735	0.75636	0.4701	12.967	13.101	28.934	92958000	62264000	30693000	16525000	12261000	4264500	37920000	24825000	13095000	38512000	25179000	13333000
E9PCY7;G8JLB6;P31943;E5RGV0;D6RIU0;D6RBM0;E5RGH4;E7EQJ0;D6RAM1;D6R9T0;D6RFM3;D6RIT2;D6RDU3;D6RJ04;D6RIH9;H0YAQ2;E7EN40;H0YB39;E5RJ94;D6R9D3;D6RF17;D6RDL0	E9PCY7;G8JLB6;P31943;E5RGV0;D6RIU0;D6RBM0;E5RGH4;E7EQJ0;D6RAM1;D6R9T0;D6RFM3;D6RIT2;D6RDU3;D6RJ04;D6RIH9	5;5;5;4;4;4;3;3;3;3;3;3;3;3;3;2;2;2;1;1;1;1	5;5;5;4;4;4;3;3;3;3;3;3;3;3;3;2;2;2;1;1;1;1	2;2;2;2;2;2;1;2;2;2;2;2;2;2;2;1;1;0;1;1;1;1	Heterogeneous nuclear ribonucleoprotein H;Heterogeneous nuclear ribonucleoprotein H, N-terminally processed	HNRNPH1	47.087	429	429;472;449;155;168;212;100;115;130;161;163;164;171;172;184;131;166;277;28;40;49;84	0	15.72	0.38108	0.6357	16.083	0.33137	0.38108	0.7024	0.63071	0.59195	0.7493	17.366	24.45	27.447	21546000	14392000	7153600	3907200	2833700	1073500	6296700	4424200	1872500	11342000	7134500	4207700
P46109	P46109	2	2	2	Crk-like protein	CRKL	33.777	303	303	0	3.0915	0.68501	0.63765	10.255	NaN	NaN	NaN	NaN	NaN	NaN	NaN	NaN	NaN	1926500	1215600	710870	560170	380720	179460	605930	394630	211300	760360	440250	320120
P36957-2;P36957;Q86SW4	P36957-2;P36957	4;4;1	4;4;1	4;4;1	Dihydrolipoyllysine-residue succinyltransferase component of 2-oxoglutarate dehydrogenase complex, mitochondrial	DLST	39.552	367	367;453;279	0	5.3424	0.55325	0.63803	2.9608	0.25948	0.6185	0.64961	0.51579	0.77843	0.68744	4.9469	27.665	7.399	10806000	7106100	3700300	2417300	1817700	599670	2724700	1704100	1020600	5664400	3584300	2080000
Q9NS69	Q9NS69	2	2	2	Mitochondrial import receptor subunit TOM22 homolog	TOMM22	15.521	142	142	0	3.3288	0.48162	0.63983	12.74	0.2154	NaN	0.66337	0.40648	NaN	0.70014	32.281	NaN	28.187	4229800	2885700	1344100	1415100	1167500	247610	1058500	584260	474210	1756300	1134000	622240
M0QY80;M0QXB5;O95571	M0QY80;M0QXB5;O95571	1;1;1	1;1;1	1;1;1	Persulfide dioxygenase ETHE1, mitochondrial	ETHE1	10.632	95	95;260;254	0.0015152	1.7783	0.59116	0.64205	94.277	NaN	NaN	NaN	NaN	NaN	NaN	NaN	NaN	NaN	2963400	1853100	1110200	859420	673480	185940	723630	386110	337510	1380300	793530	586790
O15400-2;O15400	O15400-2;O15400	2;2	2;2	2;2	Syntaxin-7	STX7	27.4	239	239;261	0	6.6469	0.38004	0.64377	5.2641	NaN	NaN	NaN	NaN	NaN	NaN	NaN	NaN	NaN	4581000	3095400	1485600	933630	776330	157310	2261600	1466600	794960	1385700	852460	533280
P04083;Q5T3N1;Q5T3N0	P04083;Q5T3N1	21;11;7	21;11;7	20;10;7	Annexin A1;Annexin	ANXA1	38.714	346	346;204;115	0	323.31	0.57562	0.64406	27.064	0.23405	0.56282	0.60932	0.60055	0.98455	0.62469	35.647	24.361	19.954	1023800000	664170000	359640000	192750000	154920000	37831000	307990000	199040000	108950000	523070000	310210000	212860000
P80723;P80723-2;U3KQP0	P80723;P80723-2	12;9;2	12;9;2	12;9;2	Brain acid soluble protein 1	BASP1	22.693	227	227;173;45	0	299.08	0.48018	0.64473	18.32	0.47658	0.27617	0.52894	1.2349	0.47989	0.56953	10.582	26.402	18.802	279940000	188080000	91852000	51951000	33606000	18345000	87932000	65544000	22388000	140050000	88934000	51119000
F6TLX2;Q9HC38-2;Q9HC38;I3L1I0;I3L3Q4;Q9HC38-3	F6TLX2;Q9HC38-2;Q9HC38;I3L1I0;I3L3Q4;Q9HC38-3	2;2;2;1;1;1	2;2;2;1;1;1	2;2;2;1;1;1	Glyoxalase domain-containing protein 4	GLOD4	54.719	502	502;298;313;115;227;188	0	3.4061	0.37681	0.64482	5.7107	NaN	0.37681	NaN	NaN	0.63554	NaN	NaN	2.1158	NaN	6563900	4486500	2077400	961630	627490	334130	3772000	2842500	929550	1830300	1016500	813760
Q9C0C2;Q9C0C2-2;A0A2R8Y5C4;E9PKE7;E9PKK0	Q9C0C2;Q9C0C2-2	8;4;2;1;1	8;4;2;1;1	8;4;2;1;1	182 kDa tankyrase-1-binding protein	TNKS1BP1	181.79	1729	1729;778;283;143;243	0	21.057	0.46968	0.64509	0.67317	0.44955	0.4263	0.72504	0.7962	0.62336	0.77072	47.796	11.625	14.798	6680200	4656800	2023400	1468800	1205500	263250	3445500	2408700	1036800	1765900	1042600	723340
O00410;O00410-3;H0Y8C6;O00410-2;E7ETV3;H0Y3V4;E7EWK4;E7EX05;E7EV12;E7EQT5;C9JXE0;C9J875;C9JQT6;C9JZD8;E7ETV8;E7ESZ1;O60518	O00410;O00410-3;H0Y8C6;O00410-2	15;15;14;14;4;3;2;2;2;2;1;1;1;1;1;1;1	15;15;14;14;4;3;2;2;2;2;1;1;1;1;1;1;1	15;15;14;14;4;3;2;2;2;2;1;1;1;1;1;1;1	Importin-5	IPO5	123.63	1097	1097;1115;1099;1037;170;151;99;101;124;126;46;57;70;74;80;88;1105	0	188.57	0.57522	0.64536	49.444	0.11198	0.94162	0.52824	0.30943	1.378	0.58547	30.356	34.157	12.22	55629000	37705000	17923000	11990000	10088000	1901300	13243000	6967800	6275600	30395000	20649000	9746500
O14495;A0A286YF41;A0A286YEZ7;A0A286YES4	O14495	6;2;2;2	6;2;2;2	6;2;2;2	Lipid phosphate phosphohydrolase 3	PPAP2B	35.116	311	311;94;145;224	0	29.402	0.4957	0.64562	35.356	0.1848	0.66516	0.60346	0.47267	1.1637	0.63502	24.463	55.59	13.185	131110000	90668000	40445000	42470000	34631000	7839100	35291000	21145000	14147000	53352000	34893000	18459000
P08758;D6RBL5;D6RBE9;E9PHT9;D6RCN3	P08758;D6RBL5;D6RBE9;E9PHT9	17;11;10;9;2	17;11;10;9;2	17;11;10;9;2	Annexin A5;Annexin	ANXA5	35.936	320	320;260;220;163;35	0	323.31	0.36754	0.64599	12.996	0.22114	0.39316	0.77266	0.57119	0.65054	0.80353	16.123	24.78	15.585	2182900000	1516100000	666810000	774690000	626030000	148670000	823160000	564880000	258280000	585030000	325170000	259860000
E9PH05;F8W7Q4;Q96A26	E9PH05;F8W7Q4;Q96A26	1;1;1	1;1;1	1;1;1	Protein FAM162A	FAM162A	15.959	141	141;144;154	0	3.2049	0.87947	0.64661	26.359	NaN	NaN	NaN	NaN	NaN	NaN	NaN	NaN	NaN	4473200	2827500	1645600	865310	578450	286860	1318500	949930	368550	2289400	1299200	990220
CON__P35527;P35527;K7EQQ3	CON__P35527;P35527;K7EQQ3	17;17;9	17;17;9	17;17;9	Keratin, type I cytoskeletal 9	KRT9	62.129	623	623;623;390	0	323.31	0.40212	0.64694	24.985	0.37613	0.22823	0.61348	1.0671	0.39856	0.65757	28.089	28.271	15.779	287700000	198570000	89124000	54458000	38333000	16125000	125490000	98519000	26973000	107750000	61723000	46026000
P21589-2;P21589;Q96B60;H0Y7R7;H0Y3X5	P21589-2;P21589;Q96B60	12;12;7;3;1	12;12;7;3;1	12;12;7;3;1	5-nucleotidase	NT5E	57.948	524	524;574;264;230;179	0	101.45	0.39864	0.64843	14.909	0.24269	0.41812	0.45096	0.60836	0.72788	0.45948	6.6061	16.542	33.468	369500000	258900000	110600000	48964000	38737000	10227000	65652000	45279000	20373000	254880000	174880000	80002000
H0YF27;H0YD78;E9PIQ2;E9PRL4;Q14134-2;Q14134	H0YF27;H0YD78;E9PIQ2;E9PRL4;Q14134-2;Q14134	2;1;1;1;1;1	2;1;1;1;1;1	2;1;1;1;1;1	Tripartite motif-containing protein 29	TRIM29	18.671	169	169;119;121;327;570;588	0.0028269	1.507	0.51852	0.64994	19.752	NaN	NaN	0.72349	NaN	NaN	0.72178	NaN	NaN	7.0129	49826000	31813000	18013000	200580	137030	63550	22199000	14903000	7295500	27426000	16772000	10654000
P05120;E7ERB5;E7EPJ9;E9PDK7;H7C004;H7BYS2	P05120;E7ERB5;E7EPJ9;E9PDK7	4;3;3;2;1;1	4;3;3;2;1;1	4;3;3;2;1;1	Plasminogen activator inhibitor 2	SERPINB2	46.596	415	415;132;161;113;253;280	0	5.9913	0.4461	0.65168	72.153	0.18044	NaN	1.2069	0.3665	NaN	1.2536	9.1335	NaN	20.261	10468000	5602900	4865300	2085900	1743200	342680	0	0	0	8382300	3859700	4522600
P10809;A0A7I2V599;A0A7I2V2X6;A0A7I2YQK6;A0A7I2V5K3;A0A7I2YQ71;A0A7I2V369;A0A7I2V5M1;E7EXB4;E7ESH4;P10809-2;C9JL25	P10809;A0A7I2V599;A0A7I2V2X6;A0A7I2YQK6;A0A7I2V5K3;A0A7I2YQ71;A0A7I2V369;A0A7I2V5M1	12;11;10;9;6;6;6;6;5;5;2;1	12;11;10;9;6;6;6;6;5;5;2;1	12;11;10;9;6;6;6;6;5;5;2;1	60 kDa heat shock protein, mitochondrial	HSPD1	61.054	573	573;537;541;482;296;310;322;375;221;231;158;175	0	147.62	0.60369	0.65708	33.705	0.18345	0.72348	0.59291	0.42341	1.1532	0.64298	10.786	19.341	13.366	111300000	69534000	41771000	23468000	18347000	5121300	28443000	15858000	12586000	59393000	35329000	24064000
A0A7I2V428;C9JLB1;A0A7I2V3F3;P19338;A0A7I2V5M5;H7BY16;A0A7I2V699;A0A7I2V2U7;A0A7I2V349;A0A7I2V506;A0A7I2V2S8	A0A7I2V428;C9JLB1;A0A7I2V3F3;P19338;A0A7I2V5M5;H7BY16;A0A7I2V699;A0A7I2V2U7;A0A7I2V349;A0A7I2V506	8;8;8;8;7;7;6;6;5;5;2	8;8;8;8;7;7;6;6;5;5;2	8;8;8;8;7;7;6;6;5;5;2	Nucleolin	NCL	74.739	689	689;694;695;710;672;734;616;626;595;602;389	0	28.239	0.43355	0.65733	17.043	0.3014	0.38082	0.6235	0.80155	0.62733	0.66197	12.133	29.27	10.445	43765000	30510000	13256000	13560000	9949900	3609700	16773000	11952000	4820400	13433000	8607500	4825600
A0A1W2PPX5;A0A1W2PQR6;A0A1W2PQB7;A0A1W2PS43;A0A1W2PRS1;Q14108;Q14108-2;A0A1W2PRF6;A0A1W2PPU6;D6RDG0;A0A1W2PS70;A0A1W2PNX7;A0A1W2PSE4;A0A1W2PQL5	A0A1W2PPX5;A0A1W2PQR6;A0A1W2PQB7;A0A1W2PS43;A0A1W2PRS1;Q14108;Q14108-2;A0A1W2PRF6;A0A1W2PPU6	6;6;6;6;6;6;5;4;4;2;2;2;2;1	6;6;6;6;6;6;5;4;4;2;2;2;2;1	6;6;6;6;6;6;5;4;4;2;2;2;2;1	Lysosome membrane protein 2	SCARB2	49.204	432	432;449;470;475;519;478;335;320;438;106;141;145;206;174	0	17.784	0.41443	0.65832	19.449	0.37598	0.38779	0.57483	1.0388	0.6478	0.628	27.85	19.26	11.649	49938000	33895000	16043000	7853900	5374000	2479900	18985000	13875000	5110400	23098000	14646000	8452600
G3V2V8;J3KMY5;G3V3E8;E7EMS2;G3V3D1;P61916-2;P61916;H0YIZ1	G3V2V8;J3KMY5;G3V3E8;E7EMS2;G3V3D1;P61916-2;P61916;H0YIZ1	4;4;4;4;4;4;4;3	4;4;4;4;4;4;4;3	4;4;4;4;4;4;4;3	Epididymal secretory protein E1	NPC2	13.078	122	122;148;174;201;221;125;151;173	0	8.0896	0.44163	0.659	27.473	NaN	0.48696	0.44542	NaN	0.8003	0.48616	NaN	88.481	15.546	10328000	7436200	2892200	0	0	0	7468900	5610100	1858900	2859400	1826100	1033300
P29401;P29401-2;A0A0B4J1R6;E9PFF2;F8W888	P29401;P29401-2;A0A0B4J1R6	13;13;11;6;2	13;13;11;6;2	13;13;11;6;2	Transketolase	TKT	67.877	623	623;631;457;334;153	0	132.2	0.38011	0.65911	43.436	0.30114	0.3738	0.55324	0.80234	0.64724	0.59013	31.619	51.8	13.425	284750000	197840000	86905000	72791000	52611000	20180000	97090000	70320000	26769000	114870000	74910000	39956000
O00487	O00487	1	1	1	26S proteasome non-ATPase regulatory subunit 14	PSMD14	34.577	310	310	0.0022043	1.6663	0.59245	0.65973	23.293	NaN	NaN	NaN	NaN	NaN	NaN	NaN	NaN	NaN	2906400	1943600	962760	673220	447410	225820	1316100	895570	420550	917000	600620	316390
P08621-2;P08621;P08621-3;P08621-4	P08621-2;P08621;P08621-3;P08621-4	2;2;1;1	2;2;1;1	2;2;1;1	U1 small nuclear ribonucleoprotein 70 kDa	SNRNP70	50.617	428	428;437;166;341	0	7.773	0.50199	0.65997	0.28504	NaN	NaN	NaN	NaN	NaN	NaN	NaN	NaN	NaN	2529700	1777200	752550	0	0	0	1366700	1046300	320390	1163000	730810	432160
P14174	P14174	1	1	1	Macrophage migration inhibitory factor	MIF	12.476	115	115	0.00080128	2.06	0.27098	0.66017	47.469	NaN	NaN	NaN	NaN	NaN	NaN	NaN	NaN	NaN	50291000	33847000	16445000	11201000	8811900	2388700	23091000	18496000	4595200	16000000	6539000	9460700
Q12965	Q12965	3	3	2	Unconventional myosin-Ie	MYO1E	127.06	1108	1108	0.00080515	2.0808	0.62399	0.66093	4.7588	NaN	NaN	0.62399	NaN	NaN	0.66093	NaN	NaN	4.7588	1012800	615860	396910	0	0	0	0	0	0	1012800	615860	396910
Q16401-2;Q16401;F2Z3J2	Q16401-2;Q16401	3;3;1	3;3;1	3;3;1	26S proteasome non-ATPase regulatory subunit 5	PSMD5	51.311	461	461;504;72	0	3.0368	0.48709	0.66242	11.048	NaN	NaN	NaN	NaN	NaN	NaN	NaN	NaN	NaN	786060	552130	233930	313970	211900	102070	0	0	0	472090	340220	131860
Q04828;H0Y804;B4DK69;P52895;S4R3P0;P52895-2	Q04828;H0Y804;B4DK69;P52895	5;4;4;4;2;2	5;4;4;4;2;2	2;1;2;2;1;1	Aldo-keto reductase family 1 member C1;Aldo-keto reductase family 1 member C2	AKR1C1;AKR1C2	36.788	323	323;248;297;323;200;139	0	23.447	0.3515	0.66496	17.143	0.32734	0.38405	0.09947	0.69314	0.64027	0.10367	24.396	17.929	17.74	41055000	31622000	9432800	7683000	5583000	2100000	18942000	13036000	5905700	14430000	13003000	1427000
H0YM70;A0A087X1Z3;Q9UL46;H0YKU2	H0YM70;A0A087X1Z3;Q9UL46	3;3;3;1	3;3;3;1	3;3;3;1	Proteasome activator complex subunit 2	PSME2	26.011	228	228;254;239;85	0	6.6788	0.40096	0.66502	66.302	NaN	0.29413	1.1149	NaN	0.49443	1.1734	NaN	70.175	16.61	12884000	8681100	4202600	1251300	1105900	145380	5719500	4125100	1594400	5912900	3450100	2462800
Q9H444	Q9H444	2	2	2	Charged multivesicular body protein 4b	CHMP4B	24.95	224	224	0	7.9136	0.43232	0.66763	7.0558	NaN	NaN	NaN	NaN	NaN	NaN	NaN	NaN	NaN	4293500	2646800	1646700	995150	730190	264960	1767700	1332900	434780	1530700	583760	946910
P13010	P13010	8	8	8	X-ray repair cross-complementing protein 5	XRCC5	82.704	732	732	0	192.3	0.47011	0.66785	8.1721	0.32552	0.47011	0.51337	0.66785	0.76311	0.53486	27.706	1.6676	7.54	36826000	22175000	14651000	9679200	7498600	2180600	15927000	7939600	7987100	11220000	6737100	4483200
I3L0N3;P46459-2;P46459;I3L0L3	I3L0N3;P46459-2;P46459;I3L0L3	4;4;4;2	4;4;4;2	4;4;4;2	Vesicle-fusing ATPase	NSF	82.091	739	739;644;744;161	0	4.7924	0.57207	0.66849	69.007	0.12972	0.65609	0.62779	0.24696	1.0389	0.66849	35.578	22.698	19.02	8012800	5450100	2562600	1739200	1462600	276550	2824000	1654800	1169100	3449600	2332700	1117000
Q8NHP8-2;Q8NHP8	Q8NHP8-2;Q8NHP8	4;4	4;4	4;4	Putative phospholipase B-like 2;Putative phospholipase B-like 2 32 kDa form;Putative phospholipase B-like 2 45 kDa form	PLBD2	61.884	557	557;589	0	6.5779	0.42155	0.6685	41.52	NaN	0.41385	NaN	NaN	0.66008	NaN	NaN	6.594	NaN	7577900	4746000	2831900	894670	505040	389640	4923400	3428600	1494900	1759800	812410	947390
A0A7I2V4J2;A0A7I2V5Y7;A0A7I2V535;Q15233-2;Q15233;H7C367;A0A7I2V4N2;A0A7I2V464;A0A7I2V4K9;A0A7P0MRW0	A0A7I2V4J2;A0A7I2V5Y7;A0A7I2V535;Q15233-2;Q15233;H7C367;A0A7I2V4N2;A0A7I2V464;A0A7I2V4K9;A0A7P0MRW0	4;4;4;4;4;2;2;2;2;2	3;3;3;3;3;1;1;1;2;1	3;3;3;3;3;1;1;1;2;1	Non-POU domain-containing octamer-binding protein	NONO	53.818	468	468;476;501;382;471;234;360;360;411;515	0	3.3907	0.43756	0.66957	19.053	0.37879	0.39098	NaN	0.78193	0.62048	NaN	21.94	19.258	NaN	5658800	3756500	1902300	1547700	1054800	492890	2802400	1917400	885040	1308600	784240	524350
Q5T925;Q9BX66-12	Q5T925;Q9BX66-12	1;1	1;1	1;1		SORBS1	21.083	186	186;1294	1	-2	0.49096	0.66995	42.056	NaN	NaN	NaN	NaN	NaN	NaN	NaN	NaN	NaN	606430	360460	245970	268140	174230	93905	338290	186230	152060	0	0	0
P68366-2;P68366;C9JDL2;C9JEV8;C9JQ00;C9JJQ8	P68366-2;P68366	13;13;4;4;4;4	2;2;1;1;1;1	2;2;1;1;1;1	Tubulin alpha-4A chain	TUBA4A	48.328	433	433;448;119;153;180;198	0	6.1031	0.37943	0.67134	57.977	NaN	NaN	NaN	NaN	NaN	NaN	NaN	NaN	NaN	2884600	1866300	1018400	861620	512220	349410	789040	689830	99210	1234000	664220	569740
P54886-2;P54886	P54886-2;P54886	2;2	2;2	2;2	Delta-1-pyrroline-5-carboxylate synthase;Glutamate 5-kinase;Gamma-glutamyl phosphate reductase	ALDH18A1	87.088	793	793;795	0.0078792	1.2672	0.36317	0.67197	4.7045	0.36317	NaN	NaN	0.67197	NaN	NaN	4.7045	NaN	NaN	1206300	887700	318570	1206300	887700	318570	0	0	0	0	0	0
A0A0A0MTJ9;Q6PIU2-3;Q6PIU2;Q6PIU2-2	A0A0A0MTJ9;Q6PIU2-3;Q6PIU2;Q6PIU2-2	1;1;1;1	1;1;1;1	1;1;1;1	Neutral cholesterol ester hydrolase 1	NCEH1	49.881	448	448;275;408;416	0.0014881	1.702	0.59457	0.6733	17.262	NaN	NaN	NaN	NaN	NaN	NaN	NaN	NaN	NaN	1198300	671530	526740	0	0	0	313760	187930	125830	884510	483600	400910
Q9HB71-3;Q9HB71	Q9HB71-3;Q9HB71	1;1	1;1	1;1	Calcyclin-binding protein	CACYBP	21.228	185	185;228	0	10.282	0.41058	0.67333	14.845	NaN	NaN	NaN	NaN	NaN	NaN	NaN	NaN	NaN	1578000	1183400	394640	600940	460860	140070	977100	722530	254560	0	0	0
Q96CV9-3;Q96CV9-2;Q96CV9;H7C1H4	Q96CV9-3;Q96CV9-2;Q96CV9	3;3;3;1	3;3;3;1	3;3;3;1	Optineurin	OPTN	59.559	520	520;571;577;126	0	6.3426	0.38899	0.67551	34.242	NaN	NaN	NaN	NaN	NaN	NaN	NaN	NaN	NaN	2292300	1703100	589260	1177100	983670	193430	1115200	719390	395830	0	0	0
Q9BSJ8;Q9BSJ8-2;F8VZB1	Q9BSJ8;Q9BSJ8-2	9;9;1	9;9;1	9;9;1	Extended synaptotagmin-1	ESYT1	122.85	1104	1104;1114;88	0	12.983	0.53771	0.67564	26.455	0.39868	0.49193	0.66369	0.68932	0.65544	0.69647	39.967	32.125	14.678	15050000	10012000	5038300	1583500	1112800	470660	6528900	4584800	1944100	6937800	4314300	2623500
Q14974;Q14974-2;J3KTM9;J3QRG4;J3QR48;J3KS06;J3QKQ5	Q14974;Q14974-2;J3KTM9	10;8;7;2;2;1;1	10;8;7;2;2;1;1	10;8;7;2;2;1;1	Importin subunit beta-1	KPNB1	97.169	876	876;731;690;60;148;22;248	0	39.208	0.44172	0.6796	26.414	0.25674	0.53674	0.98208	0.47931	0.86762	1.0495	24.571	19.068	25.903	27515000	17172000	10344000	9680300	7349500	2330800	7799100	5073500	2725600	10036000	4749000	5287100
O60749;O60749-2;D6RC15	O60749;O60749-2	4;3;1	4;3;1	2;1;1	Sorting nexin-2	SNX2	58.47	519	519;402;265	0	4.3835	0.62151	0.68061	20.12	0.32386	0.99599	0.63521	0.63271	1.5419	0.67513	9.9923	28.343	1.1418	9033100	5462500	3570500	1902200	1381700	520420	3706300	2067100	1639200	3424600	2013600	1410900
P49773;D6REP8;D6RE99;H0YC49;D6RD60;A0A6Q8PGQ8	P49773;D6REP8;D6RE99;H0YC49;D6RD60;A0A6Q8PGQ8	2;1;1;1;1;1	2;1;1;1;1;1	2;1;1;1;1;1	Histidine triad nucleotide-binding protein 1	HINT1	13.802	126	126;78;78;91;103;109	0	2.5604	0.33425	0.68228	24.925	0.28643	0.39006	NaN	0.6817	0.68285	NaN	9.2562	40.594	NaN	12661000	8304100	4357300	4249600	3194100	1055500	6450600	4334000	2116500	1961300	775980	1185300
E7EMB1;Q9UH65	E7EMB1;Q9UH65	1;1	1;1	1;1	Switch-associated protein 70	SWAP70	62.032	527	527;585	0.0067385	1.3479	0.55906	0.68412	34.792	NaN	0.57377	NaN	NaN	0.85658	NaN	NaN	43.078	NaN	5132900	3108600	2024300	905060	706110	198950	1836600	1079500	757060	2391300	1323000	1068300
O95865;A0A140T971;Q5SSV3;Q5SRR8;H0Y7N1	O95865;A0A140T971;Q5SSV3;Q5SRR8;H0Y7N1	5;4;4;4;3	5;4;4;4;3	5;4;4;4;3	N(G),N(G)-dimethylarginine dimethylaminohydrolase 2	DDAH2	29.644	285	285;225;226;236;188	0	11.328	0.40738	0.68604	18.951	0.33106	0.40738	0.72539	0.7766	0.68604	0.78505	32.774	9.4278	27.133	42525000	26761000	15764000	8584900	5898700	2686300	15743000	10761000	4981800	18197000	10102000	8095500
M0R1S0;M0QZ21;M0R0N4;X6R390;M0QYZ2;P53680-2;P53680	M0R1S0;M0QZ21;M0R0N4;X6R390;M0QYZ2;P53680-2;P53680	1;1;1;1;1;1;1	1;1;1;1;1;1;1	1;1;1;1;1;1;1	AP-2 complex subunit sigma	AP2S1	11.034	92	92;122;144;156;158;104;142	0.002886	1.5869	0.41399	0.68605	34.997	NaN	NaN	NaN	NaN	NaN	NaN	NaN	NaN	NaN	4836100	3048100	1788000	1133200	814930	318280	1991100	1396100	595030	1711800	837120	874660
J3KTL2;Q07955-3;Q07955;Q07955-2;J3KSR8;J3QQV5;J3KSW7	J3KTL2;Q07955-3;Q07955;Q07955-2;J3KSR8	6;6;6;6;3;2;2	6;6;6;6;3;2;2	6;6;6;6;3;2;2	Serine/arginine-rich splicing factor 1	SRSF1	28.329	253	253;201;248;292;143;65;73	0	5.4773	0.46778	0.6873	4.7275	0.25839	0.39349	0.61785	0.47143	0.58659	0.6873	78.531	8.2618	15.034	7122300	4963800	2158400	1421300	1023200	398180	4780300	3404600	1375700	920590	536070	384520
P29992;K7EL62;P50148;A0A087WVZ3;O95837	P29992;K7EL62;P50148	4;2;2;1;1	4;2;2;1;1	4;2;2;1;1	Guanine nucleotide-binding protein subunit alpha-11;Guanine nucleotide-binding protein G(q) subunit alpha	GNA11;GNAQ	42.123	359	359;236;359;72;355	0	6.9744	0.40308	0.68761	28.599	0.34457	0.40308	NaN	0.81611	0.71297	NaN	45.688	25.804	NaN	14824000	9854500	4969600	3369400	2444400	924970	9676000	6461300	3214800	1778700	948830	829850
G3V4W0;B4DY08;B2R5W2;G3V4C1;G3V2Q1;P07910-4;P07910-2;P07910;G3V576;G3V5X6;G3V3K6;G3V251;B4DSU6;G3V555;G3V575;A0A0G2JPF8;A0A0G2JNQ3;P0DMR1;O60812;B7ZW38;B2RXH8;G3V5V7;G3V2D6;P07910-3;G3V2H6;G3V4M8	G3V4W0;B4DY08;B2R5W2;G3V4C1;G3V2Q1;P07910-4;P07910-2;P07910;G3V576;G3V5X6;G3V3K6;G3V251;B4DSU6;G3V555;G3V575;A0A0G2JPF8;A0A0G2JNQ3;P0DMR1;O60812;B7ZW38;B2RXH8	5;5;5;5;5;5;5;5;4;3;3;3;3;3;3;3;3;3;3;3;3;2;2;2;1;1	5;5;5;5;5;5;5;5;4;3;3;3;3;3;3;3;3;3;3;3;3;2;2;2;1;1	5;5;5;5;5;5;5;5;4;3;3;3;3;3;3;3;3;3;3;3;3;2;2;2;1;1	Heterogeneous nuclear ribonucleoproteins C1/C2;Heterogeneous nuclear ribonucleoprotein C-like 4;Heterogeneous nuclear ribonucleoprotein C-like 1;Heterogeneous nuclear ribonucleoprotein C-like 3;Heterogeneous nuclear ribonucleoprotein C-like 2	HNRNPC;HNRNPCL4;HNRNPCL1;HNRNPCL3;HNRNPCL2	28.916	262	262;288;290;292;305;250;293;306;231;117;121;126;147;175;187;293;293;293;293;293;293;180;214;226;54;66	0	25.112	0.38071	0.68804	33.828	0.34424	0.57579	NaN	0.84772	0.99798	NaN	16.685	44.848	NaN	41577000	29485000	12092000	25815000	18541000	7273700	14922000	10435000	4486700	840360	508700	331660
P49189;P49189-3;P49189-2	P49189;P49189-3;P49189-2	5;4;3	5;4;3	5;4;3	4-trimethylaminobutyraldehyde dehydrogenase	ALDH9A1	53.801	494	494;518;424	0	10.478	0.58128	0.68854	29.359	0.1991	0.56325	0.58086	0.39942	0.91013	0.61042	20.677	22.419	1.8568	22808000	14198000	8609900	2456400	1920600	535800	3356700	1947000	1409700	16995000	10330000	6664400
P30048-2;P30048	P30048-2;P30048	4;4	4;4	4;4	Thioredoxin-dependent peroxide reductase, mitochondrial	PRDX3	25.838	238	238;256	0	12.149	0.55708	0.69016	13.935	0.34039	0.50712	0.62334	0.78536	0.87881	0.6637	25.647	20.37	13.444	32250000	21811000	10440000	6791500	5508300	1283200	9577500	6594200	2983300	15881000	9708000	6173000
G5E9W8;C9JQ42;P46976-3;P46976-2;P46976	G5E9W8;C9JQ42;P46976-3;P46976-2;P46976	3;3;3;3;3	3;3;3;3;3	3;3;3;3;3	Glycogenin-1	GYG1	21.51	193	193;265;279;333;350	0	4.891	0.41859	0.69037	67.951	NaN	0.36609	1.2325	NaN	0.58992	1.3161	NaN	50.505	32.899	7115500	4798000	2317500	0	0	0	5170800	3863400	1307400	1944700	934610	1010100
Q9Y6N5;H3BNX3;H3BNP9;H3BMS6	Q9Y6N5;H3BNX3	3;2;1;1	3;2;1;1	3;2;1;1	Sulfide:quinone oxidoreductase, mitochondrial	SQRDL	49.96	450	450;289;124;181	0	4.9526	0.51591	0.69192	109.83	0.61031	0.46321	0.53534	1.5325	0.75535	0.57695	149.68	1.4297	11.863	14162000	8756500	5405900	4531900	2356800	2175200	4202800	2881200	1321600	5427600	3518500	1909100
Q01105-2;A0A0C4DFV9;Q01105-3;Q01105-4;Q01105;P0DME0	Q01105-2;A0A0C4DFV9;Q01105-3;Q01105-4;Q01105;P0DME0	4;3;3;3;3;2	4;3;3;3;3;2	4;3;3;3;3;2	Protein SET;Protein SETSIP	SET;SETSIP	32.103	277	277;266;265;268;290;302	0	11.342	0.52557	0.6931	16.076	0.33041	0.44157	0.57224	0.89852	0.75886	0.59594	23.074	29.281	11.144	26998000	18123000	8875000	9586600	7014100	2572500	7231900	4633800	2598100	10179000	6474600	3704500
P04181	P04181	1	1	1	Ornithine aminotransferase, mitochondrial;Ornithine aminotransferase, hepatic form;Ornithine aminotransferase, renal form	OAT	48.534	439	439	0.0022075	1.6689	0.36309	0.69412	6.7607	0.36309	NaN	NaN	0.69412	NaN	NaN	6.7607	NaN	NaN	1494100	1194100	300040	1494100	1194100	300040	0	0	0	0	0	0
Q5SRQ3;Q5SRQ6;P67870	Q5SRQ3;Q5SRQ6;P67870	1;1;1	1;1;1	1;1;1	Casein kinase II subunit beta	CSNK2B-LY6G5B-1181;CSNK2B	26.673	228	228;234;215	0.0028389	1.5228	0.53419	0.69519	10.946	NaN	NaN	NaN	NaN	NaN	NaN	NaN	NaN	NaN	2761600	1920800	840760	0	0	0	1406300	1056000	350290	1355300	864840	490470
O60701;O60701-2;O60701-3;E7ER83;E7ETF4;E7EV97;E7ER95;D6RHF4;E9PBD2	O60701;O60701-2;O60701-3	16;14;11;6;6;6;4;1;1	16;14;11;6;6;6;4;1;1	16;14;11;6;6;6;4;1;1	UDP-glucose 6-dehydrogenase	UGDH	55.023	494	494;427;397;130;153;181;84;53;55	0	53.321	0.43563	0.69753	29.335	0.30815	0.59239	0.42897	0.7779	1.0233	0.45892	34.052	26.386	17.104	261440000	174310000	87134000	50089000	35956000	14133000	74831000	44188000	30643000	136520000	94164000	42358000
P31949	P31949	4	4	4	Protein S100-A11;Protein S100-A11, N-terminally processed	S100A11	11.74	105	105	0	88.837	0.37505	0.69969	96.104	0.25912	0.53671	0.9475	0.65996	0.73651	0.99171	9.5837	100.56	222.95	467950000	311300000	156640000	168180000	134770000	33415000	198470000	126680000	71790000	101300000	49856000	51440000
Q7Z434-4;Q7Z434	Q7Z434-4;Q7Z434	2;2	2;2	2;2	Mitochondrial antiviral-signaling protein	MAVS	40.467	399	399;540	0	3.4565	0.69384	0.70066	12.836	NaN	NaN	0.6174	NaN	NaN	0.64805	NaN	NaN	16.996	4455700	3073700	1382000	0	0	0	846230	646780	199450	3609500	2427000	1182500
Q13263-2;Q13263;M0R0K9	Q13263-2;Q13263;M0R0K9	5;5;3	5;5;3	5;5;3	Transcription intermediary factor 1-beta	TRIM28	79.473	753	753;835;460	0	27.729	0.43545	0.70096	94.221	0.44014	0.43081	NaN	0.77522	0.68802	NaN	132.82	3.4727	NaN	7464800	5587400	1877500	2283300	1523400	759930	5181600	4064000	1117600	0	0	0
Q9UIJ7-2;Q9UIJ7-3;Q9UIJ7	Q9UIJ7-2;Q9UIJ7-3;Q9UIJ7	2;2;2	2;2;2	2;2;2	GTP:AMP phosphotransferase AK3, mitochondrial	AK3	18.192	157	157;187;227	0	5.1953	0.40705	0.70109	28.12	0.27247	NaN	NaN	0.56107	NaN	NaN	43.234	NaN	NaN	6979600	4841500	2138100	2542200	1942400	599810	2430700	1769100	661580	2006700	1130000	876670
P35580;P35580-5;P35580-2;P35580-3;P35580-4;E7ERA5	P35580;P35580-5;P35580-2;P35580-3;P35580-4	36;36;36;36;36;3	25;25;25;25;25;1	24;24;24;24;24;1	Myosin-10	MYH10	229	1976	1976;1985;1992;1997;2007;187	0	244.68	0.44125	0.70205	47.955	1.0786	0.34458	2.3064	1.8314	0.6184	2.4727	29.437	46.778	49.406	64202000	38102000	26100000	4357400	2304200	2053100	47024000	32936000	14088000	12821000	2861800	9959000
Q13011	Q13011	2	2	2	Delta(3,5)-Delta(2,4)-dienoyl-CoA isomerase, mitochondrial	ECH1	35.816	328	328	0	5.4226	0.41613	0.70271	9.4055	NaN	0.44002	NaN	NaN	0.71509	NaN	NaN	2.47	NaN	6036400	4301000	1735300	2631600	2000600	630960	3404800	2300400	1104400	0	0	0
P16152;E9PQ63;A8MTM1;P16152-2	P16152;E9PQ63;A8MTM1;P16152-2	8;4;4;4	8;4;4;4	6;2;2;2	Carbonyl reductase [NADPH] 1	CBR1	30.375	277	277;178;222;173	0	131.87	0.53082	0.70353	19.676	0.33121	0.62429	0.61719	0.74293	1.0167	0.66018	17.672	20.758	16.343	56102000	36961000	19141000	10109000	7064600	3044600	16761000	10824000	5936400	29232000	19072000	10160000
P49748-2;P49748;P49748-3;K7EJW8;K7EQP4;J3KS89;G3V1M7;J3QKU9	P49748-2;P49748;P49748-3;K7EJW8;K7EQP4	6;6;6;3;3;2;2;1	6;6;6;3;3;2;2;1	6;6;6;3;3;2;2;1	Very long-chain specific acyl-CoA dehydrogenase, mitochondrial	ACADVL	68.058	633	633;655;678;157;224;76;282;155	0	12.908	0.46077	0.70372	12.785	0.27974	0.48086	0.61516	0.62731	0.77806	0.65199	25.226	15.618	7.0284	25256000	16346000	8910100	7308200	5533200	1775000	3812600	2701300	1111300	14135000	8111400	6023800
Q03135;E9PCT5;C9JKI3;Q03135-2	Q03135;E9PCT5;C9JKI3;Q03135-2	6;4;3;3	6;4;3;3	6;4;3;3	Caveolin-1;Caveolin	CAV1	20.471	178	178;167;138;147	0	112.73	0.46021	0.70398	12.714	0.24846	0.44965	0.69902	0.66722	0.78041	0.71098	11.104	2.9088	32.523	189230000	126130000	63107000	19844000	15551000	4292400	65852000	45032000	20820000	103540000	65543000	37994000
P22102-2;P22102;F8WD69;C9JZG2;C9JKQ7;C9JBJ1;C9JTV6	P22102-2;P22102;F8WD69	3;3;2;1;1;1;1	3;3;2;1;1;1;1	3;3;2;1;1;1;1	Trifunctional purine biosynthetic protein adenosine-3;Phosphoribosylamine--glycine ligase;Phosphoribosylformylglycinamidine cyclo-ligase;Phosphoribosylglycinamide formyltransferase	GART	46.033	433	433;1010;306;136;138;231;241	0	5.233	0.50835	0.7041	57.578	NaN	0.50835	NaN	NaN	0.7041	NaN	NaN	27.798	NaN	2434900	1480200	954680	511330	409940	101390	1229100	783550	445550	694480	286730	407750
X6R6Z1;A0A0A0MRL0;B4DY09;Q12905	X6R6Z1;A0A0A0MRL0;B4DY09;Q12905	2;2;2;2	2;2;2;2	2;2;2;2	Interleukin enhancer-binding factor 2	ILF2	12.382	115	115;150;352;390	0	3.702	0.40388	0.70514	7.6539	0.35266	0.41622	NaN	0.71827	0.67833	NaN	16.006	2.1723	NaN	6722300	4237000	2485300	2377900	1743700	634130	3230900	1889400	1341500	1113600	603880	509690
P14866;M0QXS5;A0A3B3ITJ4;P14866-2;M0R076;B4DVF8;M0R1W6;M0QYT0	P14866;M0QXS5;A0A3B3ITJ4;P14866-2	3;2;2;2;1;1;1;1	3;2;2;2;1;1;1;1	3;2;2;2;1;1;1;1	Heterogeneous nuclear ribonucleoprotein L	HNRNPL	64.132	589	589;530;537;456;114;179;220;321	0	40.154	0.49372	0.70571	32.936	0.35142	NaN	NaN	0.67105	NaN	NaN	4.0242	NaN	NaN	4174400	2739600	1434800	1690500	1321000	369580	1235400	608060	627330	1248500	810580	437870
Q07812-5;Q07812-8;Q07812;Q07812-2;Q07812-7;K4JQN1;Q07812-4	Q07812-5;Q07812-8;Q07812;Q07812-2;Q07812-7	3;3;3;3;2;1;1	3;3;3;3;2;1;1	3;3;3;3;2;1;1	Apoptosis regulator BAX	BAX	18.129	164	164;179;192;218;173;175;143	0	6.5306	0.49974	0.70587	59.508	0.16066	NaN	1.0487	0.36591	NaN	1.097	19.225	NaN	40.589	4751300	3492300	1259000	2772300	2286100	486200	648950	515130	133810	1330000	691030	639000
D6R956;P09936;D6R974;D6RE83;D6RF53	D6R956;P09936;D6R974;D6RE83	5;5;4;4;1	5;5;4;4;1	5;5;4;4;1	Ubiquitin carboxyl-terminal hydrolase;Ubiquitin carboxyl-terminal hydrolase isozyme L1	UCHL1	26.839	241	241;223;156;207;58	0	20.383	0.59121	0.70624	19.506	0.3418	0.60258	0.60377	0.85208	1.0665	0.60692	25.502	34.022	10.573	148340000	99028000	49315000	26365000	19503000	6861500	31480000	19906000	11574000	90499000	59619000	30880000
G3V213;F8VZG5;A0A5F9ZHP2;F8W1A4;P54819-4;P54819-6;P54819-3;P54819-5;P54819-2;P54819;F8VY04;A0A5K1VW67	G3V213;F8VZG5;A0A5F9ZHP2;F8W1A4;P54819-4;P54819-6;P54819-3;P54819-5;P54819-2;P54819;F8VY04;A0A5K1VW67	2;2;2;2;2;2;2;2;2;2;1;1	2;2;2;2;2;2;2;2;2;2;1;1	2;2;2;2;2;2;2;2;2;2;1;1	Adenylate kinase 2, mitochondrial;Adenylate kinase 2, mitochondrial;Adenylate kinase 2, mitochondrial, N-terminally processed	AK2	14.324	133	133;162;162;232;130;191;202;224;232;239;190;197	0.0015186	1.788	0.43638	0.70776	8.6155	NaN	NaN	NaN	NaN	NaN	NaN	NaN	NaN	NaN	909180	600840	308340	486220	328720	157500	422960	272120	150840	0	0	0
Q9UBT2-2;Q9UBT2;K7ESK7;K7EPL2	Q9UBT2-2;Q9UBT2;K7ESK7;K7EPL2	2;2;1;1	2;2;1;1	2;2;1;1	SUMO-activating enzyme subunit 2	UBA2	60.838	544	544;640;215;262	0	2.3857	0.45312	0.71029	9.7468	NaN	NaN	NaN	NaN	NaN	NaN	NaN	NaN	NaN	910490	653410	257080	378730	268920	109800	531770	384490	147280	0	0	0
H7C3P4;F6S8M0;P15586-2;P15586;H0YFA9;F5H4C6	H7C3P4;F6S8M0;P15586-2;P15586;H0YFA9;F5H4C6	4;4;4;4;3;2	4;4;4;4;3;2	4;4;4;4;3;2	N-acetylglucosamine-6-sulfatase	GNS	56.374	496	496;584;532;552;303;247	0	5.1784	0.4663	0.71061	15.507	0.39951	0.35123	0.66485	0.7971	0.6068	0.71061	34.555	35.927	17.202	19927000	13472000	6455000	4072000	2608200	1463700	8406800	6299100	2107700	7448200	4564700	2883500
F5H3X6;F5GY37;Q99623;A0A7I2V5F0;J3KPX7;Q99623-2;F5H2D2;A0A3G2KQ93;U3KPZ5;F5H0C5;F5GWA7	F5H3X6;F5GY37;Q99623;A0A7I2V5F0;J3KPX7;Q99623-2	3;3;3;2;2;2;1;1;1;1;1	3;3;3;2;2;2;1;1;1;1;1	3;3;3;2;2;2;1;1;1;1;1	Prohibitin-2	PHB2	27.437	247	247;267;299;219;255;261;87;91;103;112;261	0	5.3744	0.57509	0.71114	100.53	NaN	NaN	0.57509	NaN	NaN	0.60021	NaN	NaN	72.476	26486000	9730500	16756000	2010700	1439600	571100	5841300	1172700	4668700	18634000	7118200	11516000
A0A2R8Y484;Q08722-2;Q08722-3;Q08722-4;Q08722	A0A2R8Y484;Q08722-2;Q08722-3;Q08722-4;Q08722	2;2;2;2;2	2;2;2;2;2	2;2;2;2;2	Leukocyte surface antigen CD47	CD47	20.313	183	183;292;305;311;323	0	3.5977	0.46878	0.7113	47.69	0.37245	0.35751	0.81283	0.92384	0.60568	0.86096	51.466	37.224	72.742	28339000	18646000	9692800	7882100	5504400	2377600	10906000	7986100	2920300	9550600	5155700	4394900
P55268;F5H520	P55268	8;1	8;1	8;1	Laminin subunit beta-2	LAMB2	195.98	1798	1798;151	0	9.774	0.4398	0.71135	28.164	0.27285	0.7089	NaN	0.53587	0.94428	NaN	62.582	6.2539	NaN	3317300	2441300	875940	2224000	1858200	365760	1093300	583120	510180	0	0	0
Q12906-5;Q12906-4;Q12906-2;Q12906-6;Q12906-3;Q12906;Q12906-7;K7EKY0;K7ER69;K7EQR9;K7EKJ9	Q12906-5;Q12906-4;Q12906-2;Q12906-6;Q12906-3;Q12906;Q12906-7;K7EKY0;K7ER69;K7EQR9;K7EKJ9	2;2;2;2;2;2;2;1;1;1;1	2;2;2;2;2;2;2;1;1;1;1	2;2;2;2;2;2;2;1;1;1;1	Interleukin enhancer-binding factor 3	ILF3	74.606	690	690;698;702;706;764;894;898;158;161;180;254	0.0008	2.0474	0.53745	0.71172	6.7313	NaN	NaN	NaN	NaN	NaN	NaN	NaN	NaN	NaN	2074000	1314400	759630	0	0	0	1688400	1086900	601500	385560	227430	158130
O60493-2;O60493-4;O60493	O60493-2;O60493-4;O60493	1;1;1	1;1;1	1;1;1	Sorting nexin-3	SNX3	14.766	130	130;140;162	0	5.4045	0.68456	0.71173	32.423	NaN	NaN	NaN	NaN	NaN	NaN	NaN	NaN	NaN	5100500	3251400	1849100	1299400	982280	317110	1749100	1060200	688930	2052000	1208900	843100
A0A804HKU2;A0A2R8YD50;E7EPL9;P51659-3;P51659;P51659-2;E7ER27;A0A804HK65;A0A804HIR1;A0A2R8Y7L2;E7ET17;A0A2R8YDT8;A0A2R8YF45;A0A804HK88;A0A804HKB5	A0A804HKU2;A0A2R8YD50;E7EPL9;P51659-3;P51659;P51659-2;E7ER27;A0A804HK65;A0A804HIR1;A0A2R8Y7L2;E7ET17	5;5;5;5;5;5;4;4;3;3;3;2;2;1;1	5;5;5;5;5;5;4;4;3;3;3;2;2;1;1	5;5;5;5;5;5;4;4;3;3;3;2;2;1;1	Peroxisomal multifunctional enzyme type 2;(3R)-hydroxyacyl-CoA dehydrogenase;Enoyl-CoA hydratase 2	HSD17B4	67.047	621	621;711;713;718;736;761;500;712;484;589;599;166;172;144;173	0	11.165	0.39276	0.71268	31.317	0.40456	0.36959	NaN	0.92721	0.57702	NaN	24.796	14.71	NaN	12306000	7444900	4860600	4477400	3158300	1319200	5481000	3483000	1998000	2347200	803670	1543500
A0A6Q8PEX7;A0A6Q8PH31;B4DT28;O43390-4;O43390-3;O43390;O43390-2;A0A6Q8PH35;A0A6Q8PHG0	A0A6Q8PEX7;A0A6Q8PH31;B4DT28;O43390-4;O43390-3;O43390;O43390-2;A0A6Q8PH35	3;3;3;3;3;3;3;2;1	1;1;1;1;1;1;1;1;0	1;1;1;1;1;1;1;1;0	Heterogeneous nuclear ribonucleoprotein R	HNRNPR	26.741	238	238;279;494;535;595;633;636;481;186	0	6.5002	0.37687	0.71288	10.65	NaN	NaN	NaN	NaN	NaN	NaN	NaN	NaN	NaN	4155100	2856000	1299100	923860	575460	348400	1635400	1210000	425390	1595800	1070500	525270
H0YJD3;O14744-4;O14744-3;O14744-5;O14744-2;O14744	H0YJD3;O14744-4;O14744-3;O14744-5;O14744-2;O14744	1;1;1;1;1;1	1;1;1;1;1;1	1;1;1;1;1;1	Protein arginine N-methyltransferase 5;Protein arginine N-methyltransferase 5, N-terminally processed	PRMT5	20.159	177	177;466;576;593;620;637	0	3.0311	0.39659	0.71471	25.01	NaN	NaN	NaN	NaN	NaN	NaN	NaN	NaN	NaN	1595400	1127800	467610	359440	262490	96953	566270	411840	154430	669670	453440	216230
A0FGR8-2;A0A499FIX8;H7BXI1;A0A087WXU3;A0FGR8;A0FGR8-6;A0FGR8-4;A0FGR8-5	A0FGR8-2;A0A499FIX8;H7BXI1;A0A087WXU3;A0FGR8;A0FGR8-6;A0FGR8-4	7;6;6;5;5;5;4;3	7;6;6;5;5;5;4;3	7;6;6;5;5;5;4;3	Extended synaptotagmin-2	ESYT2	98.9	893	893;845;866;921;921;942;527;328	0	8.7929	0.59768	0.71622	31.629	0.6149	0.45131	0.67671	1.2554	0.66017	0.71622	164.47	17.054	2.1888	10847000	6529100	4317800	2994700	1611800	1382900	4835700	3296100	1539600	3016600	1621300	1395300
E9PB61;Q86V81	E9PB61;Q86V81	3;3	3;3	3;3	THO complex subunit 4	ALYREF	27.557	264	264;257	0	4.0741	0.54549	0.71737	30.644	0.4775	NaN	NaN	0.87578	NaN	NaN	34.06	NaN	NaN	2450100	1834600	615430	1429100	1059000	370140	1020900	775630	245280	0	0	0
E9PBS1;P22234;P22234-2;D6RF62	E9PBS1;P22234;P22234-2;D6RF62	5;5;5;3	5;5;5;3	4;4;4;3	Multifunctional protein ADE2;Phosphoribosylaminoimidazole-succinocarboxamide synthase;Phosphoribosylaminoimidazole carboxylase	PAICS	45.651	413	413;425;432;333	0	35.362	0.67638	0.71738	36.905	NaN	NaN	0.91337	NaN	NaN	0.95965	NaN	NaN	31.219	8669400	4839900	3829500	573140	442290	130850	860330	564080	296250	7235900	3833500	3402400
O75874;C9J4N6;C9JJE5;C9JLU6	O75874	8;3;1;1	8;3;1;1	7;2;1;1	Isocitrate dehydrogenase [NADP] cytoplasmic	IDH1	46.659	414	414;157;62;73	0	13.286	0.37439	0.71745	47.132	0.33042	0.4331	0.37439	0.92075	0.71283	0.40291	36.292	11.977	32.55	43294000	29641000	13653000	8908000	6022100	2885900	10556000	7121800	3434600	23830000	16497000	7332600
D6REX3;O94979-3;O94979-9;O94979-2;O94979;O94979-8;H7BXG7;O94979-7;O94979-6;O94979-10;O94979-4;D6RHZ5;H0Y8W8;H0YAB3;H0Y9K1;H0Y8V7	D6REX3;O94979-3;O94979-9;O94979-2;O94979;O94979-8;H7BXG7;O94979-7;O94979-6;O94979-10;O94979-4;D6RHZ5	5;5;5;5;5;5;4;4;4;4;4;3;2;2;1;1	5;5;5;5;5;5;4;4;4;4;4;3;2;2;1;1	5;5;5;5;5;5;4;4;4;4;4;3;2;2;1;1	Protein transport protein Sec31A	SEC31A	136.22	1251	1251;1106;1200;1205;1220;1233;969;969;1067;1166;1181;877;383;443;237;285	0	7.5456	0.56075	0.71748	69.949	NaN	NaN	1.209	NaN	NaN	1.2739	NaN	NaN	85.046	6724600	3484400	3240200	0	0	0	1513800	977120	536680	5210800	2507300	2703500
E9PKZ0;P62917;E9PP36;G3V1A1;E9PKU4	E9PKZ0;P62917;E9PP36;G3V1A1;E9PKU4	2;2;1;1;1	2;2;1;1;1	2;2;1;1;1	60S ribosomal protein L8	RPL8	22.389	205	205;257;148;167;235	0	3.7673	0.35701	0.71752	80.988	NaN	0.47099	0.39499	NaN	0.82033	0.39063	NaN	40.179	136.63	53012000	37742000	15270000	3576600	2428800	1147800	10618000	6983000	3634700	38817000	28330000	10488000
Q5URX0;P07686;H0Y9B6;H0YA83	Q5URX0;P07686;H0Y9B6;H0YA83	4;4;3;2	4;4;3;2	4;4;3;2	Beta-hexosaminidase subunit beta;Beta-hexosaminidase subunit beta chain B;Beta-hexosaminidase subunit beta chain A	HEXB	38.258	331	331;556;202;170	0	3.7469	0.41674	0.71766	39.436	0.48543	NaN	NaN	0.95638	NaN	NaN	31.324	NaN	NaN	5091700	3445700	1646000	2046800	1248400	798420	2527800	1819300	708550	517060	378010	139050
P62070;P62070-4;P62070-3;E9PK85;P62070-2	P62070;P62070-4;P62070-3;E9PK85;P62070-2	4;4;3;2;2	2;2;2;1;2	2;2;2;1;2	Ras-related protein R-Ras2	RRAS2	23.399	204	204;210;169;166;127	0	98.159	0.60761	0.7178	47.275	0.30689	0.58954	NaN	0.72146	0.95607	NaN	79.014	41.634	NaN	20871000	14250000	6621300	3310200	2435000	875220	13762000	9693800	4068200	3798800	2120800	1678000
Q9UBG0;E7EME3	Q9UBG0	6;1	6;1	6;1	C-type mannose receptor 2	MRC2	166.67	1479	1479;345	0	7.9197	0.44455	0.71827	5.2006	0.3699	0.4212	NaN	0.71224	0.76369	NaN	99.071	34.892	NaN	41996000	28801000	13195000	16089000	12342000	3747200	25005000	16047000	8958700	902020	412990	489030
A0A0U1RR32;A0A0U1RRH7;Q99878;Q96KK5;Q9BTM1;Q16777;Q93077;Q7L7L0;Q6FI13;P20671;P0C0S8;P04908;H0YFX9;A0A3B3IS11;Q96QV6;P16104;Q9BTM1-2;Q8IUE6;REV__H0Y672;REV__E7EQ67;REV__H7BY63;REV__Q8NB25-4;REV__H0YBA5;REV__Q8NB25-2;REV__A0A087X2A7;REV__Q8NB25-3;REV__Q8NB25;Q71UI9-5	A0A0U1RR32;A0A0U1RRH7;Q99878;Q96KK5;Q9BTM1;Q16777;Q93077;Q7L7L0;Q6FI13;P20671;P0C0S8;P04908;H0YFX9;A0A3B3IS11;Q96QV6;P16104;Q9BTM1-2;Q8IUE6	4;4;4;4;4;4;4;4;4;4;4;4;3;3;3;3;3;2;1;1;1;1;1;1;1;1;1;1	4;4;4;4;4;4;4;4;4;4;4;4;3;3;3;3;3;2;1;1;1;1;1;1;1;1;1;1	2;2;2;2;2;2;2;2;2;2;2;2;2;1;1;1;1;1;1;1;1;1;1;1;1;1;1;0	Histone H2A type 1-J;Histone H2A type 1-H;Histone H2A.J;Histone H2A type 2-C;Histone H2A type 1-C;Histone H2A type 3;Histone H2A type 2-A;Histone H2A type 1-D;Histone H2A type 1;Histone H2A type 1-B/E;Histone H2A;Histone H2A type 1-A;Histone H2AX;Histone H2A type 2-B	HIST1H2AJ;HIST1H2AH;H2AFJ;HIST2H2AC;HIST1H2AC;HIST3H2A;HIST2H2AA3;HIST1H2AD;HIST1H2AG;HIST1H2AB;HIST1H2AA;H2AFX;HIST2H2AB	18.481	169	169;170;128;128;129;129;130;130;130;130;130;130;92;140;131;143;151;130;141;529;936;971;996;1056;1098;1116;1140;66	0	111.79	0.35517	0.71828	40.687	0.44915	0.32459	NaN	1.1324	0.48985	NaN	28.31	30.667	NaN	263900000	192100000	71806000	87891000	61453000	26438000	131000000	98135000	32866000	45012000	32510000	12502000
H3BQZ9;P07741-2;P07741;H3BQB1;H3BSW3;H3BQF1	H3BQZ9;P07741-2;P07741;H3BQB1;H3BSW3;H3BQF1	4;4;4;3;2;2	4;4;4;3;2;2	4;4;4;3;2;2	Adenine phosphoribosyltransferase	APRT	16.616	153	153;134;180;162;63;148	0	4.7237	0.49188	0.71852	9.2096	NaN	0.46753	0.62614	NaN	0.75677	0.67042	NaN	7.3334	11.777	12509000	7871700	4637100	1187500	869760	317760	4991000	3238100	1752900	6330300	3763800	2566500
P49755;G3V2K7	P49755;G3V2K7	4;2	4;2	4;2	Transmembrane emp24 domain-containing protein 10	TMED10	24.976	219	219;153	0	11.119	0.3293	0.71862	29.649	0.33139	0.32721	1.0069	0.71862	0.53196	1.0725	20.442	49.392	35.78	21695000	14077000	7618500	10525000	7534600	2990600	7107600	4646000	2461600	4062300	1896000	2166300
Q00839;A0A1X7SBS1;Q5RI18;A0A1W2PRZ7;A0A1W2PQ74;A0A1W2PQL0;A0A1W2PP34;A0A1W2PPL4;A0A1W2PPH7;A0A1W2PQD4;A0A1W2PRI6;A0A1W2PP22	Q00839;A0A1X7SBS1;Q5RI18;A0A1W2PRZ7;A0A1W2PQ74;A0A1W2PQL0;A0A1W2PP34;A0A1W2PPL4;A0A1W2PPH7	10;8;6;5;5;5;5;5;5;3;1;1	10;8;6;5;5;5;5;5;5;3;1;1	1;0;0;0;0;0;0;0;0;0;0;0	Heterogeneous nuclear ribonucleoprotein U	HNRNPU	90.583	825	825;744;602;302;372;527;546;547;549;327;128;181	0	41.245	0.37762	0.71889	21.397	0.33426	0.38646	0.72532	0.72817	0.62986	0.77086	25.675	16.881	18.301	46802000	34980000	11822000	20951000	17571000	3380300	15697000	11411000	4286500	10153000	5998700	4154700
A0A1W2PRU0;A6NMQ3;Q5T5H1;O43768-8;O43768-2;O43768;O43768-9;O43768-3;O43768-4	A0A1W2PRU0;A6NMQ3;Q5T5H1;O43768-8;O43768-2;O43768;O43768-9;O43768-3;O43768-4	1;1;1;1;1;1;1;1;1	1;1;1;1;1;1;1;1;1	1;1;1;1;1;1;1;1;1	Alpha-endosulfine	ENSA	13.133	119	119;140;187;105;117;121;133;137;140	0	12.909	0.4593	0.71924	19.232	NaN	0.44114	NaN	NaN	0.63611	NaN	NaN	17.37	NaN	2826700	1905700	920990	0	0	0	1628100	1277400	350730	1198600	628310	570260
A0A0U1RQQ4;Q9UNN8;A0A0U1RRC4	A0A0U1RQQ4;Q9UNN8;A0A0U1RRC4	2;2;1	2;2;1	2;2;1	Endothelial protein C receptor	PROCR	24.284	213	213;238;34	0	11.525	0.31263	0.71942	44.522	0.18002	NaN	NaN	0.34696	NaN	NaN	51.476	NaN	NaN	4274800	3123300	1151600	1800900	1354900	446010	1648000	1193500	454530	825880	574870	251010
P23634-5;P23634-4;P23634-3;P23634-2;P23634-7;P23634-6;P23634-8;P23634;H0YDG5;H7BZS8;H7BY13	P23634-5;P23634-4;P23634-3;P23634-2;P23634-7;P23634-6;P23634-8;P23634	12;12;12;12;12;12;12;12;1;1;1	12;12;12;12;12;12;12;12;1;1;1	8;8;8;8;8;8;8;8;1;1;1	Plasma membrane calcium-transporting ATPase 4	ATP2B4	124.01	1122	1122;1134;1158;1170;1193;1205;1229;1241;102;117;129	0	125.13	0.39498	0.72007	31.59	0.24735	0.38863	1.3517	0.54501	0.62689	1.4133	27.69	16.263	30.404	89720000	55221000	34499000	22062000	16871000	5191600	38586000	26106000	12480000	29072000	12244000	16828000
A0A7I2V488;A0A7I2V6B9;A0A7I2V2S3;A0A7I2V2H0;A0A7I2V3W6;A0A7I2V2Y6;A0A7I2V461;O14980;A0A7I2YQX3;A0A7I2V4A3;A0A7I2V3N0;A0A7I2V3P3;A0A7I2YQV4	A0A7I2V488;A0A7I2V6B9;A0A7I2V2S3;A0A7I2V2H0;A0A7I2V3W6;A0A7I2V2Y6;A0A7I2V461;O14980;A0A7I2YQX3;A0A7I2V4A3;A0A7I2V3N0;A0A7I2V3P3;A0A7I2YQV4	2;2;2;2;2;2;2;2;1;1;1;1;1	2;2;2;2;2;2;2;2;1;1;1;1;1	2;2;2;2;2;2;2;2;1;1;1;1;1	Exportin-1	XPO1	104.16	904	904;940;952;979;999;1026;1056;1071;677;688;735;941;1007	0	2.7929	0.48072	0.7214	19.429	NaN	0.48072	NaN	NaN	0.7214	NaN	NaN	8.5325	NaN	3956400	2522000	1434400	595960	481900	114060	2060300	1331600	728740	1300100	708560	591550
A0A804CL36;A0A7P0TAQ3;A0A669KAX4;K4DI93;A0A7P0T954;Q13620-1;Q13620;A0A7P0T9R8;A0A7P0TAF9;A0A7P0T9P5;A0A669KBG9;A0A7P0T9D0;A0A7P0T8P8;A0A7P0T9C8;A0A7P0T9L3;Q13620-3;A0A7P0Z4G9;A0A087WWN2;A0A669KAU9;A0A7P0T8W4;A0A0A0MR50;Q13619-2;Q13619	A0A804CL36;A0A7P0TAQ3;A0A669KAX4;K4DI93;A0A7P0T954;Q13620-1;Q13620;A0A7P0T9R8;A0A7P0TAF9;A0A7P0T9P5;A0A669KBG9;A0A7P0T9D0;A0A7P0T8P8;A0A7P0T9C8;A0A7P0T9L3;Q13620-3	3;3;3;3;3;3;3;2;2;2;2;2;2;2;2;2;1;1;1;1;1;1;1	3;3;3;3;3;3;3;2;2;2;2;2;2;2;2;2;1;1;1;1;1;1;1	3;3;3;3;3;3;3;2;2;2;2;2;2;2;2;2;1;1;1;1;1;1;1	Cullin-4B	CUL4B	96.263	844	844;864;897;900;933;895;913;401;446;482;571;656;675;686;780;717;121;174;198;298;667;659;759	0.0007758	1.8864	0.60606	0.72196	11.37	NaN	NaN	NaN	NaN	NaN	NaN	NaN	NaN	NaN	1231000	686250	544720	0	0	0	516890	290870	226020	714080	395390	318700
P17174	P17174	1	1	1	Aspartate aminotransferase, cytoplasmic	GOT1	46.247	413	413	0.0028694	1.5615	0.76922	0.72236	37.639	NaN	NaN	NaN	NaN	NaN	NaN	NaN	NaN	NaN	2767400	1586400	1181000	671960	471170	200780	962140	586650	375490	1133400	528580	604770
Q13177	Q13177	2	2	2	Serine/threonine-protein kinase PAK 2;PAK-2p27;PAK-2p34	PAK2	58.042	524	524	0.0027797	1.4512	0.44179	0.72243	5.3796	NaN	NaN	NaN	NaN	NaN	NaN	NaN	NaN	NaN	5741800	3664600	2077200	380370	312810	67558	2601100	1671400	929720	2760300	1680400	1079900
E9PLR0;E9PLE9;A0A2R8Y6G7;E9PKG6;Q2L696;P80303-2;P80303;E9PJP3;E9PM22	E9PLR0;E9PLE9;A0A2R8Y6G7;E9PKG6;Q2L696;P80303-2;P80303;E9PJP3;E9PM22	2;2;2;2;2;2;2;1;1	2;2;2;2;2;2;2;1;1	2;2;2;2;2;2;2;1;1	Nucleobindin-2;Nesfatin-1	NUCB2;Nucb2	23.186	195	195;198;231;338;390;420;420;69;90	0.0027913	1.4732	0.45605	0.72245	32.73	NaN	NaN	NaN	NaN	NaN	NaN	NaN	NaN	NaN	1515800	986500	529320	654900	406690	248200	860930	579810	281120	0	0	0
F5H7X1;F5H5V4;F5GX23;J3KN29;O00233-2;O00233;O00233-3	F5H7X1;F5H5V4;F5GX23;J3KN29;O00233-2;O00233;O00233-3	2;2;2;2;2;2;1	2;2;2;2;2;2;1	2;2;2;2;2;2;1	26S proteasome non-ATPase regulatory subunit 9	PSMD9	9.4303	85	85;153;179;222;209;223;118	0	2.709	0.47069	0.72277	17.518	NaN	NaN	NaN	NaN	NaN	NaN	NaN	NaN	NaN	891450	644710	246740	350410	259140	91270	541030	385560	155470	0	0	0
O95373	O95373	2	2	2	Importin-7	IPO7	119.52	1038	1038	0	3.6829	0.58329	0.72335	38.479	NaN	NaN	NaN	NaN	NaN	NaN	NaN	NaN	NaN	2128600	1357900	770710	0	0	0	843950	618960	224990	1284700	738980	545720
P30153;B3KQV6;C9J9C1;E9PH38;H0YDG7;P30154-5;P30154-4;P30154;P30154-3;P30154-2	P30153;B3KQV6;C9J9C1	6;5;4;1;1;1;1;1;1;1	6;5;4;1;1;1;1;1;1;1	6;5;4;1;1;1;1;1;1;1	Serine/threonine-protein phosphatase 2A 65 kDa regulatory subunit A alpha isoform	PPP2R1A	65.308	589	589;410;395;132;224;474;556;601;603;667	0	9.2958	0.46322	0.72491	20.996	NaN	0.44536	0.84774	NaN	0.69382	0.88828	NaN	6.1991	9.0988	10294000	6467900	3825900	930330	720220	210100	3263100	2339800	923220	6100400	3407800	2692600
A0A1X7SBZ2;A0A5H1ZRQ2;Q92841;Q92841-1;Q92841-3;Q92841-2;J3KRZ1;J3QRQ7;A0A7I2V5F5;A0A7I2V507;A0A7I2V2S0;A0A0G2JLI4;J3KTA4;P17844-2;P17844	A0A1X7SBZ2;A0A5H1ZRQ2;Q92841;Q92841-1;Q92841-3;Q92841-2	3;3;3;2;2;2;1;1;1;1;1;1;1;1;1	3;3;3;2;2;2;1;1;1;1;1;1;1;1;1	3;3;3;2;2;2;1;1;1;1;1;1;1;1;1	Probable ATP-dependent RNA helicase DDX17	DDX17	80.253	729	729;731;729;650;652;652;166;212;347;406;416;509;614;535;614	0	3.0213	0.67387	0.72506	37.7	NaN	NaN	NaN	NaN	NaN	NaN	NaN	NaN	NaN	2572100	1874700	697440	827630	637330	190300	551880	423850	128030	1192600	813490	379100
I3L3H2;P38919	I3L3H2;P38919	2;2	1;1	1;1	Eukaryotic initiation factor 4A-III;Eukaryotic initiation factor 4A-III, N-terminally processed	EIF4A3	44.511	390	390;411	0.0015038	1.7463	0.42036	0.72556	4.9611	NaN	NaN	NaN	NaN	NaN	NaN	NaN	NaN	NaN	2146600	1597000	549670	925850	705160	220690	1220800	891810	328980	0	0	0
Q9Y2J2-2;A8K968;A0A0A0MRA8;A0A0A0MSA4;Q9Y2J2-4;Q9Y2J2;Q9Y2J2-3;A0A1B0GTF8;A0A0J9YY18;J3QS55;A0A0J9YW31;A0A0J9YW26;J3QRQ6;J3KS70;J3QLU5;J3QS83;J3QKY2;J3KRD1;J3QKK4;J3QR33;J3KT37;A0A0J9YWN0;A0A0J9YWE1;A0A0J9YWS4	Q9Y2J2-2;A8K968;A0A0A0MRA8;A0A0A0MSA4;Q9Y2J2-4;Q9Y2J2;Q9Y2J2-3	13;12;12;11;11;11;8;6;5;4;4;2;1;1;1;1;1;1;1;1;1;1;1;1	11;10;10;9;9;9;6;4;5;2;4;2;1;1;1;1;1;1;1;1;1;1;1;1	11;10;10;9;9;9;6;4;5;2;4;2;1;1;1;1;1;1;1;1;1;1;1;1	Band 4.1-like protein 3;Band 4.1-like protein 3, N-terminally processed	EPB41L3	96.513	865	865;756;918;1046;883;1087;612;571;325;162;183;188;79;90;96;110;113;116;125;127;147;189;194;197	0	49.331	0.46786	0.72581	51.737	0.28316	0.58303	0.36339	0.58315	0.93796	0.37485	49.093	36.089	35.464	19347000	13190000	6157200	2213400	1981200	232220	10560000	6251300	4309200	6572900	4957200	1615800
A0A1B0GUF7;A0A1B0GVH7	A0A1B0GUF7;A0A1B0GVH7	1;1	1;1	1;1			57.282	481	481;501	0	2.9595	0.5376	0.72726	64.063	NaN	NaN	NaN	NaN	NaN	NaN	NaN	NaN	NaN	2416300	1140500	1275700	657800	551550	106260	0	0	0	1758500	588990	1169500
Q99541;Q5SYF5;Q5SYF3;Q5SYF4	Q99541	5;2;1;1	5;2;1;1	5;2;1;1	Perilipin-2	PLIN2	48.075	437	437;125;110;126	0	5.0472	0.46072	0.72906	21.717	0.46072	0.39975	NaN	0.80789	0.59858	NaN	7.9162	21.284	NaN	3167700	2318200	849430	1363300	1024100	339140	1804400	1294100	510290	0	0	0
H0YFI1;F5H479;F5GX19;F5H3Y3;Q6IAA8	H0YFI1;F5H479;F5GX19;F5H3Y3;Q6IAA8	1;1;1;1;1	1;1;1;1;1	1;1;1;1;1	Ragulator complex protein LAMTOR1	LAMTOR1	8.5974	79	79;99;142;160;161	0	2.346	0.5264	0.72923	23.303	NaN	NaN	NaN	NaN	NaN	NaN	NaN	NaN	NaN	4014900	2549000	1465800	877450	621020	256430	1569300	993690	575620	1568100	934330	633770
A0A7I2V4I6;P22626;A0A7I2V4N1;A0A7I2V3P1;A0A7I2V323;P22626-2;A0A7I2V4S4;A0A024RA28;A0A7I2V3P7;A0A087WUI2;A0A7I2V4N0;A0A7I2YQN4	A0A7I2V4I6;P22626;A0A7I2V4N1;A0A7I2V3P1;A0A7I2V323;P22626-2;A0A7I2V4S4;A0A024RA28;A0A7I2V3P7;A0A087WUI2;A0A7I2V4N0	11;11;10;10;10;10;9;9;9;7;6;5	11;11;10;10;10;10;9;9;9;7;6;5	10;10;9;9;9;9;8;8;8;6;5;4	Heterogeneous nuclear ribonucleoproteins A2/B1	HNRNPA2B1;HNRPA2B1	34.259	318	318;353;301;309;333;341;260;301;325;261;158;155	0	87.195	0.48693	0.72928	61.537	0.41756	0.43106	0.55776	1.1264	0.74816	0.60764	68.914	72.752	7.7498	154540000	99616000	54927000	39001000	26153000	12847000	62842000	40215000	22627000	52701000	33248000	19453000
P11413;P11413-3;P11413-2;E7EUI8;E7EM57;E9PD92	P11413;P11413-3;P11413-2;E7EUI8	11;11;11;7;5;4	11;11;11;7;5;4	11;11;11;7;5;4	Glucose-6-phosphate 1-dehydrogenase	G6PD	59.256	515	515;545;561;338;320;256	0	38.666	0.38689	0.7297	23.906	0.25395	0.4686	0.83426	0.57494	0.76413	0.89652	35.491	36.385	28.994	57006000	36958000	20048000	16279000	12050000	4228900	24213000	15978000	8234900	16514000	8929200	7584700
A0A494C1T2;V9GZ78;V9GYY3;F5H2F4;P11586	A0A494C1T2;V9GZ78;V9GYY3;F5H2F4;P11586	2;2;2;2;2	2;2;2;2;2	2;2;2;2;2	C-1-tetrahydrofolate synthase, cytoplasmic;Methylenetetrahydrofolate dehydrogenase;Methenyltetrahydrofolate cyclohydrolase;Formyltetrahydrofolate synthetase;C-1-tetrahydrofolate synthase, cytoplasmic, N-terminally processed	MTHFD1	69.704	644	644;854;922;964;935	0	5.4829	0.73436	0.72988	33.539	NaN	0.55384	NaN	NaN	0.85158	NaN	NaN	45.729	NaN	2811100	1700900	1110100	723640	456860	266790	2087400	1244100	843350	0	0	0
A0A7P0Z4A2;A0A7P0Z4A5;A0A7P0T8D4;A0A7P0T8S8;A0A7P0T8Z2;A0A7P0T8C7;Q9Y5X1;A0A7P0T8Z7;A0A7P0TBI9;A0A7P0T8M2;A0A087WVE4;A0A087WZW2;A0A7P0T8L2	A0A7P0Z4A2;A0A7P0Z4A5;A0A7P0T8D4;A0A7P0T8S8;A0A7P0T8Z2;A0A7P0T8C7;Q9Y5X1;A0A7P0T8Z7;A0A7P0TBI9	9;9;9;9;9;9;9;8;8;4;1;1;1	9;9;9;9;9;9;9;8;8;4;1;1;1	9;9;9;9;9;9;9;8;8;4;1;1;1	Sorting nexin-9	SNX9	65.471	585	585;588;591;625;628;632;595;499;577;270;63;84;122	0	67.039	0.4488	0.73047	42.376	0.77491	0.49291	0.27384	1.9391	0.80291	0.2978	43.61	28.16	63.157	64280000	41865000	22415000	13281000	7303900	5977000	30187000	20163000	10024000	20812000	14398000	6413700
P00390-5;P00390-4;P00390-2;P00390-3;P00390;A0A2R8YF59	P00390-5;P00390-4;P00390-2;P00390-3;P00390;A0A2R8YF59	2;2;2;2;2;1	2;2;2;2;2;1	2;2;2;2;2;1	Glutathione reductase, mitochondrial	GSR	47.267	440	440;469;479;493;522;123	0.00083612	2.2775	0.59051	0.73103	3.6856	NaN	NaN	NaN	NaN	NaN	NaN	NaN	NaN	NaN	967200	677360	289840	0	0	0	406200	283350	122850	561000	394010	166990
Q8N5C1	Q8N5C1	2	2	2	Protein FAM26E	FAM26E	35.17	309	309	0.0028289	1.5077	0.51287	0.73135	41.851	NaN	0.51287	NaN	NaN	0.73135	NaN	NaN	41.851	NaN	1490900	1199000	291920	0	0	0	1490900	1199000	291920	0	0	0
Q92597;A0A7I2ST14;Q92597-3;Q92597-2;E7ESM1;E5RJY1;A0A6Q8PHF2;A0A6Q8PGD3;A0A6Q8PF71;E5RJ98;A0A6Q8PHI0;A0A6Q8PF16;E5RI76;E5RH82;E5RIR1;E5RGM5;E5RK17;E5RIV1;E5RIM2	Q92597;A0A7I2ST14;Q92597-3;Q92597-2;E7ESM1;E5RJY1	7;6;6;6;5;4;1;1;1;1;1;1;1;1;1;1;1;1;1	7;6;6;6;5;4;1;1;1;1;1;1;1;1;1;1;1;1;1	7;6;6;6;5;4;1;1;1;1;1;1;1;1;1;1;1;1;1	Protein NDRG1	NDRG1	42.835	394	394;387;313;328;141;103;21;56;57;95;101;120;133;156;158;165;167;193;216	0	28.226	0.50328	0.73186	18.892	NaN	0.27382	0.87175	NaN	0.47693	0.93026	NaN	28.35	11.185	48596000	31245000	17351000	3345100	2555000	790100	22811000	17516000	5295500	22439000	11174000	11266000
I3L3Q7;I3L3B0;Q07021	I3L3Q7;I3L3B0;Q07021	2;2;2	2;2;2	2;2;2	Complement component 1 Q subcomponent-binding protein, mitochondrial	C1QBP	20.006	177	177;178;282	0	2.5341	0.59155	0.73215	16.901	NaN	NaN	NaN	NaN	NaN	NaN	NaN	NaN	NaN	2059600	1095900	963740	0	0	0	734990	404170	330820	1324600	691690	632920
P31939-2;P31939;F8WEF0;H7C1S2	P31939-2;P31939	7;7;1;1	7;7;1;1	7;7;1;1	Bifunctional purine biosynthesis protein PURH;Phosphoribosylaminoimidazolecarboxamide formyltransferase;IMP cyclohydrolase	ATIC	64.523	591	591;592;84;231	0	84.115	0.52577	0.73223	12.007	0.29812	0.52577	0.78006	0.62903	0.74528	0.83801	19.397	18.578	18.505	28678000	19064000	9613100	10367000	8080700	2286400	8177300	5263800	2913500	10133000	5720100	4413200
P07203;A0A2R8Y6B6;A0A7I2YMD7;A0A7I2UQ36;P07203-2	P07203;A0A2R8Y6B6	3;2;1;1;1	3;2;1;1;1	3;2;1;1;1	Glutathione peroxidase 1	GPX1	22.088	203	203;157;104;170;98	0	4.6028	0.59642	0.73239	1.5968	0.30399	NaN	0.68324	0.62366	NaN	0.73239	4.8662	NaN	1.5968	8619600	5666200	2953300	2510100	1860500	649580	2487900	1686800	801110	3621500	2118900	1502700
J3QL05;J3KP15;Q01130-2;Q01130	J3QL05;J3KP15;Q01130-2;Q01130	1;1;1;1	1;1;1;1	1;1;1;1	Serine/arginine-rich splicing factor 2	SRSF2	15.156	130	130;133;209;221	0	2.4599	0.42943	0.73253	10.424	NaN	NaN	NaN	NaN	NaN	NaN	NaN	NaN	NaN	2046700	1208400	838280	528430	333660	194780	734380	483930	250450	783880	390820	393050
I3L3B4;F8W9H0;E9PLN8;Q9BQB6-3;Q9BQB6-2;Q9BQB6	I3L3B4;F8W9H0;E9PLN8;Q9BQB6-3;Q9BQB6-2;Q9BQB6	1;1;1;1;1;1	1;1;1;1;1;1	1;1;1;1;1;1	Vitamin K epoxide reductase complex subunit 1	VKORC1	11.082	104	104;149;166;92;156;163	0.0015072	1.7586	0.43881	0.73351	41.049	NaN	NaN	NaN	NaN	NaN	NaN	NaN	NaN	NaN	9911300	6120700	3790600	1527600	1274300	253340	3787900	2497800	1290100	4595900	2348600	2247200
E9PFR3;Q14738-3;Q14738-2;Q14738;H0YN84;H0YJ49;H7C5Q9;H0Y8C4;H0YJ75;Q13362-2;Q13362-3;Q13362;Q13362-4;Q13362-5	E9PFR3;Q14738-3;Q14738-2;Q14738;H0YN84;H0YJ49;H7C5Q9;H0Y8C4;H0YJ75;Q13362-2;Q13362-3;Q13362;Q13362-4;Q13362-5	2;2;2;2;1;1;1;1;1;1;1;1;1;1	2;2;2;2;1;1;1;1;1;1;1;1;1;1	2;2;2;2;1;1;1;1;1;1;1;1;1;1	Serine/threonine-protein phosphatase 2A 56 kDa regulatory subunit delta isoform;Serine/threonine-protein phosphatase 2A 56 kDa regulatory subunit gamma isoform	PPP2R5D;PPP2R5C	69.116	594	594;496;570;602;89;151;154;504;553;449;485;524;540;555	0.00077399	1.8833	0.66296	0.73369	9.3264	NaN	NaN	NaN	NaN	NaN	NaN	NaN	NaN	NaN	1787000	956500	830470	408340	237650	170690	569010	355390	213620	809620	363450	446160
D6R917;D6RB13;D6RAY7;D6R9P4;P46926-2;Q8TDQ7-3;Q8TDQ7-2;Q8TDQ7;P46926	D6R917;D6RB13;D6RAY7;D6R9P4;P46926-2;Q8TDQ7-3;Q8TDQ7-2;Q8TDQ7;P46926	1;1;1;1;1;1;1;1;1	1;1;1;1;1;1;1;1;1	1;1;1;1;1;1;1;1;1	Glucosamine-6-phosphate isomerase;Glucosamine-6-phosphate isomerase 1;Glucosamine-6-phosphate isomerase 2	GNPDA1;GNPDA2	15.911	138	138;160;237;274;212;259;275;276;289	0.00077821	1.8934	0.62456	0.73389	32.853	NaN	NaN	NaN	NaN	NaN	NaN	NaN	NaN	NaN	2011200	1298500	712760	371370	316900	54474	756370	530440	225920	883490	451130	432360
A0A2R8YEA7	A0A2R8YEA7	6	1	1			17.471	157	157	0.0007776	1.8891	0.54309	0.73396	55.702	NaN	NaN	NaN	NaN	NaN	NaN	NaN	NaN	NaN	3539500	1648800	1890700	656240	569630	86611	0	0	0	2883200	1079100	1804100
P31153;P31153-2	P31153;P31153-2	4;3	4;3	4;3	S-adenosylmethionine synthase isoform type-2	MAT2A	43.66	395	395;299	0	5.7089	0.40436	0.73553	13.262	NaN	0.43684	NaN	NaN	0.68314	NaN	NaN	13.86	NaN	5460500	3693100	1767400	1308100	944230	363910	4152300	2748900	1403500	0	0	0
P28066;P28066-2	P28066;P28066-2	2;1	2;1	2;1	Proteasome subunit alpha type-5	PSMA5	26.411	241	241;183	0	34.69	0.34391	0.73598	8.0675	0.26703	0.44112	NaN	0.67888	0.75208	NaN	9.4457	1.0859	NaN	11411000	8376400	3034900	4102900	3149900	953040	7308400	5226500	2081900	0	0	0
Q96BJ3;Q96BJ3-3;Q96BJ3-2	Q96BJ3;Q96BJ3-3	4;3;1	4;3;1	4;3;1	Axin interactor, dorsalization-associated protein	AIDA	35.023	306	306;224;141	0	7.1308	0.5545	0.73608	24.364	NaN	0.50291	0.60249	NaN	0.73608	0.65307	NaN	27.808	27.107	8236100	5242300	2993800	650430	434790	215650	4167600	2868400	1299200	3418100	1939100	1479000
A0A6Q8PH20;P20810-9;P20810-10;P20810-7;P20810-6;A0A6Q8PGN6;E9PDE4;E7EVY3;B7Z574;A0A0C4DGB5;P20810-4;P20810-8;P20810;P20810-5;A0A6Q8PFE5;E7ES10;A0A6Q8PGG5;E9PCH5;A0A6Q8PG72;P20810-2;A0A6Q8PFF6;H0Y7F0;H0Y9H6;P20810-3;E7EQ12;H0YD33;E7EQA0;H0YA91;F8W7E0;E9PSG1;D6RGF7;D6RBR1;E7EN75;H0Y944;A0A6Q8PFL0;A0A6Q8PFR3;E7EQK6;A0A0C4DGD1;D6RAA8;D6RC54;A0A6Q8PG40	A0A6Q8PH20;P20810-9;P20810-10;P20810-7;P20810-6;A0A6Q8PGN6;E9PDE4;E7EVY3;B7Z574;A0A0C4DGB5;P20810-4;P20810-8;P20810;P20810-5;A0A6Q8PFE5;E7ES10;A0A6Q8PGG5;E9PCH5;A0A6Q8PG72;P20810-2;A0A6Q8PFF6;H0Y7F0;H0Y9H6;P20810-3;E7EQ12;H0YD33;E7EQA0	14;14;14;14;14;13;12;12;12;12;12;12;12;12;11;11;10;10;10;10;9;8;8;8;7;7;7;6;6;5;4;4;4;4;3;2;2;2;1;1;1	14;14;14;14;14;13;12;12;12;12;12;12;12;12;11;11;10;10;10;10;9;8;8;8;7;7;7;6;6;5;4;4;4;4;3;2;2;2;1;1;1	14;14;14;14;14;13;12;12;12;12;12;12;12;12;11;11;10;10;10;10;9;8;8;8;7;7;7;6;6;5;4;4;4;4;3;2;2;2;1;1;1	Calpastatin	CAST	80.998	754	754;750;769;772;791;704;636;693;694;741;667;686;708;756;615;642;662;673;681;695;609;436;465;590;423;430;431;301;393;304;149;150;156;288;252;94;156;203;78;91;110	0	206.33	0.69031	0.73609	20.516	0.24608	0.60134	0.70216	0.48899	0.96376	0.73574	2.2468	45.745	16.569	77672000	49382000	28291000	13963000	11603000	2360600	29032000	17577000	11455000	34677000	20202000	14475000
P51858-2;P51858;P51858-3	P51858-2;P51858;P51858-3	5;5;5	5;5;5	5;5;5	Hepatoma-derived growth factor	HDGF	25.537	233	233;240;256	0	22.666	0.51946	0.73702	12.004	0.54127	0.44958	0.5904	1.3246	0.68642	0.62497	1.6642	15.916	46.29	22670000	14123000	8547000	3825100	2298600	1526500	9520900	6605000	2915900	9323800	5219100	4104700
A0A7I2V389;E9PLK3;A0A7I2V3W8;P55786-2;P55786;E9PPZ2;A6NEC2;H0YCQ5;E9PJY4;A0A7I2V5D4;E9PPD4;H0YDG0;E9PP11;A0A7I2V604;A6NEC2-3;A6NEC2-2	A0A7I2V389;E9PLK3;A0A7I2V3W8;P55786-2;P55786	6;6;6;6;6;2;2;1;1;1;1;1;1;1;1;1	6;6;6;6;6;2;2;1;1;1;1;1;1;1;1;1	6;6;6;6;6;2;2;1;1;1;1;1;1;1;1;1	Puromycin-sensitive aminopeptidase	NPEPPS	99.554	885	885;915;924;839;919;478;478;65;141;150;163;169;201;295;163;263	0	12.302	0.46695	0.73859	25.386	0.31884	0.43539	0.87215	0.55545	0.66444	0.90889	14.999	14.996	19.127	19341000	11905000	7435000	2775600	2128300	647250	8773800	5447300	3326500	7791100	4329900	3461300
A0A087X0X3;P52272-2;P52272;M0R0Y6;M0QYQ7;M0R0N3;M0R019;M0R2T0;M0QZM1	A0A087X0X3;P52272-2;P52272;M0R0Y6;M0QYQ7;M0R0N3;M0R019;M0R2T0	4;4;4;3;3;3;3;3;1	4;4;4;3;3;3;3;3;1	4;4;4;3;3;3;3;3;1	Heterogeneous nuclear ribonucleoprotein M	HNRNPM	77.569	730	730;691;730;99;219;275;352;357;383	0	64.519	0.43824	0.73924	14.516	0.45235	0.43824	0.60985	1.0527	0.73924	0.64581	45.884	14.516	33.367	20354000	13245000	7109200	4370300	2920300	1450000	8734300	5861900	2872400	7249500	4462600	2786900
Q9BR76	Q9BR76	1	1	1	Coronin-1B	CORO1B	54.234	489	489	0.0027855	1.4669	0.4031	0.73955	32.486	NaN	NaN	NaN	NaN	NaN	NaN	NaN	NaN	NaN	3015900	2013400	1002600	1098600	822270	276330	1917300	1191100	726220	0	0	0
P13797;A0A0A0MSQ0;P13797-2;P13797-3;U3KQI3;H7C4N2;P13796;Q14651;Q5TBN3;C9JAM8	P13797;A0A0A0MSQ0;P13797-2;P13797-3	19;18;18;17;6;5;3;3;2;2	19;18;18;17;6;5;3;3;2;2	19;18;18;17;6;5;3;3;2;2	Plastin-3	PLS3	70.81	630	630;617;617;585;164;190;627;629;246;266	0	134.59	0.37373	0.74183	27.951	0.25716	0.33204	0.92177	0.6821	0.56909	0.95559	31.642	21.313	12.662	240490000	138090000	102400000	61047000	29648000	31398000	111200000	76153000	35047000	68241000	32292000	35949000
E9PRB9;E9PL01;A0A087WUC6;E9PI68;Q15005	E9PRB9;E9PL01;A0A087WUC6;E9PI68;Q15005	1;1;1;1;1	1;1;1;1;1	1;1;1;1;1	Signal peptidase complex subunit 2	SPCS2	10.163	87	87;157;227;257;226	0	2.4048	0.54906	0.74245	35.045	NaN	NaN	NaN	NaN	NaN	NaN	NaN	NaN	NaN	1600700	841870	758870	278970	200410	78552	502220	278660	223570	819550	362800	456750
F5H6E2;O00159-2;O00159-3;O00159;I3L501;I3L3Y6;I3L3F5	F5H6E2;O00159-2;O00159-3;O00159	16;16;16;16;3;3;2	16;16;16;16;3;3;2	16;16;16;16;3;3;2	Unconventional myosin-Ic	MYO1C	118.99	1039	1039;1028;1044;1063;168;170;137	0	47.706	0.38009	0.74358	35.006	0.51064	0.34192	1.1445	1.1394	0.58528	1.2215	45.762	10.098	34.46	83324000	50643000	32681000	17126000	8921200	8205200	50554000	34631000	15923000	15643000	7090600	8552300
E5RGM0;H0YBU6;Q86UR5-10;Q86UR5-13;Q86UR5-9;Q86UR5-12;Q86UR5-2;Q86UR5-8;Q86UR5-7;Q86UR5-6;Q86UR5-5;Q86UR5-3;Q86UR5-4;Q86UR5	E5RGM0;H0YBU6;Q86UR5-10;Q86UR5-13;Q86UR5-9;Q86UR5-12;Q86UR5-2;Q86UR5-8;Q86UR5-7;Q86UR5-6;Q86UR5-5;Q86UR5-3;Q86UR5-4;Q86UR5	1;1;1;1;1;1;1;1;1;1;1;1;1;1	1;1;1;1;1;1;1;1;1;1;1;1;1;1	1;1;1;1;1;1;1;1;1;1;1;1;1;1	Regulating synaptic membrane exocytosis protein 1	RIMS1	83.872	753	753;1038;760;817;826;1012;1039;1291;1342;1371;1475;1481;1541;1692	1	-2	0.45649	0.74441	29.585	NaN	NaN	NaN	NaN	NaN	NaN	NaN	NaN	NaN	8212700	5397900	2814800	1451100	1174200	276850	3560700	2472000	1088700	3200900	1751700	1449300
A0A5F9ZHJ1;A0A5K1VW54;A0A5K1VW94;P55263-4;P55263-2;P55263;A0A5F9ZGZ8;A0A5F9ZH72;A0A5F9ZH31;P55263-3	A0A5F9ZHJ1;A0A5K1VW54;A0A5K1VW94;P55263-4;P55263-2;P55263;A0A5F9ZGZ8;A0A5F9ZH72;A0A5F9ZH31;P55263-3	2;2;2;2;2;2;1;1;1;1	2;2;2;2;2;2;1;1;1;1	2;2;2;2;2;2;1;1;1;1	Adenosine kinase	ADK	30.166	270	270;347;356;327;345;362;179;229;294;305	0	4.121	0.53224	0.74467	43.694	NaN	0.4921	0.46229	NaN	0.72975	0.50001	NaN	52.636	18.359	7762700	5407800	2354900	2128000	1790400	337630	4470500	2889100	1581500	1164100	728350	435790
A0A7I2V668;A0A7P0NGZ6;E9PHZ5;P07858;E9PQM1;E9PR21;A0A7I2YQK9;A0A7I2V440;E9PSG5;A0A7I2V4Z9;E9PKQ7;E9PNL5;E9PLY3;A0A7I2V4S6;R4GMQ5;E9PCB3;A0A7I2V302;A0A7I2V2J1;A0A7I2V367	A0A7I2V668;A0A7P0NGZ6;E9PHZ5;P07858;E9PQM1;E9PR21;A0A7I2YQK9;A0A7I2V440;E9PSG5;A0A7I2V4Z9	7;7;7;7;6;6;6;6;4;4;2;2;2;2;1;1;1;1;1	7;7;7;7;6;6;6;6;4;4;2;2;2;2;1;1;1;1;1	7;7;7;7;6;6;6;6;4;4;2;2;2;2;1;1;1;1;1	Cathepsin B;Cathepsin B light chain;Cathepsin B heavy chain	CTSB	29.528	267	267;338;371;339;283;320;324;356;291;323;136;143;165;271;76;110;118;139;192	0	50.814	0.70584	0.74525	17.829	0.75559	0.40121	0.76012	2.196	0.73715	0.78545	18.469	36.777	10.752	299170000	192060000	107110000	19735000	10573000	9162500	200460000	137460000	62999000	78978000	44027000	34951000
P62937;F8WE65;C9J5S7;P62937-2;P0DN26;A0A0H2UH34;A0A0B4J2A2;A0A075B767;A0A075B759;Q9Y536;F5H284;P0DN37;A0A7I2V4V1;A0A7I2V5V0;A0A7I2V2H6;A0A7I2V343;R4GN99;C9JQD4;H0Y548;P30405-2;O43447;P30405;Q08752;P49792	P62937;F8WE65;C9J5S7;P62937-2;P0DN26;A0A0H2UH34;A0A0B4J2A2;A0A075B767;A0A075B759;Q9Y536;F5H284	8;5;5;5;4;4;4;4;4;4;4;3;2;1;1;1;1;1;1;1;1;1;1;1	8;5;5;5;4;4;4;4;4;4;4;3;2;1;1;1;1;1;1;1;1;1;1;1	8;5;5;5;4;4;4;4;4;4;4;3;2;1;1;1;1;1;1;1;1;1;1;1	Peptidyl-prolyl cis-trans isomerase A;Peptidyl-prolyl cis-trans isomerase A, N-terminally processed;Peptidyl-prolyl cis-trans isomerase;Peptidyl-prolyl cis-trans isomerase A-like 4A/B/C;Peptidyl-prolyl cis-trans isomerase A-like 4D	PPIA;PPIAL4C;PPIAL4E;PPIAL4A;PPIAL4D	18.012	165	165;120;121;105;164;164;164;164;164;164;164;164;60;83;92;118;145;151;165;155;177;207;370;3224	0	49.734	0.45432	0.74539	18.258	0.33653	0.44218	0.71676	0.86219	0.74775	0.71161	23.662	29.603	11.746	692400000	436770000	255630000	172470000	118860000	53604000	252260000	167780000	84487000	267660000	150130000	117530000
Q96K17;E9PL10;Q96K17-2	Q96K17;E9PL10;Q96K17-2	2;1;1	2;1;1	2;1;1	Transcription factor BTF3 homolog 4;Transcription factor BTF3	BTF3L4	17.27	158	158;145;100	0	2.795	0.48417	0.7477	6.4351	0.43757	0.52149	NaN	0.71472	0.73557	NaN	6.3811	10.354	NaN	2316800	1663300	653580	635880	464140	171730	1270500	918170	352370	410420	280940	129480
Q15365;J3QT27;E9PFP8;P57721-2;P57721-3;P57721-5;P57721-4;P57721;F8VTZ0;H3BSP4;C9K0A2;F8WC71;C9IZV9;C9J7A9;C9JSA6;C9J5V4;C9JTY5;C9JZY3;C9J0A4;P57723-2;P57723	Q15365	7;3;3;3;3;3;3;3;2;1;1;1;1;1;1;1;1;1;1;1;1	7;3;3;3;3;3;3;3;2;1;1;1;1;1;1;1;1;1;1;1;1	4;0;0;0;0;0;0;0;0;0;0;0;0;0;0;0;0;0;0;0;0	Poly(rC)-binding protein 1	PCBP1	37.497	356	356;322;361;345;346;351;370;371;64;36;46;57;74;86;91;106;124;168;323;360;403	0	112.1	0.43371	0.74856	17.081	0.29589	0.43371	0.94301	0.73053	0.74578	1.0099	52.551	14.477	6.5009	41188000	25705000	15483000	7172700	5053600	2119000	16992000	11448000	5543600	17024000	9203400	7820300
H7BZT7;X6RA14;U3KQT1;P10768	H7BZT7;X6RA14;U3KQT1;P10768	4;4;4;4	4;4;4;4	4;4;4;4	S-formylglutathione hydrolase	ESD	25.368	230	230;253;262;282	0	15.992	0.58219	0.74943	20.984	0.17636	0.40064	1.004	0.40612	0.67308	1.0739	85.991	66.935	8.785	17022000	12065000	4956700	3846000	3428900	417090	7897200	5911200	1986000	5279000	2725300	2553700
Q16778;P33778;P23527;P06899;Q8N257;Q6DRA6;Q6DN03	Q16778;P33778;P23527;P06899;Q8N257	7;7;7;7;6;2;2	2;2;2;2;2;2;2	2;2;2;2;2;2;2	Histone H2B type 2-E;Histone H2B type 1-B;Histone H2B type 1-O;Histone H2B type 1-J;Histone H2B type 3-B	HIST2H2BE;HIST1H2BB;HIST1H2BO;HIST1H2BJ;HIST3H2BB	13.92	126	126;126;126;126;126;164;193	0	2.4152	0.45883	0.75026	117.68	NaN	0.22824	NaN	NaN	0.3709	NaN	NaN	99.629	NaN	9221500	6407200	2814300	2994500	1706100	1288400	6227000	4701200	1525900	0	0	0
P08670;B0YJC4;B0YJC5;A0A1B0GTT5;A0A1B0GVG8;P17661;H7C5W5;CON__P05787;P41219;P41219-2;P05787;P05787-2;A0A1X7SBR3;CON__Q9H552;A0A1W2PR46;CON__Q9NSB2;CON__Q6ISB0;P14136-3;P14136;P14136-2;Q9NSB2;U3KPR1;B4DIR1;K7ELP4;K7EJU1;K7EKH9;F8VUG2;F8W1U3;A0A1W2PRT3;A0A1X7SCE1;CON__H-INV:HIT000292931;E7EMV2;E7ESP9;Q8IWY7;Q16352;P07197-2;P07196;P07197	P08670;B0YJC4	36;34;17;11;7;4;3;3;3;3;3;3;2;2;2;2;2;2;2;2;2;1;1;1;1;1;1;1;1;1;1;1;1;1;1;1;1;1	36;34;17;11;7;4;3;3;3;3;3;3;2;2;2;2;2;2;2;2;2;1;1;1;1;1;1;1;1;1;1;1;1;1;1;1;1;1	31;29;13;10;7;1;0;0;0;0;0;0;1;0;1;0;0;1;1;1;0;0;0;0;0;0;0;0;1;0;0;0;0;0;0;0;0;0	Vimentin	VIM	53.651	466	466;431;228;149;109;470;200;483;470;471;483;511;472;499;505;600;600;431;432;438;600;143;179;189;248;261;273;289;326;334;443;698;877;1649;499;540;543;916	0	323.31	0.64899	0.75086	18.115	0.33097	0.75572	0.65473	0.84683	0.80242	0.53311	18.611	38.74	22.608	21388000000	13073000000	8315200000	4159000000	3110100000	1048900000	6774000000	3848200000	2925800000	10455000000	6114600000	4340500000
P23381-2;P23381;G3V3H8;G3V3Y5;G3V423;G3V5U1;G3V456;H0YJP3;G3V277;G3V4C7;G3V4N8;G3V5W1;G3V3S7;G3V3X0;G3V3P2;G3V227;G3V2Y7	P23381-2;P23381;G3V3H8;G3V3Y5	7;7;4;4;2;2;2;2;2;1;1;1;1;1;1;1;1	7;7;4;4;2;2;2;2;2;1;1;1;1;1;1;1;1	7;7;4;4;2;2;2;2;2;1;1;1;1;1;1;1;1	Tryptophan--tRNA ligase, cytoplasmic;T1-TrpRS;T2-TrpRS	WARS	48.851	430	430;471;223;226;140;153;154;185;212;97;104;107;114;124;150;152;177	0	55.854	0.4714	0.75138	12.239	0.41974	0.40921	0.61762	0.96881	0.64951	0.65823	24.462	14.837	21.835	33561000	22569000	10992000	8547000	6126500	2420500	14219000	9627300	4591500	10795000	6815100	3980200
Q8WZ42-2;A0A0C4DG59;A0A0A0MRA3;A0A0A0MTS7;Q8WZ42-3;Q8WZ42-10;Q8WZ42-9;Q8WZ42-5;Q8WZ42-11;Q8WZ42-4;Q8WZ42-7;Q8WZ42;Q8WZ42-8;Q8WZ42-13;Q8WZ42-12	Q8WZ42-2;A0A0C4DG59;A0A0A0MRA3;A0A0A0MTS7;Q8WZ42-3;Q8WZ42-10;Q8WZ42-9;Q8WZ42-5;Q8WZ42-11;Q8WZ42-4;Q8WZ42-7;Q8WZ42;Q8WZ42-8;Q8WZ42-13;Q8WZ42-12	2;1;1;1;1;1;1;1;1;1;1;1;1;1;1	2;1;1;1;1;1;1;1;1;1;1;1;1;1;1	2;1;1;1;1;1;1;1;1;1;1;1;1;1;1	Titin	TTN	3805.7	34258	34258;213;27118;35991;26926;27051;27118;32900;33423;33445;33615;34350;34475;34484;35991	0.0088272	1.1408	0.64508	0.7519	65.258	0.37083	NaN	NaN	1.0033	NaN	NaN	89.233	NaN	NaN	18126000	12572000	5554200	10281000	7796100	2485000	0	0	0	7844700	4775600	3069100
B3KYB6;B3KYB7;A0A0A0MSW4;P48739;P48739-2;P48739-3	B3KYB6;B3KYB7;A0A0A0MSW4;P48739;P48739-2;P48739-3	2;2;2;2;2;2	2;2;2;2;2;2	2;2;2;2;2;2	Phosphatidylinositol transfer protein beta isoform	PITPNB	13.781	120	120;167;271;271;272;273	0.0083979	1.2004	0.43523	0.75191	25.914	NaN	NaN	NaN	NaN	NaN	NaN	NaN	NaN	NaN	1967600	1440500	527050	871410	678660	192750	1096200	761880	334300	0	0	0
P62330	P62330	3	3	3	ADP-ribosylation factor 6	ARF6	20.082	175	175	0.00083333	2.2606	0.51204	0.75199	38.508	NaN	0.44455	1.1038	NaN	0.7203	1.1783	NaN	25.79	1.9249	10558000	6568600	3989700	0	0	0	6651200	4918000	1733100	3907200	1650600	2256600
A0A087WYT3;Q15185-2;Q15185-3;Q15185-4;Q15185;B4DDC6	A0A087WYT3;Q15185-2;Q15185-3;Q15185-4;Q15185;B4DDC6	2;2;2;2;2;1	2;2;2;2;2;1	2;2;2;2;2;1	Prostaglandin E synthase 3	PTGES3	19.155	164	164;127;130;139;160;124	0.0015408	1.8638	0.5323	0.75393	47.741	0.2927	0.5323	0.59744	0.71795	0.87909	0.65206	59.097	26.02	27.212	20542000	13327000	7214200	4346400	3274200	1072200	6686400	4245800	2440600	9508800	5807400	3701400
C9JZG1;P55884;P55884-2;C9JQN7	C9JZG1;P55884;P55884-2;C9JQN7	2;2;2;1	2;2;2;1	2;2;2;1	Eukaryotic translation initiation factor 3 subunit B	EIF3B	33.382	302	302;814;873;153	0.00083472	2.2655	0.48707	0.7543	15.142	0.39308	NaN	NaN	0.75714	NaN	NaN	25.274	NaN	NaN	5545800	3610000	1935800	1694500	1176000	518520	1477100	1059200	417900	2374100	1374700	999350
O95881	O95881	1	1	1	Thioredoxin domain-containing protein 12	TXNDC12	19.206	172	172	0.007947	1.3023	0.60309	0.75453	21.083	NaN	NaN	NaN	NaN	NaN	NaN	NaN	NaN	NaN	1807600	1011200	796360	0	0	0	778550	519950	258590	1029000	491260	537760
E9PLT0;O75534-2;O75534;O75534-3;O75534-4;E9PNG3	E9PLT0;O75534-2;O75534;O75534-3;O75534-4	4;4;4;4;4;1	4;4;4;4;4;1	4;4;4;4;4;1	Cold shock domain-containing protein E1	CSDE1	74.583	668	668;767;798;813;844;136	0	4.212	0.54446	0.7546	17.74	NaN	NaN	NaN	NaN	NaN	NaN	NaN	NaN	NaN	3375100	2427700	947400	811920	577450	234470	469520	358770	110750	2093700	1491500	602170
P17858;P17858-2;V9GY25	P17858;P17858-2	5;4;1	3;3;0	3;3;0	ATP-dependent 6-phosphofructokinase, liver type	PFKL	85.018	780	780;827;118	0	4.9926	0.35328	0.75505	41.045	0.30873	0.32494	0.86503	0.54121	0.54312	0.92442	31.263	63.097	28.622	10106000	6740500	3365800	3413000	2537100	875900	3568600	2578100	990450	3124700	1625300	1499400
Q969G5;E9PIE3	Q969G5;E9PIE3	2;1	2;1	2;1	Protein kinase C delta-binding protein	PRKCDBP	27.701	261	261;293	0	3.6355	0.7138	0.75609	20.542	0.28709	NaN	0.82142	0.61292	NaN	0.86638	11.775	NaN	12.819	20863000	12043000	8820000	2689900	2051100	638800	3240200	2014000	1226200	14933000	7978100	6955000
A0A7P0T944;A0A7P0T9C0;A0A7P0TBF0;A0A7P0Z4D3;Q92973-2;Q92973;E7EW37;Q92973-3	A0A7P0T944;A0A7P0T9C0;A0A7P0TBF0;A0A7P0Z4D3;Q92973-2;Q92973;E7EW37;Q92973-3	3;3;3;3;3;3;2;2	3;3;3;3;3;3;2;2	3;3;3;3;3;3;2;2	Transportin-1	TNPO1	85.897	756	756;797;858;870;890;898;136;848	0	11.524	0.55666	0.75614	16.459	NaN	0.55666	NaN	NaN	0.87663	NaN	NaN	10.417	NaN	7299800	5257500	2042400	1114000	860200	253840	3157900	2439700	718270	3027800	1957600	1070200
P48507	P48507	1	1	1	Glutamate--cysteine ligase regulatory subunit	GCLM	30.727	274	274	0.00079618	2.0215	0.49986	0.75714	3.8454	NaN	NaN	NaN	NaN	NaN	NaN	NaN	NaN	NaN	3821800	2527400	1294400	877850	601760	276090	1502300	989300	512950	1441700	936320	505340
A0A0A0MRN7;Q6YP21-2;Q6YP21-3;Q6YP21	A0A0A0MRN7;Q6YP21-2;Q6YP21-3;Q6YP21	1;1;1;1	1;1;1;1	1;1;1;1	Kynurenine--oxoglutarate transaminase 3	CCBL2	29.471	262	262;167;420;454	0.0099133	1.0811	0.69746	0.75726	46.14	NaN	NaN	NaN	NaN	NaN	NaN	NaN	NaN	NaN	2615300	1847700	767610	671780	568310	103470	827130	573590	253540	1116300	705750	410590
P23246;P23246-2;H0Y9U2;C9IZL7;H0Y9K7	P23246;P23246-2	4;3;1;1;1	4;3;1;1;1	3;2;1;0;1	Splicing factor, proline- and glutamine-rich	SFPQ	76.149	707	707;669;88;207;223	0	11.142	0.42378	0.75784	13.403	0.36286	0.49494	0.56729	0.72747	0.78948	0.60758	16.029	10.777	26.092	15101000	10112000	4989400	2323700	1669400	654280	3923300	2471700	1451600	8854000	5970500	2883500
Q99536;Q99536-3;K7ERT7;Q99536-2;K7ESA3;K7ENX2;K7EM19;K7EJM4;K7ER81;Q9NQW1-5;Q9NQW1	Q99536;Q99536-3;K7ERT7;Q99536-2	10;9;5;5;3;3;3;1;1;1;1	10;9;5;5;3;3;3;1;1;1;1	10;9;5;5;3;3;3;1;1;1;1	Synaptic vesicle membrane protein VAT-1 homolog	VAT1	41.92	393	393;325;146;259;125;151;154;30;92;1178;1179	0	323.31	0.62614	0.75807	7.9602	0.25753	0.58876	0.70736	0.6513	1.0196	0.74995	18.604	25.478	6.1202	234420000	153000000	81426000	65924000	52268000	13656000	90202000	56052000	34150000	78299000	44679000	33620000
F5H5D3;Q9BQE3;A0A1W2PQM2;F8VVB9;F8VQQ4;F8VRZ4;F8VS66;F8VWV9;F8VX09;A0A7P0TA31;C9K0S6;F8VRK0;A0A7P0Z4A1;F8W0F6	F5H5D3;Q9BQE3;A0A1W2PQM2;F8VVB9	16;16;12;8;7;6;6;5;4;4;2;2;1;1	3;3;2;0;0;0;0;0;0;0;0;0;0;0	3;3;2;0;0;0;0;0;0;0;0;0;0;0	Tubulin alpha-1C chain	TUBA1C;TUBA1B	57.73	519	519;449;325;246;219;112;130;81;75;314;47;49;188;231	0	12.37	0.49618	0.75832	55.005	NaN	0.51106	1.6542	NaN	0.83282	1.7691	NaN	24.096	22.98	13573000	7099800	6472700	2087700	1598100	489590	4180000	2679100	1500900	7304800	2822600	4482200
A0A087X020;Q9Y3A5	A0A087X020;Q9Y3A5	4;4	4;4	4;4	Ribosome maturation protein SBDS	SBDS	28.864	250	250;250	0	3.4255	0.36387	0.7588	19.898	0.33832	NaN	NaN	0.75532	NaN	NaN	4.4892	NaN	NaN	7111400	4606500	2504900	4043200	2878800	1164400	3068200	1727700	1340500	0	0	0
K7EM18;P41567;O60739	K7EM18;P41567;O60739	3;3;2	3;3;2	3;3;2	Eukaryotic translation initiation factor 1;Eukaryotic translation initiation factor 1b	EIF1;EIF1B	13.607	121	121;113;113	0	15.356	0.59437	0.7589	36.105	0.27644	0.6448	0.79424	0.55113	1.0688	0.83567	10.355	31.961	30.095	8771800	5368700	3403100	1822900	1386900	436030	3633600	2286600	1347000	3315400	1695300	1620100
A0A0G2JNZ5;A0A0G2JNZ0;A0A0G2JLB3;P04062-4;P04062-5;P04062-2;P04062	A0A0G2JNZ5;A0A0G2JNZ0;A0A0G2JLB3;P04062-4;P04062-5;P04062-2;P04062	2;2;2;2;2;2;2	2;2;2;2;2;2;2	2;2;2;2;2;2;2	Glucosylceramidase	GBA	50.263	449	449;487;536;449;487;516;536	0	2.5114	0.47763	0.75929	27.559	NaN	NaN	NaN	NaN	NaN	NaN	NaN	NaN	NaN	4157900	2787400	1370400	1513900	961280	552610	1524100	1074700	449450	1119900	751480	368380
Q9NUM4	Q9NUM4	1	1	1	Transmembrane protein 106B	TMEM106B	31.127	274	274	0.0089059	1.1603	0.57358	0.76034	7.1009	NaN	NaN	NaN	NaN	NaN	NaN	NaN	NaN	NaN	30726000	20702000	10023000	0	0	0	16166000	12031000	4135900	14559000	8671800	5887500
P09543-2;P09543	P09543-2;P09543	3;3	3;3	3;3	2,3-cyclic-nucleotide 3-phosphodiesterase	CNP	45.098	401	401;421	0	4.3066	0.70994	0.7612	12.197	NaN	NaN	0.70994	NaN	NaN	0.7612	NaN	NaN	12.197	2635900	1634900	1000900	0	0	0	0	0	0	2635900	1634900	1000900
Q13492-4;Q13492-3;Q13492-2;Q13492-5;Q13492;E9PI56;E9PKP6;E9PLJ8;H0YCY1;H0YEF7;H0YEH1;E5RFU0;E5RHK9;H0YE97;E5RFC6;E5RK51;E5RIJ5;H0YEY8;H0YD48;E5RGY9;E9PDG8;O60641-3;O60641-4;O60641	Q13492-4;Q13492-3;Q13492-2;Q13492-5;Q13492	5;5;5;5;5;2;2;2;2;2;2;1;1;1;1;1;1;1;1;1;1;1;1;1	5;5;5;5;5;2;2;2;2;2;2;1;1;1;1;1;1;1;1;1;1;1;1;1	5;5;5;5;5;2;2;2;2;2;2;1;1;1;1;1;1;1;1;1;1;1;1;1	Phosphatidylinositol-binding clathrin assembly protein	PICALM	59.918	551	551;610;632;645;652;147;148;185;244;302;308;116;120;134;149;150;152;215;264;581;902;600;877;907	0	6.4193	0.47917	0.7613	60.463	0.36783	0.46955	2.0636	0.60854	0.74188	2.2892	40.309	33.469	20.338	11520000	6372700	5147300	941520	747750	193770	6636200	4083600	2552600	3942300	1541300	2401000
Q9Y2A7;Q9Y2A7-2	Q9Y2A7;Q9Y2A7-2	2;2	2;2	2;2	Nck-associated protein 1	NCKAP1	128.79	1128	1128;1134	0	6.0372	0.59776	0.76229	14.507	NaN	NaN	NaN	NaN	NaN	NaN	NaN	NaN	NaN	1918900	1232600	686270	352950	254060	98888	769770	497560	272220	796130	480960	315160
A0A7I2V2R3;A0A7I2V5D8;A0A7I2V402;A0A7I2V4G0;P51991-2;P51991;A0A7I2V4J6;H7C1J8	A0A7I2V2R3;A0A7I2V5D8;A0A7I2V402;A0A7I2V4G0;P51991-2;P51991;A0A7I2V4J6	3;3;3;3;3;3;2;1	3;3;3;3;3;3;2;1	3;3;3;3;3;3;2;1	Heterogeneous nuclear ribonucleoprotein A3	HNRNPA3	35.411	331	331;348;348;396;356;378;377;115	0	58.526	0.47755	0.76388	8.3304	0.37116	0.47755	0.5386	0.90978	0.76388	0.59239	13.913	8.3304	3.0756	25659000	16718000	8941500	7376600	5475800	1900800	8332200	5590100	2742100	9950400	5651800	4298600
Q53TN4-3;Q53TN4	Q53TN4-3;Q53TN4	3;3	3;3	3;3	Cytochrome b reductase 1	CYBRD1	25.087	228	228;286	0	27.524	0.56056	0.76529	17.643	1.0981	0.4476	0.88184	2.9165	0.76529	0.91814	95.402	29.465	29.356	51207000	31650000	19557000	7347900	3241300	4106600	21119000	14647000	6472400	22740000	13762000	8978000
F8VV56;P08962-3;P08962-2;P08962;F8VNT9;F8W022;F8VWK8	F8VV56;P08962-3;P08962-2;P08962;F8VNT9;F8W022;F8VWK8	2;2;2;2;1;1;1	2;2;2;2;1;1;1	2;2;2;2;1;1;1	CD63 antigen;Tetraspanin	CD63	16.021	145	145;156;215;238;133;215;217	0	4.3018	0.70595	0.76548	20.685	NaN	0.37437	NaN	NaN	0.63293	NaN	NaN	15.922	NaN	43415000	26428000	16987000	7462400	5256500	2205900	13380000	9378900	4000800	22573000	11792000	10781000
C9JH19;F8W787;A0A1B0GW44;A0A1B0GV23;A0A1B0GVD5;A0A1B0GWE8;P07339;A0A1B0GU92;A0A1B0GU03;H7C469;A0A1B0GVP3;F8WD96;A0A1B0GVF1	C9JH19;F8W787;A0A1B0GW44;A0A1B0GV23;A0A1B0GVD5;A0A1B0GWE8;P07339;A0A1B0GU92;A0A1B0GU03;H7C469;A0A1B0GVP3	11;10;10;10;10;10;10;9;9;8;8;5;1	11;10;10;10;10;10;10;9;9;8;8;5;1	11;10;10;10;10;10;10;9;9;8;8;5;1	Cathepsin D;Cathepsin D light chain;Cathepsin D heavy chain	CTSD	48.613	451	451;377;405;406;409;410;412;557;582;336;405;276;73	0	27.2	0.65067	0.76593	32.101	0.96883	0.26517	0.84395	2.3757	0.49143	0.87614	47.035	19.101	9.5284	278160000	186440000	91720000	46972000	21896000	25076000	163470000	127260000	36205000	67718000	37279000	30439000
I3L471;I3L4U7;F5GWE5;Q00169	I3L471;I3L4U7;F5GWE5;Q00169	1;1;1;1	1;1;1;1	1;1;1;1	Phosphatidylinositol transfer protein alpha isoform	PITPNA	11.003	98	98;121;270;270	0	4.9874	0.73231	0.76606	19.852	NaN	NaN	NaN	NaN	NaN	NaN	NaN	NaN	NaN	3410500	2249100	1161400	684080	515970	168120	1040000	627130	412820	1686400	1106000	580480
Q9H3P7	Q9H3P7	2	2	2	Golgi resident protein GCP60	ACBD3	60.593	528	528	0	4.1305	0.51786	0.76625	10.469	NaN	NaN	NaN	NaN	NaN	NaN	NaN	NaN	NaN	1819500	1332700	486740	742170	545920	196250	0	0	0	1077300	786800	290500
C9J0K6;P30626-3;P30626-2;P30626;B4DHQ6	C9J0K6;P30626-3;P30626-2;P30626	3;3;3;3;1	3;3;3;3;1	3;3;3;3;1	Sorcin	SRI	17.605	155	155;180;183;198;158	0	25.381	0.65506	0.76708	9.5354	0.093555	0.22202	0.71885	0.22302	0.37308	0.76708	123.45	121.14	8.4989	41942000	34268000	7673500	11964000	10888000	1076500	18702000	16776000	1926000	11276000	6604800	4670900
A0A7I2V3U0;A0A7I2V586;A0A7I2V5T4;A0A7I2V3F1;A2A274;Q99798;A0A7I2V5A1;A0A7I2V614;A0A7I2V4I8;A0A7I2V5W7;A0A7I2V3C8;A0A7I2V6A6;A0A7I2V538;A0A7I2V3U7	A0A7I2V3U0;A0A7I2V586;A0A7I2V5T4;A0A7I2V3F1;A2A274;Q99798;A0A7I2V5A1;A0A7I2V614	7;7;7;7;7;7;6;5;2;2;2;2;2;1	7;7;7;7;7;7;6;5;2;2;2;2;2;1	7;7;7;7;7;7;6;5;2;2;2;2;2;1	Aconitate hydratase, mitochondrial	ACO2	79.014	725	725;747;775;788;805;780;716;731;288;324;324;422;487;160	0	9.6071	0.53396	0.76868	26.664	0.36405	0.70129	0.70022	0.71788	1.0903	0.7318	4.6415	43.561	26.282	7887200	5605700	2281500	4501500	3488500	1013000	1846000	1174200	671870	1539600	943020	596610
Q9H4A4;A6NKB8;C9JMZ3;A0A087WUS4;H7C2T3;A0A087WU27	Q9H4A4;A6NKB8	5;4;2;1;1;1	5;4;2;1;1;1	5;4;2;1;1;1	Aminopeptidase B	RNPEP	72.595	650	650;611;344;151;168;171	0	8.5568	0.50851	0.76908	35.495	0.51995	0.54491	NaN	0.98162	0.84508	NaN	60.132	14.353	NaN	5365700	3554800	1811000	1138200	763360	374800	3175700	2249700	925990	1051900	541720	510190
O75828	O75828	4	2	2	Carbonyl reductase [NADPH] 3	CBR3	30.85	277	277	0	3.1118	0.49903	0.77017	5.8323	NaN	NaN	NaN	NaN	NaN	NaN	NaN	NaN	NaN	4142000	3894900	247030	345000	321540	23457	581100	357520	223580	3215900	3215900	0
C9JIZ6;P07602;P07602-2;P07602-3;Q5BJH1;A0A0J9YXB8	C9JIZ6;P07602;P07602-2;P07602-3;Q5BJH1	7;7;7;7;5;2	7;7;7;7;5;2	7;7;7;7;5;2	Prosaposin;Saposin-A;Saposin-B-Val;Saposin-B;Saposin-C;Saposin-D	PSAP	58.44	527	527;524;526;527;240;167	0	28.848	0.56905	0.77038	36.329	0.63572	0.36307	0.73654	1.3517	0.67417	0.77038	31.154	39.683	19.33	219250000	103010000	116240000	34588000	19949000	14639000	151070000	64604000	86470000	33587000	18456000	15131000
Q9Y6I3-3;Q9Y6I3;Q9Y6I3-1	Q9Y6I3-3;Q9Y6I3;Q9Y6I3-1	3;3;3	3;3;3	3;3;3	Epsin-1	EPN1	57.504	550	550;576;662	0	5.7686	0.41009	0.77064	34.68	NaN	0.41124	NaN	NaN	0.60432	NaN	NaN	44.847	NaN	2508500	1810700	697730	402160	296000	106160	2106300	1514700	591570	0	0	0
P10301;E9PQK5;E9PQC5	P10301	8;1;1	8;1;1	6;0;0	Ras-related protein R-Ras	RRAS	23.48	218	218;47;52	0	23.025	0.44171	0.77208	13.18	0.28812	0.44171	0.8979	0.66642	0.77853	0.94843	22.226	17.032	25.707	65140000	40851000	24289000	13297000	10407000	2890200	31766000	21061000	10705000	20077000	9383400	10694000
A0A140T975;Q9GJ45;A0A1W2PS39;Q5RJ27;A0A140T941;A0A1W2PQS8;A0A140T9Z6;B0UXQ0	A0A140T975;Q9GJ45;A0A1W2PS39;Q5RJ27;A0A140T941;A0A1W2PQS8;A0A140T9Z6;B0UXQ0	7;7;7;7;6;6;6;6	7;7;7;7;6;6;6;6	0;0;0;0;0;0;0;0		HLA-A	34.321	299	299;326;339;365;299;325;342;365	0	109.79	0.34463	0.77234	55.107	0.42502	0.21578	0.82338	0.85315	0.374	0.88005	19.097	94.732	65.965	27251000	18906000	8345500	5108700	3566600	1542200	10110000	8057500	2052600	12033000	7281800	4750700
H7C131;C9JDE9;P09110	H7C131;C9JDE9;P09110	2;2;2	2;2;2	2;2;2	3-ketoacyl-CoA thiolase, peroxisomal	ACAA1	30.222	290	290;383;424	0	3.1719	0.63076	0.77364	8.4186	NaN	NaN	NaN	NaN	NaN	NaN	NaN	NaN	NaN	641940	392200	249740	205160	134530	70636	0	0	0	436770	257670	179100
A0A7P0TB30;A0A7P0T965;A0A7P0T870;A0A7P0TAK7;F5GY55;A0A7P0Z4B9;Q16531;F5GWI0;A0A7P0Z3Z5;Q16531-2	A0A7P0TB30;A0A7P0T965;A0A7P0T870;A0A7P0TAK7;F5GY55;A0A7P0Z4B9;Q16531;F5GWI0;A0A7P0Z3Z5;Q16531-2	2;2;2;2;2;2;2;1;1;1	2;2;2;2;2;2;2;1;1;1	2;2;2;2;2;2;2;1;1;1	DNA damage-binding protein 1	DDB1	114.12	1027	1027;1061;1066;1084;1092;1107;1140;370;1069;451	0	4.6705	0.51071	0.77403	0.18706	0.88878	0.51071	NaN	1.9921	0.78398	NaN	133.88	1.6191	NaN	7836300	4083500	3752800	4405800	1750500	2655300	2412200	1665800	746400	1018300	667140	351130
E7ETK5;A0A7I2YQK5;A0A7I2V2T3;H0Y4R1;P12268	E7ETK5;A0A7I2YQK5;A0A7I2V2T3;H0Y4R1;P12268	4;4;4;4;4	4;4;4;4;4	4;4;4;4;4	Inosine-5-monophosphate dehydrogenase 2	IMPDH2	53.026	489	489;513;522;538;514	0	4.4873	0.42584	0.77407	72.409	0.41231	0.5194	NaN	0.77407	0.8298	NaN	85.794	33.41	NaN	6535300	5059100	1476100	4132300	3430400	701840	2403000	1628700	774300	0	0	0
C9JZ20;P35232;C9JW96;E7ESE2;E9PCW0;P35232-2	C9JZ20;P35232;C9JW96;E7ESE2;E9PCW0;P35232-2	4;4;3;2;2;2	4;4;3;2;2;2	4;4;3;2;2;2	Prohibitin	PHB	23.721	218	218;272;246;202;216;155	0	4.2842	0.57663	0.77415	12.72	NaN	0.65019	0.56674	NaN	1.0534	0.60423	NaN	13.299	12.954	16061000	9543200	6518100	1765900	1400500	365400	6101000	3629900	2471100	8194500	4512900	3681600
Q03252	Q03252	8	7	7	Lamin-B2	LMNB2	69.948	620	620	0	10.177	0.44232	0.77418	41.915	0.41996	0.43846	0.51369	0.83705	1.3634	0.52527	20.429	43.762	24.297	16320000	10722000	5598400	5359000	3792200	1566800	7062300	4467100	2595100	3898800	2462400	1436400
P61081;M0QX69	P61081	4;1	4;1	4;1	NEDD8-conjugating enzyme Ubc12	UBE2M	20.9	183	183;69	0	25.639	0.43087	0.77442	25.048	0.3384	0.51349	NaN	0.66728	0.73096	NaN	21.949	32.748	NaN	5153400	3397700	1755600	2441000	1761800	679200	1483000	989210	493770	1229400	646730	582670
A0A0B4J2A4;P42765;K7EME0	A0A0B4J2A4;P42765;K7EME0	4;4;3	4;4;3	4;4;3	3-ketoacyl-CoA thiolase, mitochondrial	ACAA2	41.601	394	394;397;342	0	40.492	0.57814	0.77577	14.527	0.2531	0.61593	0.6785	0.84999	0.97487	0.75425	36.033	12.783	13.051	23168000	15164000	8004400	5423700	4287300	1136500	6910300	4330100	2580200	10834000	6546200	4287800
P13807-2;P13807	P13807-2;P13807	1;1	1;1	1;1	Glycogen [starch] synthase, muscle	GYS1	76.482	673	673;737	0.00080841	2.1269	0.46153	0.77588	52.66	0.34824	NaN	NaN	0.61841	NaN	NaN	6.5272	NaN	NaN	4094200	2605300	1488900	1330400	957080	373350	1598900	1238000	360930	1164800	410240	754590
B4DJV2;O75390;A0A0C4DGI3;H0YIC4;F8VTT8;F8W4S1;F8W642;F8VZK9;F8VX07;F8VRP1;F8VX68;F8VPF9;F8VPA1;F8W1S4;H0YH82	B4DJV2;O75390;A0A0C4DGI3;H0YIC4;F8VTT8;F8W4S1	4;4;3;2;2;2;1;1;1;1;1;1;1;1;1	4;4;3;2;2;2;1;1;1;1;1;1;1;1;1	3;3;3;2;1;1;1;1;1;1;1;1;1;1;1	Citrate synthase;Citrate synthase, mitochondrial	CS	50.431	453	453;466;400;123;149;178;66;80;114;117;120;140;144;157;190	0	14.244	0.5484	0.77641	29.594	0.33018	0.79001	0.51696	0.73518	1.2804	0.55695	40.161	16.938	13.58	13720000	8699000	5021500	3262900	2549200	713660	5674600	3142100	2532500	4782900	3007600	1775400
P04406;P04406-2;E7EUT5;O14556	P04406;P04406-2;E7EUT5	16;14;13;1	16;14;13;1	16;14;13;1	Glyceraldehyde-3-phosphate dehydrogenase	GAPDH	36.053	335	335;293;260;408	0	323.31	0.42288	0.77658	27.811	0.35375	0.36553	1.0697	0.86555	0.54205	1.1007	19.241	40.902	21.536	5370800000	3454200000	1916600000	1075700000	797510000	278170000	2168700000	1590300000	578350000	2126400000	1066300000	1060100000
P12955-3;P12955-2;P12955;K7ES25;A0A494C165;V9GYE4;A0A494C194	P12955-3;P12955-2;P12955;K7ES25;A0A494C165	3;3;3;2;2;1;1	3;3;3;2;2;1;1	3;3;3;2;2;1;1	Xaa-Pro dipeptidase	PEPD	47.261	429	429;452;493;512;522;55;224	0	26.825	0.481	0.7769	26.822	NaN	0.45364	NaN	NaN	0.69022	NaN	NaN	16.729	NaN	6082300	3646200	2436100	0	0	0	3462000	2299100	1162900	2620300	1347200	1273200
A0A1B0GTL5	A0A1B0GTL5	1	1	1			138.41	1324	1324	0	3.6641	0.58505	0.77692	67.261	NaN	NaN	NaN	NaN	NaN	NaN	NaN	NaN	NaN	945030	502430	442600	186470	126920	59554	276780	168990	107790	481780	206520	275260
Q04446;E9PGM4	Q04446;E9PGM4	8;7	8;7	8;7	1,4-alpha-glucan-branching enzyme	GBE1	80.473	702	702;661	0	38.25	0.43165	0.77767	26.975	0.37744	0.26252	0.73803	1.0179	0.4496	0.77767	12.523	33.16	9.628	92766000	62701000	30065000	10107000	7270600	2836800	50814000	38728000	12086000	31845000	16702000	15142000
M0R192;P30043;A0A2R8Y7Y9;M0QZL1;A0A2R8YEP4	M0R192;P30043;A0A2R8Y7Y9;M0QZL1;A0A2R8YEP4	3;3;2;2;2	3;3;2;2;2	3;3;2;2;2	Flavin reductase (NADPH)	BLVRB	17.16	163	163;206;121;154;245	0	7.0782	0.4501	0.77781	32.974	0.47885	0.45318	NaN	0.99315	0.77781	NaN	31.543	16.867	NaN	16497000	11649000	4848000	4467900	3199600	1268200	10381000	7285800	3095200	1648200	1163600	484630
Q10567-4;Q10567-3;Q10567-2;Q10567;C9J1E7;K7EJ01;H7C034	Q10567-4;Q10567-3;Q10567-2;Q10567;C9J1E7	5;5;5;5;3;1;1	2;2;2;2;1;0;0	2;2;2;2;1;0;0	AP-1 complex subunit beta-1	AP1B1	101.35	919	919;939;942;949;578;164;173	0	3.5379	0.49489	0.77827	62.409	0.4057	0.52115	NaN	0.76697	0.7403	NaN	2.0689	8.1035	NaN	3843500	2205300	1638200	1349700	981700	368050	1394700	763300	631410	1099000	460280	638720
Q9Y281;Q9Y281-3;G3V2U0;F8WDN3	Q9Y281;Q9Y281-3	4;3;1;1	2;1;1;1	2;1;1;1	Cofilin-2	CFL2	18.736	166	166;149;21;58	0	33.671	0.44709	0.7788	64.501	0.2295	0.44123	1.2797	0.5966	0.74367	1.3899	15.003	6.5279	57.111	28371000	15121000	13249000	4378200	3470000	908260	8202600	5730300	2472200	15790000	5920800	9869000
P61978-3;P61978;P61978-2;Q5T6W2;S4R359;S4R457	P61978-3;P61978;P61978-2;Q5T6W2	9;9;9;6;3;2	9;9;9;6;3;2	9;9;9;6;3;2	Heterogeneous nuclear ribonucleoprotein K	HNRNPK	48.562	440	440;463;464;379;100;77	0	117.93	0.46643	0.7794	13.347	0.39707	0.47854	0.63281	1.092	0.76683	0.65709	16.413	26.739	14.629	98687000	63939000	34747000	22338000	16053000	6284900	33975000	23018000	10958000	42373000	24869000	17505000
Q9NZN4;Q9NZN4-2;Q9NZN3-2;Q9NZN3	Q9NZN4;Q9NZN4-2	16;12;1;1	16;12;1;1	15;12;0;0	EH domain-containing protein 2	EHD2	61.161	543	543;407;175;535	0	80.482	0.4329	0.77995	31.494	0.27805	0.42288	0.8957	0.75019	0.73643	0.96204	18.891	45.384	10.312	134350000	84082000	50266000	29287000	21904000	7382900	48473000	32674000	15800000	56587000	29504000	27083000
P27105;F8VSL7;P27105-2	P27105	7;2;2	7;2;2	7;2;2	Erythrocyte band 7 integral membrane protein	STOM	31.73	288	288;168;123	0	46.479	0.43748	0.78022	53.027	0.42329	0.15566	1.0446	0.78022	0.27161	1.1074	46.442	11.664	17.731	39465000	28473000	10991000	6299200	4460800	1838400	22100000	18330000	3770000	11065000	5682100	5382900
Q6NZI2;Q6NZI2-2;Q6NZI2-3	Q6NZI2;Q6NZI2-2	12;7;3	12;7;3	12;7;3	Polymerase I and transcript release factor	PTRF	43.476	390	390;300;198	0	323.31	0.48529	0.78024	17.725	0.28918	0.41706	0.78424	0.75414	0.75476	0.80716	17.244	31.549	17.288	477400000	312520000	164880000	57042000	43322000	13720000	232190000	163410000	68780000	188170000	105790000	82376000
P55060-3;P55060;P55060-4;P55060-2	P55060-3;P55060;P55060-4	7;7;5;2	7;7;5;2	7;7;5;2	Exportin-2	CSE1L	107.78	945	945;971;915;195	0	10.158	0.53219	0.78054	7.0573	0.29576	0.54618	0.75058	0.55608	0.79472	0.78054	58.856	18.776	5.5173	15871000	9390100	6481200	2645900	2044600	601310	3780800	2381400	1399400	9444700	4964200	4480500
Q9Y3I0	Q9Y3I0	3	3	3	tRNA-splicing ligase RtcB homolog	RTCB	55.21	505	505	0	4.2787	0.52964	0.78065	16.936	NaN	0.49665	NaN	NaN	0.80534	NaN	NaN	13.901	NaN	13201000	8790500	4410200	0	0	0	10395000	7312500	3082200	2806100	1478100	1328100
P46063;F5H2L2;F8WA66;F8WD97	P46063;F5H2L2;F8WA66;F8WD97	2;1;1;1	2;1;1;1	2;1;1;1	ATP-dependent DNA helicase Q1	RECQL	73.457	649	649;131;199;211	0.00078989	1.976	0.48206	0.78067	19.444	0.32882	NaN	NaN	0.61327	NaN	NaN	19.179	NaN	NaN	2641800	1872800	768990	1304000	903960	400040	1337800	968820	368950	0	0	0
Q66K74-2;Q66K74;M0R1M7	Q66K74-2;Q66K74	3;3;1	3;3;1	3;3;1	Microtubule-associated protein 1S;MAP1S heavy chain;MAP1S light chain	MAP1S	109.79	1033	1033;1059;120	0	2.6543	0.48882	0.7812	38.172	NaN	NaN	NaN	NaN	NaN	NaN	NaN	NaN	NaN	1398800	870170	528610	571330	406200	165130	827440	463960	363480	0	0	0
Q92882	Q92882	1	1	1	Osteoclast-stimulating factor 1	OSTF1	23.787	214	214	0	2.7228	0.62796	0.78403	22.613	NaN	NaN	NaN	NaN	NaN	NaN	NaN	NaN	NaN	2238800	1286000	952810	0	0	0	821470	472880	348580	1417300	813110	604230
A0A3B3ITT5;P47914	A0A3B3ITT5;P47914	1;1	1;1	1;1	60S ribosomal protein L29	RPL29	18.512	167	167;159	0	3.8571	0.36448	0.78538	11.607	NaN	NaN	NaN	NaN	NaN	NaN	NaN	NaN	NaN	5487700	3886100	1601600	2472500	1823600	648850	3015200	2062500	952770	0	0	0
Q6ZU15	Q6ZU15	3	2	2	Septin-14	2022-09-14	50.024	432	432	0.0084746	1.2331	0.62414	0.78597	20.311	NaN	NaN	NaN	NaN	NaN	NaN	NaN	NaN	NaN	18401000	9104200	9296400	0	0	0	2085100	1546900	538200	16315000	7557200	8758200
Q8IYT4-2;Q8IYT4;K7EM02;K7EMW1;K7EIJ8	Q8IYT4-2;Q8IYT4;K7EM02;K7EMW1;K7EIJ8	2;2;1;1;1	2;2;1;1;1	2;2;1;1;1	Katanin p60 ATPase-containing subunit A-like 2	KATNAL2	52.781	466	466;538;128;222;341	0.0015049	1.7523	0.57346	0.787	1.8336	NaN	NaN	NaN	NaN	NaN	NaN	NaN	NaN	NaN	21369000	6604300	14765000	6971100	0	6971100	9601600	4610400	4991200	4796700	1993900	2802900
P27348;E9PG15	P27348;E9PG15	12;6	8;4	8;4	14-3-3 protein theta	YWHAQ	27.764	245	245;149	0	323.31	0.48923	0.78792	26.568	0.26255	0.46472	0.85078	0.70111	0.76698	0.93489	30.918	26.808	19.453	224200000	138640000	85558000	39568000	30233000	9335600	71487000	47081000	24406000	113150000	61330000	51816000
H0YML5;Q16822-3;Q16822;H0YMU6;H0YNG4;H0YMA5;H0YM31;Q16822-2	H0YML5;Q16822-3;Q16822;H0YMU6;H0YNG4;H0YMA5;H0YM31;Q16822-2	2;2;2;1;1;1;1;1	2;2;2;1;1;1;1;1	2;2;2;1;1;1;1;1	Phosphoenolpyruvate carboxykinase [GTP], mitochondrial	PCK2	52.466	474	474;506;640;107;113;122;509;441	0.0027952	1.4758	0.51226	0.78867	20.937	0.52667	NaN	NaN	0.89538	NaN	NaN	17.947	NaN	NaN	1248300	784090	464260	704450	434410	270040	543900	349690	194210	0	0	0
Q9UHL4;R4GN05;R4GNE8	Q9UHL4	3;1;1	3;1;1	3;1;1	Dipeptidyl peptidase 2	DPP7	54.341	492	492;155;272	0	4.5628	0.55674	0.78907	54.311	NaN	0.32696	NaN	NaN	0.54745	NaN	NaN	8.933	NaN	10065000	7620400	2444600	1006300	616540	389750	5612200	4249500	1362600	3446500	2754300	692200
A0A2R8YDP2;A0A2R8Y5A0;A0A2R8YF43;A0A2R8YFU2;A0A2R8YD58;E7EU96;P68400;A0A2R8YCK2;A0A2R8YEW1;V9GYA2;A0A2R8Y4D6;A0A2R8Y4H0;P68400-2;Q8NEV1	A0A2R8YDP2;A0A2R8Y5A0;A0A2R8YF43;A0A2R8YFU2;A0A2R8YD58;E7EU96;P68400;A0A2R8YCK2;A0A2R8YEW1;V9GYA2;A0A2R8Y4D6;A0A2R8Y4H0;P68400-2;Q8NEV1	2;2;2;2;2;2;2;1;1;1;1;1;1;1	2;2;2;2;2;2;2;1;1;1;1;1;1;1	2;2;2;2;2;2;2;1;1;1;1;1;1;1	Casein kinase II subunit alpha;Casein kinase II subunit alpha 3	CSNK2A1;CSNK2A3	40.587	354	354;354;363;374;376;385;391;117;133;144;207;256;255;391	0	2.3354	0.52008	0.78927	0.80012	0.3308	0.52008	1.0334	0.60751	0.74654	1.0819	36.216	8.6707	18.629	3729000	2284400	1444600	811850	553540	258310	1491700	965940	525760	1425500	764970	660490
A0A087WXQ5;K7EJM5;A0A087WV68;A0A087WX29;A0A0A0N0M3;K7EN94;B1AKP7;G3V162;A0A087X260;A0A087WYY0;Q13148	A0A087WXQ5;K7EJM5;A0A087WV68;A0A087WX29;A0A0A0N0M3;K7EN94;B1AKP7;G3V162;A0A087X260;A0A087WYY0;Q13148	1;1;1;1;1;1;1;1;1;1;1	1;1;1;1;1;1;1;1;1;1;1	1;1;1;1;1;1;1;1;1;1;1	TAR DNA-binding protein 43	TARDBP;TDP43	22.837	200	200;201;212;243;269;275;295;298;301;304;414	0.00078309	1.9315	0.75092	0.78945	7.9619	NaN	NaN	NaN	NaN	NaN	NaN	NaN	NaN	NaN	1805300	1281300	524010	468680	375590	93090	522650	373750	148900	813930	531920	282010
A0A2U3TZU2;P06744;P06744-2;K7EQ48;A0A0J9YXP8;A0A0J9YX90;A0A0J9YYH3;A0A2R8Y6C7;K7EPY4;K7ERC6;K7EP41;K7ENA0;K7EIL4;A0A0J9YXH9;K7ERK8;A0A2R8YF08;K7ELR7;A0A0J9YXM3;A0A0J9YYI8;K7ESF4	A0A2U3TZU2;P06744;P06744-2;K7EQ48;A0A0J9YXP8;A0A0J9YX90;A0A0J9YYH3;A0A2R8Y6C7	13;13;13;10;8;8;8;8;5;5;4;4;3;3;3;3;3;3;2;1	13;13;13;10;8;8;8;8;5;5;4;4;3;3;3;3;3;3;2;1	10;10;10;8;7;7;7;7;5;5;4;4;3;3;3;3;3;3;2;1	Glucose-6-phosphate isomerase	GPI	67.285	597	597;558;569;447;268;279;283;316;166;170;159;162;116;133;139;145;146;161;110;209	0	323.31	0.40765	0.79002	27.177	0.30355	0.33962	0.91154	0.77148	0.59799	0.97021	32.526	41.758	22.2	263180000	170720000	92459000	43556000	31542000	12014000	96509000	71593000	24915000	123110000	67585000	55529000
A0A804HIV9;A0A804HJ36;J3KR24;A0A804HHW9;A0A804HL54;A0A804HJN6;A0A0A0MSX9;P41252;A0A0D9SFC1;A0A804HKW6;A0A804HIG2;A0A804HKU1;A0A804HK69	A0A804HIV9;A0A804HJ36;J3KR24;A0A804HHW9;A0A804HL54;A0A804HJN6;A0A0A0MSX9;P41252;A0A0D9SFC1;A0A804HKW6;A0A804HIG2;A0A804HKU1;A0A804HK69	2;2;2;2;2;2;2;2;1;1;1;1;1	2;2;2;2;2;2;2;2;1;1;1;1;1	2;2;2;2;2;2;2;2;1;1;1;1;1	Isoleucine--tRNA ligase, cytoplasmic	IARS	112.64	971	971;1076;1121;1220;1237;1242;1242;1262;71;139;435;713;724	0	3.5068	0.56039	0.79184	48.235	0.27232	0.63181	NaN	0.48075	0.90015	NaN	10.131	18.131	NaN	3549500	2185700	1363900	1012700	761340	251340	1484100	970200	513890	1052800	454150	598620
H0YN88;A0A075B716;H3BNC9;P08708;REV__F8WFC6;REV__Q9H089	H0YN88;A0A075B716;H3BNC9;P08708	3;3;3;3;1;1	3;3;3;3;1;1	3;3;3;3;1;1	40S ribosomal protein S17	RPS17	15.919	136	136;191;584;135;178;658	0	4.9708	0.44045	0.79222	32.139	0.35161	0.48042	0.46511	0.78709	0.95121	0.49416	23.208	23.031	31.943	29065000	19795000	9270000	13106000	9454600	3651700	7389500	4910800	2478800	8569200	5429600	3139500
P54709;C9JXZ1;C9JA36;P54709-2;H7C547;F8WBY4	P54709;C9JXZ1;C9JA36;P54709-2	4;2;2;2;1;1	4;2;2;2;1;1	4;2;2;2;1;1	Sodium/potassium-transporting ATPase subunit beta-3	ATP1B3	31.512	279	279;119;133;193;43;44	0	6.8427	0.57677	0.79261	21.925	NaN	0.33467	0.92475	NaN	0.55672	0.99594	NaN	17.536	5.6301	13232000	8587200	4645100	1025300	668410	356920	7756300	5635700	2120600	4450600	2283100	2167500
O94855;O94855-2;E9PC44;E9PDM8	O94855;O94855-2;E9PC44;E9PDM8	4;4;3;3	4;4;3;3	4;4;3;3	Protein transport protein Sec24D	SEC24D	113.01	1032	1032;1033;393;663	0	5.2629	0.57643	0.79265	38.661	0.58332	0.48469	NaN	1.1032	0.7102	NaN	48.576	15.534	NaN	4185100	2510600	1674400	1154100	714600	439550	1602300	1166500	435750	1428600	629510	799130
A6NL93;A6NEL0;P05114	A6NL93;A6NEL0;P05114	2;2;2	2;2;2	2;2;2	Non-histone chromosomal protein HMG-14	HMGN1	9.5355	90	90;116;100	0	7.309	0.6082	0.79376	23.112	NaN	NaN	NaN	NaN	NaN	NaN	NaN	NaN	NaN	13357000	6661300	6695400	0	0	0	2273900	1287900	985990	11083000	5373400	5709400
H7C286;C9JEV6;Q9UJ70;Q9UJ70-2;H7C3G9;E9PPU6;H0YF44;H0YC94;H0YEB7	H7C286;C9JEV6;Q9UJ70;Q9UJ70-2;H7C3G9	3;3;3;3;2;1;1;1;1	3;3;3;3;2;1;1;1;1	3;3;3;3;2;1;1;1;1	N-acetyl-D-glucosamine kinase	NAGK	21.977	196	196;293;344;390;340;94;109;136;182	0.0015267	1.812	0.58208	0.79558	103.88	NaN	NaN	NaN	NaN	NaN	NaN	NaN	NaN	NaN	1350300	1116900	233430	644070	494190	149880	0	0	0	706270	622720	83550
P51665;H3BNT7;H3BTM8	P51665;H3BNT7;H3BTM8	4;3;3	4;3;3	4;3;3	26S proteasome non-ATPase regulatory subunit 7	PSMD7	37.025	324	324;177;198	0	2.9604	0.51844	0.79574	254.75	NaN	0.453	NaN	NaN	0.71813	NaN	NaN	14.513	NaN	7677500	1769300	5908200	5332900	136800	5196100	2344600	1632500	712140	0	0	0
P04075;P04075-2;H3BQN4;J3KPS3;H3BPS8;H3BUH7;H3BR04;H3BR68;H3BMQ8;H3BU78;A0A087WXX2;A0A3B3IS80;P05062	P04075;P04075-2;H3BQN4;J3KPS3;H3BPS8	16;16;14;14;11;6;6;5;5;5;1;1;1	16;16;14;14;11;6;6;5;5;5;1;1;1	12;12;10;12;7;6;6;5;5;5;0;0;0	Fructose-bisphosphate aldolase A;Fructose-bisphosphate aldolase	ALDOA	39.42	364	364;418;361;368;278;155;162;130;140;204;316;342;364	0	323.31	0.38934	0.79649	23.786	0.25095	0.41693	1.2634	0.64085	0.70422	1.2942	27.582	26.822	12.603	797490000	477020000	320470000	206230000	161620000	44607000	226490000	157580000	68912000	364780000	157830000	206950000
O75947;F5H608;O75947-2	O75947;F5H608;O75947-2	2;1;1	2;1;1	2;1;1	ATP synthase subunit d, mitochondrial	ATP5H	18.491	161	161;81;137	0	11.234	0.41933	0.79697	47.119	0.3406	0.61846	NaN	0.63953	0.85843	NaN	31.124	77.109	NaN	3926500	2364200	1562400	1400700	904290	496430	1411700	872390	539320	1114100	587500	526610
A0A087WUZ3;Q01082;Q01082-2;Q01082-3;F8W6C1;P11277-3;P11277;P11277-2;O15020-2;O15020;A4QPE4	A0A087WUZ3;Q01082;Q01082-2;Q01082-3	59;59;51;50;10;2;2;2;2;2;1	59;59;51;50;10;2;2;2;2;2;1	58;58;50;49;9;1;1;1;1;1;0	Spectrin beta chain, non-erythrocytic 1	SPTBN1	274.83	2366	2366;2364;2168;2155;690;2106;2137;2328;2365;2390;934	0	323.31	0.51131	0.79825	25.214	0.25806	0.46226	0.8433	0.59598	0.78012	0.89068	25.457	24.58	22.617	353240000	224040000	129200000	61519000	47188000	14331000	145650000	97927000	47718000	146070000	78925000	67146000
Q5TEZ5;V9GZ22	Q5TEZ5;V9GZ22	2;1	2;1	2;1	Uncharacterized protein C6orf163	C6orf163	38.553	329	329;199	0.00081699	2.1846	0.68762	0.79882	34.196	NaN	NaN	0.70776	NaN	NaN	0.75123	NaN	NaN	25.51	10443000	6272200	4171000	958200	544270	413940	963730	583900	379830	8521300	5144100	3377200
Q86UP2-2;Q86UP2-3;Q86UP2-4;Q86UP2;G3V4Y7;B7Z6P3;G3V5P0;H0YJV5;H0YJP2	Q86UP2-2;Q86UP2-3;Q86UP2-4;Q86UP2;G3V4Y7	7;7;7;7;4;3;2;1;1	7;7;7;7;4;3;2;1;1	7;7;7;7;4;3;2;1;1	Kinectin	KTN1	149.61	1300	1300;1306;1329;1357;595;334;160;91;138	0	18.909	0.53825	0.79894	64.855	NaN	0.51759	1.39	NaN	0.73108	1.5042	NaN	72.887	4.6765	7231400	3881800	3349600	0	0	0	5342200	3309400	2032800	1889200	572420	1316800
Q00325-2;Q00325;F8VVM2;F8VWR4;F8VWQ0	Q00325-2;Q00325;F8VVM2	6;6;5;1;1	6;6;5;1;1	6;6;5;1;1	Phosphate carrier protein, mitochondrial	SLC25A3	39.958	361	361;362;324;154;156	0	6.4421	0.644	0.79976	13.549	0.29173	0.58301	0.79718	0.74073	1.0008	0.79525	26.416	6.4214	14.961	73800000	45523000	28276000	22359000	16910000	5448400	19045000	12035000	7010500	32396000	16578000	15817000
A0A075B7D9;Q92804-2;Q92804;H3BPE7;P35637-2;P35637	A0A075B7D9;Q92804-2;Q92804;H3BPE7;P35637-2;P35637	3;3;3;2;2;2	3;3;3;2;2;2	3;3;3;2;2;2	TATA-binding protein-associated factor 2N;RNA-binding protein FUS	TAF15;FUS	48.839	449	449;589;592;527;525;526	0	39.721	0.45252	0.80103	24.239	0.35797	0.47374	NaN	0.86694	0.77595	NaN	38.217	4.4988	NaN	8828900	5847000	2982000	3571500	2595800	975680	4480700	2890200	1590400	776790	360930	415860
Q9Y265;Q9Y265-2;H7C4G5;E7ETR0	Q9Y265;Q9Y265-2	3;2;1;1	3;2;1;1	3;2;1;1	RuvB-like 1	RUVBL1	50.227	456	456;386;267;315	0	3.9979	0.61792	0.80144	7.2645	0.38752	0.63483	0.66119	0.80144	0.95958	0.706	25.21	12.654	7.205	6637300	4093500	2543800	2576300	1805000	771290	1959400	1214600	744800	2101600	1073900	1027700
A0A0A0MR02;P45880-2;P45880;P45880-1;Q5JSD2;Q5JSD1;A2A3S1	A0A0A0MR02;P45880-2;P45880;P45880-1;Q5JSD2;Q5JSD1	5;5;5;5;3;3;2	5;5;5;5;3;3;2	5;5;5;5;3;3;2	Voltage-dependent anion-selective channel protein 2	VDAC2	30.348	282	282;283;294;309;194;204;109	0	124.6	0.58994	0.80243	22.089	0.34847	0.56047	0.74852	0.77215	0.95121	0.80243	17.568	2.431	22.089	39588000	24631000	14958000	11509000	8820100	2688700	10215000	6531300	3683500	17865000	9279200	8585500
P09960-3;P09960-2;P09960-4;P09960	P09960-3;P09960-2;P09960-4;P09960	4;4;4;4	4;4;4;4	4;4;4;4	Leukotriene A-4 hydrolase	LTA4H	57.299	508	508;532;587;611	0	7.4669	0.49075	0.80333	34.053	0.54641	0.40273	NaN	1.022	0.62732	NaN	20.563	24.988	NaN	6524500	4407600	2116900	2773800	1928300	845450	2889600	2089500	800040	861130	389740	471390
Q07954;H0YJI8;Q7Z7K9;Q6PJ72;Q07954-2	Q07954	11;1;1;1;1	11;1;1;1;1	11;1;1;1;1	Prolow-density lipoprotein receptor-related protein 1;Low-density lipoprotein receptor-related protein 1 85 kDa subunit;Low-density lipoprotein receptor-related protein 1 515 kDa subunit;Low-density lipoprotein receptor-related protein 1 intracellular domain	LRP1	504.6	4544	4544;139;296;439;292	0	90.927	0.4835	0.80387	30.229	0.39619	0.43259	0.82281	0.76944	0.63546	0.87278	26.483	53.458	11.631	6060300	3791300	2269000	2240400	1646900	593440	1671000	1042600	628350	2148900	1101800	1047200
P47755;F8W9N7;C9JUG7;A0A0D9SET8;P47755-2;F8WED3	P47755;F8W9N7;C9JUG7;A0A0D9SET8;P47755-2	6;4;3;3;3;1	6;4;3;3;3;1	6;4;3;3;3;1	F-actin-capping protein subunit alpha-2	CAPZA2	32.949	286	286;174;146;174;172;37	0	13.666	0.51748	0.80457	25.69	0.32385	0.38273	1.0417	0.70938	0.66245	1.108	13.944	30.015	37.338	24350000	15488000	8861100	3134300	2147100	987230	10123000	7003000	3120300	11092000	6338400	4753700
A0A6Q8PGI9;A0A6Q8PF26;A0A6Q8PGM8;A0A6Q8PHU0;A0A6Q8PF35;F8VUA2;F8VVT7;F5H875;A0A6Q8PFF8;A0A6Q8PFF9;Q9HD42	A0A6Q8PGI9;A0A6Q8PF26;A0A6Q8PGM8;A0A6Q8PHU0;A0A6Q8PF35;F8VUA2;F8VVT7;F5H875;A0A6Q8PFF8;A0A6Q8PFF9;Q9HD42	1;1;1;1;1;1;1;1;1;1;1	1;1;1;1;1;1;1;1;1;1;1	1;1;1;1;1;1;1;1;1;1;1	Charged multivesicular body protein 1a	CHMP1A	5.6437	49	49;54;113;147;154;181;187;253;265;383;196	0.00079177	1.9857	0.51857	0.8047	24.334	NaN	NaN	NaN	NaN	NaN	NaN	NaN	NaN	NaN	2732200	1723700	1008600	634190	469810	164380	1056700	721950	334790	1041300	531890	509400
A0A1C7CYX9;Q16555-2;Q16555;E5RFU4;E9PD68;Q14194;Q14194-2	A0A1C7CYX9;Q16555-2;Q16555	23;17;17;3;2;2;2	23;17;17;3;2;2;2	22;16;16;3;1;1;1	Dihydropyrimidinase-related protein 2	DPYSL2	73.502	677	677;536;572;170;570;572;686	0	323.31	0.57198	0.80528	13.872	0.36787	0.44179	0.80405	0.96292	0.74212	0.86135	27.027	28.503	14.746	463670000	291280000	172390000	63519000	44927000	18592000	183570000	126200000	57372000	216590000	120160000	96429000
A0A7I2YQX9;F8W6I7;A0A7I2V3R8;P09651-3;P09651-2;P09651;A0A2R8Y4L2;A0A7I2V3W0;Q32P51;A0A7I2V5U9;F8VTQ5;H0YH80;F8VZ49;A0A7I2V2L6;A0A7I2YQY2;A0A7I2V497;A0A7I2V3U8;A0A7I2V2F1;A0A7I2V5N7;A0A7I2V4P7;A0A7I2V2X1;A0A7I2V4E2;A0A7I2V661;A0A7I2V5P1;A0A7I2V666;A0A7I2V3K5;A0A7I2V2R4;A0A7I2V453;A0A7I2V334;A0A7I2V2Q7;A0A7I2V520;A0A7I2V459;A0A7I2V4F8;A0A7I2V2M7;A0A7I2V360	A0A7I2YQX9;F8W6I7;A0A7I2V3R8;P09651-3;P09651-2;P09651;A0A2R8Y4L2;A0A7I2V3W0;Q32P51;A0A7I2V5U9;F8VTQ5;H0YH80;F8VZ49;A0A7I2V2L6	6;6;6;6;6;6;5;5;5;4;4;4;4;4;2;1;1;1;1;1;1;1;1;1;1;1;1;1;1;1;1;1;1;1;1	5;5;5;5;5;5;4;4;4;3;3;4;3;3;2;1;1;1;1;1;1;1;1;1;1;1;1;1;1;1;1;1;1;1;1	5;5;5;5;5;5;4;4;4;3;3;4;3;3;2;1;1;1;1;1;1;1;1;1;1;1;1;1;1;1;1;1;1;1;1	Heterogeneous nuclear ribonucleoprotein A1;Heterogeneous nuclear ribonucleoprotein A1, N-terminally processed;Heterogeneous nuclear ribonucleoprotein A1-like 2	HNRNPA1;HNRNPA1L2	29.069	275	275;307;319;267;320;372;275;326;320;75;145;191;231;242;45;32;54;55;56;60;61;65;70;70;77;77;78;83;83;96;97;97;99;104;108	0	267.48	0.47202	0.80607	10.747	0.35377	0.46643	0.55965	0.92736	0.80607	0.60338	1.8024	12.526	57.631	60442000	38869000	21573000	15570000	11237000	4332900	21844000	14566000	7278500	23028000	13066000	9961200
Q53GQ0;E9PI21;A0A1B0GVY6;A0A1B0GV93	Q53GQ0;E9PI21;A0A1B0GVY6;A0A1B0GV93	3;2;2;2	3;2;2;2	3;2;2;2	Very-long-chain 3-oxoacyl-CoA reductase	HSD17B12	34.324	312	312;164;178;276	0	17.191	0.48878	0.80633	11.674	0.4708	0.49486	NaN	1.0071	0.74245	NaN	21.564	18.643	NaN	9905800	5504600	4401200	2429500	1485700	943860	4419400	2783500	1635900	3056900	1235400	1821500
A0A6Q8PFX2;P54577	A0A6Q8PFX2;P54577	2;2	2;2	2;2	Tyrosine--tRNA ligase, cytoplasmic;Tyrosine--tRNA ligase, cytoplasmic, N-terminally processed	YARS	53.592	479	479;528	0	3.4823	0.51554	0.80696	42.889	0.4495	NaN	NaN	0.88439	NaN	NaN	60.191	NaN	NaN	2986900	2024400	962540	1885800	1326900	558830	1101100	697420	403710	0	0	0
A0A0C4DGQ5;P04632;K7EM73;K7ELJ7;K7EIV0;A0A075B7C0;K7EKD8;U3KQE2;U3KPR7;K7ES78;K7EMQ1	A0A0C4DGQ5;P04632;K7EM73;K7ELJ7;K7EIV0;A0A075B7C0;K7EKD8;U3KQE2	6;6;5;5;4;4;4;3;2;1;1	6;6;5;5;4;4;4;3;2;1;1	6;6;5;5;4;4;4;3;2;1;1	Calpain small subunit 1	CAPNS1	33.786	322	322;268;163;278;196;197;238;161;100;72;94	0	103.33	0.61992	0.80721	7.59	0.2402	0.50949	0.77887	0.6433	0.77775	0.83834	24.903	16.442	22.502	62925000	40289000	22636000	16384000	12638000	3745900	24041000	15247000	8793800	22501000	12404000	10097000
Q96C19;H0Y4Y4;A0A087X1Z2;Q9BUP0-2;Q9BUP0;C9JTV4;Q8WYH2	Q96C19;H0Y4Y4	5;4;2;2;2;1;1	5;4;2;2;2;1;1	5;4;2;2;2;1;1	EF-hand domain-containing protein D2	EFHD2	26.697	240	240;179;142;143;239;81;127	0	12.786	0.48914	0.80816	14.697	0.44208	0.43175	NaN	0.90229	0.75022	NaN	24.115	15.134	NaN	10741000	7388900	3352400	1886600	1448000	438660	7600600	5338900	2261700	1254100	602050	652080
A6NLN1;A0A7I2V621;A0A0U1RRM4;P26599;P26599-2;P26599-3;K7EK45;A0A0D9SF20;A0A087WU68;A0A7I2V4H6;A0A6Q8PEX4;A0A087WUW5;K7EKJ7;O95758-7;O95758-1;O95758-6;O95758-2;O95758;O95758-5;O95758-4	A6NLN1;A0A7I2V621;A0A0U1RRM4;P26599;P26599-2;P26599-3;K7EK45	5;5;5;5;5;5;3;2;2;2;2;1;1;1;1;1;1;1;1;1	5;5;5;5;5;5;3;2;2;2;2;1;1;1;1;1;1;1;1;1	4;4;4;4;4;4;3;1;2;2;2;1;1;1;1;1;1;1;1;1	Polypyrimidine tract-binding protein 1	PTBP1	56.51	527	527;559;588;531;550;557;256;197;227;313;339;81;237;457;521;524;547;552;555;558	0	6.0449	0.68115	0.80855	100.34	NaN	0.39784	0.96476	NaN	0.57029	1.0448	NaN	19.942	89.072	23482000	11495000	11987000	546510	384160	162350	2821500	2019100	802450	20113000	9091500	11022000
P30044-2;P30044;P30044-3;P30044-4	P30044-2;P30044;P30044-3	7;7;6;3	7;7;6;3	7;7;6;3	Peroxiredoxin-5, mitochondrial	PRDX5	17.031	162	162;214;170;125	0	17.918	0.44669	0.80864	20.179	0.33002	0.44669	0.75207	0.87026	0.76522	0.81997	10.411	41.14	7.6209	93930000	59497000	34433000	25727000	18040000	7686900	31068000	21072000	9995700	37135000	20385000	16750000
P40227;P40227-2	P40227;P40227-2	5;4	5;4	4;3	T-complex protein 1 subunit zeta	CCT6A	58.024	531	531;486	0	6.588	0.522	0.80935	35.818	NaN	0.522	NaN	NaN	0.80935	NaN	NaN	34.421	NaN	6627500	4163800	2463700	358590	230370	128220	3941700	2774100	1167500	2327300	1159300	1168000
Q92526-2;Q92526;Q92526-3;J3KRI6	Q92526-2;Q92526;Q92526-3	3;3;2;1	2;2;1;1	2;2;1;1	T-complex protein 1 subunit zeta-2	CCT6B	53.1	485	485;530;493;128	0.0028031	1.4816	0.56525	0.80939	46.938	NaN	0.55323	NaN	NaN	0.83873	NaN	NaN	75.727	NaN	4584100	2753000	1831100	925430	618040	307390	2304900	1542500	762390	1353700	592460	761290
A0A0D9SFS3;Q02218;E9PFG7;E9PDF2;E9PCR7;Q02218-2;Q02218-3;C9J4G7;Q9ULD0-3;Q9ULD0-2;Q9ULD0	A0A0D9SFS3;Q02218;E9PFG7;E9PDF2;E9PCR7;Q02218-2;Q02218-3	5;5;4;4;4;4;3;1;1;1;1	5;5;4;4;4;4;3;1;1;1;1	5;5;4;4;4;4;3;1;1;1;1	2-oxoglutarate dehydrogenase, mitochondrial	OGDH	113.31	1001	1001;1023;873;1034;1038;1019;427;211;801;953;1010	0	3.7174	0.84241	0.81001	19.612	NaN	NaN	0.75386	NaN	NaN	0.81001	NaN	NaN	20.924	5772900	3856000	1916800	552630	443280	109350	1077300	602920	474420	4142900	2809800	1333100
F8VQ14;F5GWF6;P78371;P78371-2	F8VQ14;F5GWF6;P78371;P78371-2	7;7;7;5	7;7;7;5	7;7;7;5	T-complex protein 1 subunit beta	CCT2	44.812	416	416;530;535;488	0	60.712	0.58718	0.81209	8.139	0.33992	0.54207	0.78096	0.69552	0.8484	0.8239	20.664	12.982	12.319	60235000	34393000	25843000	10458000	7681700	2776200	9591200	5842600	3748500	40186000	20869000	19318000
O60784;O60784-2;O60784-4;B0QY01;O60784-3;F8WB30;F8WAW7;F8WE29;F8WBB0;H7BYN7;V9GYF4;B0QY02	O60784;O60784-2;O60784-4;B0QY01;O60784-3	6;6;5;4;4;1;1;1;1;1;1;1	6;6;5;4;4;1;1;1;1;1;1;1	6;6;5;4;4;1;1;1;1;1;1;1	Target of Myb protein 1	TOM1	53.818	492	492;493;460;334;447;25;69;83;97;133;134;151	0	19.551	0.58195	0.81575	13.56	NaN	0.48212	0.87331	NaN	0.7552	0.91473	NaN	29.621	5.2872	6420900	4141400	2279600	0	0	0	4981100	3299700	1681400	1439800	841680	598100
A0A6Q8PFJ0;P02545;P02545-3;P02545-6;P02545-2;A0A804HL68;P02545-5;P02545-4;Q3BDU5;A0A6Q8PHQ9;Q5TCI8;A0A6Q8PF80;A0A6Q8PGH0;A0A6Q8PFM1;A0A6Q8PF59;A0A6Q8PFF5;REV__Q5VX52	A0A6Q8PFJ0;P02545;P02545-3;P02545-6;P02545-2;A0A804HL68;P02545-5;P02545-4;Q3BDU5;A0A6Q8PHQ9;Q5TCI8;A0A6Q8PF80	34;34;33;32;31;30;28;28;27;27;25;22;15;6;6;1;1	34;34;33;32;31;30;28;28;27;27;25;22;15;6;6;1;1	33;33;32;31;30;29;27;27;26;26;24;22;15;6;6;1;1	Prelamin-A/C;Lamin-A/C	LMNA	80.902	729	729;664;634;614;572;540;565;574;487;516;491;342;214;123;126;36;459	0	323.31	0.45361	0.81578	19.062	0.36589	0.45002	0.62524	0.9208	0.83559	0.63431	22.779	19.395	11.916	2119500000	1413200000	706280000	516250000	374220000	142030000	799100000	552660000	246440000	804120000	486300000	317820000
Q16891-3;Q16891-4;Q16891;H7C463;C9J406;B9A067;Q16891-2	Q16891-3;Q16891-4;Q16891;H7C463;C9J406;B9A067;Q16891-2	6;6;6;5;5;5;5	6;6;6;5;5;5;5	6;6;6;5;5;5;5	MICOS complex subunit MIC60	IMMT	80.026	726	726;757;758;613;659;711;747	0	13.997	0.47686	0.81614	5.4456	0.30448	0.51023	0.72442	0.79794	0.83063	0.7489	19.745	8.2467	38.536	12689000	7960800	4728400	4141600	2964400	1177100	4856200	3053300	1802800	3691500	1943100	1748500
G3V1Q4;E7ES33;E7EPK1;Q16181-2;Q16181;Q5JXL7;A0A0U1RRM2;A0A0U1RRE1;A0A0U1RRH9;A0A5F9ZGZ7	G3V1Q4;E7ES33;E7EPK1;Q16181-2;Q16181	11;11;11;11;11;3;3;3;2;1	11;11;11;11;11;3;3;3;2;1	10;10;10;10;10;3;3;2;1;1	Septin-7	2022-09-07	46.566	401	401;417;437;436;437;88;111;157;147;174	0	174.78	0.57077	0.81617	22.529	0.23783	0.56987	0.83259	0.63498	0.80772	0.90355	25.889	27.79	9.6388	50764000	32216000	18548000	10758000	8368700	2388900	22466000	14759000	7706800	17540000	9088300	8451900
A0A5F9ZH34;A0A669KB19;B7Z651;A0A0U1RQN6;A0A5F9ZI45;A0A5F9ZHM6;E9PHW9;A0A5F9ZH38;A0A5F9ZI53;A0A5F9ZH35;A0A5F9ZHY6;A0A5F9ZI15;A0A5F9ZH58;A0A5F9ZHN0;A0A5F9ZH03;A0A5F9ZI08;A0A5F9ZHE2;A0A5F9ZHR2;A0A5F9ZHL9;A0A5F9ZHJ4;A0A5F9ZI73;A0A5F9ZGS7;A0A5F9ZGX8;A0A5F9ZHQ3;A0A5F9ZI69;A0A5F9ZI36;A0A5F9ZHA1;A0A5F9ZHJ6;A0A5F9ZHL3;A0A5F9ZGS5;A0A5F9ZHL5;A0A5F9ZI18;A0A5F9ZH17;A0A5F9ZI56;A0A5F9ZH39;A0A5F9ZGY1;A0A5F9ZHG3;…	A0A5F9ZH34;A0A669KB19;B7Z651;A0A0U1RQN6;A0A5F9ZI45;A0A5F9ZHM6;E9PHW9;A0A5F9ZH38;A0A5F9ZI53;A0A5F9ZH35;A0A5F9ZHY6;A0A5F9ZI15;A0A5F9ZH58;A0A5F9ZHN0;A0A5F9ZH03;A0A5F9ZI08;A0A5F9ZHE2;A0A5F9ZHR2;A0A5F9ZHL9;A0A5F9ZHJ4;A0A5F9ZI73;A0A5F9ZGS7;A0A5F9ZGX8;A0A5F9ZHQ3;A0A5F9ZI69;A0A5F9ZI36;A0A5F9ZHA1;A0A5F9ZHJ6;A0A5F9ZHL3;A0A5F9ZGS5;A0A5F9ZHL5;A0A5F9ZI18;A0A5F9ZH17;A0A5F9ZI56;A0A5F9ZH39;A0A5F9ZGY1;A0A5F9ZHG3;…	2;1;1;1;1;1;1;1;1;1;1;1;1;1;1;1;1;1;1;1;1;1;1;1;1;1;1;1;1;1;1;1;1;1;1;1;1;1;1;1;1;1;1;1;1;1;1;1;1;1;1;1;1;1;1;1;1;1;1;1;1;1;1;1;1	2;1;1;1;1;1;1;1;1;1;1;1;1;1;1;1;1;1;1;1;1;1;1;1;1;1;1;1;1;1;1;1;1;1;1;1;1;1;1;1;1;1;1;1;1;1;1;1;1;1;1;1;1;1;1;1;1;1;1;1;1;1;1;1;1	2;1;1;1;1;1;1;1;1;1;1;1;1;1;1;1;1;1;1;1;1;1;1;1;1;1;1;1;1;1;1;1;1;1;1;1;1;1;1;1;1;1;1;1;1;1;1;1;1;1;1;1;1;1;1;1;1;1;1;1;1;1;1;1;1	Ankyrin-2	ANK2	185.65	1689	1689;1105;1114;1194;1440;1708;1730;1739;1755;1758;1763;1768;1770;1777;1785;1797;1806;1810;1817;1818;1822;1827;1830;1838;1839;1846;1849;1851;1858;1871;1872;1879;1879;1882;1887;1887;1891;1894;1910;1915;1931;1943;3820;3848;3862;3870;3874;3879;3882;3891;3895;3903;3915;3924;3934;3936;3939;3961;3964;3972;3984;3995;1863;1872;3957	0.0041237	1.4073	0.74264	0.81645	72.532	NaN	NaN	NaN	NaN	NaN	NaN	NaN	NaN	NaN	11974000	6543900	5429700	222320	180040	42282	3012100	1578900	1433200	8739100	4785000	3954100
P10599-2;P10599	P10599-2;P10599	4;4	4;4	4;4	Thioredoxin	TXN	9.4519	85	85;105	0	138.64	0.58469	0.81704	9.7404	0.30279	0.5626	0.71951	0.75959	0.92879	0.74696	37.739	25.713	5.7705	341340000	217850000	123500000	60959000	47089000	13871000	121480000	79463000	42014000	158910000	91294000	67612000
O76003	O76003	1	1	1	Glutaredoxin-3	GLRX3	37.432	335	335	0.002807	1.4872	0.65752	0.81756	23.449	NaN	NaN	NaN	NaN	NaN	NaN	NaN	NaN	NaN	1012800	588890	423930	0	0	0	416860	231950	184910	595960	356940	239020
P11279;P11279-2	P11279;P11279-2	4;3	4;3	4;3	Lysosome-associated membrane glycoprotein 1	LAMP1	44.882	417	417;364	0	11.99	0.47478	0.81862	3.8617	0.40387	0.43181	0.74036	1.0613	0.73511	0.8065	19.462	18.129	2.1087	60080000	39540000	20540000	11598000	7656800	3940900	27879000	19803000	8076100	20604000	12080000	8523400
D6R918;D6RBC5;D6RDI5;D6RA54;D6RC55;D6RG39;D6RIT9;Q9NX40-3;Q9NX40-2;Q9NX40-4;Q9NX40	D6R918;D6RBC5;D6RDI5;D6RA54;D6RC55;D6RG39;D6RIT9;Q9NX40-3;Q9NX40-2;Q9NX40-4;Q9NX40	1;1;1;1;1;1;1;1;1;1;1	1;1;1;1;1;1;1;1;1;1;1	1;1;1;1;1;1;1;1;1;1;1	OCIA domain-containing protein 1	OCIAD1	8.2873	73	73;80;97;110;112;171;172;187;187;194;245	0.0028189	1.5	0.66642	0.81874	5.4109	NaN	NaN	NaN	NaN	NaN	NaN	NaN	NaN	NaN	1038800	600390	438390	0	0	0	432640	244620	188020	606140	355770	250370
P30084	P30084	1	1	1	Enoyl-CoA hydratase, mitochondrial	ECHS1	31.387	290	290	0	4.4923	0.71066	0.81888	60.402	NaN	0.90476	NaN	NaN	1.2573	NaN	NaN	17.53	NaN	6129200	3651800	2477300	829190	633170	196020	1671000	822030	848970	3629000	2196600	1432400
E9PR30;P62861	E9PR30;P62861	1;1	1;1	1;1	40S ribosomal protein S30	FAU	10.905	98	98;59	0.0028881	1.591	0.36416	0.81911	38.489	NaN	NaN	NaN	NaN	NaN	NaN	NaN	NaN	NaN	8125500	5113900	3011600	2279800	1782600	497150	3184500	2216400	968150	2661200	1114800	1546300
P30041	P30041	8	8	8	Peroxiredoxin-6	PRDX6	25.035	224	224	0	81.21	0.46754	0.81917	9.0869	0.24592	0.46755	0.98785	0.64234	0.81692	1.0495	19.88	4.3111	18.569	164900000	106280000	58614000	50622000	39990000	10633000	53763000	35162000	18601000	60512000	31132000	29380000
P21796;C9JI87	P21796;C9JI87	11;6	11;6	11;6	Voltage-dependent anion-selective channel protein 1	VDAC1	30.772	283	283;183	0	323.31	0.48403	0.81962	24	0.25105	0.47974	1.0052	0.62013	0.7856	1.0877	26.781	6.2515	10.582	107490000	68919000	38570000	26749000	21063000	5686100	40760000	27873000	12887000	39980000	19983000	19997000
P62857	P62857	2	2	2	40S ribosomal protein S28	RPS28	7.8409	69	69	0	11.851	0.41543	0.82082	34.916	0.24322	0.58379	NaN	0.67779	1.0138	NaN	67.558	5.0569	NaN	24486000	15719000	8767500	6950600	5198200	1752400	10247000	6623600	3623100	7288800	3896800	3392000
A0A087WUV8;A0A7P0T8A7;A0A7P0TB04;A0A7P0TA85;P35613-3;P35613-4;P35613-2;P35613;R4GN83;R4GMX5;I3L192	A0A087WUV8;A0A7P0T8A7;A0A7P0TB04;A0A7P0TA85;P35613-3;P35613-4;P35613-2;P35613;R4GN83;R4GMX5;I3L192	4;4;4;4;4;4;4;4;2;2;2	4;4;4;4;4;4;4;4;2;2;2	4;4;4;4;4;4;4;4;2;2;2	Basigin	BSG	20.542	189	189;206;266;266;176;205;269;385;52;84;160	0	11.535	0.43787	0.82086	36.452	0.68458	0.4503	1.3606	1.5202	0.73328	1.4531	50.699	10.042	29.425	17473000	9993500	7479000	3186600	2052200	1134400	8250000	5436900	2813100	6035900	2504500	3531500
A0A0G2JIW1;P0DMV9;P0DMV8;P0DMV8-2;V9GZ37	A0A0G2JIW1;P0DMV9;P0DMV8;P0DMV8-2;V9GZ37	19;19;19;18;14	17;17;17;16;13	9;9;9;9;7	Heat shock 70 kDa protein 1B;Heat shock 70 kDa protein 1A	HSPA1B;HSPA1A	70.108	642	642;641;641;586;476	0	54.548	0.51573	0.82092	29.503	0.51965	0.49678	0.54128	1.208	0.86765	0.57491	38.393	20.215	9.45	221820000	152010000	69817000	21922000	14435000	7486500	81802000	54268000	27534000	118100000	83304000	34797000
P15144;H0YLZ8;H0YMC1	P15144	22;1;1	22;1;1	22;1;1	Aminopeptidase N	ANPEP	109.54	967	967;65;122	0	221.02	0.46416	0.8211	44.502	0.26831	0.85686	0.45885	0.71982	1.4982	0.45557	22.327	38.203	10.364	328440000	216880000	111560000	89172000	67489000	21683000	77531000	42183000	35348000	161740000	107210000	54533000
Q6EMK4	Q6EMK4	3	3	3	Vasorin	VASN	71.712	673	673	0	5.6222	0.46942	0.82141	26.618	NaN	NaN	0.5944	NaN	NaN	0.62722	NaN	NaN	39.258	5908600	3737900	2170700	1397700	1058600	339150	1281600	811700	469920	3229300	1867700	1361600
P46939;P46939-2;P46939-4;Q5T097;A0A0D9SG57;A0A0A0MSM3;P46939-3	P46939;P46939-2;P46939-4	9;9;5;4;2;1;1	9;9;5;4;2;1;1	9;9;5;4;2;1;1	Utrophin	UTRN	394.46	3433	3433;3438;1347;988;150;154;624	0	7.9175	0.51896	0.82156	111.3	NaN	0.51896	NaN	NaN	0.71081	NaN	NaN	32.358	NaN	4398600	2107700	2290900	393060	278400	114670	2905500	1747800	1157700	1100100	81572	1018500
Q15075	Q15075	7	7	7	Early endosome antigen 1	EEA1	162.46	1411	1411	0	10.944	0.61499	0.82181	93.534	NaN	1.0392	NaN	NaN	1.5508	NaN	NaN	89.808	NaN	4577500	2877200	1700200	0	0	0	2962300	1627300	1335100	1615100	1250000	365170
H0YJS8;H0YJC0;A0A087X2I1;P62333	H0YJS8;H0YJC0;A0A087X2I1;P62333	1;1;1;1	1;1;1;1	1;1;1;1	26S protease regulatory subunit 10B	PSMC6	22.05	194	194;262;403;389	0	5.3968	0.82233	0.82291	22.371	0.46532	0.51462	0.69987	0.8407	0.74005	0.76608	13.295	25.282	38.89	4607100	2924700	1682400	1062500	699710	362830	1709200	1209900	499290	1835400	1015100	820280
A0A1X7SC65;O14558;K7EP04	A0A1X7SC65;O14558;K7EP04	4;4;3	4;4;3	4;4;3	Heat shock protein beta-6	HSPB6	13.634	122	122;160;137	0	22.579	0.75966	0.82331	24.67	0.12294	0.76188	0.75966	0.30353	1.1854	0.82331	30.921	5.1227	24.67	301440000	179680000	121760000	59934000	51737000	8196700	108350000	59010000	49343000	133150000	68935000	64219000
P10253;I3L0S5;I3L3L3	P10253	5;1;1	5;1;1	5;1;1	Lysosomal alpha-glucosidase;76 kDa lysosomal alpha-glucosidase;70 kDa lysosomal alpha-glucosidase	GAA	105.32	952	952;208;284	0	9.0805	0.68854	0.82353	34.16	1.0607	0.35514	0.93196	2.4057	0.59978	0.9899	24.073	28.622	6.0796	32535000	22069000	10466000	3333700	1725500	1608200	21863000	16546000	5316400	7338900	3797600	3541400
A0A5F9ZHP6;A0A5K1VW72;J3QRD1;A0A5F9ZI12;A0A5F9ZHI5;A0A5F9ZGX4;A0A5F9ZHN9;P51648;P51648-2	A0A5F9ZHP6;A0A5K1VW72;J3QRD1;A0A5F9ZI12;A0A5F9ZHI5;A0A5F9ZGX4;A0A5F9ZHN9;P51648;P51648-2	1;1;1;1;1;1;1;1;1	1;1;1;1;1;1;1;1;1	1;1;1;1;1;1;1;1;1	Fatty aldehyde dehydrogenase	ALDH3A2	22.016	195	195;376;393;393;403;460;521;485;508	0.0028612	1.552	0.59075	0.82367	45.169	NaN	NaN	NaN	NaN	NaN	NaN	NaN	NaN	NaN	1375900	837490	538400	466430	287890	178540	0	0	0	909460	549590	359860
F6S8N6;A0A3F2YNX8;A0A0A0MRJ6;P22061;P22061-2	F6S8N6;A0A3F2YNX8;A0A0A0MRJ6;P22061;P22061-2	1;1;1;1;1	1;1;1;1;1	1;1;1;1;1	Protein-L-isoaspartate O-methyltransferase;Protein-L-isoaspartate(D-aspartate) O-methyltransferase	PCMT1	26.626	250	250;250;285;227;228	0	3.0278	0.55669	0.82382	4.0037	NaN	0.53935	0.74336	NaN	0.82829	0.79342	NaN	0.76566	4.8504	5357200	3326400	2030800	571050	359070	211980	2296300	1499700	796550	2489800	1467500	1022300
Q9UHD8-7;Q9UHD8-2;Q9UHD8-5;Q9UHD8;Q9UHD8-3;A0A6Q8PHC2;Q9UHD8-4;Q9UHD8-9;Q9UHD8-8;K7EL40;K7EK18;K7EJV0;K7EJZ2;K7ER52;K7EPY1;K7ENL0;K7EIE4;K7ER14;K7EQD7;K7EKN4;K7EN52;K7ENQ5;K7EJ51	Q9UHD8-7;Q9UHD8-2;Q9UHD8-5;Q9UHD8;Q9UHD8-3;A0A6Q8PHC2;Q9UHD8-4;Q9UHD8-9;Q9UHD8-8	10;10;10;10;8;6;6;6;6;4;3;2;2;2;2;2;2;2;2;1;1;1;1	10;10;10;10;8;6;6;6;6;4;3;2;2;2;2;2;2;2;2;1;1;1;1	10;10;10;10;8;6;6;6;6;4;3;2;2;2;2;2;2;2;2;1;1;1;1	Septin-9	2022-09-09	63.502	567	567;568;579;586;422;290;335;362;474;209;195;125;135;151;151;152;157;159;165;107;115;127;134	0	60.761	0.48636	0.82412	15.235	0.18369	0.46498	0.93422	0.49958	0.78483	1.0062	28.42	13.888	15.481	61432000	40571000	20861000	16757000	13525000	3231900	24220000	16234000	7986800	20455000	10812000	9642300
A0A3B3IS52;A0A3B3IRW2;A0A3B3IRK6;Q13724-2;Q13724	A0A3B3IS52;A0A3B3IRW2;A0A3B3IRK6;Q13724-2;Q13724	1;1;1;1;1	1;1;1;1;1	1;1;1;1;1	Mannosyl-oligosaccharide glucosidase	MOGS	46.485	428	428;562;715;731;837	0.0099564	1.0949	0.53254	0.82418	34.159	NaN	0.5134	1.1275	NaN	0.67632	1.2046	NaN	8.9527	34.478	1951000	1070600	880420	364340	255130	109210	655990	368640	287350	930650	446800	483860
Q09666;E9PJZ0;E9PKR9;E9PJC6;E9PLK4;Q09666-2;E9PQE3	Q09666	190;3;3;3;3;3;2	190;3;3;3;3;3;2	190;3;3;3;3;3;2	Neuroblast differentiation-associated protein AHNAK	AHNAK	629.09	5890	5890;121;123;131;144;149;85	0	323.31	0.50183	0.82435	24.849	0.27716	0.49001	0.80234	0.72711	0.84163	0.85817	23.023	35.819	18.72	4521000000	2865100000	1655900000	1022100000	773790000	248280000	1665500000	1095400000	570090000	1833400000	995970000	837480000
H0YHM7;F8VU90;Q9NYL4-2;Q9NYL4	H0YHM7;F8VU90;Q9NYL4-2;Q9NYL4	1;1;1;1	1;1;1;1	1;1;1;1	Peptidyl-prolyl cis-trans isomerase;Peptidyl-prolyl cis-trans isomerase FKBP11	FKBP11	6.7608	63	63;182;146;201	0.0084361	1.2127	0.52359	0.8244	102.42	NaN	0.88524	1.3053	NaN	1.3886	1.3909	NaN	73.738	166.07	5614900	2853900	2761000	1308800	940430	368410	2347100	1147600	1199600	1958900	765930	1193000
A0A087WZX2;O95139	A0A087WZX2;O95139	1;1	1;1	1;1	NADH dehydrogenase [ubiquinone] 1 beta subcomplex subunit 6	NDUFB6	11.716	97	97;128	0.00079051	1.9771	0.65783	0.82516	30.41	NaN	NaN	NaN	NaN	NaN	NaN	NaN	NaN	NaN	1770100	1030100	739980	0	0	0	777340	415050	362280	992760	615060	377700
H0YMJ8;H0YM54;H0YLZ1;H0YN40;P55010	H0YMJ8;H0YM54;H0YLZ1;H0YN40;P55010	1;1;1;1;1	1;1;1;1;1	1;1;1;1;1	Eukaryotic translation initiation factor 5	EIF5	11.461	101	101;109;146;200;431	0.0099379	1.0904	0.7533	0.8257	13.423	NaN	NaN	NaN	NaN	NaN	NaN	NaN	NaN	NaN	2476200	1525400	950820	712220	456000	256210	761750	509490	252250	1002200	559880	442350
O75489	O75489	1	1	1	NADH dehydrogenase [ubiquinone] iron-sulfur protein 3, mitochondrial	NDUFS3	30.241	264	264	0	3.033	0.57661	0.82593	30.012	NaN	NaN	NaN	NaN	NaN	NaN	NaN	NaN	NaN	1575200	915310	659850	406160	224650	181520	516010	363030	152980	652990	327640	325350
P29966	P29966	12	12	12	Myristoylated alanine-rich C-kinase substrate	MARCKS	31.554	332	332	0	323.31	0.53821	0.82654	7.8278	0.28587	0.49547	0.8531	0.73188	0.8758	0.85143	5.4978	11.803	8.6919	475200000	301830000	173380000	100410000	76093000	24320000	154420000	103220000	51201000	220370000	122520000	97854000
Q13813;Q13813-2;A0A0D9SGF6;A0A1B0GTB7;A0A1B0GUH3;A0A0D9SFH4;A0A5F9ZHC3;A0A0D9SFF6	Q13813;Q13813-2;A0A0D9SGF6	58;57;56;1;1;1;1;1	58;57;56;1;1;1;1;1	1;1;1;0;0;0;0;0	Spectrin alpha chain, non-erythrocytic 1	SPTAN1	284.54	2472	2472;2477;2498;22;51;68;112;153	0	249.53	0.60771	0.8266	19.118	0.24618	0.52506	0.79782	0.64097	0.87857	0.85125	35.545	31.68	17.745	396070000	248290000	147770000	76972000	57854000	19118000	168990000	109320000	59677000	150100000	81121000	68981000
Q13442;F8WBW6	Q13442;F8WBW6	2;1	2;1	2;1	28 kDa heat- and acid-stable phosphoprotein	PDAP1	20.63	181	181;39	0	9.8379	0.59435	0.82826	34.119	0.38607	NaN	NaN	0.79081	NaN	NaN	51.398	NaN	NaN	5097400	3482500	1614900	1942900	1525400	417520	1458200	954970	503260	1696300	1002100	694130
Q8NCW5-2;Q8NCW5	Q8NCW5-2;Q8NCW5	2;2	2;2	2;2	NAD(P)H-hydrate epimerase	APOA1BP	20.43	185	185;288	0	6.5092	0.62727	0.82887	14.603	NaN	NaN	0.95345	NaN	NaN	1.0312	NaN	NaN	16.283	3877500	2291700	1585800	696620	479240	217390	1445200	931500	513660	1735700	880930	854750
H3BS70;Q96DC0;P42126-2;P42126	H3BS70;Q96DC0;P42126-2;P42126	1;1;1;1	1;1;1;1	1;1;1;1	Enoyl-CoA delta isomerase 1, mitochondrial	ECI1;DCI	24.704	224	224;243;285;302	0.00083682	2.2776	0.69665	0.82955	49.265	NaN	NaN	NaN	NaN	NaN	NaN	NaN	NaN	NaN	1118000	579260	538780	0	0	0	488500	291580	196920	629540	287680	341860
Q8WUJ3;Q8WUJ3-2;H0YL56	Q8WUJ3;Q8WUJ3-2	13;9;1	13;9;1	13;9;1	Cell migration-inducing and hyaluronan-binding protein	CEMIP	153	1361	1361;992;145	0	34.03	0.4767	0.83001	41.362	1.2155	0.4119	3.0502	2.7199	0.68817	3.3409	39.997	21.621	43.639	47159000	25698000	21461000	5623800	2447600	3176100	30266000	19670000	10596000	11269000	3580300	7688600
CON__Q03247;P02649	CON__Q03247	3;1	3;1	3;1			35.979	316	316;317	0	2.7959	0.79557	0.83116	33.608	NaN	NaN	0.75136	NaN	NaN	0.79895	NaN	NaN	5.5898	2779600	1404500	1375100	0	0	0	480600	255670	224940	2299000	1148800	1150200
P58546;C9JL85	P58546;C9JL85	2;1	2;1	2;1	Myotrophin	MTPN	12.895	118	118;52	0	96.282	0.42156	0.83151	50.583	0.29675	0.41202	1.5119	0.78988	0.70994	1.5938	54.135	25.528	23.521	34060000	20433000	13627000	8688100	6214800	2473300	14115000	9846000	4268700	11258000	4372600	6885000
P62424;Q5T8U2;Q5T8U3	P62424;Q5T8U2;Q5T8U3	3;2;2	3;2;2	3;2;2	60S ribosomal protein L7a	RPL7A	29.995	266	266;151;191	0	6.6658	0.42892	0.83172	18.056	0.27179	0.50911	NaN	0.72321	0.88907	NaN	17.148	8.6253	NaN	23256000	14495000	8761200	7334700	5421900	1912800	10668000	6610200	4057900	5253600	2463000	2790600
P00558-2;P00558;P07205	P00558-2;P00558	21;21;2	21;21;2	21;21;2	Phosphoglycerate kinase 1	PGK1	41.428	389	389;417;417	0	323.31	0.33552	0.83219	31.897	0.33456	0.27789	1.2541	0.86327	0.46042	1.2683	31.005	34.011	22.007	1146900000	756630000	390270000	257060000	191450000	65613000	515530000	397770000	117760000	374320000	167420000	206900000
P32119;A6NIW5;P32119-2	P32119;A6NIW5	5;3;1	4;3;1	4;3;1	Peroxiredoxin-2	PRDX2	21.892	198	198;136;142	0	18.59	0.40272	0.83301	16.515	0.47322	0.3159	NaN	1.0898	0.54699	NaN	54.514	18.264	NaN	14193000	9052700	5140300	4094000	2670600	1423500	6551900	4897500	1654300	3547100	1484600	2062500
D6R938;E9PBG7;E9PF82;Q13557-8;Q13557-12;Q13557-10;Q13557;Q13557-6;Q13557-11;Q13557-9;Q13557-5;Q13557-3;Q13557-4;H0Y9J2;H0Y9C2;H7BXS4;A0A5F9ZHY2;A0A5K1VW76;Q8WU40;A0A804HIC9;A0A5F9ZHM9;A0A5F9ZH21;A0A5F9ZHR5;Q5SWX3;D6RFJ0;A0A2Q3DQE3;A0A5F9ZH50;H0Y6G2;Q13554-7;Q9UQM7;Q13554-4;Q9UQM7-2;Q13554-6;Q13555-10;Q13554-3;Q13554-8;Q13554-5;Q13555-3;Q13555-5;Q13555-4;Q13555-7;Q13555-11;Q13555-9;Q13554-2;Q13555…	D6R938;E9PBG7;E9PF82;Q13557-8;Q13557-12;Q13557-10;Q13557;Q13557-6;Q13557-11;Q13557-9;Q13557-5;Q13557-3;Q13557-4;H0Y9J2	5;5;5;5;5;5;5;5;5;4;4;4;4;3;2;1;1;1;1;1;1;1;1;1;1;1;1;1;1;1;1;1;1;1;1;1;1;1;1;1;1;1;1;1;1;1;1;1;1	5;5;5;5;5;5;5;5;5;4;4;4;4;3;2;1;1;1;1;1;1;1;1;1;1;1;1;1;1;1;1;1;1;1;1;1;1;1;1;1;1;1;1;1;1;1;1;1;1	5;5;5;5;5;5;5;5;5;4;4;4;4;3;2;1;1;1;1;1;1;1;1;1;1;1;1;1;1;1;1;1;1;1;1;1;1;1;1;1;1;1;1;1;1;1;1;1;1	Calcium/calmodulin-dependent protein kinase type II subunit delta	CAMK2D	56.298	498	498;512;533;478;478;492;499;513;524;489;498;510;519;182;194;362;362;421;453;458;467;478;489;516;548;556;559;588;449;478;479;489;492;495;503;517;518;524;527;529;533;539;542;542;547;556;558;588;666	0	323.31	0.62627	0.83355	7.2843	0.2823	0.42309	0.92495	0.62998	0.76286	1.0054	36.16	10.879	18.233	38631000	22886000	15745000	5155700	3865500	1290200	15941000	10430000	5511300	17534000	8591000	8943400
Q06323-3;Q06323;Q06323-2;H0YKK6;H0YLU2	Q06323-3;Q06323;Q06323-2	6;6;6;1;1	6;6;6;1;1	6;6;6;1;1	Proteasome activator complex subunit 1	PSME1	26.87	233	233;249;250;90;114	0	14.785	0.62657	0.83374	26.741	0.40529	0.52366	0.76551	1.1231	0.89347	0.78477	15.391	35.746	5.696	36350000	22540000	13810000	4586200	3297500	1288600	12200000	7912200	4287300	19564000	11330000	8233700
P51149;A0A6Q8PGE6;A0A6Q8PG52;A0A6Q8PH84;C9J4V0;C9J592;C9IZZ0;C9J8S3;C9J4S4;C9J7D1;A0A6Q8PF79	P51149;A0A6Q8PGE6;A0A6Q8PG52;A0A6Q8PH84;C9J4V0;C9J592;C9IZZ0;C9J8S3;C9J4S4	8;7;7;7;5;5;5;5;4;2;1	8;7;7;7;5;5;5;5;4;2;1	8;7;7;7;5;5;5;5;4;2;1	Ras-related protein Rab-7a	RAB7A	23.489	207	207;183;211;217;134;150;156;160;98;91;66	0	33.991	0.6061	0.83391	16.806	0.3049	0.60727	0.67632	0.7628	0.96002	0.7424	40.869	15.205	7.2987	55495000	34040000	21455000	7056000	5075500	1980500	21681000	13377000	8304300	26758000	15588000	11171000
P35908;CON__P35908	P35908;CON__P35908	18;17	16;15	10;9	Keratin, type II cytoskeletal 2 epidermal	KRT2	65.432	639	639;645	0	323.31	0.4601	0.83409	45.374	0.44932	0.4681	1.4625	1.0345	0.78105	1.5825	30.957	40.696	61.653	130430000	72806000	57622000	17620000	11231000	6388400	48414000	32275000	16139000	64395000	29301000	35095000
Q12765;Q12765-2;C9K052;B8ZZP4;C9J7U9;Q12765-3	Q12765;Q12765-2;C9K052;B8ZZP4;C9J7U9;Q12765-3	6;6;4;3;3;3	6;6;4;3;3;3	6;6;4;3;3;3	Secernin-1	SCRN1	46.382	414	414;434;245;140;141;346	0	15.936	0.75227	0.83459	10.797	0.29261	0.73463	0.81661	0.71796	1.1427	0.87613	7.1299	51.751	7.1955	44541000	24501000	20040000	7390400	5585400	1805000	16022000	7638500	8383300	21129000	11277000	9851700
A0A2R8YD12;A0A024QZX5;A0A087X1N8;P35237;A0A2R8Y6A7	A0A2R8YD12;A0A024QZX5;A0A087X1N8;P35237	5;5;5;5;2	5;5;5;5;2	5;5;5;5;2	Serpin B6	SERPINB6	38.124	332	332;380;395;376;171	0	15.124	0.5247	0.83493	5.41	0.33585	0.53201	0.70366	0.8525	0.84617	0.75435	11.477	5.0856	8.5744	20228000	12417000	7811200	4679400	3359700	1319800	6567800	4117600	2450200	8981000	4939700	4041200
P63173;J3KT73;J3QL01	P63173;J3KT73;J3QL01	2;1;1	2;1;1	2;1;1	60S ribosomal protein L38	RPL38	8.2178	70	70;64;67	0.0088608	1.1495	0.60998	0.83578	0.95044	NaN	NaN	0.97092	NaN	NaN	1.0179	NaN	NaN	28.829	7799900	4466400	3333600	691140	399870	291260	1511000	988120	522840	5597800	3078400	2519500
P62140;C9J9S3;C9JP48;E7ETD8;F8VR82;F8VYE8;F8W0W8;A0A7I2V4F7;P62136-3;P36873;P62136;P36873-2;P62136-2;H0Y3Y6;F8W1A0	P62140;C9J9S3;C9JP48;E7ETD8;F8VR82;F8VYE8;F8W0W8;A0A7I2V4F7;P62136-3;P36873;P62136;P36873-2;P62136-2	4;2;2;2;2;2;2;2;2;2;2;2;2;1;1	4;2;2;2;2;2;2;2;2;2;2;2;2;1;1	4;2;2;2;2;2;2;2;2;2;2;2;2;1;1	Serine/threonine-protein phosphatase PP1-beta catalytic subunit;Serine/threonine-protein phosphatase;Serine/threonine-protein phosphatase PP1-alpha catalytic subunit;Serine/threonine-protein phosphatase PP1-gamma catalytic subunit	PPP1CB;PPP1CC;PPP1CA	37.186	327	327;125;138;169;270;304;332;335;286;323;330;337;341;82;83	0	34.973	0.65821	0.83581	23.697	0.27419	0.34931	1.1256	0.57716	0.57087	1.2062	41.796	10.3	12.335	10394000	6623400	3770800	2358200	1865300	492890	3551800	2421600	1130200	4484300	2336500	2147800
B8ZZL8;P61604;B8ZZ54;S4R3N1	B8ZZL8;P61604;B8ZZ54;S4R3N1	2;2;1;1	2;2;1;1	2;2;1;1	10 kDa heat shock protein, mitochondrial	HSPE1;HSPE1-MOB4	10.689	101	101;102;47;261	0	2.4227	0.50849	0.837	23.363	NaN	0.50849	NaN	NaN	0.837	NaN	NaN	8.6024	NaN	18053000	11099000	6953700	5435000	4439300	995770	5184000	3301800	1882200	7433500	3357800	4075700
J3QS39;J3QTR3;F5H6Q2;F5GYU3;F5H2Z3;F5H265;B4DV12;F5H388;F5H747;F5GXK7;J3QKN0;Q5PY61;Q96C32;P62987;P62979;P0CG47;P0CG48;M0R1V7;M0R1M6;M0R2S1;A0A2R8Y422;J3QSA3;F5GZ39	J3QS39;J3QTR3;F5H6Q2;F5GYU3;F5H2Z3;F5H265;B4DV12;F5H388;F5H747;F5GXK7;J3QKN0;Q5PY61;Q96C32;P62987;P62979;P0CG47;P0CG48;M0R1V7;M0R1M6;M0R2S1;A0A2R8Y422;J3QSA3;F5GZ39	4;4;4;4;4;4;4;4;4;4;4;4;4;4;4;4;4;3;3;3;3;2;2	4;4;4;4;4;4;4;4;4;4;4;4;4;4;4;4;4;3;3;3;3;2;2	4;4;4;4;4;4;4;4;4;4;4;4;4;4;4;4;4;3;3;3;3;2;2	Ubiquitin-60S ribosomal protein L40;Ubiquitin;60S ribosomal protein L40;Ubiquitin-40S ribosomal protein S27a;Ubiquitin;40S ribosomal protein S27a;Polyubiquitin-B;Ubiquitin;Polyubiquitin-C;Ubiquitin	UBB;RPS27A;UBC;UBA52	10.469	93	93;106;122;134;136;149;153;155;160;169;206;229;305;128;156;229;685;63;114;138;156;43;61	0	206.78	0.53893	0.83715	14.75	0.30987	0.40365	1.1044	0.78831	0.77527	1.1496	3.5656	7.7624	16.128	236220000	152880000	83333000	27336000	20686000	6650100	110890000	82921000	27972000	97986000	49275000	48711000
P21281;E5RGH6;H0YC04;H0YAT8	P21281;E5RGH6;H0YC04	3;2;2;1	3;2;2;1	3;2;2;1	V-type proton ATPase subunit B, brain isoform	ATP6V1B2	56.5	511	511;66;199;56	0	4.6132	0.64213	0.83758	25.14	NaN	0.71144	NaN	NaN	0.95067	NaN	NaN	19.682	NaN	3327400	2003800	1323600	0	0	0	2032400	1190600	841810	1294900	813150	481770
H7BY10;K7EJV9;K7ERT8;A8MUS3;P62750;K7EMA7	H7BY10;K7EJV9;K7ERT8;A8MUS3;P62750;K7EMA7	2;2;2;2;2;1	2;2;2;2;2;1	2;2;2;2;2;1	60S ribosomal protein L23a	RPL23A	17.692	158	158;170;175;194;156;70	0	8.0016	0.55229	0.83883	10.558	0.29146	0.45664	0.98104	0.77124	0.78146	1.0595	0.68915	0.53853	2.4257	32608000	19727000	12880000	8652200	6515400	2136800	11272000	7475500	3796500	12683000	5736500	6946900
O60664-4;O60664;O60664-3;K7ERZ3;K7EL96;K7ER39;O60664-2;K7EJD0	O60664-4;O60664;O60664-3;K7ERZ3;K7EL96	16;16;15;10;9;6;5;1	16;16;15;10;9;6;5;1	16;16;15;10;9;6;5;1	Perilipin-3	PLIN3	45.803	422	422;434;433;292;172;168;251;35	0	143.19	0.7026	0.83895	17.044	0.24133	0.73785	0.73311	0.66516	1.2299	0.78737	49.566	17.748	11.613	227100000	139030000	88070000	47948000	37303000	10645000	76930000	43249000	33681000	102220000	58475000	43744000
P40926-2;P40926;G3XAL0	P40926-2;P40926;G3XAL0	10;10;6	10;10;6	10;10;6	Malate dehydrogenase, mitochondrial;Malate dehydrogenase	MDH2	30.875	296	296;338;231	0	34.032	0.75106	0.84048	26.342	0.2738	0.76126	0.76553	0.64689	1.2649	0.82217	46.496	23.916	12.276	92316000	55566000	36750000	23688000	18467000	5221400	25624000	14464000	11159000	43004000	22634000	20369000
Q9UHV9	Q9UHV9	2	2	2	Prefoldin subunit 2	PFDN2	16.648	154	154	0.0028551	1.5379	0.59471	0.84054	56.9	NaN	NaN	NaN	NaN	NaN	NaN	NaN	NaN	NaN	1338700	1000200	338530	1033100	857600	175550	0	0	0	305590	142610	162980
P45974-2;P45974;F5H571	P45974-2;P45974	7;7;1	7;7;1	7;7;1	Ubiquitin carboxyl-terminal hydrolase 5	USP5	93.307	835	835;858;137	0	32.079	0.67011	0.84241	10.825	0.44882	0.63732	0.71948	0.84345	1.0102	0.75947	15.655	12.88	12.703	19440000	11536000	7904500	2751000	1916500	834520	5780000	3443300	2336800	10909000	6176100	4733200
H3BTL1;Q9GZQ8;A6NCE7	H3BTL1;Q9GZQ8;A6NCE7	1;1;1	1;1;1	1;1;1	Microtubule-associated proteins 1A/1B light chain 3B;Microtubule-associated proteins 1A/1B light chain 3 beta 2	MAP1LC3B;MAP1LC3B2	9.0115	75	75;125;125	0.0015117	1.7661	0.40823	0.84245	76.655	0.28307	NaN	NaN	0.58507	NaN	NaN	51.56	NaN	NaN	3860600	1855200	2005400	1539000	1093000	446040	0	0	0	2321600	762200	1559400
F8VQE1;Q9UHB6-2;Q9UHB6-5;Q9UHB6;Q9UHB6-4;F8VS07;Q9UHB6-3;F8VRN8	F8VQE1;Q9UHB6-2;Q9UHB6-5;Q9UHB6;Q9UHB6-4;F8VS07;Q9UHB6-3;F8VRN8	6;6;6;6;6;4;4;3	6;6;6;6;6;4;4;3	6;6;6;6;6;4;4;3	LIM domain and actin-binding protein 1	LIMA1	66.99	598	598;599;600;759;760;456;457;388	0	75.252	0.40198	0.84279	39.293	0.3577	0.38667	1.1376	0.98181	0.67638	1.2193	50.371	17.238	88.247	20970000	11784000	9186700	4378700	3010300	1368400	7768700	5560400	2208300	8823000	3213000	5610000
P49411	P49411	5	5	5	Elongation factor Tu, mitochondrial	TUFM	49.541	452	452	0	10.35	0.54021	0.84299	28.056	0.24867	0.63152	0.66389	0.57137	1.088	0.70726	35.931	25.226	20.55	20978000	13789000	7189400	4484900	3454400	1030500	3851800	2298400	1553400	12641000	8035800	4605500
A0A6I8PLB3;A0A6I8PS05;A0A6I8PRS0;A0A6I8PL42;B4DER1;A0A6I8PIT3;A0A6I8PIV1;Q9P2J5-2;Q9P2J5;A0A6I8PLB8;A0A6I8PIP7;Q9P2J5-3;A0A6I8PRU9;A0A6I8PTV8	A0A6I8PLB3;A0A6I8PS05;A0A6I8PRS0;A0A6I8PL42;B4DER1;A0A6I8PIT3;A0A6I8PIV1;Q9P2J5-2;Q9P2J5;A0A6I8PLB8;A0A6I8PIP7;Q9P2J5-3	5;5;5;5;5;5;5;5;5;4;3;3;2;2	5;5;5;5;5;5;5;5;5;4;3;3;2;2	5;5;5;5;5;5;5;5;5;4;3;3;2;2	Leucine--tRNA ligase, cytoplasmic	LARS	117.14	1024	1024;1049;1121;1130;1149;1164;1175;1122;1176;1112;850;485;543;697	0	19.348	0.58826	0.84341	39.688	0.33616	0.58826	NaN	0.59961	0.84341	NaN	37.298	33.007	NaN	5971600	3741400	2230100	1376400	1059700	316640	4595200	2681700	1913500	0	0	0
A0A3B3IT15;A0A3B3IS84;P53621;P53621-2;A0A3B3ISC6;A0A3B3IU89;A0A3B3ITV3;A0A3B3ISK1;A0A3B3ITI7;A0A3B3IU78	A0A3B3IT15;A0A3B3IS84;P53621;P53621-2;A0A3B3ISC6;A0A3B3IU89;A0A3B3ITV3	10;10;10;10;9;6;5;4;3;1	10;10;10;10;9;6;5;4;3;1	10;10;10;10;9;6;5;4;3;1	Coatomer subunit alpha;Xenin;Proxenin	COPA	136.02	1204	1204;1204;1224;1233;1024;682;609;455;452;121	0	26.394	0.61698	0.84392	61.096	0.39362	0.60416	0.85107	0.92763	0.98089	0.89251	14.767	128.08	8.1873	112000000	91344000	20653000	19715000	13502000	6213300	79690000	71288000	8401500	12592000	6553700	6038300
B1AHC9;P12956;P12956-2	B1AHC9;P12956;P12956-2	9;9;7	9;9;7	9;9;7	X-ray repair cross-complementing protein 6	XRCC6	64.283	559	559;609;568	0	58.854	0.53626	0.844	23.536	0.38817	0.52688	0.71872	0.82449	0.90132	0.77521	57.438	22.309	12.144	25989000	17153000	8836800	6279200	4504900	1774200	14738000	9811600	4926200	4972500	2836000	2136500
P60174;P60174-3;P60174-4;U3KPZ0;U3KQF3;U3KPS5	P60174;P60174-3;P60174-4	15;15;10;7;6;3	15;15;10;7;6;3	15;15;10;7;6;3	Triosephosphate isomerase	TPI1	26.669	249	249;286;167;113;98;38	0	295.71	0.3383	0.84461	25.271	0.3116	0.26122	1.1514	0.83345	0.48285	1.164	18.437	17.042	16.945	774350000	487770000	286580000	166760000	126510000	40250000	229120000	180170000	48946000	378470000	181090000	197380000
A0A7I2V2Q9;A0A7I2V3W9;H0YBR5;A0A7I2V570;A0A161SXE1;A0A7I2V429;H0YBP5;A0A7I2V4G3;B3KW56;A0A7I2V3I2;A0A7I2V5Z6;A0A7I2V2W0;A0A7I2V2H9;A0A7I2V4B4;A0A7I2V3I0;A0A7I2V3S3;P60228	A0A7I2V2Q9;A0A7I2V3W9;H0YBR5;A0A7I2V570;A0A161SXE1;A0A7I2V429;H0YBP5;A0A7I2V4G3;B3KW56;A0A7I2V3I2;A0A7I2V5Z6;A0A7I2V2W0;A0A7I2V2H9;A0A7I2V4B4;A0A7I2V3I0;A0A7I2V3S3;P60228	1;1;1;1;1;1;1;1;1;1;1;1;1;1;1;1;1	1;1;1;1;1;1;1;1;1;1;1;1;1;1;1;1;1	1;1;1;1;1;1;1;1;1;1;1;1;1;1;1;1;1	Eukaryotic translation initiation factor 3 subunit E	EIF3E	12.192	103	103;122;123;172;172;182;332;339;396;396;416;446;452;455;472;507;445	0	2.309	0.46171	0.84592	18.157	NaN	NaN	NaN	NaN	NaN	NaN	NaN	NaN	NaN	3496600	2282400	1214200	1098500	827690	270770	2398200	1454700	943450	0	0	0
J3QSB7;B4DUC8;Q13126-7;Q13126-4;Q13126;Q13126-6;Q13126-5;Q13126-3;Q13126-2;F8WES2;J3KRN1;F2Z2F3	J3QSB7;B4DUC8;Q13126-7;Q13126-4;Q13126;Q13126-6;Q13126-5;Q13126-3;Q13126-2;F8WES2;J3KRN1;F2Z2F3	2;2;2;2;2;2;2;2;2;1;1;1	2;2;2;2;2;2;2;2;2;1;1;1	2;2;2;2;2;2;2;2;2;1;1;1	Purine nucleoside phosphorylase;S-methyl-5-thioadenosine phosphorylase	MTAP	26.777	242	242;300;239;280;283;293;305;334;346;50;112;143	0	2.339	0.59646	0.84622	15.372	NaN	0.59646	NaN	NaN	0.84622	NaN	NaN	15.372	NaN	1693600	1171300	522300	211600	211600	0	1482000	959670	522300	0	0	0
Q92743;A0A3B3IU24;H0Y7G9	Q92743;A0A3B3IU24	4;2;1	4;2;1	4;2;1	Serine protease HTRA1	HTRA1	51.286	480	480;374;221	0	66.722	0.49756	0.84643	102.31	1.4218	0.48378	0.50156	3.3567	0.84192	0.54062	33.871	64.771	5.4996	37580000	22969000	14611000	5199500	2233000	2966500	16934000	11412000	5521500	15446000	9323700	6122600
H3BR27;A0A1B0GUK8;H0Y6E7;H3BT71;P38159-3;Q96E39;P38159;H3BNC1;P38159-2;O75526;Q8N7X1	H3BR27;A0A1B0GUK8;H0Y6E7;H3BT71;P38159-3;Q96E39;P38159;H3BNC1;P38159-2;O75526;Q8N7X1	2;2;2;2;2;2;2;1;1;1;1	2;2;2;2;2;2;2;1;1;1;1	2;2;2;2;2;2;2;1;1;1;1	RNA-binding motif protein, X chromosome;RNA-binding motif protein, X chromosome, N-terminally processed;RNA binding motif protein, X-linked-like-1;RNA-binding motif protein, X-linked-like-2;RNA-binding motif protein, X-linked-like-3	RBMX;RBMXL1;RBMXL2;RBMXL3	8.6098	78	78;158;292;296;196;390;391;37;378;392;1067	0	3.5785	0.48817	0.84662	25.333	0.44754	NaN	NaN	0.87386	NaN	NaN	4.4797	NaN	NaN	2969900	2070600	899300	1915600	1306100	609560	0	0	0	1054300	764590	289740
O95747;C9JIG9	O95747	5;2	5;2	5;2	Serine/threonine-protein kinase OSR1	OXSR1	58.022	527	527;468	0	35.593	0.57859	0.84693	13.777	0.53123	0.38019	1.013	0.99304	0.5947	1.0907	23.619	8.28	20.009	16276000	9855700	6420800	2267400	1393000	874440	5296600	3660300	1636300	8712500	4802400	3910100
P15374;A0A087WTB8;Q5TBK7;O75420	P15374;A0A087WTB8;Q5TBK7	4;3;3;1	4;3;3;1	4;3;3;1	Ubiquitin carboxyl-terminal hydrolase isozyme L3;Ubiquitin carboxyl-terminal hydrolase	UCHL3	26.182	230	230;194;228;1035	0	4.4029	0.54592	0.84718	80.821	NaN	NaN	0.76082	NaN	NaN	0.82829	NaN	NaN	139.83	7651900	4485900	3166000	945590	638910	306690	345640	177320	168320	6360600	3669600	2691000
H0YHI8;A0A3B3ISH4;O14974-5;O14974-2;O14974;H0YIS4;F8VZN8;O14974-4;O14974-3	H0YHI8;A0A3B3ISH4;O14974-5;O14974-2;O14974;H0YIS4;F8VZN8;O14974-4;O14974-3	2;2;2;2;2;1;1;1;1	2;2;2;2;2;1;1;1;1	2;2;2;2;2;1;1;1;1	Protein phosphatase 1 regulatory subunit 12A	PPP1R12A	40.504	367	367;381;943;995;1030;299;692;971;974	0	4.8206	0.52068	0.84812	36.813	0.42732	0.82031	NaN	0.81431	1.2257	NaN	2.5269	48.854	NaN	3326100	2064800	1261300	1341600	1051300	290320	1984500	1013500	970970	0	0	0
P56537;P56537-2;A0A0U1RQV5	P56537;P56537-2	3;2;1	3;2;1	3;2;1	Eukaryotic translation initiation factor 6	EIF6	26.599	245	245;226;110	0	2.5763	0.61077	0.84819	20.301	0.39971	NaN	0.94917	0.75734	NaN	1.0371	15.897	NaN	14.472	5628100	3033800	2594300	1495700	1033000	462700	635720	398940	236780	3496600	1601800	1894800
M0R0Y2;P54920;M0R2M1;M0QZM9;M0QZN5;M0R031;M0R213;M0R027;M0R058;A0A087WZQ7;Q9H115-3;Q9H115-2;Q9H115	M0R0Y2;P54920;M0R2M1	3;3;2;1;1;1;1;1;1;1;1;1;1	3;3;2;1;1;1;1;1;1;1;1;1;1	3;3;2;1;1;1;1;1;1;1;1;1;1	Alpha-soluble NSF attachment protein	NAPA	29.163	256	256;295;268;35;60;74;83;102;137;302;204;259;298	0	4.3349	1.2769	0.84841	53.658	NaN	0.96295	NaN	NaN	1.3266	NaN	NaN	63.217	NaN	2458400	1286600	1171800	0	0	0	2246100	1181800	1064300	212240	104800	107450
F2Z3J9;Q14914-2;Q14914	F2Z3J9;Q14914-2;Q14914	2;2;2	2;2;2	2;2;2	Prostaglandin reductase 1	PTGR1	32.729	300	300;301;329	0.0027759	1.4455	0.60982	0.84897	23.535	NaN	NaN	NaN	NaN	NaN	NaN	NaN	NaN	NaN	7231800	3737800	3494000	0	0	0	2515400	1662300	853080	4716400	2075500	2641000
P07384;E9PLX0;E9PJJ3;E9PLC9;E9PMC6;E9PJA6;E9PSA6;E9PL37;E9PQB3;E9PRM1;E9PIA9	P07384	9;2;2;2;2;2;2;2;2;2;1	8;2;2;2;2;2;2;2;2;2;1	8;2;2;2;2;2;2;2;2;2;1	Calpain-1 catalytic subunit	CAPN1	81.889	714	714;122;135;148;152;161;163;191;191;201;63	0	9.7953	0.64521	0.84981	14.038	0.32763	0.61251	0.70583	0.62559	0.99015	0.73472	22.438	15.507	17.242	20260000	12262000	7998300	2353300	1795400	557840	11160000	6540200	4619400	6747400	3926300	2821100
B8ZZQ6;P06454-2;P06454;B8ZZA1;B8ZZW7;H7C2N1	B8ZZQ6;P06454-2;P06454;B8ZZA1;B8ZZW7;H7C2N1	4;4;4;3;3;3	4;4;4;3;3;3	4;4;4;3;3;3	Prothymosin alpha;Prothymosin alpha, N-terminally processed;Thymosin alpha-1	PTMA	11.758	107	107;110;111;131;136;148	0	159.5	0.51282	0.85046	19.419	0.46735	0.2534	0.80462	1.1496	0.44388	0.84608	15.549	54.866	1.2894	65339000	41316000	24023000	16413000	10698000	5715200	29112000	20194000	8917800	19813000	10423000	9390000
A0A7I2V5S2;A0A7I2YQC0;P06748-2;P06748;P06748-3;A0A7I2V4G8;A0A7I2V5J8;E5RI98;A0A7I2V433;A0A7I2V2X9;A0A7I2V3U2;A0A7I2V3G5;A0A7I2V579;E5RGW4	A0A7I2V5S2;A0A7I2YQC0;P06748-2;P06748;P06748-3;A0A7I2V4G8;A0A7I2V5J8;E5RI98;A0A7I2V433;A0A7I2V2X9;A0A7I2V3U2	8;8;8;8;6;5;5;5;4;4;4;3;3;2	8;8;8;8;6;5;5;5;4;4;4;3;3;2	8;8;8;8;6;5;5;5;4;4;4;3;3;2	Nucleophosmin	NPM1	33.875	305	305;323;265;294;259;123;201;230;156;175;195;90;99;59	0	17.041	0.45574	0.85067	14.843	0.34667	0.45574	0.82268	0.89738	0.80051	0.81943	10.812	9.0457	21.712	156020000	96727000	59291000	41005000	29688000	11317000	45351000	30523000	14828000	69662000	36517000	33145000
M0QXB4;O14579;O14579-2;O14579-3;M0R061	M0QXB4;O14579;O14579-2;O14579-3	5;5;4;3;2	5;5;4;3;2	5;5;4;3;2	Coatomer subunit epsilon	COPE	36.923	331	331;308;257;256;146	0	4.2114	0.55772	0.85151	10.401	NaN	NaN	NaN	NaN	NaN	NaN	NaN	NaN	NaN	1726100	1092400	633800	631770	473920	157860	650210	391170	259030	444170	227260	216900
P63000;P63000-2;P60763;P15153;J3KSC4;J3QLK0;B1AH77;B1AH78;B1AH80;A0A3B3IRV0;F8WET9;B1AH79;A0A494C1M1;G3V4H1;A0A494BZX6;G3V476;Q9H4E5-2;P17081;Q9H4E5	P63000;P63000-2;P60763;P15153	6;6;4;3;2;2;2;2;2;1;1;1;1;1;1;1;1;1;1	5;5;3;2;2;2;2;1;2;0;0;0;0;0;0;0;0;0;0	5;5;3;2;2;2;2;1;2;0;0;0;0;0;0;0;0;0;0	Ras-related C3 botulinum toxin substrate 1;Ras-related C3 botulinum toxin substrate 3;Ras-related C3 botulinum toxin substrate 2	RAC1;RAC3;RAC2	21.45	192	192;211;192;192;130;136;148;166;185;41;50;86;115;153;156;178;192;205;214	0	4.9656	0.50412	0.8526	12.336	0.23675	0.50412	0.90616	0.63479	0.8526	0.94298	23.205	33.317	2.9182	64996000	43482000	21514000	17943000	13394000	4549100	28722000	19829000	8893200	18331000	10259000	8071700
P07814;V9GYZ6	P07814;V9GYZ6	10;5	10;5	10;5	Bifunctional glutamate/proline--tRNA ligase;Glutamate--tRNA ligase;Proline--tRNA ligase	EPRS	170.59	1512	1512;968	0	37.296	0.55141	0.8528	28.985	0.32936	0.55141	0.97241	0.80221	0.8528	1.0287	32.823	37.507	6.7379	27029000	16283000	10745000	7832300	5446200	2386100	10778000	6363200	4414600	8418400	4473900	3944500
A0A7I2YQN2;O60506-4;O60506-3;A0A7I2V346;A0A7I2V4Z0;O60506-2;O60506;B7Z645;A0A7I2YQV8;A0A7I2V5Q6;A0A7I2V2F2;A0A7I2V309;O60506-5;F6UXX1;A0A7I2V4J0;H0YAA0	A0A7I2YQN2;O60506-4;O60506-3;A0A7I2V346;A0A7I2V4Z0;O60506-2;O60506;B7Z645;A0A7I2YQV8;A0A7I2V5Q6;A0A7I2V2F2;A0A7I2V309;O60506-5	13;13;13;12;12;12;12;10;10;9;9;9;9;5;3;1	13;13;13;12;12;12;12;10;10;9;9;9;9;5;3;1	11;11;11;10;10;10;10;8;9;7;7;7;7;5;3;1	Heterogeneous nuclear ribonucleoprotein Q	SYNCRIP	62.527	561	561;527;562;524;545;588;623;464;465;337;490;525;410;185;165;97	0	26.807	0.55586	0.85284	11.228	0.35101	0.52693	0.83803	0.70854	0.88184	0.89773	23.937	10.378	13.374	48404000	31014000	17390000	13692000	10076000	3615100	21169000	13575000	7593200	13544000	7362100	6181800
F5H365;Q15436;Q15436-2;G3V5X8;G3V4Q2;G3V4V1;G3V1W4;G3V3G5;G3V2R6;G3V5K1	F5H365;Q15436;Q15436-2	6;6;4;2;2;2;2;2;2;1	6;6;4;2;2;2;2;2;2;1	6;6;4;2;2;2;2;2;2;1	Protein transport protein Sec23A	SEC23A	82.968	736	736;765;563;85;86;93;108;140;169;40	0	12.056	0.49457	0.85313	28.965	0.37815	0.57096	1.222	0.77571	0.88323	1.3056	14.428	14.733	32.961	9094000	5230700	3863300	3362500	2569300	793170	2395700	1451800	943920	3335800	1209600	2126200
O14613	O14613	1	1	1	Cdc42 effector protein 2	CDC42EP2	22.483	210	210	0	2.6286	0.78181	0.85372	65.327	NaN	NaN	NaN	NaN	NaN	NaN	NaN	NaN	NaN	2483300	1546000	937310	615260	494570	120690	835480	474590	360890	1032500	576790	455730
H0YJB9;G3V4C6;Q9Y224	H0YJB9;G3V4C6;Q9Y224	2;2;2	2;2;2	2;2;2	UPF0568 protein C14orf166	C14orf166	14.726	129	129;193;244	0	2.3494	0.59933	0.85392	47.187	NaN	0.59933	NaN	NaN	0.85392	NaN	NaN	47.187	NaN	1519900	963290	556660	0	0	0	1519900	963290	556660	0	0	0
B7Z8J4;A0A7I2V4Y5;A0A7I2V3U5;A0A7I2V3X4;A0A7I2V539;P30419;K7EN82;P30419-2;K7EN42;A0A7I2V3M5	B7Z8J4;A0A7I2V4Y5;A0A7I2V3U5;A0A7I2V3X4;A0A7I2V539;P30419;K7EN82;P30419-2	3;3;3;3;3;3;2;2;1;1	3;3;3;3;3;3;2;2;1;1	3;3;3;3;3;3;2;2;1;1	Glycylpeptide N-tetradecanoyltransferase 1	NMT1	15.161	137	137;198;393;478;494;496;72;416;88;88	0	123.75	0.5444	0.85519	32.878	0.43487	NaN	0.81195	0.83379	NaN	0.84544	26.649	NaN	24.893	10715000	6262700	4452800	2235400	1609000	626470	1596000	813000	783040	6884000	3840700	3043300
Q04941	Q04941	1	1	1	Proteolipid protein 2	PLP2	16.691	152	152	0.0008058	2.0854	0.4892	0.85576	63.3	NaN	NaN	NaN	NaN	NaN	NaN	NaN	NaN	NaN	16847000	11077000	5769700	2977400	1874500	1102900	5062500	3212200	1850200	8807000	5990500	2816500
P06733;A0A2R8Y6G6;P06733-2;K7EM90;A0A2R8YEM5;A0A2R8Y879;K7ERS8;A0A2R8Y6I8;A0A2R8Y798;A0A2R8YEG5;E5RGZ4;E5RI09;E5RG95;K7EPM1;K7EKN2	P06733;A0A2R8Y6G6;P06733-2	21;18;13;10;9;8;5;4;3;3;2;1;1;1;1	21;18;13;10;9;8;5;4;3;3;2;1;1;1;1	19;16;12;9;8;7;4;4;2;2;0;0;0;0;0	Alpha-enolase	ENO1	47.168	434	434;434;341;195;171;125;83;33;70;101;283;148;154;196;212	0	323.31	0.46566	0.85589	60.596	0.41635	0.28572	1.0687	1.0142	0.47642	1.0822	36.372	50.653	20.189	1789900000	1120100000	669800000	319720000	222530000	97198000	637930000	498000000	139930000	832220000	399560000	432670000
P14618;P14618-3;B4DNK4	P14618;P14618-3;B4DNK4	25;21;20	25;21;20	2;2;2	Pyruvate kinase PKM;Pyruvate kinase	PKM	57.936	531	531;516;457	0	323.31	0.52043	0.85628	24.221	0.50693	0.43117	0.82953	1.2346	0.75593	0.84343	22.681	32.534	22.823	2452900000	1529400000	923490000	512240000	351370000	160870000	873080000	609670000	263410000	1067600000	568400000	499210000
A2AB88;O15212	A2AB88;O15212	1;1	1;1	1;1	Prefoldin subunit 6	PFDN6	11.561	103	103;129	0.0084801	1.2381	0.53655	0.85767	28.207	NaN	NaN	NaN	NaN	NaN	NaN	NaN	NaN	NaN	1281300	784190	497130	712190	521940	190250	569120	262250	306880	0	0	0
O95980	O95980	6	6	6	Reversion-inducing cysteine-rich protein with Kazal motifs	RECK	106.46	971	971	0	26.09	0.56257	0.85823	27.005	0.25039	0.58589	NaN	0.51568	0.89633	NaN	18.748	22.03	NaN	11133000	6987900	4144700	1913800	1448700	465110	8701700	5206400	3495300	517090	332760	184330
B5MDF5;P62826;J3KQE5;F5H018;H0YFC6;B4DV51;A0A087X0W0	B5MDF5;P62826;J3KQE5;F5H018	5;5;4;3;2;2;1	5;5;4;3;2;2;1	5;5;4;3;2;2;1	GTP-binding nuclear protein Ran	RAN	26.224	233	233;216;234;198;103;128;53	0	12.233	0.49158	0.85918	9.0934	0.28686	0.55443	0.70374	0.73876	0.96948	0.77624	18.08	11.514	10.412	81432000	55421000	26011000	30354000	23417000	6937700	23414000	15331000	8082700	27664000	16673000	10991000
P20337	P20337	1	1	1	Ras-related protein Rab-3B	RAB3B	24.758	219	219	0.0047554	1.3742	0.47984	0.85953	58.734	NaN	NaN	NaN	NaN	NaN	NaN	NaN	NaN	NaN	2595900	1723800	872090	1176700	895260	281460	1419200	828550	590630	0	0	0
P26022	P26022	2	2	2	Pentraxin-related protein PTX3	PTX3	41.975	381	381	0	3.8596	0.53655	0.86044	4.8289	0.36713	0.62135	NaN	0.72304	0.92722	NaN	8.2913	15.4	NaN	5685500	3400600	2284800	2092800	1537500	555250	1950300	1233700	716590	1642400	629390	1013000
H0YKJ4;H0YK48;A0A494BZZ2;P09493-5;A0A494C0V8;H0YN06	H0YKJ4;H0YK48;A0A494BZZ2;P09493-5;A0A494C0V8	9;9;9;9;5;1	2;2;2;2;0;1	0;0;0;0;0;0	Tropomyosin alpha-1 chain	TPM1	28.597	248	248;248;251;245;155;49	0	4.5677	0.54012	0.8606	0.599	NaN	0.54012	NaN	NaN	0.8606	NaN	NaN	0.599	NaN	2874700	1896600	978030	0	0	0	2874700	1896600	978030	0	0	0
M0R210;P62249;M0R3H0;M0QX76;M0R1M5;Q6IPX4	M0R210;P62249;M0R3H0;M0QX76;M0R1M5;Q6IPX4	4;4;3;2;2;2	4;4;3;2;2;2	4;4;3;2;2;2	40S ribosomal protein S16	RPS16	14.419	129	129;146;100;50;85;152	0	4.1396	0.63065	0.86101	3.4275	0.30355	NaN	0.76901	0.76205	NaN	0.83692	15.042	NaN	4.5592	22904000	14350000	8553600	5707600	4154900	1552800	4558200	3179900	1378300	12638000	7015200	5622600
Q9NR45;Q5TBR0;Q5TBR1	Q9NR45	3;1;1	3;1;1	3;1;1	Sialic acid synthase	NANS	40.307	359	359;115;140	0	5.0786	0.5298	0.86156	33.41	0.23618	0.50907	NaN	0.48344	0.81814	NaN	23.91	3.0098	NaN	7584100	4878000	2706100	2460300	1882600	577740	5123800	2995400	2128400	0	0	0
H0YEN5;P15880;E9PQD7;I3L404;E9PM36;E9PMM9;E9PPT0	H0YEN5;P15880;E9PQD7	5;5;4;2;2;2;1	5;5;4;2;2;2;1	5;5;4;2;2;2;1	40S ribosomal protein S2	RPS2	21.154	195	195;293;235;155;209;218;197	0	12.141	0.54814	0.86163	11.842	0.3564	0.56224	0.8529	0.86163	0.98475	0.92885	108.16	3.2502	11.114	38012000	21862000	16150000	10860000	7116300	3743200	12034000	7214300	4819800	15118000	7531500	7586800
C9J9K3;A0A0C4DG17;P08865;F8WD59	C9J9K3;A0A0C4DG17;P08865;F8WD59	7;7;7;4	7;7;7;4	7;7;7;4	40S ribosomal protein SA	RPSA	29.404	263	263;300;295;116	0	45.706	0.61715	0.86192	10.292	0.34666	0.56092	0.86878	0.89985	0.96572	0.90271	21.223	30.028	17.3	114090000	71934000	42151000	31815000	23531000	8283900	40011000	24963000	15048000	42259000	23440000	18819000
B0YIW6;P48444-2;P48444	B0YIW6;P48444-2;P48444	4;4;4	4;4;4	4;4;4	Coatomer subunit delta	ARCN1	61.626	552	552;423;511	0	5.2492	0.67736	0.86204	18.974	0.33578	0.639	0.87941	0.77004	0.97111	0.9425	47.765	2.8807	33.828	12357000	7657300	4700100	3682700	2516800	1165900	4184000	2681000	1503000	4490800	2459500	2031300
P00441;H7BYH4	P00441;H7BYH4	5;4	5;4	5;4	Superoxide dismutase [Cu-Zn]	SOD1	15.936	154	154;135	0	154.22	0.50572	0.86209	15.664	0.36947	0.30917	1.3159	0.98357	0.53793	1.3616	34.803	11.436	15.431	117130000	74077000	43052000	24002000	17003000	6998700	50840000	39448000	11392000	42287000	17626000	24662000
P18669;P15259;Q8N0Y7	P18669	9;4;3	9;4;3	9;4;3	Phosphoglycerate mutase 1	PGAM1	28.804	254	254;253;254	0	323.31	0.42763	0.86322	66.102	0.30787	0.49388	1.0998	0.74421	0.86322	1.1206	24.401	66.025	29.363	391040000	234210000	156830000	76782000	58216000	18566000	123040000	83897000	39143000	191220000	92097000	99123000
I3L397;I3L504;P63241;F8WCJ1;C9J7B5;C9J4W5;Q9GZV4;Q6IS14;P63241-2	I3L397;I3L504;P63241;F8WCJ1;C9J7B5;C9J4W5;Q9GZV4;Q6IS14;P63241-2	5;5;5;4;4;4;4;4;4	5;5;5;4;4;4;4;4;4	5;5;5;4;4;4;4;4;4	Eukaryotic translation initiation factor 5A;Eukaryotic translation initiation factor 5A-1;Eukaryotic translation initiation factor 5A-2;Eukaryotic translation initiation factor 5A-1-like	EIF5A;EIF5A2;EIF5AL1	16.019	146	146;186;154;105;109;115;153;154;184	0	13.55	0.67252	0.86373	17.023	0.34608	0.67252	0.77309	0.82843	1.1334	0.77759	20.699	4.9589	34.934	76522000	46282000	30241000	17359000	13385000	3973300	20129000	12390000	7738600	39035000	20506000	18529000
P61158;B4DXW1;F8WDR7;F8WEW2;F8WE84;A0A0A0MTI9;H7C4J1;C9IZN3;Q9C0K3;Q9P1U1-2;Q9P1U1-3;Q9P1U1	P61158;B4DXW1	11;9;4;1;1;1;1;1;1;1;1;1	11;9;4;1;1;1;1;1;1;1;1;1	11;9;4;1;1;1;1;1;1;1;1;1	Actin-related protein 3	ACTR3	47.371	418	418;367;84;34;41;189;208;222;210;330;348;418	0	58.815	0.50195	0.86385	30.536	0.31097	0.54334	1.0122	0.77192	0.90109	1.0905	54.599	33.759	18.736	78957000	47363000	31594000	13758000	9852000	3906300	33440000	21392000	12048000	31758000	16120000	15639000
Q13642-1;Q13642-5;Q13642-4;Q5JXI8	Q13642-1;Q13642-5;Q13642-4;Q5JXI8	13;13;13;11	13;13;13;11	4;4;4;2	Four and a half LIM domains protein 1	FHL1	31.895	280	280;296;309;257	0	323.31	0.56406	0.86389	71.514	0.20658	0.23487	2.9494	0.54308	0.40426	3.079	31.852	14.178	37.03	461020000	294250000	166780000	35194000	27579000	7615000	280520000	226600000	53928000	145310000	40072000	105230000
B0QYK0;Q01844-6;Q01844-3;Q01844;Q01844-5;H7BY36;A0A0D9SFL3;C9JGE3;Q01844-4;Q01844-2	B0QYK0;Q01844-6;Q01844-3;Q01844;Q01844-5;H7BY36;A0A0D9SFL3;C9JGE3;Q01844-4;Q01844-2	2;2;2;2;2;1;1;1;1;1	2;2;2;2;2;1;1;1;1;1	2;2;2;2;2;1;1;1;1;1	RNA-binding protein EWS	EWSR1	64.929	618	618;600;655;656;661;308;584;620;354;583	0	86.589	0.66603	0.8645	30.843	NaN	NaN	0.76363	NaN	NaN	0.82423	NaN	NaN	37.588	10664000	6027800	4636700	1968000	1496400	471610	2245600	1346800	898720	6450900	3184500	3266400
O95202	O95202	2	2	2	LETM1 and EF-hand domain-containing protein 1, mitochondrial	LETM1	83.353	739	739	0	2.5937	0.48474	0.86464	52.731	0.48474	NaN	NaN	0.86464	NaN	NaN	52.731	NaN	NaN	1172900	838360	334590	1172900	838360	334590	0	0	0	0	0	0
Q9NZZ3	Q9NZZ3	1	1	1	Charged multivesicular body protein 5	CHMP5	24.57	219	219	0.0073875	1.3429	0.79368	0.86469	16.535	NaN	NaN	NaN	NaN	NaN	NaN	NaN	NaN	NaN	8405400	5328500	3076900	2296000	1741500	554510	2541100	1545100	995920	3568300	2041800	1526500
P00367;A0A804HJD7;P00367-3;P00367-2;P49448;A0A804HKE0;A0A804HJZ0;A0A804HIA0;A0A804HLC0;A0A804HHU3;A0A804HHS2	P00367;A0A804HJD7;P00367-3;P00367-2;P49448;A0A804HKE0	10;9;9;8;7;6;3;1;1;1;1	10;9;9;8;7;6;3;1;1;1;1	10;9;9;8;7;6;3;1;1;1;1	Glutamate dehydrogenase 1, mitochondrial;Glutamate dehydrogenase 2, mitochondrial	GLUD1;GLUD2	61.397	558	558;532;425;391;558;466;171;43;47;73;153	0	95.505	0.59903	0.86615	46.318	0.23962	0.85055	0.36187	0.47641	1.3939	0.38488	53.785	21.898	30.055	62278000	41940000	20338000	13915000	9740300	4174500	13328000	7306300	6022200	35035000	24894000	10141000
E9PHY5;O43491;E9PK52;O43491-4;E9PII3;O43491-2;O43491-3;A0A2R8Y5B3;E9PJP4;E9PQN0;E9PRG1;E9PIG0;E9PQD2;H0Y5B0;E9PMV8;Q6R5J7;E9PMG5	E9PHY5;O43491;E9PK52;O43491-4;E9PII3;O43491-2;O43491-3;A0A2R8Y5B3	17;17;15;15;13;13;13;12;5;5;5;5;5;5;4;4;1	17;17;15;15;13;13;13;12;5;5;5;5;5;5;4;4;1	15;15;13;13;11;11;11;10;5;5;5;5;5;5;4;4;1	Band 4.1-like protein 2	EPB41L2	104.36	935	935;1005;811;852;706;673;747;824;118;127;153;162;179;380;268;383;224	0	93.112	0.65403	0.86642	20.952	0.22782	0.53352	0.86125	0.53396	0.86016	0.92644	57.164	22.781	13.678	59086000	37123000	21963000	5770400	5154800	615620	26274000	16785000	9488600	27042000	15183000	11859000
Q9NYL9;H0YNU8;H0YKU1;H0YNJ8	Q9NYL9;H0YNU8;H0YKU1;H0YNJ8	4;2;2;2	4;2;2;2	4;2;2;2	Tropomodulin-3	TMOD3	39.594	352	352;33;187;213	0	28.923	0.77902	0.86689	17.087	0.33546	0.77902	0.82319	0.59878	1.1103	0.87931	37.959	43.125	12.378	9968600	5947800	4020800	1779300	1256100	523230	3283800	2115100	1168700	4905400	2576600	2328900
O00154-6;O00154-4;O00154-5;O00154-7;O00154;K7EKP8;O00154-2;O00154-3	O00154-6;O00154-4;O00154-5;O00154-7;O00154;K7EKP8;O00154-2;O00154-3	3;3;3;3;3;2;2;2	3;3;3;3;3;2;2;2	3;3;3;3;3;2;2;2	Cytosolic acyl coenzyme A thioester hydrolase	ACOT7	36.567	329	329;338;350;370;380;279;246;283	0.00078186	1.9253	0.82927	0.8675	70.951	NaN	NaN	0.98073	NaN	NaN	1.0361	NaN	NaN	28.85	6537000	3513600	3023400	783270	664790	118480	724670	562910	161760	5029100	2285900	2743100
P53007	P53007	1	1	1	Tricarboxylate transport protein, mitochondrial	SLC25A1	34.012	311	311	0	5.9958	0.6714	0.86755	47.557	NaN	NaN	NaN	NaN	NaN	NaN	NaN	NaN	NaN	2966800	1736000	1230800	621720	411840	209880	1138300	801480	336800	1206800	522680	684110
H3BRU6;F8VZX2;Q15366-7;Q15366-8;Q15366-4;Q15366-5;Q15366-6;Q15366-3;Q15366;Q15366-2;F8W0G4;F8VXH9;F8W1G6;F8VRH0;H3BND9;H3BSS4	H3BRU6;F8VZX2;Q15366-7;Q15366-8;Q15366-4;Q15366-5;Q15366-6;Q15366-3;Q15366;Q15366-2;F8W0G4;F8VXH9;F8W1G6	7;7;7;7;7;7;7;7;7;7;5;5;4;2;1;1	4;4;4;4;4;4;4;4;4;4;2;3;2;2;1;1	4;4;4;4;4;4;4;4;4;4;2;3;2;2;1;1	Poly(rC)-binding protein 2	PCBP2	31.6	301	301;321;318;322;331;335;361;362;365;366;158;160;202;310;112;184	0	8.2624	0.54271	0.86834	44.243	0.33791	0.54271	1.0632	0.69991	0.93372	1.1404	32.653	43.134	18.543	16154000	9284700	6869000	4932000	3394000	1538000	5189600	3114700	2075000	6032100	2776100	3256100
A0A1W2PNR9;Q9Y5U9	A0A1W2PNR9;Q9Y5U9	1;1	1;1	1;1	Immediate early response 3-interacting protein 1	IER3IP1	7.6079	69	69;82	0	3.5225	0.67466	0.86886	38.586	NaN	NaN	1.102	NaN	NaN	1.1708	NaN	NaN	36.167	3596400	1908200	1688300	542900	401240	141670	1039200	686540	352620	2014400	820390	1194000
Q99832-3;Q99832;Q99832-4;F8WAM2;Q99832-2	Q99832-3;Q99832;Q99832-4;F8WAM2;Q99832-2	6;6;4;3;3	6;6;4;3;3	6;6;4;3;3	T-complex protein 1 subunit eta	CCT7	54.804	499	499;543;456;98;339	0	38.86	0.70525	0.86893	8.2688	0.32237	1.087	0.81087	0.71479	1.7406	0.86893	22.141	97.295	16.816	21276000	12233000	9043500	4790500	3569800	1220600	4540200	2317300	2222900	11946000	6345700	5600000
E9PHN6;F6XZQ7;P28161-2;P28161;E9PLF1;E9PHN7;H3BQT3;E9PGV1;B9ZVX7;A0A0A0MR85;E7EWW9;Q03013-3;P09488-2;Q03013-2;Q03013;P09488	E9PHN6;F6XZQ7;P28161-2;P28161;E9PLF1;E9PHN7	3;3;3;3;2;2;1;1;1;1;1;1;1;1;1;1	3;3;3;3;2;2;1;1;1;1;1;1;1;1;1;1	3;3;3;3;2;2;1;1;1;1;1;1;1;1;1;1	Glutathione S-transferase Mu 2	GSTM2	22.876	193	193;220;191;218;147;181;85;87;149;218;237;157;181;195;218;218	0	6.8413	0.82739	0.86947	82.627	NaN	NaN	0.82739	NaN	NaN	0.86947	NaN	NaN	85.783	10214000	6479000	3734700	1384300	1092500	291790	363230	265620	97606	8466100	5120800	3345300
Q15404-2;Q15404	Q15404-2;Q15404	2;2	2;2	2;2	Ras suppressor protein 1	RSU1	25.545	224	224;277	0	2.5388	0.56688	0.86947	16.195	0.33705	0.64589	1.1162	0.65272	0.97497	1.1855	16.638	5.2875	15.319	10593000	6160000	4432800	3142700	2367000	775710	2077900	1220700	857180	5372300	2572300	2800000
P54136;P54136-2;E5RJM9;E5RH09	P54136;P54136-2	6;5;2;1	6;5;2;1	6;5;2;1	Arginine--tRNA ligase, cytoplasmic	RARS	75.378	660	660;588;129;113	0	12.678	0.6646	0.86984	28.95	0.27272	0.64027	0.71526	0.60121	1.0339	0.7632	91.278	5.945	49.68	13018000	8409800	4608000	3435200	2587400	847890	3849000	2331800	1517200	5733500	3490600	2242900
A0A6I8PRU6;A0A6I8PLD9;Q8N6L1;Q8N6L1-2	A0A6I8PRU6;A0A6I8PLD9;Q8N6L1;Q8N6L1-2	1;1;1;1	1;1;1;1	1;1;1;1	Keratinocyte-associated protein 2	KRTCAP2	11.998	112	112;114;136;162	0.0079734	1.3063	0.53326	0.86985	14.38	NaN	NaN	NaN	NaN	NaN	NaN	NaN	NaN	NaN	1444500	967020	477480	507760	371270	136480	936740	595750	341000	0	0	0
Q96A65-2;Q96A65	Q96A65-2;Q96A65	2;2	2;2	2;2	Exocyst complex component 4	EXOC4	53.856	473	473;974	0	2.5512	0.78583	0.86996	12.205	NaN	NaN	NaN	NaN	NaN	NaN	NaN	NaN	NaN	2243900	1306800	937060	389450	278150	111300	730120	508250	221870	1124300	520410	603890
P46977-2;P46977	P46977-2;P46977	3;3	3;3	3;3	Dolichyl-diphosphooligosaccharide--protein glycosyltransferase subunit STT3A	STT3A	69.588	613	613;705	0	3.4272	0.55133	0.87027	165.55	NaN	0.39227	1.0792	NaN	0.59036	1.1687	NaN	54.883	228.79	4870500	2694300	2176200	0	0	0	2347300	1464900	882420	2523200	1229300	1293800
A0A087WVV1;P49721	A0A087WVV1;P49721	1;1	1;1	1;1	Proteasome subunit beta type-2	PSMB2	9.557	84	84;201	0	3.1406	0.70268	0.87047	7.7975	NaN	NaN	NaN	NaN	NaN	NaN	NaN	NaN	NaN	1110500	746580	363970	0	0	0	432660	283520	149130	677890	463050	214840
Q5T6H7;Q9NQW7;Q9NQW7-3;Q9NQW7-2;Q9NQW7-4;Q5T6H3;Q5T6H2	Q5T6H7;Q9NQW7;Q9NQW7-3;Q9NQW7-2;Q9NQW7-4;Q5T6H3;Q5T6H2	4;4;4;3;3;2;2	4;4;4;3;3;2;2	4;4;4;3;3;2;2	Xaa-Pro aminopeptidase 1	XPNPEP1	62.138	552	552;623;666;599;642;233;303	0	14.213	0.73817	0.87067	19.332	0.33198	0.45389	1.0404	0.62147	0.66577	1.1007	18.005	27.758	20.896	9335100	5996900	3338200	1833900	1379800	454070	3124700	2183700	941030	4376500	2433400	1943100
R4GNH3;E9PM69;P17980;E9PKD5;E9PLG2;E9PN50;E9PMD8	R4GNH3;E9PM69;P17980;E9PKD5	6;5;5;4;2;2;2	6;5;5;4;2;2;2	6;5;5;4;2;2;2	26S protease regulatory subunit 6A	PSMC3	47.352	423	423;397;439;311;184;257;301	0	87.177	0.59933	0.87079	13.497	0.39778	0.59933	0.93346	0.75267	0.93637	0.98983	90.09	32.066	13.749	17596000	10180000	7416000	3832700	2567500	1265200	5978100	3613200	2364900	7784900	3999100	3785900
A0A6Q8PH81;H0Y9X3;O75340-3;O75340-2;O75340	A0A6Q8PH81;H0Y9X3;O75340-3;O75340-2;O75340	1;1;1;1;1	1;1;1;1;1	1;1;1;1;1	Programmed cell death protein 6	PDCD6	7.8217	73	73;104;69;189;191	0.002924	1.6415	0.72845	0.8708	41.394	NaN	NaN	NaN	NaN	NaN	NaN	NaN	NaN	NaN	1376700	768830	607850	0	0	0	495850	311640	184210	880830	457190	423640
Q9P0K7-4;Q9P0K7-3;Q9P0K7;Q9P0K7-2;D6RB25;D6RBW6;D6RB27;D6R9G4;D6RBY4;D6REL2;D6R9G6;D6RF74;D6RE17	Q9P0K7-4;Q9P0K7-3;Q9P0K7;Q9P0K7-2	8;8;8;8;1;1;1;1;1;1;1;1;1	8;8;8;8;1;1;1;1;1;1;1;1;1	8;8;8;8;1;1;1;1;1;1;1;1;1	Ankycorbin	RAI14	106.9	951	951;972;980;983;56;66;104;107;114;125;126;139;150	0	15.478	0.66398	0.87083	16.819	NaN	0.66486	NaN	NaN	1.0131	NaN	NaN	5.9993	NaN	14394000	9565000	4829400	4430000	3444500	985450	4792900	3105700	1687200	5171600	3014800	2156800
A8MUH2;P18859;P18859-2	A8MUH2;P18859;P18859-2	2;2;2	2;2;2	2;2;2	ATP synthase-coupling factor 6, mitochondrial	ATP5J	13.954	119	119;108;116	0	40.775	0.52936	0.87208	35.223	NaN	0.52936	NaN	NaN	0.87208	NaN	NaN	41.071	NaN	6756400	3921500	2834900	1305100	841340	463740	4218800	2637400	1581400	1232500	442730	789780
E2QRG8;Q00765	E2QRG8;Q00765	2;2	2;2	2;2	Receptor expression-enhancing protein;Receptor expression-enhancing protein 5	REEP5	18.121	165	165;189	0	3.6902	0.53073	0.87264	43.207	0.29345	0.53073	NaN	0.74111	0.89184	NaN	66.313	46.285	NaN	32439000	19017000	13423000	6673600	4727900	1945700	10424000	6633200	3790800	15342000	7655700	7686100
F8W9J4;A0A7P0T890;Q03001-9;Q03001;Q6P0N6;E7ETB9;A0A494C1D7;E9PHM6;F6QMI7;Q03001-3;Q03001-8;Q03001-14;H0YAT7;Q5T0V7;Q03001-13	F8W9J4;A0A7P0T890;Q03001-9;Q03001;Q6P0N6;E7ETB9;A0A494C1D7;E9PHM6;F6QMI7;Q03001-3;Q03001-8;Q03001-14	3;3;3;3;2;2;2;2;2;2;2;2;1;1;1	3;3;3;3;2;2;2;2;2;2;2;2;1;1;1	2;2;2;2;1;1;1;1;1;1;1;1;0;1;1	Dystonin	DST	847.96	7461	7461;7818;3060;7570;1143;1479;2383;5497;5537;2649;5171;5375;177;689;905	0.0099688	1.0971	0.44985	0.87328	32.479	0.24581	NaN	NaN	0.62988	NaN	NaN	30.516	NaN	NaN	13023000	8837400	4185500	4261900	3149900	1112000	3488400	2370200	1118200	5272500	3317300	1955200
Q6UVK1	Q6UVK1	3	3	3	Chondroitin sulfate proteoglycan 4	CSPG4	250.53	2322	2322	0	4.0937	0.82815	0.87397	12.569	NaN	NaN	0.82815	NaN	NaN	0.87397	NaN	NaN	12.569	8941300	5217900	3723300	0	0	0	0	0	0	8941300	5217900	3723300
O00505;H0Y4S9	O00505;H0Y4S9	2;1	2;1	2;1	Importin subunit alpha-4	KPNA3	57.81	521	521;91	0.0028209	1.5003	0.81135	0.87434	81.093	NaN	NaN	1.6078	NaN	NaN	1.7289	NaN	NaN	100.27	2014000	842800	1171200	0	0	0	907600	401380	506220	1106400	441420	664950
P40121;P40121-2;E7ENU9;B8ZZL6;H7C0X8	P40121;P40121-2;E7ENU9;B8ZZL6	8;7;6;4;2	8;7;6;4;2	8;7;6;4;2	Macrophage-capping protein	CAPG	38.498	348	348;333;253;218;103	0	15.401	0.5781	0.87591	61.429	0.94534	0.71574	0.4943	2.1597	1.7036	0.52558	39.446	36.54	65.445	35310000	20952000	14358000	7305600	3723500	3582100	6796800	3855100	2941700	21207000	13373000	7834300
P04066	P04066	2	2	2	Tissue alpha-L-fucosidase	FUCA1	53.688	466	466	0.00081037	2.1458	0.8348	0.87594	94.176	NaN	NaN	NaN	NaN	NaN	NaN	NaN	NaN	NaN	1648400	1049600	598770	270810	127020	143800	693960	567600	126370	683610	355010	328610
Q8N1G4	Q8N1G4	3	3	3	Leucine-rich repeat-containing protein 47	LRRC47	63.472	583	583	0	4.8323	0.71876	0.87737	24.804	NaN	NaN	NaN	NaN	NaN	NaN	NaN	NaN	NaN	2193000	1404000	789040	519540	391090	128450	827470	543500	283970	846040	469420	376620
P05387;H0YDD8	P05387	5;2	5;2	5;2	60S acidic ribosomal protein P2	RPLP2	11.665	115	115;92	0	91.124	0.57859	0.87788	24.089	0.34748	0.62646	0.84531	0.85494	1.0983	0.86084	18.823	30.702	20.523	177210000	112090000	65117000	65313000	48568000	16745000	63272000	37694000	25578000	48622000	25828000	22794000
J3KR44;Q96FW1;F5GYN4;F5H6Q1;F5GYJ8;F5H3F0;Q96FW1-2	J3KR44;Q96FW1;F5GYN4;F5H6Q1;F5GYJ8;F5H3F0	4;4;3;3;3;2;1	4;4;3;3;3;2;1	4;4;3;3;3;2;1	Ubiquitin thioesterase OTUB1	OTUB1	31.44	272	272;271;241;280;286;170;315	0	41.184	0.50893	0.87851	34.214	0.41674	0.50893	1.3463	0.82361	0.84482	1.4438	4.1021	10.554	41.299	9914100	6756100	3158000	2106600	1689800	416820	5624200	3971500	1652600	2183300	1094800	1088500
A0A087X054;Q9Y4L1;A0A494C039;E9PJ21;A0A087WWI4;K7EQK2;Q9Y4L1-2;J3QL06;J3KTF1	A0A087X054;Q9Y4L1;A0A494C039;E9PJ21;A0A087WWI4;K7EQK2;Q9Y4L1-2	6;6;5;4;4;4;4;2;2	6;6;5;4;4;4;4;2;2	6;6;5;4;4;4;4;2;2	Hypoxia up-regulated protein 1	HYOU1	104.78	937	937;999;1000;656;677;678;559;211;224	0	5.7015	0.49296	0.87927	44.529	0.55655	0.51253	2.1322	0.93238	0.73775	2.305	45.106	58.478	18.24	8566400	4841900	3724500	3875900	2555900	1320000	3488400	1952800	1535600	1202000	333150	868890
Q9UBI6	Q9UBI6	3	3	3	Guanine nucleotide-binding protein G(I)/G(S)/G(O) subunit gamma-12	GNG12	8.0061	72	72	0	95.02	0.48217	0.87951	24.402	0.285	0.3484	1.2165	0.75617	0.61845	1.2389	33.505	24.805	21.695	124850000	73512000	51335000	21251000	16129000	5122200	49536000	34955000	14581000	54060000	22428000	31632000
P20073-2;P20073	P20073-2;P20073	7;7	7;7	7;7	Annexin A7	ANXA7	50.315	466	466;488	0	54.401	0.58339	0.88026	25.244	0.24691	0.55149	0.65898	0.56863	0.92929	0.70922	70.473	21.071	21.492	33188000	21303000	11885000	6895300	5091500	1803800	17322000	11119000	6202500	8971600	5092500	3879000
Q12792;Q12792-3;F8VS81;Q12792-4;F8VRG3;F8W1Q9	Q12792;Q12792-3;F8VS81;Q12792-4	6;5;4;4;1;1	6;5;4;4;1;1	6;5;4;4;1;1	Twinfilin-1	TWF1	40.282	350	350;357;291;252;59;113	0	34.319	0.75162	0.8804	5.6196	0.3735	0.61528	0.83533	0.6755	1.0089	0.89577	8.8638	15.994	3.6997	15056000	9444300	5611300	2256100	1983700	272430	4663800	2850600	1813100	8135700	4609900	3525800
F8VZ29;F8VSD4;F8VV71;P61088	F8VZ29;F8VSD4;F8VV71;P61088	1;1;1;1	1;1;1;1	1;1;1;1	Ubiquitin-conjugating enzyme E2 N	UBE2N	9.7441	87	87;105;152;152	0	27.955	0.51171	0.88126	14.936	0.40944	0.51171	0.86362	0.90495	0.82158	0.91274	30.461	6.8781	1.9241	12849000	8134700	4714400	2778900	1954700	824150	4824900	3252000	1572900	5245300	2928000	2317300
Q15691	Q15691	4	4	4	Microtubule-associated protein RP/EB family member 1	MAPRE1	29.999	268	268	0	5.8713	0.4161	0.8824	26.402	NaN	NaN	NaN	NaN	NaN	NaN	NaN	NaN	NaN	7419700	4942100	2477700	2212200	1656200	556090	3415100	2137800	1277200	1792400	1148100	644370
P31150;G5E9U5	P31150	13;4	9;2	9;2	Rab GDP dissociation inhibitor alpha	GDI1	50.582	447	447;147	0	87.37	0.49989	0.88299	24.169	0.39363	0.49989	1.4671	0.88683	0.83212	1.5789	31.393	30.638	13.728	44875000	26265000	18610000	10323000	7354000	2968700	18786000	12209000	6576400	15767000	6702200	9064600
P62277;J3KMX5;E9PS50	P62277;J3KMX5	4;3;1	4;3;1	4;3;1	40S ribosomal protein S13	RPS13	17.222	151	151;148;116	0	25.397	0.60314	0.88367	20.963	0.33441	0.66525	0.85127	0.73075	1.1617	0.91661	16.48	18.152	6.9406	35363000	21393000	13970000	9138300	6422000	2716200	11198000	6721500	4476400	15027000	8249900	6777200
A0A590UJS2;Q5JWE9;A0A7I2V5R6;P63092-3;P63092-2;P63092;P63092-4;Q5JWF2-2;Q5JWF2;A0A804HIH4;A0A590UKA4;A0A590UJG5;A0A590UJF0;A0A590UKB4;A0A590UKA9;A0A590UKA1;A0A590UK28;A0A590UJJ0;A0A590UJB0;A0A590UJA5;S4R3V9;B0AZR9;A0A590UJY8;A0A590UJQ2;A0A590UJI6;A0A590UJ58;A0A590UJ22;A0A590UJR6;A0A590UJQ9;A0A590UJB7;A0A0A0MR13;A0A590UJY2;S4R3E3	A0A590UJS2;Q5JWE9;A0A7I2V5R6;P63092-3;P63092-2;P63092;P63092-4;Q5JWF2-2;Q5JWF2;A0A804HIH4;A0A590UKA4;A0A590UJG5;A0A590UJF0;A0A590UKB4;A0A590UKA9;A0A590UKA1;A0A590UK28;A0A590UJJ0;A0A590UJB0;A0A590UJA5;S4R3V9;B0AZR9;A0A590UJY8;A0A590UJQ2;A0A590UJI6;A0A590UJ58;A0A590UJ22;A0A590UJR6;A0A590UJQ9;A0A590UJB7;A0A0A0MR13;A0A590UJY2	5;5;5;5;5;5;5;5;5;4;4;4;4;4;4;4;4;4;4;4;4;4;4;4;4;4;4;4;4;4;4;3;2	4;4;4;4;4;4;4;4;4;4;4;4;4;4;4;4;4;4;4;4;4;4;4;4;4;4;4;4;4;4;4;3;2	4;4;4;4;4;4;4;4;4;4;4;4;4;4;4;4;4;4;4;4;4;4;4;4;4;4;4;4;4;4;4;3;2	Guanine nucleotide-binding protein G(s) subunit alpha isoforms short;Guanine nucleotide-binding protein G(s) subunit alpha isoforms XLas	GNAS	42.584	368	368;1022;1038;379;380;394;395;1023;1037;285;320;320;320;321;321;321;321;321;321;321;335;335;335;335;335;335;335;336;336;336;362;237;160	0	17.69	0.66831	0.88369	23.08	0.55913	0.41274	1.0821	1.2816	0.66415	1.1758	42.042	22.933	6.2391	21734000	12177000	9556800	3528600	2500000	1028700	10411000	6405800	4005000	7794700	3271600	4523100
E5RJR5;P63208;E5RGM3;E7ERH2;F8W8N3;P63208-2	E5RJR5;P63208;E5RGM3;E7ERH2;F8W8N3;P63208-2	2;2;1;1;1;1	2;2;1;1;1;1	2;2;1;1;1;1	S-phase kinase-associated protein 1	SKP1	18.72	163	163;163;102;142;158;160	0	8.3	0.67043	0.88393	29.921	0.29738	0.53687	1.2334	0.63676	0.88393	1.2929	32.764	29.921	13.457	17629000	10492000	7136800	2578500	1833000	745440	8034900	5212300	2822600	7015600	3446900	3568700
H0YFD6;P40939;A0A2R8Y4F5;A0A2R8YG21;A0A2R8Y688	H0YFD6;P40939;A0A2R8Y4F5;A0A2R8YG21	12;12;11;6;3	12;12;11;6;3	12;12;11;6;3	Trifunctional enzyme subunit alpha, mitochondrial;Long-chain enoyl-CoA hydratase;Long chain 3-hydroxyacyl-CoA dehydrogenase	HADHA	86.371	792	792;763;728;499;357	0	241.02	0.59958	0.88424	13.25	0.37038	0.57858	0.72819	0.83774	0.94662	0.78947	21.348	12.594	11.846	78967000	48339000	30628000	14257000	10069000	4188400	25635000	15815000	9820000	39075000	22455000	16620000
H0YMA1;H0YMZ1;H0YL69;P25789;H0YLC2;H0YKT8;H0YN18;H0YKS0;H0YLS6;H0YMI6;P25789-2;H0YMV3	H0YMA1;H0YMZ1;H0YL69;P25789;H0YLC2;H0YKT8;H0YN18;H0YKS0;H0YLS6;H0YMI6;P25789-2	4;4;4;4;3;3;3;2;2;2;2;1	4;4;4;4;3;3;3;2;2;2;2;1	4;4;4;4;3;3;3;2;2;2;2;1	Proteasome subunit alpha type;Proteasome subunit alpha type-4;Proteasome subunit beta type	PSMA4	23.27	209	209;220;236;261;174;181;230;122;125;183;190;86	0	4.1114	0.5754	0.88424	28.087	0.32644	0.5754	0.93235	0.88229	0.93301	0.99931	8.2489	19.336	65.694	12183000	7732200	4450600	4362400	3051900	1310500	4742000	2945500	1796500	3078300	1734800	1343500
E9PIQ8;E9PNJ4;H0YDB2;G0XQ39;Q13586-2;Q13586	E9PIQ8;E9PNJ4;H0YDB2;G0XQ39;Q13586-2;Q13586	1;1;1;1;1;1	1;1;1;1;1;1	1;1;1;1;1;1	Stromal interaction molecule 1	STIM1	16.212	139	139;512;716;791;540;685	0.0028229	1.5038	0.64415	0.88464	7.3837	NaN	NaN	NaN	NaN	NaN	NaN	NaN	NaN	NaN	657520	440610	216910	198220	127300	70919	459300	313310	146000	0	0	0
A0A7I2V4K5;X6R5C5;X6R8A1;P10619-2;P10619;A0A7I2V4D1;A0A7I2YQT8;A0A7I2V3B2;Q5JZH0	A0A7I2V4K5;X6R5C5;X6R8A1;P10619-2;P10619	3;3;3;3;3;1;1;1;1	3;3;3;3;3;1;1;1;1	3;3;3;3;3;1;1;1;1	Carboxypeptidase;Lysosomal protective protein;Lysosomal protective protein 32 kDa chain;Lysosomal protective protein 20 kDa chain	CTSA	50.925	450	450;481;498;463;480;363;371;389;392	0	16.416	0.7072	0.88489	13.936	0.79994	NaN	0.80438	2.1997	NaN	0.88489	23.34	NaN	32.143	22514000	14294000	8219300	5098000	3188500	1909400	7330200	5788000	1542100	10085000	5317600	4767800
P11766;H0YAG8;D6RFE4;D6RAY0;D6R9G2	P11766;H0YAG8	10;6;3;2;2	10;6;3;2;2	10;6;3;2;2	Alcohol dehydrogenase class-3	ADH5	39.724	374	374;262;115;56;95	0	205.46	0.67018	0.88489	33.402	0.2717	0.47014	0.90787	0.74137	0.82817	0.94413	60.942	46.134	17.232	100460000	60017000	40446000	13127000	9293000	3834100	41362000	26868000	14494000	45974000	23856000	22118000
Q76M96;Q76M96-2;H7C5K4	Q76M96;Q76M96-2;H7C5K4	7;7;4	7;7;4	7;7;4	Coiled-coil domain-containing protein 80	CCDC80	108.17	950	950;961;261	0	21.927	0.62322	0.88572	24.047	0.30102	0.5818	0.82934	0.57248	0.92126	0.88572	15.075	32.14	19.644	12793000	7965300	4827400	1884600	1376100	508460	8818300	5620700	3197600	2089900	968540	1121400
P04264;CON__P04264;CON__Q9R0H5;CON__Q6IFZ6	P04264;CON__P04264	26;25;1;1	26;25;1;1	17;16;0;0	Keratin, type II cytoskeletal 1	KRT1	66.038	644	644;644;524;572	0	323.31	0.42224	0.88632	27.185	0.39658	0.40089	1.6513	1.0449	0.70443	1.5964	16.046	22.7	35.176	830270000	490620000	339650000	160610000	110550000	50059000	370440000	264060000	106380000	299220000	116010000	183210000
Q12797;Q12797-10;E5RG56;Q12797-6;Q12797-11;Q12797-2;E5RHJ2;E5RG29;Q12797-7;Q12797-9;Q12797-5;Q12797-8;E5RHK2;G3XAN5;A0A087WUJ2;A0A087WW51;Q12797-4;Q12797-3	Q12797;Q12797-10	8;7;3;3;3;3;2;2;2;2;2;2;1;1;1;1;1;1	8;7;3;3;3;3;2;2;2;2;2;2;1;1;1;1;1;1	8;7;3;3;3;3;2;2;2;2;2;2;1;1;1;1;1;1	Aspartyl/asparaginyl beta-hydroxylase	ASPH	85.862	758	758;729;327;270;294;313;113;198;203;256;298;299;136;174;186;195;210;225	0	79.287	0.66557	0.88664	16.607	0.26676	0.5953	0.93637	0.52849	0.94512	0.9938	34.338	31.654	47.89	17187000	9115900	8071000	4226000	3137500	1088600	5083200	2978800	2104400	7877600	2999700	4878000
P61106;X6RFL8	P61106;X6RFL8	4;2	4;2	4;2	Ras-related protein Rab-14	RAB14	23.897	215	215;181	0	5.3194	0.54277	0.88816	1.3672	0.33107	0.59471	NaN	0.74886	0.95722	NaN	18.018	7.2169	NaN	13060000	7733500	5326800	2836000	1923400	912620	5259600	3106400	2153100	4964600	2703600	2261000
P13489;E9PMJ3;E9PLZ3;E9PIM9;E9PIK5;E9PMN0;H0YCR7;E9PMA9;E9PR82;E9PMI1	P13489;E9PMJ3;E9PLZ3;E9PIM9	14;7;7;7;6;5;5;4;2;2	14;7;7;7;6;5;5;4;2;2	14;7;7;7;6;5;5;4;2;2	Ribonuclease inhibitor	RNH1	49.973	461	461;189;194;199;181;168;285;77;35;40	0	323.31	0.63409	0.88834	28.554	0.31204	0.67069	0.78694	0.83162	1.139	0.85555	41.159	28.536	25.917	196280000	120920000	75364000	46973000	35457000	11516000	73179000	45564000	27615000	76131000	39898000	36233000
P30040;F8VY02;F8W1G0;P30040-2	P30040;F8VY02	4;2;1;1	4;2;1;1	4;2;1;1	Endoplasmic reticulum resident protein 29	ERP29	28.993	261	261;160;95;53	0	10.816	0.5456	0.88842	9.7042	0.38886	0.5456	0.76673	0.98077	0.91225	0.80152	13.629	16.644	25.193	42595000	26905000	15690000	8298900	5901700	2397200	15523000	10193000	5329500	18773000	10810000	7963200
O15145;C9JZD1	O15145;C9JZD1	2;1	2;1	1;0	Actin-related protein 2/3 complex subunit 3	ARPC3	20.546	178	178;99	0	84.769	0.49916	0.88903	30.033	0.33276	NaN	NaN	0.88405	NaN	NaN	37.33	NaN	NaN	12507000	7764500	4742600	6252100	4487300	1764900	2471100	1666800	804400	3783800	1610400	2173400
E9PJK1;E9PRJ8;H0YDL9;H0YDJ9;E9PIF1;A6NMH8;P60033;E9PM31;H0YEE2	E9PJK1;E9PRJ8;H0YDL9;H0YDJ9;E9PIF1;A6NMH8;P60033	3;3;3;3;3;3;3;1;1	3;3;3;3;3;3;3;1;1	3;3;3;3;3;3;3;1;1	Tetraspanin;CD81 antigen	CD81	17.963	165	165;209;221;225;242;274;236;92;148	0	77.042	0.62063	0.88922	6.1329	0.26848	0.52651	0.82813	0.5881	0.88063	0.89517	25.233	30.507	16.101	64962000	38229000	26733000	9255400	7566800	1688600	21193000	13078000	8115000	34513000	17584000	16929000
Q8NC51-4;Q8NC51-3	Q8NC51-4;Q8NC51-3	5;5	5;5	1;1	Plasminogen activator inhibitor 1 RNA-binding protein	SERBP1	42.426	387	387;393	0	22.754	0.70271	0.88924	9.6942	0.31706	0.70271	0.7392	0.77639	1.1208	0.79498	10.064	15.17	20.129	31220000	19669000	11551000	9577300	7220600	2356700	9401600	5490500	3911100	12241000	6958000	5282800
P68402-3;P68402-2;P68402-4;P68402	P68402-3;P68402-2;P68402-4;P68402	2;2;2;2	2;2;2;2	2;2;2;2	Platelet-activating factor acetylhydrolase IB subunit beta	PAFAH1B2	14.888	132	132;155;202;229	0	87.451	0.47787	0.88991	54.053	NaN	NaN	NaN	NaN	NaN	NaN	NaN	NaN	NaN	2205700	1301900	903740	446600	328200	118410	623020	439560	183470	1136000	534160	601860
F8VR77;Q9UQ80;H0YIN7;F8W0A3;Q9UQ80-2	F8VR77;Q9UQ80	3;3;1;1;1	3;3;1;1;1	2;2;1;1;1	Proliferation-associated protein 2G4	PA2G4	31.467	284	284;394;163;187;340	0	4.7641	0.56457	0.8902	15.697	NaN	0.53002	NaN	NaN	0.8412	NaN	NaN	17.835	NaN	8771500	5297600	3473900	0	0	0	5050800	3188800	1862000	3720700	2108900	1611900
P16989-2;P16989;P16989-3;A0A0D9SEI8	P16989-2;P16989;P16989-3;A0A0D9SEI8	5;5;4;3	3;3;2;1	3;3;2;1	Y-box-binding protein 3	YBX3	31.947	303	303;372;342;92	0	74.388	0.46769	0.89222	150.7	0.26688	NaN	NaN	0.54733	NaN	NaN	184.87	NaN	NaN	6968600	4701300	2267300	3225500	2779500	446040	2058300	1116400	941920	1684800	805410	879360
P54578-3;A6NJA2;P54578-2;P54578;J3QQT6;J3KS55	P54578-3;A6NJA2;P54578-2;P54578	7;6;6;6;1;1	7;6;6;6;1;1	7;6;6;6;1;1	Ubiquitin carboxyl-terminal hydrolase 14;Ubiquitin carboxyl-terminal hydrolase	USP14	54.769	483	483;448;459;494;20;28	0	193.43	0.83848	0.89251	18.932	0.40143	0.92758	0.87198	0.79483	1.648	0.929	20.302	74.27	15.466	17581000	9754400	7827100	4851000	3272000	1579000	4466500	2306300	2160200	8264000	4176100	4087800
Q5T5C7;P49591	Q5T5C7;P49591	6;6	6;6	6;6	Serine--tRNA ligase, cytoplasmic	SARS	61.312	536	536;514	0	30.631	0.49427	0.89285	37.86	0.36771	0.98924	NaN	0.78086	1.4927	NaN	33.671	30.051	NaN	17001000	10314000	6686900	9079000	6484700	2594300	5989600	2918800	3070800	1931900	910130	1021800
P17987;E7ERF2;F5GYL4;F5GZI8;F5H136;F5H676;F5H7Y1;F5H726;F5GZ03;F5H282;E7EQR6	P17987;E7ERF2;F5GYL4;F5GZI8	7;6;4;4;3;2;1;1;1;1;1	7;6;4;4;3;2;1;1;1;1;1	7;6;4;4;3;2;1;1;1;1;1	T-complex protein 1 subunit alpha	TCP1	60.343	556	556;433;65;100;136;111;59;91;221;332;401	0	5.8805	0.69373	0.89297	29.841	NaN	0.34306	0.74705	NaN	0.51108	0.7231	NaN	50.568	60.397	44416000	29197000	15219000	2928800	2230500	698290	5166200	3349500	1816700	36321000	23617000	12704000
P19623;K7EL89;K7ESL0	P19623;K7EL89;K7ESL0	2;1;1	2;1;1	2;1;1	Spermidine synthase	SRM	33.824	302	302;83;119	0.0015232	1.8045	0.60586	0.89334	16.745	0.31919	0.79567	NaN	0.66346	1.2312	NaN	5.3172	24.875	NaN	5496900	3403200	2093800	2346200	1653400	692800	2448600	1350400	1098200	702200	399380	302810
P67775-2;P67775;P62714;H0YBN9;E5RFI3;E5RHP4;E7ESG8;E5RHC1;H0YC23;H3BV22;H3BTA2;P60510	P67775-2;P67775;P62714;H0YBN9;E5RFI3;E5RHP4;E7ESG8;E5RHC1	4;4;4;2;2;2;2;2;1;1;1;1	4;4;4;2;2;2;2;2;1;1;1;1	4;4;4;2;2;2;2;2;1;1;1;1	Serine/threonine-protein phosphatase 2A catalytic subunit alpha isoform;Serine/threonine-protein phosphatase 2A catalytic subunit beta isoform;Serine/threonine-protein phosphatase	PPP2CA;PPP2CB	29.734	255	255;309;309;52;125;126;145;184;124;203;267;307	0	4.8159	0.82317	0.8936	26.279	NaN	0.461	0.82317	NaN	0.76044	0.8936	NaN	15.23	26.279	9923700	6233600	3690100	1537800	1266400	271410	3106000	2129400	976600	5279800	2837700	2442100
P84077;P61204;F5H423;P61204-2;F5H0C7;H0YGG7	P84077;P61204;F5H423;P61204-2;F5H0C7	6;6;5;4;3;1	6;6;5;4;3;1	3;3;2;2;1;1	ADP-ribosylation factor 1;ADP-ribosylation factor 3	ARF1;ARF3	20.697	181	181;181;210;144;102;62	0	20.114	0.53686	0.89363	16.554	0.30322	0.52846	1.1252	0.59548	0.90442	1.2115	36.866	16.626	36.646	72733000	42956000	29777000	17168000	12004000	5163600	24555000	15581000	8973700	31011000	15371000	15640000
A0A7P0MW50;A0A7I2V523;Q99460-2;Q99460;A0A7I2V479;A0A087WW66;A0A7I2YQI9;A0A7I2V4X0;A0A7I2V641;A0A7I2V2K8;A0A7I2YQY1;A0A7I2V262;A0A7I2V5C8;A0A7I2V4A5;A0A7I2V491;H7BZR6;C9J9M4;F8WCE3	A0A7P0MW50;A0A7I2V523;Q99460-2;Q99460;A0A7I2V479;A0A087WW66;A0A7I2YQI9;A0A7I2V4X0;A0A7I2V641;A0A7I2V2K8;A0A7I2YQY1;A0A7I2V262;A0A7I2V5C8;A0A7I2V4A5;A0A7I2V491	7;7;7;7;6;6;5;5;5;5;5;5;5;4;4;3;2;1	7;7;7;7;6;6;5;5;5;5;5;5;5;4;4;3;2;1	7;7;7;7;6;6;5;5;5;5;5;5;5;4;4;3;2;1	26S proteasome non-ATPase regulatory subunit 1	PSMD1	98.955	893	893;924;922;953;893;914;710;806;817;892;909;909;923;358;608;163;203;48	0	15.285	0.8	0.89366	15.741	NaN	0.57697	0.86519	NaN	0.89579	0.90751	NaN	33.502	14.371	10472000	6019800	4452000	1197600	815930	381680	5002000	3257500	1744500	4272100	1946400	2325800
P26639;P26639-2;D6RCA5;D6R9F8;D6RDJ6	P26639;P26639-2	5;5;1;1;1	5;5;1;1;1	5;5;1;1;1	Threonine--tRNA ligase, cytoplasmic	TARS	83.434	723	723;756;118;129;131	0	12.479	0.54164	0.89394	35.018	0.69877	0.50272	NaN	1.2348	0.77967	NaN	37.844	11.5	NaN	3848400	2414900	1433500	1235500	759180	476330	2612900	1655700	957170	0	0	0
P36578;H3BM89;H3BTP7;H3BU31	P36578;H3BM89	7;5;3;3	7;5;3;3	7;5;3;3	60S ribosomal protein L4	RPL4	47.697	427	427;333;170;171	0	12.764	0.51431	0.8945	16.258	0.31204	0.39761	1.071	0.83108	0.65299	1.1678	6.4006	37.528	15.287	68573000	43179000	25394000	16251000	12066000	4185100	18225000	12580000	5645300	34097000	18533000	15563000
Q15019;Q15019-3;Q15019-2;B5MCX3;C9J2Q4;C9IZU3;C9J938;C9JB25;H7C2Y0;C9IY94;C9JQJ4;H7C310;B5MD47;C9JZI2;A0A1B0GXJ2;C9JFT1;F8WB65;C9JT15;C9JSE7	Q15019;Q15019-3;Q15019-2;B5MCX3;C9J2Q4;C9IZU3;C9J938;C9JB25;H7C2Y0	10;10;10;9;7;5;5;5;5;4;4;4;3;3;2;2;2;1;1	10;10;10;9;7;5;5;5;5;4;4;4;3;3;2;2;2;1;1	10;10;10;9;7;5;5;5;5;4;4;4;3;3;2;2;2;1;1	Septin-2	2022-09-02	41.487	361	361;371;396;321;184;131;148;173;188;121;147;161;94;105;71;72;80;50;52	0	51.97	0.51607	0.8948	16.939	0.27753	0.56105	0.83821	0.63178	0.91455	0.90777	21.487	35.692	17.007	80974000	52113000	28861000	17281000	13190000	4091100	42275000	27995000	14281000	21418000	10929000	10489000
Q9ULV4;Q9ULV4-2;Q9ULV4-3;B4E3S0;H0YHL7;F8VV53;F8W1H8;F8VUX3;F8VSA4;F8VRE9;F8VTT6;F8VVB7	Q9ULV4;Q9ULV4-2;Q9ULV4-3;B4E3S0;H0YHL7	10;10;10;9;5;2;2;2;2;2;2;2	10;10;10;9;5;2;2;2;2;2;2;2	10;10;10;9;5;2;2;2;2;2;2;2	Coronin-1C;Coronin	CORO1C	53.248	474	474;480;527;369;165;125;151;159;162;163;169;181	0	54.839	0.51213	0.89482	16.732	0.29873	0.51179	1.1547	0.78512	0.89144	1.2424	12.048	13.679	10.153	110580000	62283000	48300000	15880000	11993000	3886600	39804000	25663000	14141000	54899000	24627000	30272000
Q7L1Q6-2;Q7L1Q6;Q7L1Q6-4;Q7L1Q6-3;C9IZ80;C9JFN4	Q7L1Q6-2;Q7L1Q6;Q7L1Q6-4;Q7L1Q6-3;C9IZ80	3;3;3;3;2;1	3;3;3;3;2;1	3;3;3;3;2;1	Basic leucine zipper and W2 domain-containing protein 1	BZW1	40.538	353	353;419;423;451;294;216	0	3.828	0.46154	0.89499	13.558	NaN	0.50784	NaN	NaN	0.80692	NaN	NaN	19.173	NaN	5311200	3665500	1645700	2296100	1686900	609210	3015000	1978500	1036500	0	0	0
O75915;F8WF90;C9JQU6;F8WF33	O75915;F8WF90;C9JQU6;F8WF33	4;2;2;2	4;2;2;2	4;2;2;2	PRA1 family protein 3	ARL6IP5	21.614	188	188;59;88;93	0	14.18	0.6804	0.89524	13.335	NaN	0.61035	0.76979	NaN	1.0208	0.81472	NaN	12.663	6.3325	29990000	17308000	12682000	2384100	1707000	677100	7791100	4857100	2934000	19815000	10744000	9070600
C9JX88;P35998;C9JLS9;P35998-2	C9JX88;P35998;C9JLS9	10;10;6;3	10;10;6;3	10;10;6;3	26S protease regulatory subunit 7	PSMC2	48.263	430	430;433;130;296	0	27.479	0.64598	0.89609	28.246	0.3895	0.63816	0.91051	0.76481	1.0172	0.93149	16.25	14.61	34.787	24551000	14695000	9856100	4567300	3356700	1210600	8856900	5136200	3720800	11126000	6201800	4924700
F6WLT2;Q5STU3;Q13838;Q13838-2;F6S4E6;A0A0A0MT12;F6TRA5;A0A0G2JHN7;F6U6E2;F6S2B7;A0A140T9X9;A0A140T996;F6R6M7;F6UJC5;A0A140TA18;K7EQN7;A0A140T9X3;A0A0G2JJZ9;O00148-3;O00148-2;O00148;K7ENP6;K7EL56;K7EIL8;K7EN69;A0A140T9L4;A0A140T973;F6SXL5;A0A140T9K1;H0YCC6;F6QYI9;A0A0G2JJL7;K7EPJ3	F6WLT2;Q5STU3;Q13838;Q13838-2;F6S4E6;A0A0A0MT12;F6TRA5;A0A0G2JHN7;F6U6E2;F6S2B7;A0A140T9X9;A0A140T996;F6R6M7;F6UJC5;A0A140TA18;K7EQN7;A0A140T9X3;A0A0G2JJZ9;O00148-3;O00148-2;O00148	4;4;4;4;3;3;3;2;2;2;2;2;2;2;2;2;2;2;2;2;2;1;1;1;1;1;1;1;1;1;1;1;1	4;4;4;4;3;3;3;2;2;2;2;2;2;2;2;2;2;2;2;2;2;1;1;1;1;1;1;1;1;1;1;1;1	4;4;4;4;3;3;3;2;2;2;2;2;2;2;2;2;2;2;2;2;2;1;1;1;1;1;1;1;1;1;1;1;1	Spliceosome RNA helicase DDX39B;ATP-dependent RNA helicase DDX39A	DDX39B;DDX39A	32.941	289	289;425;428;443;231;235;238;95;125;132;179;189;197;245;247;255;325;328;267;322;427;92;108;125;130;131;135;136;138;141;187;187;189	0	3.5021	0.57608	0.89612	16.174	0.42138	0.50388	NaN	0.79927	0.763	NaN	22.441	45.387	NaN	6933100	4899600	2033500	3561900	2728800	833040	2134400	1428300	706140	1236800	742530	494300
C9J0D1;A0A494C189;Q71UI9-2;Q71UI9;P0C0S5;C9J386;Q71UI9-3;Q71UI9-4	C9J0D1;A0A494C189;Q71UI9-2;Q71UI9;P0C0S5;C9J386;Q71UI9-3;Q71UI9-4	3;3;3;3;3;2;2;2	1;1;1;1;1;1;1;1	1;1;1;1;1;1;1;1	Histone H2A;Histone H2A.V;Histone H2A.Z	H2AFV;H2AFZ	13.163	122	122;127;114;128;128;76;90;102	0.006077	1.3588	0.51266	0.89627	87.407	NaN	NaN	NaN	NaN	NaN	NaN	NaN	NaN	NaN	16995000	10687000	6308300	4952000	2911600	2040400	7915800	4432000	3483800	4127200	3343000	784200
Q13885;Q9BVA1;K7ES63	Q13885;Q9BVA1	15;14;1	3;2;1	2;1;0	Tubulin beta-2A chain;Tubulin beta-2B chain	TUBB2A;TUBB2B	49.906	445	445;445;116	0	16.658	0.41398	0.8967	61.683	0.32797	0.62679	2.4508	0.75933	1.0248	2.5056	29.851	35.477	25.661	18905000	10202000	8703300	3248200	2353100	895090	7356700	4916200	2440600	8300200	2932500	5367700
F8VUA6;G3V203;H0YHA7;J3QQ67;Q07020-2;Q07020;F8VYV2;A0A075B7A0	F8VUA6;G3V203;H0YHA7;J3QQ67;Q07020-2;Q07020;F8VYV2;A0A075B7A0	2;2;2;2;2;2;1;1	2;2;2;2;2;2;1;1	2;2;2;2;2;2;1;1	60S ribosomal protein L18	RPL18	14.529	130	130;164;167;190;159;188;133;138	0	5.6152	0.56903	0.89762	8.2807	NaN	NaN	NaN	NaN	NaN	NaN	NaN	NaN	NaN	18460000	12432000	6028200	6070900	4613800	1457100	6548100	4325100	2223000	5841100	3493000	2348100
P00338;P00338-3;P00338-4;P00338-5;P00338-2;F5GYU2;F5GXY2;F5GXH2;F5H5J4;F5H6W8;F5GZQ4;F5H8H6;F5GXC7;F5GWW2;F5GXU1	P00338;P00338-3;P00338-4;P00338-5;P00338-2	20;20;15;14;14;9;9;8;4;4;3;2;2;2;2	20;20;15;14;14;9;9;8;4;4;3;2;2;2;2	17;17;14;11;11;7;7;6;4;4;3;2;2;2;2	L-lactate dehydrogenase A chain	LDHA	36.688	332	332;361;274;241;274;144;156;114;89;94;72;42;45;45;46	0	149.12	0.44523	0.89773	25.919	0.40214	0.37706	1.2213	0.93197	0.59129	1.1613	19.808	34.127	14.719	1942100000	1219500000	722620000	531850000	379960000	151890000	768230000	558480000	209750000	642000000	281020000	360980000
M0R3D6;M0R1A7;M0R117;Q02543;M0R0P7	M0R3D6;M0R1A7;M0R117;Q02543;M0R0P7	3;3;3;3;2	3;3;3;3;2	3;3;3;3;2	60S ribosomal protein L18a	RPL18A	16.714	141	141;147;154;176;137	0	14.834	0.59179	0.89817	21.325	0.31981	NaN	0.73191	0.79677	NaN	0.76764	16.941	NaN	30.414	14169000	8810800	5357800	4242900	3051700	1191200	3748100	2442800	1305300	6177700	3316300	2861300
Q9NVZ3-4;Q9NVZ3;Q9NVZ3-2;D6RAN6;F6SKB8;D6RB24;Q9NVZ3-3	Q9NVZ3-4;Q9NVZ3;Q9NVZ3-2;D6RAN6;F6SKB8;D6RB24;Q9NVZ3-3	2;2;2;1;1;1;1	2;2;2;1;1;1;1	2;2;2;1;1;1;1	Adaptin ear-binding coat-associated protein 2	NECAP2	25.267	237	237;263;273;101;194;202;172	0.0073727	1.3314	0.53674	0.89881	24.092	0.41894	NaN	NaN	0.76468	NaN	NaN	15.972	NaN	NaN	2950200	1809700	1140400	930910	652340	278570	1014900	697380	317560	1004300	460010	544320
F8VS11;P27144	F8VS11;P27144	1;1	1;1	1;1	Adenylate kinase 4, mitochondrial	AK4	19.78	171	171;223	0.001487	1.6967	0.66581	0.89921	42.259	NaN	NaN	NaN	NaN	NaN	NaN	NaN	NaN	NaN	5060100	2608800	2451300	0	0	0	2123200	1348400	774760	2936900	1260300	1676600
P62879;E7EP32;C9JIS1;C9JXA5;C9JZN1;P62879-2	P62879;E7EP32;C9JIS1;C9JXA5;C9JZN1;P62879-2	8;7;6;6;5;4	3;2;3;3;2;2	2;1;2;2;1;1	Guanine nucleotide-binding protein G(I)/G(S)/G(T) subunit beta-2	GNB2	37.331	340	340;296;232;251;152;240	0	122.91	0.66693	0.90071	40.356	0.20686	0.49076	0.90634	0.53454	0.8517	0.95256	26.876	37.517	6.0395	26238000	17599000	8639700	4587200	3696500	890750	12894000	9287600	3606800	8756700	4614500	4142200
P25705;P25705-2;P25705-3;K7EK77;K7ERX7;K7ENJ4;K7EQH4;K7EJP1;K7ESA0	P25705;P25705-2;P25705-3;K7EK77;K7ERX7	10;9;9;6;5;4;3;3;2	10;9;9;6;5;4;3;3;2	10;9;9;6;5;4;3;3;2	ATP synthase subunit alpha, mitochondrial	ATP5A1	59.75	553	553;503;531;207;205;199;111;144;77	0	86.013	0.49075	0.90083	15.263	0.35305	0.55826	0.69284	0.93007	0.97327	0.73771	26.646	19.186	3.5012	138780000	87838000	50939000	32121000	22456000	9664600	54662000	33670000	20992000	51993000	31711000	20282000
A0A087WY71;E9PFW3;Q96CW1-2;Q96CW1;C9JJ47;C9JGT8	A0A087WY71;E9PFW3;Q96CW1-2;Q96CW1;C9JJ47	6;6;6;6;4;1	6;6;6;6;4;1	4;4;4;4;3;0	AP-2 complex subunit mu	AP2M1	49.526	434	434;460;433;435;252;195	0	3.4832	0.55609	0.90084	9.627	0.32911	0.55609	1.7838	0.80343	0.90084	1.8958	3.8667	9.627	91.002	17552000	10713000	6838700	3565500	2501200	1064300	10685000	6694800	3990500	3300800	1516900	1783900
Q5VVC8;P62913-2;P62913	Q5VVC8;P62913-2;P62913	2;2;2	2;2;2	2;2;2	60S ribosomal protein L11	RPL11	19.024	167	167;177;178	0	4.3843	0.62515	0.90121	1.8213	0.34941	0.62515	0.8319	0.90121	1.0846	0.86895	1.8213	11.289	1.5177	40764000	25398000	15367000	12625000	9465000	3159900	13045000	7744000	5301400	15094000	8188600	6905300
B4DKY1;P49589-2;P49589;P49589-3	B4DKY1;P49589-2;P49589;P49589-3	3;3;3;3	3;3;3;3	3;3;3;3	Cysteine--tRNA ligase, cytoplasmic	CARS	84.277	739	739;726;748;831	0	15.684	0.50471	0.90157	26.028	NaN	0.58057	NaN	NaN	0.8294	NaN	NaN	36.173	NaN	1601000	1006900	594040	570810	369670	201150	1030200	637260	392890	0	0	0
P05386	P05386	2	2	2	60S acidic ribosomal protein P1	RPLP1	11.514	114	114	0	33.543	0.68853	0.90173	23.887	0.15134	0.48009	1.0545	0.31252	0.76159	1.127	46.962	17.078	3.8413	21057000	11746000	9310700	2301500	1982100	319370	4704600	3360300	1344300	14050000	6403400	7647000
H3BNX8;P20674	H3BNX8;P20674	1;1	1;1	1;1	Cytochrome c oxidase subunit 5A, mitochondrial	COX5A	17.235	153	153;150	0.00081103	2.1507	0.71792	0.9018	12.762	NaN	NaN	NaN	NaN	NaN	NaN	NaN	NaN	NaN	2656600	1591600	1065000	0	0	0	895940	507900	388040	1760600	1083700	676980
P84090;G3V279	P84090;G3V279	3;2	3;2	3;2	Enhancer of rudimentary homolog	ERH	12.259	104	104;71	0	58.428	0.42611	0.90197	38.528	NaN	0.38876	NaN	NaN	0.64938	NaN	NaN	46.466	NaN	9217600	6218300	2999200	3334200	2330900	1003300	5883400	3887400	1996000	0	0	0
A0A286YF22;A0A2C9F2M7;O43175;A0A286YFL2;A0A286YFA2;A0A286YFM8;A0A286YER3;A0A286YFC8;A0A286YFB2;A0A286YF78;A0A286YF34	A0A286YF22;A0A2C9F2M7;O43175;A0A286YFL2;A0A286YFA2;A0A286YFM8	6;6;6;4;4;3;2;2;2;2;1	6;6;6;4;4;3;2;2;2;2;1	6;6;6;4;4;3;2;2;2;2;1	D-3-phosphoglycerate dehydrogenase	PHGDH	55.938	526	526;532;533;429;445;239;97;123;165;276;72	0	13.951	0.57123	0.90207	10.055	0.19553	0.59528	0.85178	0.54806	1.0331	0.90207	9.1203	4.5593	0.63259	59748000	41557000	18192000	29029000	23181000	5848600	25451000	15542000	9909100	5268700	2834800	2433800
P46781;B5MCT8;C9JM19;F2Z3C0;A8MXK4	P46781;B5MCT8;C9JM19	4;2;2;1;1	4;2;2;1;1	4;2;2;1;1	40S ribosomal protein S9	RPS9	22.591	194	194;139;156;77;79	0	7.4218	0.42657	0.903	14.193	0.26723	0.57365	0.98973	0.76299	0.95792	1.052	20.398	22.268	14.187	64577000	46048000	18529000	37481000	29300000	8180900	20981000	13481000	7500100	6114500	3266700	2847800
O14979-3;O14979-2;A0A087WUK2;O14979;A0A087WU03;REV__Q8N0S2-3;REV__Q8N0S2-2;REV__A0A0B4J1R9;REV__Q8N0S2;REV__Q9ULL8-2;REV__Q9ULL8;Q9ULL8-2;Q9ULL8	O14979-3;O14979-2;A0A087WUK2;O14979	4;4;3;3;1;1;1;1;1;1;1;1;1	4;4;3;3;1;1;1;1;1;1;1;1;1	4;4;3;3;1;1;1;1;1;1;1;1;1	Heterogeneous nuclear ribonucleoprotein D-like	HNRNPDL	27.191	244	244;301;363;420;57;190;282;318;351;1377;1493;1377;1493	0	11.778	0.53666	0.90444	22.856	0.49631	0.53666	0.59321	0.99217	0.90444	0.65666	62.031	24.361	17.33	16533000	9566500	6966200	2223800	1324900	898920	5625200	3395000	2230200	8683700	4846600	3837100
O75781-2;O75781;A0A087WWY4;A0A087WTK8	O75781-2;O75781;A0A087WWY4;A0A087WTK8	5;5;3;3	5;5;3;3	5;5;3;3	Paralemmin-1	PALM	37.157	343	343;387;198;242	0	54.799	0.63215	0.90473	22.039	NaN	0.56327	0.91527	NaN	0.90429	0.94607	NaN	25.495	17.375	9287400	5901700	3385600	0	0	0	7302500	4934300	2368200	1984800	967460	1017400
Q9Y490	Q9Y490	71	71	64	Talin-1	TLN1	269.76	2541	2541	0	323.31	0.53674	0.90499	31.825	0.33143	0.52302	0.93549	0.85435	0.88005	1.0048	39.539	30.249	20.111	517990000	309880000	208110000	133800000	90596000	43209000	199230000	127130000	72097000	184950000	92146000	92807000
A0A7I2V448;B7Z5N7;H0YIZ7;A0A7I2V2U5;A0A7I2V590;A0A7I2V320;A0A7I2V4B8;A0A7I2V4U2;A0A7I2V3G4;A0A7I2V5I2;A0A7I2V3B4;Q8WVM8-2;Q8WVM8-3;Q8WVM8;G3V5E2;A0A7I2V5H5;A0A7I2V362;A0A7I2V4R0;A0A7I2V5Z4;A0A7I2YQR2;A0A7I2V3C9;G3V2M8;A0A7I2V321;A0A7I2YQQ1;A0A7I2V534	A0A7I2V448;B7Z5N7;H0YIZ7;A0A7I2V2U5;A0A7I2V590;A0A7I2V320;A0A7I2V4B8;A0A7I2V4U2;A0A7I2V3G4;A0A7I2V5I2;A0A7I2V3B4;Q8WVM8-2;Q8WVM8-3;Q8WVM8;G3V5E2;A0A7I2V5H5;A0A7I2V362;A0A7I2V4R0;A0A7I2V5Z4;A0A7I2YQR2;A0A7I2V3C9;G3V2M8	4;4;4;4;4;4;4;4;4;4;4;4;4;4;3;3;3;3;3;2;2;2;1;1;1	4;4;4;4;4;4;4;4;4;4;4;4;4;4;3;3;3;3;3;2;2;2;1;1;1	4;4;4;4;4;4;4;4;4;4;4;4;4;4;3;3;3;3;3;2;2;2;1;1;1	Sec1 family domain-containing protein 1	SCFD1	51.176	453	453;457;465;483;532;572;591;592;601;612;620;550;575;642;410;420;487;616;641;422;448;513;271;291;369	0	3.7059	0.60653	0.9051	24.908	NaN	NaN	0.69292	NaN	NaN	0.73213	NaN	NaN	35.21	3760800	2546400	1214400	612140	524610	87534	845920	436990	408930	2302700	1584800	717960
P55735;P55735-2;P55735-4;P55735-3;A8MXL6;E7ERC8	P55735;P55735-2;P55735-4;P55735-3;A8MXL6	6;5;5;5;3;1	6;5;5;5;3;1	6;5;5;5;3;1	Protein SEC13 homolog	SEC13	35.54	322	322;308;325;368;284;86	0	49.871	0.59995	0.90529	4.1224	0.41522	0.59503	1.0131	0.79998	0.91203	1.0932	32.394	14.698	0.33945	15295000	8633900	6661100	3161400	1428400	1733000	7541000	4692600	2848400	4592600	2512800	2079800
C9JYN0;Q16563-2;A0A0U1RQT9;Q16563	C9JYN0;Q16563-2;A0A0U1RQT9;Q16563	2;2;1;1	2;2;1;1	2;2;1;1	Synaptophysin-like protein 1	SYPL1	24.784	224	224;241;135;259	0.0027816	1.4555	0.46333	0.90563	13.099	0.36556	NaN	NaN	0.76615	NaN	NaN	36.752	NaN	NaN	6011800	3889400	2122300	2301000	1669300	631660	1768100	1159500	608620	1942700	1060600	882070
P10620;F5H7F6;F5H6X2;F5H760;P10620-2	P10620;F5H7F6;F5H6X2;F5H760;P10620-2	2;1;1;1;1	2;1;1;1;1	2;1;1;1;1	Microsomal glutathione S-transferase 1	MGST1	17.598	155	155;77;80;106;87	0	4.7732	0.54066	0.90571	54.571	NaN	0.54066	NaN	NaN	0.90571	NaN	NaN	18.038	NaN	37189000	22280000	14910000	10051000	8090200	1960400	13648000	8730700	4917500	13490000	5458700	8031600
Q14247;Q14247-3;Q14247-2;H0YEV2;H0YCD9	Q14247;Q14247-3;Q14247-2	12;11;11;3;3	12;11;11;3;3	12;11;11;3;3	Src substrate cortactin	CTTN	61.585	550	550;513;634;128;265	0	105.76	0.60494	0.90574	9.4787	0.27951	0.54939	0.82232	0.78963	0.93552	0.88208	20.378	22.106	18.424	85504000	51223000	34281000	18933000	13597000	5336000	38967000	23368000	15599000	27604000	14258000	13346000
P47756-2;B1AK87;B1AK88;P47756;B1AK85;A0A6I8PRV6;A0A6I8PIN8	P47756-2;B1AK87;B1AK88;P47756;B1AK85	8;7;7;7;5;3;1	8;7;7;7;5;3;1	8;7;7;7;5;3;1	F-actin-capping protein subunit beta	CAPZB	30.628	272	272;244;301;277;260;59;63	0	37.242	0.57987	0.90595	31.509	0.32052	0.57987	0.83782	0.8138	1.0061	0.88667	9.0661	34.534	12.536	98338000	61767000	36571000	27157000	20052000	7105600	34097000	22329000	11768000	37083000	19386000	17697000
Q04721	Q04721	2	2	2	Neurogenic locus notch homolog protein 2;Notch 2 extracellular truncation;Notch 2 intracellular domain	NOTCH2	265.4	2471	2471	0.00082169	2.207	0.74791	0.90649	44.523	NaN	0.50236	NaN	NaN	0.70879	NaN	NaN	34.793	NaN	2611400	2012400	599030	0	0	0	2059800	1626000	433890	551570	386430	165140
A6NC48;Q10588;H0Y984;Q10588-2;H0Y9Q9;H0Y8G4	A6NC48;Q10588;H0Y984;Q10588-2;H0Y9Q9;H0Y8G4	6;6;4;4;3;3	6;6;4;4;3;3	6;6;4;4;3;3	ADP-ribosyl cyclase/cyclic ADP-ribose hydrolase 2	BST1	37.482	333	333;318;186;260;97;155	0	49.247	0.68318	0.90719	70.122	NaN	0.2187	2.479	NaN	0.38234	2.7295	NaN	8.9788	17.122	31138000	19297000	11841000	802550	443340	359210	21113000	17007000	4106200	9222600	1846700	7375900
Q96QK1	Q96QK1	6	6	6	Vacuolar protein sorting-associated protein 35	VPS35	91.706	796	796	0	25.052	0.55744	0.9084	5.3893	0.37076	0.55744	0.86574	0.82017	0.93872	0.91345	33.669	5.3076	21.377	27784000	17301000	10483000	7321500	5271400	2050100	14149000	8631600	5517200	6313700	3398100	2915700
F5GZQ3;P55084-2;P55084;B5MD38;C9JEY0;C9JE81	F5GZQ3;P55084-2;P55084;B5MD38	4;4;4;3;1;1	4;4;4;3;1;1	4;4;4;3;1;1	Trifunctional enzyme subunit beta, mitochondrial;3-ketoacyl-CoA thiolase	HADHB	49.597	459	459;452;474;351;149;175	0	25.056	0.71425	0.91015	38.271	0.41745	0.6077	0.78678	0.99297	1.0514	0.8701	40.827	37.734	36.423	22991000	13830000	9160400	6879000	4781500	2097500	8663200	5131600	3531600	7448300	3917100	3531200
O94919	O94919	4	4	4	Endonuclease domain-containing 1 protein	ENDOD1	55.016	500	500	0	4.8604	0.68953	0.91031	51.12	NaN	0.68058	0.9516	NaN	1.1096	1.0055	NaN	43.247	42.056	7899400	4880700	3018700	1161000	981540	179450	4598600	2923300	1675400	2139800	975870	1163900
O75368	O75368	5	5	5	SH3 domain-binding glutamic acid-rich-like protein	SH3BGRL	12.774	114	114	0	16.323	0.52294	0.91036	20.776	0.34902	0.62865	0.80432	0.79478	0.98412	0.87289	21.317	58.046	13.08	31094000	18943000	12152000	6780300	4913100	1867100	11967000	7329900	4637000	12347000	6699600	5647500
A0A0U1RRM6;Q8N8S7-3;Q8N8S7-2;Q8N8S7;A0A075B6E5;A0A0U1RQP7;Q9UI08-4;Q9UI08	A0A0U1RRM6;Q8N8S7-3;Q8N8S7-2;Q8N8S7	9;9;9;9;3;2;1;1	9;9;9;9;3;2;1;1	9;9;9;9;3;2;1;1	Protein enabled homolog	ENAH	87.399	802	802;533;570;591;213;242;386;416	0	22.932	0.64084	0.91158	42.263	NaN	0.38078	4.6939	NaN	0.60689	5.0918	NaN	8.2035	90.379	28718000	14346000	14372000	1604600	991460	613130	14840000	10401000	4439700	12273000	2953600	9318900
P62195;P62195-2;J3QQM1;J3QSE0;J3QLH6;J3KRP2;J3QSA9;J3KTQ9;J3QRR3;J3QRW1	P62195;P62195-2;J3QQM1	8;7;4;2;2;2;2;1;1;1	8;7;4;2;2;2;2;1;1;1	7;6;3;2;1;1;1;1;0;0	26S protease regulatory subunit 8	PSMC5	45.626	406	406;398;263;169;215;241;257;52;127;143	0	11.263	0.57766	0.9119	14.593	0.37249	0.62503	0.9516	0.72808	1.0597	1.0016	11.809	51.327	10.855	20913000	12404000	8508500	5655400	3785900	1869500	10941000	6450900	4490300	4316400	2167600	2148700
A0A1B0GTP7;A0A1B0GUE3;A0A1B0GUW4;E7EMM4;A0A1B0GW68;A0A1B0GUA4;A0A1B0GTM3;A0A1B0GTZ5;A0A1B0GUH5;Q13510;Q13510-2;A0A1B0GV06;A0A1B0GUG1;Q13510-3;A0A1B0GVA3;A0A1B0GW66;A0A1B0GV95;A0A1B0GUJ3;A0A1B0GW48;A0A1B0GVJ1;A0A1B0GVE7;A0A1B0GU62;A0A1B0GU06;A0A1B0GUB3;A0A1B0GVG2	A0A1B0GTP7;A0A1B0GUE3;A0A1B0GUW4;E7EMM4;A0A1B0GW68;A0A1B0GUA4;A0A1B0GTM3;A0A1B0GTZ5;A0A1B0GUH5;Q13510;Q13510-2;A0A1B0GV06;A0A1B0GUG1;Q13510-3	4;4;4;4;4;4;4;4;4;4;4;3;3;3;1;1;1;1;1;1;1;1;1;1;1	4;4;4;4;4;4;4;4;4;4;4;3;3;3;1;1;1;1;1;1;1;1;1;1;1	4;4;4;4;4;4;4;4;4;4;4;3;3;3;1;1;1;1;1;1;1;1;1;1;1	Acid ceramidase;Acid ceramidase subunit alpha;Acid ceramidase subunit beta	ASAH1	32.573	288	288;330;368;370;374;375;376;386;393;395;411;200;366;389;110;125;140;151;173;175;184;185;191;246;341	0	7.0785	0.70933	0.91211	72.861	1.2834	0.49896	0.97355	2.8649	0.77997	1.0312	137.24	50.522	49.61	12903000	7026100	5877300	3365200	1013500	2351700	7592700	4841400	2751200	1945600	1171200	774430
F8WDD7;F8WCF6;A0A0A6YYG9;P59998;P59998-3;P59998-2;R4GN08;H7C0A3;P59998-4	F8WDD7;F8WCF6;A0A0A6YYG9;P59998;P59998-3;P59998-2;R4GN08;H7C0A3;P59998-4	2;2;2;2;2;2;1;1;1	2;2;2;2;2;2;1;1;1	2;2;2;2;2;2;1;1;1	Actin-related protein 2/3 complex subunit 4	ARPC4;ARPC4-TTLL3	13.057	113	113;181;625;168;187;625;77;167;78	0	3.4598	0.54717	0.91215	10.659	NaN	0.54717	NaN	NaN	0.92125	NaN	NaN	12.063	NaN	19572000	11843000	7729100	3833100	2748500	1084700	8833200	5489300	3343900	6905900	3605400	3300600
F8W651;F8VVA7;P61923;F8VXB1;F8VUC5;F8W156;F8VYZ4;P61923-5;P61923-4;F8VYK5;F8VXR1;P61923-2;P61923-3	F8W651;F8VVA7;P61923;F8VXB1;F8VUC5;F8W156;F8VYZ4;P61923-5;P61923-4	3;3;3;2;2;2;2;2;2;1;1;1;1	3;3;3;2;2;2;2;2;2;1;1;1;1	3;3;3;2;2;2;2;2;2;1;1;1;1	Coatomer subunit zeta-1	COPZ1	13.393	119	119;198;177;92;95;107;163;160;185;89;138;126;154	0	2.6868	0.53056	0.91329	2.4459	NaN	0.59908	1.0422	NaN	0.92923	1.1222	NaN	27.537	26.995	6886800	4283800	2603000	992630	662590	330040	3798400	2494400	1304000	2095700	1126800	968950
C9JJP5;A0A6Q8PFC4;A0A6Q8PH89;A0A6Q8PH27;A0A6Q8PG00;A0A6Q8PG04;A0A6Q8PGS4;A0A6Q8PF40;A0A6Q8PFY7;Q92734-4;Q92734-3;Q92734-2;Q92734;C9JUE0;C9JTY3;A0A6Q8PF51	C9JJP5;A0A6Q8PFC4;A0A6Q8PH89;A0A6Q8PH27;A0A6Q8PG00;A0A6Q8PG04;A0A6Q8PGS4;A0A6Q8PF40;A0A6Q8PFY7;Q92734-4;Q92734-3;Q92734-2;Q92734;C9JUE0	4;4;4;4;4;4;4;4;4;4;4;4;4;3;1;1	4;4;4;4;4;4;4;4;4;4;4;4;4;3;1;1	4;4;4;4;4;4;4;4;4;4;4;4;4;3;1;1	Protein TFG	TFG	20.365	181	181;249;264;270;274;278;285;369;412;280;284;396;400;157;141;194	0	5.3641	0.50663	0.91403	14.145	0.37656	0.50663	1.1235	0.91403	0.83689	1.1963	25.693	3.9281	17.369	24539000	14388000	10150000	4940700	3572000	1368700	9943100	6423000	3520100	9654900	4393400	5261600
Q96AC1;Q96AC1-3;A0A0U1RRM8;H0YJ34;Q96AC1-2;G3V3J0;H0YJB6	Q96AC1;Q96AC1-3;A0A0U1RRM8;H0YJ34;Q96AC1-2	12;12;10;10;10;3;2	12;12;10;10;10;3;2	12;12;10;10;10;3;2	Fermitin family homolog 2	FERMT2	77.86	680	680;687;545;640;633;155;133	0	50.031	0.5692	0.91425	21.475	0.33313	0.5692	1.0636	0.69552	0.91425	1.1583	25.371	8.1433	16.886	33882000	20556000	13326000	9666900	7331200	2335700	13927000	8500300	5427000	10288000	4724700	5563400
P04899;P04899-4;P04899-6;P04899-3;P04899-5;P04899-2;P63096;P08754;P63096-2;A0A3B3ITM0;P11488;P19087;A8MTJ3;A0A1W2PRE1;A0A1W2PQK2;A2A2R6;A0A087WTB6;Q5JWD1;A0A6Q8PGR1;A0A087WZE5;A0A3B3IUA8;H3BTM2;A0A1W2PP38;H0Y7E8;P38405-3;P38405;P38405-2	P04899;P04899-4;P04899-6;P04899-3;P04899-5;P04899-2	10;10;9;9;9;9;4;4;3;2;2;2;2;1;1;1;1;1;1;1;1;1;1;1;1;1;1	10;10;9;9;9;9;4;4;3;2;2;2;2;1;1;1;1;1;1;1;1;1;1;1;1;1;1	8;8;8;8;8;8;2;2;2;1;1;1;1;0;0;0;0;0;0;0;0;0;0;0;1;0;0	Guanine nucleotide-binding protein G(i) subunit alpha-2	GNAI2	40.45	355	355;366;303;318;339;339;354;354;302;168;350;354;354;54;61;72;84;87;110;123;148;195;196;730;174;381;458	0	27.18	0.54682	0.91429	25.505	0.27632	0.46623	1.2823	0.65157	0.81327	1.436	29.697	18.777	23.556	99445000	62411000	37035000	22575000	16836000	5739400	54026000	36191000	17835000	22843000	9383100	13460000
P38606-2;P38606;C9JA17;C9JVW8	P38606-2;P38606	6;6;1;1	6;6;1;1	6;6;1;1	V-type proton ATPase catalytic subunit A	ATP6V1A	64.735	584	584;617;184;221	0	22.685	0.68538	0.91432	31.166	0.66205	0.46739	0.85183	1.1868	0.74512	0.8503	58.631	21.476	22.285	30718000	15592000	15125000	3878800	2208900	1669900	2987800	1829900	1157900	23851000	11554000	12297000
P06756-3;P06756-2;P06756;H7BZG1	P06756-3;P06756-2;P06756	15;15;15;2	15;15;15;2	15;15;15;2	Integrin alpha-V;Integrin alpha-V heavy chain;Integrin alpha-V light chain	ITGAV	111.13	1002	1002;1012;1048;136	0	59.312	0.51286	0.91494	19.082	0.37986	0.43272	1.2635	0.82231	0.71323	1.3575	31.823	25.721	6.981	52644000	34766000	17878000	5784900	3803800	1981100	25598000	17500000	8098200	21261000	13463000	7798700
P78417;Q5TA02;P78417-2;P78417-3;Q5TA01	P78417;Q5TA02;P78417-2;P78417-3;Q5TA01	4;3;3;3;2	4;3;3;3;2	4;3;3;3;2	Glutathione S-transferase omega-1	GSTO1	27.566	241	241;200;208;213;180	0	7.9259	0.57733	0.91554	19.997	0.29646	0.6358	0.63868	0.81953	1.1126	0.67621	25.912	33.022	11.861	48401000	31711000	16690000	13893000	10539000	3353100	23613000	14853000	8760300	10896000	6319000	4576700
P22314-2;P22314;Q5JRR6;Q5JRR9;Q5JRS0;Q5JRS1;Q5JRS3;Q5JRS2	P22314-2;P22314	19;19;9;2;2;1;1;1	19;19;9;2;2;1;1;1	19;19;9;2;2;1;1;1	Ubiquitin-like modifier-activating enzyme 1	UBA1	113.8	1018	1018;1058;506;270;284;173;195;234	0	138.23	0.73909	0.9165	13.251	0.35923	0.74273	0.81075	0.80919	1.2557	0.85805	30.629	12.457	10.179	179360000	90690000	88673000	29975000	17593000	12382000	61431000	27443000	33989000	87957000	45654000	42303000
O95336;M0R261;M0R1L2;M0R0U3	O95336;M0R261;M0R1L2	6;4;3;2	6;4;3;2	6;4;3;2	6-phosphogluconolactonase	PGLS	27.547	258	258;216;147;179	0	5.8309	0.56082	0.91679	28.245	0.4148	0.50667	0.93606	0.7361	0.82975	0.998	30.646	24.131	11.153	24707000	14966000	9741200	5145900	3467700	1678200	11207000	7380200	3826300	8354600	4118000	4236600
A0A087WYR0;P09132	A0A087WYR0;P09132	1;1	1;1	1;1	Signal recognition particle 19 kDa protein	SRP19	13.654	120	120;144	0	10.896	0.66355	0.91711	44.931	NaN	NaN	NaN	NaN	NaN	NaN	NaN	NaN	NaN	1641500	1024700	616850	663520	519870	143650	0	0	0	977990	504790	473200
E7EQ29;P16278-2;P16278-3;P16278;C9J4G9	E7EQ29;P16278-2;P16278-3;P16278	5;5;5;5;1	5;5;5;5;1	5;5;5;5;1	Beta-galactosidase	GLB1	60.482	546	546;546;647;677;185	0	54.353	0.53118	0.91735	14.168	0.54581	0.30644	1.3962	1.0177	0.5026	1.4887	10.675	29.842	18.71	14700000	9933600	4766800	2091000	1348100	742930	9073900	7045900	2027900	3535500	1539500	1995900
Q9UBQ7;U3KQ56	Q9UBQ7;U3KQ56	3;2	3;2	3;2	Glyoxylate reductase/hydroxypyruvate reductase	GRHPR	35.668	328	328;358	0	21.388	0.74583	0.91758	48.831	NaN	0.48535	NaN	NaN	0.73997	NaN	NaN	61.742	NaN	8202300	5317300	2885000	325540	215020	110510	3889700	2840600	1049100	3987000	2261700	1725400
P00387-2;P00387;P00387-3;B1AHF3	P00387-2;P00387;P00387-3;B1AHF3	8;8;8;4	8;8;8;4	8;8;8;4	NADH-cytochrome b5 reductase 3;NADH-cytochrome b5 reductase 3 membrane-bound form;NADH-cytochrome b5 reductase 3 soluble form	CYB5R3	31.628	278	278;301;334;147	0	100.71	0.50387	0.91762	22.245	0.31417	0.49399	0.95915	0.74099	0.89315	1.0021	11.761	30.383	17.192	258510000	159440000	99068000	54675000	41367000	13308000	99722000	67154000	32568000	104110000	50918000	53192000
A0A7I2YQB2;A0A7I2V2G2;A0A7I2V2S7;P38646;A0A7I2V3F7;D6RCD7;H0Y8K0;H0Y8S0;A0A3B3ITI4	A0A7I2YQB2;A0A7I2V2G2;A0A7I2V2S7;P38646;A0A7I2V3F7;D6RCD7;H0Y8K0	16;16;16;16;15;15;8;2;1	16;16;16;16;15;15;8;2;1	16;16;16;16;15;15;8;2;1	Stress-70 protein, mitochondrial	HSPA9	63.186	577	577;610;648;679;603;665;458;102;180	0	101.79	0.75298	0.9183	38.569	0.272	0.74264	0.90339	0.63427	1.2424	0.95331	52.127	19.539	44.189	79926000	48671000	31255000	23807000	17295000	6512000	22577000	13066000	9511200	33541000	18309000	15232000
Q99961;M0QYE0;M0R0I3;Q99961-2;Q99961-3	Q99961;M0QYE0;M0R0I3;Q99961-2	3;2;2;2;1	3;2;2;2;1	3;2;2;2;1	Endophilin-A2	SH3GL1	41.489	368	368;128;139;320;304	0	7.2493	0.72578	0.91875	24.529	NaN	0.69766	0.82581	NaN	0.95391	0.89644	NaN	28.112	8.0475	10114000	6015700	4098100	437930	309120	128810	4799400	2994900	1804400	4876500	2711600	2164900
Q8J015;A0A7I2V5L3;A0A7I2V2L9;M0QYS1;Q6NVV1;P40429	Q8J015;A0A7I2V5L3;A0A7I2V2L9;M0QYS1;Q6NVV1;P40429	2;2;2;2;2;2	2;2;2;2;2;2	2;2;2;2;2;2	Putative 60S ribosomal protein L13a protein RPL13AP3;60S ribosomal protein L13a	RPL13a;RPL13A;RPL13AP3	16.731	142	142;188;198;210;102;203	0	3.0938	0.55575	0.92008	11.691	0.32387	0.55575	0.93049	0.8728	0.96315	0.97169	4.8757	5.2211	19.409	25712000	16390000	9322200	8862600	6644500	2218100	9052800	5796900	3255900	7796600	3948400	3848200
C9J0J7;G5E9Q6;P35080-2;C9J712;C9JQ45;P35080;C9J2N0	C9J0J7;G5E9Q6;P35080-2;C9J712;C9JQ45;P35080;C9J2N0	4;4;4;3;3;3;2	4;4;4;3;3;3;2	4;4;4;3;3;3;2	Profilin;Profilin-2	PFN2	9.8402	91	91;188;140;91;110;140;125	0	8.2666	0.7083	0.9205	24.989	0.26318	0.57267	0.8948	1.0202	0.90831	0.93286	49.33	46.525	18.582	21890000	12654000	9236600	6460700	4853200	1607400	6503600	3617600	2886000	8926100	4183000	4743200
E7EQG2;Q14240;Q14240-2;J3KSN7;J3KT04;J3KS93;E7EMV8;C9JUF0;J3QQP0;E9PBH4;F8WE11	E7EQG2;Q14240;Q14240-2	10;10;10;4;2;2;2;1;1;1;1	10;10;10;4;2;2;2;1;1;1;1	5;5;5;1;0;0;0;0;0;0;0	Eukaryotic initiation factor 4A-II;Eukaryotic initiation factor 4A-II, N-terminally processed	EIF4A2	41.29	362	362;407;408;109;85;85;98;57;95;96;97	0	31.363	0.63011	0.92087	11.928	0.33117	0.59579	0.79565	0.82687	0.94561	0.83384	15.761	19.593	25.179	78062000	47452000	30610000	17566000	12734000	4832000	28831000	17943000	10888000	31665000	16775000	14890000
D6R9B6;H0Y9Y4;D6RAT0;P61247;D6RG13;D6RB09;E9PFI5;D6RED7;D6RAS7;H0Y8L7	D6R9B6;H0Y9Y4;D6RAT0;P61247;D6RG13;D6RB09	6;6;6;6;5;4;2;1;1;1	6;6;6;6;5;4;2;1;1;1	6;6;6;6;5;4;2;1;1;1	40S ribosomal protein S3a	RPS3A	16.536	145	145;208;227;264;223;193;205;101;125;190	0	10.251	0.528	0.92111	23.528	0.31329	0.58556	0.97964	0.84072	1.0302	1.002	29.197	30.473	6.879	76705000	48597000	28108000	24292000	17733000	6559300	27316000	17617000	9699500	25096000	13247000	11849000
P50995-2;P50995;H0Y6E1;E5RIN3;P27216;P27216-2	P50995-2;P50995	9;9;2;1;1;1	9;9;2;1;1;1	9;9;2;1;1;1	Annexin A11	ANXA11	51.242	472	472;505;148;113;316;357	0	38.852	0.72157	0.92124	9.8323	0.31976	0.49611	0.99783	0.8347	0.84415	1.0772	11.602	14.403	36.692	88253000	29129000	59124000	9036900	6417600	2619300	53440000	14148000	39292000	25776000	8563300	17213000
B9A041;P40925-2;P40925;P40925-3;B8ZZ51;A0A5K1VW95;C9JRL4;C9JF79	B9A041;P40925-2;P40925;P40925-3;B8ZZ51;A0A5K1VW95	5;5;5;5;4;4;1;1	5;5;5;5;4;4;1;1	5;5;5;5;4;4;1;1	Malate dehydrogenase, cytoplasmic	MDH1	23.038	210	210;245;334;352;169;353;119;222	0	10.655	0.61359	0.92259	9.0671	0.35289	0.49471	0.89091	0.95874	0.83215	0.91187	5.898	40.672	29.318	60778000	36177000	24601000	16173000	11075000	5097600	23582000	14902000	8679800	21023000	10200000	10824000
A0A7I2YQN9;A0A7I2V5M7;Q13283;A0A7I2V2X7;A0A7I2V496;A0A7I2YQH0;A0A7I2V548;A0A7P0P2U7	A0A7I2YQN9;A0A7I2V5M7;Q13283;A0A7I2V2X7;A0A7I2V496;A0A7I2YQH0;A0A7I2V548;A0A7P0P2U7	2;2;2;1;1;1;1;1	2;2;2;1;1;1;1;1	2;2;2;1;1;1;1;1	Ras GTPase-activating protein-binding protein 1	G3BP1	47.987	426	426;476;466;49;61;134;158;367	0	2.4058	0.7049	0.92262	23.277	NaN	NaN	NaN	NaN	NaN	NaN	NaN	NaN	NaN	4234800	2233000	2001800	0	0	0	1635600	830840	804770	2599200	1402100	1197100
A0A087WT27;A0A494C1Q4;J3KN95;A0A494C1E2;A0A494C0G1;H0Y987;O95394;O95394-3;O95394-4;H0Y8I3;D6RIS6;A0A494C163;A0A494C099	A0A087WT27;A0A494C1Q4;J3KN95;A0A494C1E2;A0A494C0G1;H0Y987;O95394;O95394-3;O95394-4;H0Y8I3;D6RIS6;A0A494C163;A0A494C099	2;2;2;2;2;2;2;2;2;1;1;1;1	2;2;2;2;2;2;2;2;2;1;1;1;1	2;2;2;2;2;2;2;2;2;1;1;1;1	Phosphoacetylglucosamine mutase	PGM3	46.613	420	420;427;441;461;501;566;542;566;570;113;172;252;285	0	3.8998	0.63759	0.92275	56.774	NaN	NaN	NaN	NaN	NaN	NaN	NaN	NaN	NaN	2760500	1549700	1210800	582960	419520	163440	854900	433780	421120	1322600	696410	626210
P11216;H0Y4Z6;P11217-2;P11217	P11216	11;3;2;2	11;3;2;2	10;3;1;1	Glycogen phosphorylase, brain form	PYGB	96.695	843	843;245;754;842	0	32.616	0.68167	0.92312	18.841	0.24899	0.52746	0.96438	0.57674	0.87667	1.071	47.302	23.549	20.316	45193000	25560000	19632000	8429800	6077700	2352200	17439000	10423000	7015300	19324000	9059400	10265000
Q9BVC6	Q9BVC6	2	2	2	Transmembrane protein 109	TMEM109	26.21	243	243	0.0015302	1.8382	0.52698	0.92385	34.11	NaN	0.59816	NaN	NaN	1.0451	NaN	NaN	17.317	NaN	20481000	13672000	6808700	2416500	1813600	602970	12346000	8055800	4290300	5717800	3802400	1915400
P05204	P05204	1	1	1	Non-histone chromosomal protein HMG-17	HMGN2	9.3926	90	90	0	3.4081	0.40105	0.92433	28.185	0.29383	0.66849	NaN	0.7543	1.0405	NaN	28.748	31.876	NaN	12718000	8365300	4352400	4287000	3199500	1087600	8430700	5165800	3264800	0	0	0
P52907	P52907	9	9	9	F-actin-capping protein subunit alpha-1	CAPZA1	32.922	286	286	0	309.74	0.62329	0.92482	21.807	0.3152	0.49115	1.1	0.76431	0.79719	1.1412	20.406	21.458	19.773	90277000	49122000	41155000	13431000	9915400	3515700	29289000	17817000	11472000	47557000	21389000	26168000
Q9Y678;H0Y8X7;H0Y8G2	Q9Y678	7;2;1	7;2;1	7;2;1	Coatomer subunit gamma-1	COPG1	97.717	874	874;188;76	0	12.792	0.7631	0.92491	77.421	0.36569	0.64789	0.8626	0.65365	0.92601	0.90244	117.3	10.915	31.94	14337000	8332600	6004000	4516800	2635200	1881600	3338800	2211500	1127300	6481000	3485800	2995200
O43592;F5GYW6;F8WDU6	O43592	3;1;1	3;1;1	3;1;1	Exportin-T	XPOT	109.96	962	962;60;201	0	4.8488	0.68924	0.92535	2.7444	0.34991	0.61187	1.0112	0.63102	0.87523	1.0702	22.694	10.619	7.5691	3952100	2184900	1767100	1061000	758760	302230	1498700	829230	669450	1392400	596960	795450
Q96I99;H0Y852;E9PDQ8;Q96I99-2	Q96I99;H0Y852;E9PDQ8;Q96I99-2	2;1;1;1	2;1;1;1	2;1;1;1	Succinyl-CoA ligase [GDP-forming] subunit beta, mitochondrial	SUCLG2	46.51	432	432;190;379;440	0	3.4463	0.62244	0.92536	18.382	NaN	NaN	NaN	NaN	NaN	NaN	NaN	NaN	NaN	1770800	1210000	560760	756670	622520	134150	423180	281920	141270	590940	305600	285340
P50991;P50991-2	P50991;P50991-2	7;6	7;6	7;6	T-complex protein 1 subunit delta	CCT4	57.924	539	539;509	0	24.182	0.61246	0.92605	11.342	0.27567	0.62017	1.0118	0.57445	0.90599	1.0698	28.715	13.468	19.643	26948000	16867000	10081000	9091600	6841000	2250600	8348000	5084900	3263100	9508200	4940800	4567400
P05023-3;P05023-4;P05023;P05023-2;M0R116;B1AKY9;A0A2R8YEY8;A0A0A0MT26;P13637;P50993;P13637-2;P13637-3;H0Y7C1;Q13733;P20648;Q5TC02;Q5TC01;A0A669K9X0;M0QXF2;E9PRA5;P54707;P54707-2	P05023-3;P05023-4;P05023;P05023-2	14;14;14;11;6;6;6;6;6;6;6;6;5;2;2;1;1;1;1;1;1;1	14;14;14;11;6;6;6;6;6;6;6;6;5;2;2;1;1;1;1;1;1;1	14;14;14;11;6;6;6;6;6;6;6;6;5;2;2;1;1;1;1;1;1;1	Sodium/potassium-transporting ATPase subunit alpha-1	ATP1A1	109.55	992	992;1023;1023;681;983;1009;1010;1226;1013;1020;1024;1026;714;1029;1035;106;144;219;251;517;1039;1045	0	130.71	0.47648	0.92618	27.044	0.43538	0.36725	0.88682	1.0224	0.62109	0.98855	33.629	33.065	9.9306	66998000	41119000	25879000	7242800	4793500	2449300	28410000	19098000	9312000	31346000	17228000	14118000
P61970	P61970	1	1	1	Nuclear transport factor 2	NUTF2	14.478	127	127	0.0029007	1.6094	0.72052	0.92669	71.097	NaN	NaN	NaN	NaN	NaN	NaN	NaN	NaN	NaN	2674700	1605900	1068800	0	0	0	1116700	841410	275290	1558000	764520	793520
P55809	P55809	2	2	2	Succinyl-CoA:3-ketoacid coenzyme A transferase 1, mitochondrial	OXCT1	56.157	520	520	0	5.4966	0.72724	0.9268	41.153	NaN	NaN	NaN	NaN	NaN	NaN	NaN	NaN	NaN	3399200	2045700	1353500	0	0	0	1185500	743680	441770	2213700	1302000	911700
A0A494C1M4;Q3SY69;Q3SY69-3;Q3SY69-2;H0YHN9;C9IZ36;O75891-4;O75891;O75891-3	A0A494C1M4;Q3SY69;Q3SY69-3;Q3SY69-2	4;4;3;2;1;1;1;1;1	4;4;3;2;1;1;1;1;1	4;4;3;2;1;1;1;1;1	Mitochondrial 10-formyltetrahydrofolate dehydrogenase	ALDH1L2	102.85	932	932;923;516;203;92;177;505;902;912	0	12.267	0.50721	0.92726	23.613	0.50721	NaN	NaN	0.92726	NaN	NaN	23.613	NaN	NaN	1508100	1101200	406930	1508100	1101200	406930	0	0	0	0	0	0
Q6DD88;F5H6I7;F5GWF8	Q6DD88;F5H6I7	9;8;3	9;8;3	9;8;3	Atlastin-3	ATL3	60.541	541	541;523;169	0	45.274	0.77408	0.9277	19.421	0.33746	0.59778	0.9796	0.72405	0.95157	1.0485	18.269	34.561	23.482	28304000	15732000	12572000	5229100	3879500	1349500	10069000	5706500	4362800	13005000	6145800	6859500
A0A5F9ZHM4;P07195;A0A3B3IS95;A8MW50;C9J7H8;F5H793;F5H5G7;F5H155;A0A087WUM2;G3XAP5;F5H245;Q6ZMR3;P07864;Q9BYZ2	A0A5F9ZHM4;P07195;A0A3B3IS95;A8MW50;C9J7H8	10;10;8;7;6;3;1;1;1;1;1;1;1;1	7;7;5;4;4;3;0;0;0;0;0;0;0;0	7;7;5;4;4;3;0;0;0;0;0;0;0;0	L-lactate dehydrogenase B chain;L-lactate dehydrogenase	LDHB	37.294	341	341;334;281;232;136;102;183;225;233;241;318;332;332;381	0	224.53	0.53098	0.92813	12.309	0.33104	0.53098	0.88267	0.90517	0.92813	0.94196	13.132	7.0853	12.259	180330000	112910000	67421000	47535000	34386000	13149000	74308000	45886000	28421000	58488000	32637000	25851000
Q9Y394-2;Q9Y394;H0YJE4;H0YJ66	Q9Y394-2;Q9Y394;H0YJE4;H0YJ66	2;2;1;1	2;2;1;1	2;2;1;1	Dehydrogenase/reductase SDR family member 7	DHRS7	32.267	289	289;339;160;399	0	4.6132	0.6247	0.92944	25.525	NaN	NaN	NaN	NaN	NaN	NaN	NaN	NaN	NaN	4256000	2698400	1557600	758060	509420	248640	1343600	863150	480460	2154300	1325900	828470
P48047;H7C068;H7C086;A0A494C0K9;H7C0C1	P48047;H7C068	4;2;1;1;1	4;2;1;1;1	4;2;1;1;1	ATP synthase subunit O, mitochondrial	ATP5O	23.277	213	213;86;74;155;242	0	8.753	0.60052	0.92946	23.853	0.35409	0.5731	0.84064	0.79035	0.89498	0.89089	24.295	15.566	30.922	20472000	12941000	7530600	4568500	3368700	1199800	7765300	5143700	2621600	8138000	4428800	3709200
H0YH81;P06576;F8W079;F8W0P7;H0YI37	H0YH81;P06576;F8W079;F8W0P7	12;12;7;6;3	12;12;7;6;3	12;12;7;6;3	ATP synthase subunit beta;ATP synthase subunit beta, mitochondrial	ATP5B	38.138	362	362;529;284;270;133	0	26.616	0.58127	0.92958	28.59	0.31626	0.55512	0.84282	0.84927	0.97469	0.92134	55.525	17.211	22.041	137050000	86816000	50230000	41978000	29629000	12349000	45121000	32194000	12927000	49948000	24993000	24955000
A8MUA9;A8MU27;P61956-2;Q6EEV6;P61956;P55854;P55854-2	A8MUA9;A8MU27;P61956-2;Q6EEV6;P61956;P55854;P55854-2	1;1;1;1;1;1;1	1;1;1;1;1;1;1	1;1;1;1;1;1;1	Small ubiquitin-related modifier 2;Small ubiquitin-related modifier 4;Small ubiquitin-related modifier 3	SUMO3;SUMO2;SUMO4	15.317	135	135;147;71;95;95;103;141	0	2.5631	0.55721	0.93162	6.9096	NaN	NaN	NaN	NaN	NaN	NaN	NaN	NaN	NaN	12685000	7721100	4964100	5203100	3882000	1321100	0	0	0	7482000	3839000	3643000
Q92575	Q92575	1	1	1	UBX domain-containing protein 4	UBXN4	56.777	508	508	0.0060893	1.3616	0.56225	0.93211	8.5727	NaN	NaN	NaN	NaN	NaN	NaN	NaN	NaN	NaN	1593000	1042600	550340	698270	556090	142180	894710	486550	408160	0	0	0
F8VWS0;P05388-2;P05388;G3V210;F8VU65;F8VQY6;F8VPE8;F8VRK7;F8VS58;F8VW21;F8VZS0;Q8NHW5;F8VWV4;F8W1K8	F8VWS0;P05388-2;P05388;G3V210;F8VU65;F8VQY6;F8VPE8;F8VRK7;F8VS58;F8VW21;F8VZS0;Q8NHW5;F8VWV4	9;9;9;8;8;7;7;7;6;6;6;6;5;1	9;9;9;8;8;7;7;7;6;6;6;6;5;1	9;9;9;8;8;7;7;7;6;6;6;6;5;1	60S acidic ribosomal protein P0;60S acidic ribosomal protein P0-like	RPLP0;RPLP0P6	30.456	281	281;255;317;166;247;142;153;156;121;244;246;317;111;107	0	23.134	0.55719	0.93233	20.041	0.32968	0.55719	0.85755	0.88657	0.97685	0.93172	37.33	18.25	10.7	165280000	104740000	60541000	39972000	29685000	10287000	62498000	38213000	24285000	62810000	36841000	25969000
O60763;O60763-2	O60763;O60763-2	5;5	5;5	5;5	General vesicular transport factor p115	USO1	107.89	962	962;973	0	68.017	0.63799	0.93322	24.648	0.44804	NaN	1.1958	0.87831	NaN	1.2713	8.576	NaN	25.709	4072300	2432000	1640200	1564900	1192700	372150	501580	366260	135320	2005800	873060	1132800
P35555;H0YND0;A0A6I8PL22;F6U495;P35556;E9PHW4;D6RJI3;P35556-2	P35555	49;8;6;3;2;1;1;1	49;8;6;3;2;1;1;1	49;8;6;3;2;1;1;1	Fibrillin-1	FBN1	312.3	2871	2871;853;550;302;2912;341;1473;1473	0	323.31	0.59624	0.93336	53.336	0.070726	0.54016	2.9182	0.17323	0.84104	3.0324	89.146	15.348	46.138	187040000	141170000	45875000	122920000	109820000	13094000	42097000	25403000	16693000	22031000	5943000	16088000
Q04760-2;Q04760	Q04760-2;Q04760	4;4	4;4	4;4	Lactoylglutathione lyase	GLO1	19.043	169	169;184	0	4.4626	0.62957	0.93356	17.966	NaN	0.48573	1.0406	NaN	0.78949	1.1235	NaN	10.516	25.328	12081000	7083400	4997700	1222900	1005300	217650	5376300	3412100	1964200	5482000	2666000	2815900
P25786;P25786-2;F5GX11;B4DEV8	P25786;P25786-2;F5GX11	3;3;2;1	3;3;2;1	3;3;2;1	Proteasome subunit alpha type-1	PSMA1	29.555	263	263;269;238;164	0	5.8234	0.62404	0.93484	14.237	0.30212	0.70562	0.8831	0.65587	1.1262	0.93266	39.429	9.0805	17.451	28809000	16413000	12396000	4816100	3402900	1413200	6316500	3853500	2463000	17676000	9156100	8520000
P68363;P68363-2;C9JDS9	P68363;P68363-2	16;13;3	16;13;3	0;0;0	Tubulin alpha-1B chain	TUBA1B	50.151	451	451;335;156	0	323.31	0.58496	0.93516	24.164	0.31785	0.57366	1.0989	0.82757	0.9124	1.1282	23.848	31.825	17.165	2029000000	1199100000	829840000	399680000	309560000	90115000	674500000	436770000	237730000	954780000	452780000	502000000
P09622;E9PEX6;P09622-2;P09622-3;F8WDM5;A0A1W2PR83;F2Z2E3	P09622;E9PEX6;P09622-2;P09622-3	4;3;3;3;1;1;1	4;3;3;3;1;1;1	4;3;3;3;1;1;1	Dihydrolipoyl dehydrogenase, mitochondrial;Dihydrolipoyl dehydrogenase	DLD	54.177	509	509;486;410;461;114;114;115	0	3.6511	0.88697	0.93522	34.553	NaN	NaN	0.88697	NaN	NaN	0.93522	NaN	NaN	34.553	8546300	4740900	3805400	0	0	0	0	0	0	8546300	4740900	3805400
P62899;H7C2W9;C9JU56;B7Z4E3;B7Z4C8;P62899-3;P62899-2;B8ZZK4	P62899;H7C2W9;C9JU56;B7Z4E3;B7Z4C8;P62899-3;P62899-2	5;4;4;4;4;4;4;2	5;4;4;4;4;4;4;2	5;4;4;4;4;4;4;2	60S ribosomal protein L31	RPL31	14.463	125	125;108;115;120;130;121;128;79	0	4.737	0.59242	0.93669	111.54	0.30153	0.18928	0.94467	0.8009	0.3085	1.003	85.024	166.53	45.313	30705000	19005000	11700000	11776000	8667700	3108700	4993100	3545600	1447500	13935000	6791700	7143700
Q06830;A0A0A0MSI0;A0A0A0MRQ5	Q06830;A0A0A0MSI0	11;10;5	11;10;5	8;7;2	Peroxiredoxin-1	PRDX1	22.11	199	199;171;97	0	23.734	0.5297	0.9373	28.147	0.36012	0.58648	0.6606	0.89458	1.0929	0.63419	29.866	49.782	15.854	534110000	345980000	188130000	117170000	84168000	32998000	229840000	147230000	82612000	187100000	114590000	72518000
G3V2H0;Q96HE7;Q5TAE8;Q86YB8	G3V2H0;Q96HE7;Q5TAE8;Q86YB8	2;2;1;1	2;2;1;1	2;2;1;1	ERO1-like protein alpha;ERO1-like protein beta	ERO1L;ERO1LB	8.8244	75	75;468;173;467	0.0093691	1.1106	0.70633	0.93733	46.594	NaN	NaN	1.11	NaN	NaN	1.2173	NaN	NaN	9.6305	8293100	4865600	3427500	1670200	1314600	355530	2128500	1352700	775810	4494500	2198300	2296200
P09211;A8MX94;A0A087X2E9;A0A087X243	P09211;A8MX94	10;7;4;1	10;7;4;1	10;7;4;1	Glutathione S-transferase P	GSTP1	23.356	210	210;174;79;69	0	212.66	0.6246	0.93761	10.284	0.35664	0.55097	1.0452	0.90309	0.87985	1.1016	7.9779	32.834	17.68	240150000	140610000	99532000	46304000	33246000	13057000	78178000	49868000	28310000	115670000	57500000	58165000
P49207	P49207	2	2	2	60S ribosomal protein L34	RPL34	13.293	117	117	0.0079523	1.303	0.73922	0.93875	26.195	NaN	NaN	0.89767	NaN	NaN	0.99379	NaN	NaN	18.137	5623400	3388600	2234700	935070	731020	204050	789690	512590	277090	3898600	2145000	1753600
P12111-4;P12111-2;P12111;P12111-3;P12111-5;C9JNG9;A0A804HKQ0;A0A804HKC7;E7ENL6	P12111-4;P12111-2;P12111	11;11;11;5;5;2;1;1;1	11;11;11;5;5;2;1;1;1	11;11;11;5;5;2;1;1;1	Collagen alpha-3(VI) chain	COL6A3	278.2	2570	2570;2971;3177;1036;1237;708;138;227;638	0	16.418	0.63228	0.93954	29.715	0.55337	NaN	0.63228	1.0534	NaN	0.64703	16.172	NaN	30.532	11439000	7565800	3873600	1696100	1108400	587770	565140	250190	314950	9178100	6207200	2970900
P08238;Q58FF7	P08238	24;9	23;9	11;2	Heat shock protein HSP 90-beta	HSP90AB1	83.263	724	724;597	0	323.31	0.6021	0.9396	61.132	0.3465	0.61291	0.91223	0.87779	1.1078	0.92141	18.663	75.01	28.709	775830000	466030000	309810000	191950000	140670000	51279000	214010000	130740000	83277000	369870000	194620000	175250000
A0A0U1RQF0;P49327	A0A0U1RQF0;P49327	4;4	4;4	4;4	Fatty acid synthase;[Acyl-carrier-protein] S-acetyltransferase;[Acyl-carrier-protein] S-malonyltransferase;3-oxoacyl-[acyl-carrier-protein] synthase;3-oxoacyl-[acyl-carrier-protein] reductase;3-hydroxyacyl-[acyl-carrier-protein] dehydratase;Enoyl-[acyl-carrier-protein] reductase;Oleoyl-[acyl-carrier-protein] hydrolase	FASN	273.2	2509	2509;2511	0	4.8044	0.75626	0.94187	8.7783	NaN	NaN	NaN	NaN	NaN	NaN	NaN	NaN	NaN	844160	400290	443880	0	0	0	383440	181240	202200	460720	219050	241670
Q99584	Q99584	4	4	4	Protein S100-A13	S100A13	11.471	98	98	0	21.935	0.48565	0.94204	37.061	0.36142	0.3998	0.99952	0.9144	0.70164	1.0522	6.8263	27.279	13.425	53938000	33824000	20114000	8560200	6051000	2509300	27320000	19193000	8127200	18057000	8580000	9477200
A0A2R8Y811;P62263;E5RH77	A0A2R8Y811;P62263;E5RH77	4;4;3	4;4;3	4;4;3	40S ribosomal protein S14	RPS14	16.159	150	150;151;134	0	38.292	0.59507	0.94268	30.325	0.30908	0.51419	0.98637	0.76391	0.75894	1.0493	14.671	22.523	12.923	45830000	28498000	17331000	11583000	8777600	2805800	18010000	11117000	6892200	16237000	8603500	7633100
Q68DG0;Q9UBY9;Q9UBY9-2;Q8N241;D3YTC6;C9J5A3;Q9UBY9-3	Q68DG0;Q9UBY9;Q9UBY9-2;Q8N241;D3YTC6	6;6;6;5;4;2;2	6;6;6;5;4;2;2	6;6;6;5;4;2;2	Heat shock protein beta-7	DKFZp779D0968;HSPB7	19.017	174	174;170;175;245;165;124;68	0	57.766	0.49508	0.94356	20.977	0.47456	0.44417	2.1718	1.0455	0.77376	2.3029	19.613	36.831	25.68	76878000	38584000	38294000	8698700	5579100	3119500	28839000	20418000	8421400	39340000	12587000	26753000
Q9NR12;Q9NR12-2;D6RF83;D6RH06;Q9NR12-3;Q9NR12-5;Q9NR12-6;Q9NR12-4;D6RAN1;H7BYK4	Q9NR12;Q9NR12-2	8;7;2;2;2;2;2;2;1;1	8;7;2;2;2;2;2;2;1;1	8;7;2;2;2;2;2;2;1;1	PDZ and LIM domain protein 7	PDLIM7	49.844	457	457;423;173;287;153;191;222;287;90;195	0	22.573	0.5824	0.94376	54.736	0.50656	0.4953	2.7226	2.1168	0.7976	2.856	79.513	33.707	13.982	35094000	17732000	17362000	7090700	4858100	2232600	18251000	10444000	7807300	9751900	2430100	7321700
B4DUR8;P49368-2;P49368;E9PQ35;E9PM09;Q5SZX9;Q5SZW8;E9PRC8;Q5SZX6	B4DUR8;P49368-2;P49368	6;6;6;1;1;1;1;1;1	6;6;6;1;1;1;1;1;1	6;6;6;1;1;1;1;1;1	T-complex protein 1 subunit gamma	CCT3	55.674	500	500;507;545;144;154;161;188;234;276	0	13.245	0.65787	0.94408	22.721	0.35014	0.5693	1.0417	0.97169	0.94408	1.1197	38.898	51.721	4.9389	17595000	10033000	7562100	4149900	2972500	1177400	4863800	2720600	2143200	8581000	4339500	4241500
P31948-3;P31948;P31948-2;H0YGI8;F5GXD8;F5H783	P31948-3;P31948;P31948-2;H0YGI8	6;6;6;3;2;2	6;6;6;3;2;2	6;6;6;3;2;2	Stress-induced-phosphoprotein 1	STIP1	59.777	519	519;543;590;137;138;236	0	35.212	0.61609	0.94469	6.104	0.27082	0.57451	1.1145	0.59234	0.8674	1.1645	56.778	7.9339	12.063	21068000	12797000	8270900	4141500	3182000	959500	8305300	5249900	3055400	8621300	4365300	4256000
E7EUC7;Q16851;C9JQU9;C9J6Q0	E7EUC7;Q16851;C9JQU9	8;8;5;2	8;8;5;2	1;1;0;1	UTP--glucose-1-phosphate uridylyltransferase	UGP2	57.805	517	517;508;175;60	0	47.247	0.89299	0.9447	27.136	NaN	0.40266	0.96159	NaN	0.64504	1.007	NaN	47.147	15.701	26199000	15165000	11034000	1497200	1033400	463830	8273200	5781400	2491800	16429000	8350500	8078300
F2Z388;P42766	F2Z388;P42766	1;1	1;1	1;1	60S ribosomal protein L35	RPL35	10.645	96	96;123	0.0041096	1.3966	0.87221	0.94567	26.54	NaN	NaN	NaN	NaN	NaN	NaN	NaN	NaN	NaN	14980000	9676100	5304100	3851300	3049300	802030	4849700	3212500	1637200	6279200	3414300	2864900
P12236	P12236	9	9	2	ADP/ATP translocase 3;ADP/ATP translocase 3, N-terminally processed	SLC25A6	32.866	298	298	0	12.058	0.75399	0.94659	26.642	0.26132	0.94184	0.86905	0.69763	1.5437	0.94556	47.37	18.352	31.129	81611000	45492000	36119000	22469000	16321000	6148700	21036000	9907600	11129000	38105000	19263000	18842000
A0A3B3IUA2;A0A3B3ISK4;A0A3B3IRU2;B1AHD1;P55769	A0A3B3IUA2;A0A3B3ISK4;A0A3B3IRU2;B1AHD1;P55769	2;1;1;1;1	2;1;1;1;1	2;1;1;1;1	NHP2-like protein 1;NHP2-like protein 1, N-terminally processed	NHP2L1	30.162	272	272;67;73;132;128	0	3.5966	0.48914	0.94822	21.426	NaN	0.47495	NaN	NaN	0.7768	NaN	NaN	24.388	NaN	61026000	37929000	23098000	13523000	9576800	3946100	22287000	16128000	6159000	25217000	12224000	12992000
P62877	P62877	1	1	1	E3 ubiquitin-protein ligase RBX1;E3 ubiquitin-protein ligase RBX1, N-terminally processed	RBX1	12.274	108	108	0	21.047	0.74753	0.94826	6.026	NaN	NaN	NaN	NaN	NaN	NaN	NaN	NaN	NaN	6660100	3826800	2833300	1424600	985770	438850	2440400	1521800	918570	2795100	1319200	1475800
A0A7P0S5H5;P60866;P60866-2;E5RIP1;E5RJX2;G3XAN0	A0A7P0S5H5;P60866;P60866-2;E5RIP1;E5RJX2;G3XAN0	2;2;2;1;1;1	2;2;2;1;1;1	2;2;2;1;1;1	40S ribosomal protein S20	RPS20	15.312	136	136;119;142;46;61;64	0	6.6528	0.67848	0.94856	15.211	NaN	0.54581	0.84706	NaN	0.94958	0.91563	NaN	0.78143	19.025	42494000	25571000	16923000	5826600	3999300	1827200	9212800	6006300	3206500	27455000	15566000	11889000
P62851	P62851	3	3	3	40S ribosomal protein S25	RPS25	13.742	125	125	0	2.559	0.71046	0.94903	12.476	0.27725	0.73614	0.85308	0.74717	1.2037	0.94903	10.147	33.502	12.648	22946000	13536000	9409500	5716100	4047300	1668800	5953800	3511300	2442500	11276000	5977900	5298200
O00232-2;O00232	O00232-2;O00232	3;3	3;3	3;3	26S proteasome non-ATPase regulatory subunit 12	PSMD12	50.578	436	436;456	0	30.921	0.54245	0.9492	73.879	NaN	0.38792	NaN	NaN	0.60447	NaN	NaN	97.768	NaN	2880300	1882300	998040	635250	478230	157020	2245100	1404100	841020	0	0	0
F5H2B9;H0YNH8;Q9BZF9-2;Q9BZF9	F5H2B9;H0YNH8;Q9BZF9-2;Q9BZF9	1;1;1;1	1;1;1;1	1;1;1;1	Uveal autoantigen with coiled-coil domains and ankyrin repeats	UACA	150.53	1307	1307;1401;1403;1416	0.00078125	1.9209	0.57962	0.94976	43.524	NaN	NaN	NaN	NaN	NaN	NaN	NaN	NaN	NaN	1542400	926320	616130	875300	505980	369320	667150	420340	246810	0	0	0
Q86VP6;Q86VP6-2;A0A0C4DGH5;F5H6I6;H0YH27;Q86VP6-3	Q86VP6;Q86VP6-2;A0A0C4DGH5	13;10;7;1;1;1	13;10;7;1;1;1	12;9;7;1;1;1	Cullin-associated NEDD8-dissociated protein 1	CAND1	136.37	1230	1230;1062;770;54;442;403	0	24.891	0.60869	0.95057	18.829	0.45986	0.53281	0.95434	1.0232	0.82104	1.0045	19.829	22.369	18.622	46723000	27677000	19046000	7785600	5268600	2516900	16734000	11202000	5532200	22203000	11207000	10997000
O15143;C9JEY1;C9K057;A0A1W2PNV4;C9JBJ7;F8VXW2	O15143;C9JEY1;C9K057;A0A1W2PNV4	4;2;2;2;1;1	4;2;2;2;1;1	4;2;2;2;1;1	Actin-related protein 2/3 complex subunit 1B	ARPC1B	40.949	372	372;334;352;684;102;130	0	48.582	0.48392	0.95165	10.535	0.37357	0.52948	0.92688	0.9914	0.91786	0.99714	9.4198	10.977	15.506	38326000	22931000	15394000	9202500	6785000	2417500	11267000	6480000	4786900	17856000	9666400	8189900
Q5T123;Q9H299	Q5T123;Q9H299	2;2	2;2	2;2	SH3 domain-binding glutamic acid-rich-like protein 3	SH3BGRL3	9.3804	88	88;93	0	7.6473	0.62364	0.95191	6.3468	0.24065	0.52577	1.2701	0.62042	0.91013	1.2515	13.749	6.9758	5.476	111010000	61234000	49773000	12873000	10338000	2534000	37463000	24886000	12577000	60671000	26009000	34662000
E9PNW4;A0A2U3TZL5;P13987;P13987-2;H0YET2	E9PNW4;A0A2U3TZL5;P13987;P13987-2;H0YET2	4;4;4;4;2	4;4;4;4;2	4;4;4;4;2	CD59 glycoprotein	CD59	11.985	108	108;120;128;130;52	0	9.7244	0.70153	0.95256	22.01	0.37508	0.49623	0.88705	0.88752	0.84928	0.90508	96.945	69.929	23.46	50812000	31737000	19076000	3145700	2445000	700670	25972000	17805000	8167000	21695000	11487000	10208000
F8VVL1;O43583	F8VVL1;O43583	1;1	1;1	1;1	Density-regulated protein	DENR	17.77	160	160;198	0	323.31	0.90658	0.95291	18.615	NaN	NaN	1.0616	NaN	NaN	1.0864	NaN	NaN	18.335	9651700	5748500	3903200	4208600	3145200	1063400	1255000	760330	494710	4188100	1843000	2345100
A0A3B3ITK7;P36871;P36871-2;P36871-3	A0A3B3ITK7;P36871;P36871-2	18;17;13;8	18;17;13;8	18;17;13;8	Phosphoglucomutase-1	PGM1	63.957	584	584;562;580;365	0	74.711	0.4493	0.95313	42.882	0.49603	0.34172	1.3016	1.327	0.58966	1.4127	28.25	18.911	87.53	202070000	138670000	63406000	51625000	33348000	18277000	67003000	49434000	17569000	83445000	55885000	27560000
Q96CW5-2;Q96CW5	Q96CW5-2;Q96CW5	2;2	2;2	2;2	Gamma-tubulin complex component 3	TUBGCP3	93.884	824	824;907	0.0083763	1.1931	0.44636	0.95382	8.4461	NaN	NaN	NaN	NaN	NaN	NaN	NaN	NaN	NaN	22184000	14736000	7448300	5601500	3964700	1636800	16583000	10771000	5811500	0	0	0
Q9H3Z4	Q9H3Z4	1	1	1	DnaJ homolog subfamily C member 5	DNAJC5	22.149	198	198	0	14.278	0.57861	0.95493	19.682	NaN	NaN	NaN	NaN	NaN	NaN	NaN	NaN	NaN	1675300	1215100	460190	523160	420180	102980	1152100	794900	357210	0	0	0
A0A7P0T9R4;A0A2R8Y706;A0A2R8Y5T0;A0A7P0TA13;A0A7P0T9C4;Q14204;A0A7P0TAW9;A0A7P0T7V5;A0A7P0T916;A0A7P0TBJ7;A0A7P0T8N2;A0A7P0TB75;A0A7P0TAF3;A0A7P0T9K2;A0A2R8Y6H2;A0A2R8YFZ7;A0A7P0T8W5;A0A7P0T9F1;A0A7P0T825;A0A7P0TAM4;A0A7P0TAV5;A0A7P0TB64;A0A804HHY6;A0A7P0T990;A0A2R8YGC7;A0A7P0T942;A0A7P0T934;A0A7P0T9S3;A0A7P0T9Y3;A0A7P0TBC9;A0A7P0TAS7	A0A7P0T9R4;A0A2R8Y706;A0A2R8Y5T0;A0A7P0TA13;A0A7P0T9C4;Q14204;A0A7P0TAW9;A0A7P0T7V5;A0A7P0T916;A0A7P0TBJ7;A0A7P0T8N2;A0A7P0TB75;A0A7P0TAF3;A0A7P0T9K2;A0A2R8Y6H2;A0A2R8YFZ7;A0A7P0T8W5;A0A7P0T9F1;A0A7P0T825;A0A7P0TAM4;A0A7P0TAV5;A0A7P0TB64;A0A804HHY6;A0A7P0T990;A0A2R8YGC7;A0A7P0T942	40;40;40;40;40;40;39;38;36;35;35;34;34;32;32;30;30;30;29;29;25;25;24;24;23;23;17;17;9;7;1	40;40;40;40;40;40;39;38;36;35;35;34;34;32;32;30;30;30;29;29;25;25;24;24;23;23;17;17;9;7;1	40;40;40;40;40;40;39;38;36;35;35;34;34;32;32;30;30;30;29;29;25;25;24;24;23;23;17;17;9;7;1	Cytoplasmic dynein 1 heavy chain 1	DYNC1H1	517.86	4514	4514;4597;4604;4637;4672;4646;4459;4408;4234;4174;4179;3966;4001;3933;3965;3641;3668;3758;3547;3576;2941;2969;2881;2898;2726;2735;2341;2346;1372;1189;186	0	72.751	0.6	0.9553	24.196	0.34394	0.58984	1.0968	0.67503	0.90184	1.1633	26.493	23.912	23.849	102760000	62547000	40211000	22784000	16893000	5890100	44670000	29015000	15655000	35305000	16639000	18666000
P62258;P62258-2;B4DJF2;I3L3T1;K7EM20;I3L0W5;K7EIT4;F8WEB6;A2IDB1	P62258;P62258-2	15;11;6;6;5;4;3;1;1	15;11;6;6;5;4;3;1;1	12;9;4;4;4;3;2;0;0	14-3-3 protein epsilon	YWHAE	29.174	255	255;233;94;107;115;38;109;39;72	0	323.31	0.57113	0.95561	21.757	0.35716	0.53365	1.0529	0.89965	0.86336	1.0815	25.986	28.488	25.313	1754600000	977930000	776630000	252920000	181500000	71420000	353900000	223060000	130840000	1147700000	573370000	574370000
P63244;H0YAF8;H0YAM7;J3KPE3;H0Y8W2;D6RAC2;D6REE5;D6RFX4;D6R9Z1;D6R9L0;H0Y9P0;D6RF23;D6RFZ9;D6RHH4;H0Y8R5;D6RAU2;E9PD14;D6RBD0;D6RGK8;D6RHJ5;D6R909	P63244;H0YAF8;H0YAM7;J3KPE3;H0Y8W2;D6RAC2;D6REE5;D6RFX4;D6R9Z1;D6R9L0	7;6;6;6;6;5;5;4;4;4;3;3;3;3;2;2;2;2;1;1;1	7;6;6;6;6;5;5;4;4;4;3;3;3;3;2;2;2;2;1;1;1	7;6;6;6;6;5;5;4;4;4;3;3;3;3;2;2;2;2;1;1;1	Guanine nucleotide-binding protein subunit beta-2-like 1;Guanine nucleotide-binding protein subunit beta-2-like 1, N-terminally processed	GNB2L1	35.076	317	317;198;247;273;274;269;321;194;236;300;83;101;197;233;138;147;153;160;71;86;116	0	11.182	0.68405	0.95639	14.672	0.33174	0.68405	0.93203	0.89536	1.1089	0.98981	25.669	29.591	12.778	77243000	45662000	31582000	20820000	14691000	6129700	31640000	17232000	14408000	24782000	13739000	11044000
Q9H2D6-3;Q9H2D6-2;Q9H2D6;F6WYE2;H0Y5J9;Q9H2D6-6;Q9H2D6-5;Q9H2D6-7;F6TR96;Q9H2D6-4	Q9H2D6-3;Q9H2D6-2;Q9H2D6;F6WYE2;H0Y5J9;Q9H2D6-6;Q9H2D6-5;Q9H2D6-7	3;3;3;2;2;2;2;2;1;1	3;3;3;2;2;2;2;2;1;1	3;3;3;2;2;2;2;2;1;1	TRIO and F-actin-binding protein	TRIOBP	243.07	2193	2193;2267;2365;256;311;431;593;652;265;1144	0	3.2881	0.49223	0.95729	29.909	NaN	NaN	NaN	NaN	NaN	NaN	NaN	NaN	NaN	4030200	2752100	1278100	1609200	1298800	310380	2421000	1453300	967740	0	0	0
P19367-4;P19367-2;P19367;P19367-3;B1AR62	P19367-4;P19367-2;P19367;P19367-3	5;5;5;5;2	5;5;5;5;2	5;5;5;5;2	Hexokinase-1	HK1	101.08	905	905;916;917;921;114	0	3.2604	0.44356	0.95797	38.905	NaN	0.40517	NaN	NaN	0.68863	NaN	NaN	46.685	NaN	6144100	4450200	1693900	1589900	1115000	474950	4554200	3335200	1218900	0	0	0
P48643;E7ENZ3;B7ZAR1;E9PCA1;P48643-2;D6RIZ7	P48643;E7ENZ3;B7ZAR1;E9PCA1;P48643-2	7;6;6;6;5;1	7;6;6;6;5;1	7;6;6;6;5;1	T-complex protein 1 subunit epsilon	CCT5	59.67	541	541;486;503;520;448;44	0	11.958	0.74391	0.95803	43.016	0.34858	0.64145	0.77389	0.92295	1.0046	0.85394	61.009	24.921	17.17	21705000	12981000	8723800	11503000	7442500	4060900	6331400	3712800	2618500	3869900	1825400	2044400
O75531;E9PJJ8	O75531;E9PJJ8	2;1	2;1	2;1	Barrier-to-autointegration factor;Barrier-to-autointegration factor, N-terminally processed	BANF1	10.058	89	89;28	0	7.6215	0.45445	0.95932	37.845	0.45445	NaN	NaN	1.0309	NaN	NaN	23.794	NaN	NaN	11041000	7175200	3866200	3182600	2183000	999580	4186200	3336900	849280	3672600	1655300	2017400
Q14764;H3BQK6;H3BRL2;H3BUK7;H3BNF6	Q14764	17;4;3;1;1	17;4;3;1;1	17;4;3;1;1	Major vault protein	MVP	99.326	893	893;220;148;107;144	0	80.257	0.60235	0.96021	17.194	0.49631	0.56988	0.82176	1.228	0.93867	0.89033	30.465	19.584	7.3011	160910000	94313000	66595000	30794000	19405000	11389000	60321000	38504000	21817000	69793000	36404000	33389000
P49720;A0A087WXQ8;A0A087WY10;A0A087WUL2	P49720	3;1;1;1	3;1;1;1	3;1;1;1	Proteasome subunit beta type-3	PSMB3	22.949	205	205;107;112;145	0	4.9713	0.74408	0.96024	16.578	0.35726	0.53321	0.82023	0.70618	0.89939	0.89332	9.447	58.159	13.124	10059000	6356400	3702100	2095700	1535900	559840	3853300	2564600	1288700	4109600	2256000	1853600
Q96IX5	Q96IX5	1	1	1	Up-regulated during skeletal muscle growth protein 5	USMG5	6.4575	58	58	0	77.174	0.71752	0.96032	14.547	NaN	NaN	0.97717	NaN	NaN	1.0758	NaN	NaN	19.2	11486000	6840500	4645700	2625100	1860500	764630	2309300	1363400	945960	6551800	3616700	2935100
P53396-2;P53396;P53396-3	P53396-2;P53396;P53396-3	12;12;10	12;12;10	12;12;10	ATP-citrate synthase	ACLY	119.77	1091	1091;1101;830	0	22.099	0.75657	0.96073	22.274	0.32277	0.87258	0.78743	0.66204	1.3435	0.84044	39.724	39.034	19.797	40585000	23539000	17045000	10703000	7621600	3081700	15803000	8198600	7603900	14079000	7719200	6359800
M0QZN2;M0R0F0;M0R0R2;P46782	M0QZN2;M0R0F0;M0R0R2;P46782	4;4;4;4	4;4;4;4	4;4;4;4	40S ribosomal protein S5;40S ribosomal protein S5, N-terminally processed	RPS5	14.763	134	134;200;225;204	0	22.713	0.59366	0.96154	9.6629	0.33687	0.65066	0.76028	0.90425	1.0971	0.84447	43.425	16.853	9.0811	50603000	31978000	18625000	15793000	11760000	4032900	20372000	12263000	8109800	14437000	7955300	6481800
E9PIR7;F8W809;A0A087WSW9;A0A182DWI3;A0A087WSY9;Q16881-5;Q16881-2;Q16881-4;Q16881-3;Q16881-6;Q16881;E2QRB9;Q16881-7;E9PKD3;A0A0B4J225;E9PIZ5;E9PLT3;E9PKI4;E9PQI3;A0A096LPD9;E7EWK1;A0A096LPK7;A0A182DWF2;D3YTF8;A0A182DWF3;Q9NNW7-2;Q9NNW7	E9PIR7;F8W809;A0A087WSW9;A0A182DWI3;A0A087WSY9;Q16881-5;Q16881-2;Q16881-4;Q16881-3;Q16881-6;Q16881;E2QRB9;Q16881-7	13;13;13;13;13;13;13;13;13;13;13;11;11;6;4;4;3;3;2;1;1;1;1;1;1;1;1	13;13;13;13;13;13;13;13;13;13;13;11;11;6;4;4;3;3;2;1;1;1;1;1;1;1;1	13;13;13;13;13;13;13;13;13;13;13;11;11;6;4;4;3;3;2;1;1;1;1;1;1;1;1	Thioredoxin reductase 1, cytoplasmic	TXNRD1	53.166	482	482;498;548;568;648;499;543;551;598;614;649;460;461;175;103;139;70;72;53;306;338;463;494;501;523;498;524	0	57.631	0.5391	0.96185	44.981	0.39949	0.33437	1.7315	0.89988	0.52822	1.8124	40.449	36.996	21.274	184760000	103800000	80965000	37379000	27306000	10073000	59263000	43933000	15330000	88121000	32559000	55562000
P53618;E9PP73;E9PP63;E9PKQ1	P53618;E9PP73	9;6;2;2	9;6;2;2	9;6;2;2	Coatomer subunit beta	COPB1	107.14	953	953;485;132;137	0	24.391	0.62442	0.96212	13.196	0.41208	0.63831	0.90895	0.9473	0.98986	0.9915	46	43.745	22.01	24287000	13992000	10296000	7313100	5315900	1997200	8423700	4496300	3927400	8550600	4179400	4371200
Q16222-2;Q16222-3;Q16222	Q16222-2;Q16222-3;Q16222	3;3;3	3;3;3	3;3;3	UDP-N-acetylhexosamine pyrophosphorylase;UDP-N-acetylgalactosamine pyrophosphorylase;UDP-N-acetylglucosamine pyrophosphorylase	UAP1	57.028	505	505;521;522	0	9.3188	0.41012	0.96252	28.327	NaN	0.41012	NaN	NaN	0.58735	NaN	NaN	8.417	NaN	4580000	3145400	1434500	1400700	1201100	199610	1667200	952940	714230	1512100	991360	520690
H0YD13;H0Y2P0;P16070-18;P16070-12;P16070-14;P16070-13;P16070-11;P16070-10;P16070-16;P16070-8;P16070-17;P16070-6;P16070-4;P16070-3;P16070-7;P16070-5;P16070;H0YE40;H0YDX6;H0YDW7;H0YCV9;H0Y5E4;P16070-15;P16070-9;E9PKC6;H0YD17;J3KN83;Q86UZ1;P16070-19	H0YD13;H0Y2P0;P16070-18;P16070-12;P16070-14;P16070-13;P16070-11;P16070-10;P16070-16;P16070-8;P16070-17;P16070-6;P16070-4;P16070-3;P16070-7;P16070-5;P16070;H0YE40	7;7;7;7;7;7;7;7;7;7;7;7;7;7;7;7;7;4;3;3;3;3;3;3;2;2;2;1;1	7;7;7;7;7;7;7;7;7;7;7;7;7;7;7;7;7;4;3;3;3;3;3;3;2;2;2;1;1	7;7;7;7;7;7;7;7;7;7;7;7;7;7;7;7;7;4;3;3;3;3;3;3;2;2;2;1;1	CD44 antigen	CD44	22.683	206	206;287;340;361;396;425;429;493;668;674;691;699;699;711;713;734;742;82;183;240;277;294;294;675;78;229;232;80;139	0	307.28	0.60816	0.96342	14.443	0.27778	0.62943	0.92159	0.74429	1.0718	0.95615	37.698	15.86	9.6943	248620000	145050000	103570000	41056000	31750000	9306500	57341000	35022000	22319000	150220000	78275000	71948000
A0A075B6F6;A0A0S2Z6F0;A0A3B3IT72;A0A3B3IUB5;Q8TCT9-5;Q8TCT9;Q8TCT9-4;Q8TCT9-2;A0A0C4DGU3	A0A075B6F6;A0A0S2Z6F0;A0A3B3IT72;A0A3B3IUB5;Q8TCT9-5;Q8TCT9;Q8TCT9-4;Q8TCT9-2;A0A0C4DGU3	2;2;2;2;2;2;2;2;1	2;2;2;2;2;2;2;2;1	2;2;2;2;2;2;2;2;1	Minor histocompatibility antigen H13	HM13	30.162	272	272;345;365;420;335;377;394;426;143	0	2.8921	0.63476	0.96389	75.052	0.58336	NaN	NaN	1.3806	NaN	NaN	98.907	NaN	NaN	6935700	4109300	2826400	3527600	1920800	1606900	1285500	740330	545200	2122500	1448200	674300
Q99733;Q99733-2;A8MXH2;C9J6D1;C9JZI7;E9PNW0;E9PJJ2;E9PS34;E9PNJ7;E9PKT8;E9PKI2;E9PP22;H0YCI4;C9J1B1	Q99733;Q99733-2;A8MXH2;C9J6D1;C9JZI7;E9PNW0;E9PJJ2;E9PS34;E9PNJ7;E9PKT8	6;6;5;5;5;4;4;4;4;4;2;2;2;1	6;6;5;5;5;4;4;4;4;4;2;2;2;1	5;5;4;4;4;3;3;3;3;3;2;2;2;1	Nucleosome assembly protein 1-like 4	NAP1L4	42.823	375	375;386;156;178;278;107;128;133;140;169;78;154;204;101	0	51.079	0.7867	0.96435	7.4224	0.4057	0.72049	0.83907	0.90562	1.1837	0.88178	54.871	10.611	3.2886	19684000	11874000	7810400	4166900	3051200	1115700	8216000	5025000	3191100	7301400	3797700	3503700
Q8WUH6	Q8WUH6	2	2	2	Transmembrane protein 263	TMEM263	11.748	116	116	0	5.138	0.59487	0.96474	47.178	NaN	NaN	NaN	NaN	NaN	NaN	NaN	NaN	NaN	4074400	2499200	1575200	1277400	988340	289080	1593400	1017500	575900	1203500	493300	710220
P48735-2;P48735;H0YL11	P48735-2;P48735	6;6;2	5;5;2	5;5;2	Isocitrate dehydrogenase [NADP], mitochondrial	IDH2	45.179	400	400;452;312	0	112.84	0.83556	0.9662	14.913	0.58396	0.52204	0.91631	1.1746	0.82377	0.9662	21.928	16.075	14.913	16317000	9171100	7145700	1498500	873640	624890	2638600	1866700	771940	12180000	6430800	5748800
Q8WUM4;Q8WUM4-2;A0A3B3IT07;Q8WUM4-3;F8WEQ7;F8WBR8;C9IZF9;F8WDK9	Q8WUM4;Q8WUM4-2	9;9;3;3;2;2;2;1	9;9;3;3;2;2;2;1	9;9;3;3;2;2;2;1	Programmed cell death 6-interacting protein	PDCD6IP	96.022	868	868;873;300;271;72;78;153;95	0	12.527	0.63208	0.96627	50.791	1.2225	0.5837	0.87718	3.2244	0.95761	0.91144	107.1	17.429	68.036	36558000	19718000	16841000	7165900	4377700	2788200	14430000	8989300	5440600	14963000	6350500	8612100
Q06416	Q06416	1	1	1	Putative POU domain, class 5, transcription factor 1B	POU5F1B	38.587	359	359	1	-2	0.4471	0.96637	1.5871	NaN	NaN	NaN	NaN	NaN	NaN	NaN	NaN	NaN	8081200	5445600	2635600	2950300	2255100	695240	5130900	3190500	1940300	0	0	0
B1AUU8;P42566	B1AUU8;P42566	1;1	1;1	1;1	Epidermal growth factor receptor substrate 15	EPS15	83.653	762	762;896	0	2.4851	0.8018	0.96666	49.382	NaN	NaN	NaN	NaN	NaN	NaN	NaN	NaN	NaN	1009700	515560	494150	0	0	0	505340	330220	175120	504380	185340	319030
A0A7I2V4E4;Q15056-2;Q15056;A0A7I2V385;A0A7I2V3D5;A0A7I2V3E4	A0A7I2V4E4;Q15056-2;Q15056;A0A7I2V385	3;3;3;2;1;1	3;3;3;2;1;1	3;3;3;2;1;1	Eukaryotic translation initiation factor 4H	EIF4H	27.058	245	245;228;248;197;69;111	0	8.548	0.82041	0.96741	57.029	NaN	0.53036	0.92903	NaN	0.91492	0.96741	NaN	94.617	27.993	20411000	12027000	8383900	3580300	2425000	1155400	8722800	5473200	3249500	8107900	4128900	3979000
P07737;K7EJ44;I3L3D5	P07737;K7EJ44	8;5;3	8;5;3	4;3;2	Profilin-1	PFN1	15.054	140	140;104;165	0	323.31	0.53095	0.96775	8.7517	0.31179	0.52452	1.1078	0.76052	0.89677	1.1643	16.073	21.066	13.367	483960000	291400000	192560000	124140000	93297000	30844000	171870000	112040000	59835000	187950000	86066000	101880000
A0A2R8Y6J3;P46777;Q5T7N0;A0A2R8Y4A2	A0A2R8Y6J3;P46777	4;4;1;1	4;4;1;1	4;4;1;1	60S ribosomal protein L5	RPL5	27.045	238	238;297;130;170	0	8.6336	0.61867	0.96885	19.805	0.37009	0.61804	0.87623	0.92561	1.0791	0.97372	30.988	15.457	21.246	59292000	35619000	23673000	14290000	9965000	4325300	24333000	14563000	9770300	20669000	11092000	9577500
Q14192	Q14192	7	7	7	Four and a half LIM domains protein 2	FHL2	32.193	279	279	0	163.51	0.55509	0.96924	45.854	0.53666	0.52834	3.3762	1.3404	0.86115	3.5209	38.199	11.746	104.95	63377000	27508000	35869000	8695500	5327500	3367900	22065000	13927000	8138200	32616000	8253400	24363000
P14550;V9GYG2;V9GYP9;Q5T621	P14550	5;2;2;2	5;2;2;2	5;2;2;2	Alcohol dehydrogenase [NADP(+)]	AKR1A1	36.573	325	325;119;140;147	0	6.7542	0.6503	0.97033	14.575	0.46833	0.47699	0.9267	0.89573	0.67127	0.977	19.274	11.426	45.728	16110000	9139100	6970700	3117800	2015300	1102600	5649100	3855400	1793700	7342900	3268500	4074400
Q8NDC0	Q8NDC0	1	1	1	MAPK-interacting and spindle-stabilizing protein-like	MAPK1IP1L	24.269	245	245	0	12.643	0.64206	0.97088	90.233	NaN	NaN	NaN	NaN	NaN	NaN	NaN	NaN	NaN	3588900	1985200	1603700	1539100	1181000	358140	0	0	0	2049800	804220	1245600
F8VZJ2;F8VNW4;F8W0W4;A0A7I2V2K5;H0YHX9;A0A7I2V473;Q13765;E9PAV3-2;E9PAV3	F8VZJ2;F8VNW4;F8W0W4;A0A7I2V2K5;H0YHX9;A0A7I2V473;Q13765;E9PAV3-2;E9PAV3	2;2;2;2;2;2;2;2;2	2;2;2;2;2;2;2;2;2	2;2;2;2;2;2;2;2;2	Nascent polypeptide-associated complex subunit alpha;Nascent polypeptide-associated complex subunit alpha, muscle-specific form	NACA	15.016	136	136;148;198;211;235;295;215;925;2078	0	78.735	0.71733	0.97092	17.599	0.33444	0.62668	NaN	0.86096	1.0152	NaN	22.677	11.98	NaN	10341000	6408700	3932700	4207800	2727600	1480200	6133600	3681000	2452500	0	0	0
Q9Y617;Q9Y617-2	Q9Y617;Q9Y617-2	9;8	9;8	9;8	Phosphoserine aminotransferase	PSAT1	40.422	370	370;324	0	14.177	0.52153	0.97112	24.199	0.34535	0.96045	NaN	0.86965	1.5524	NaN	9.3076	18.431	NaN	22277000	14731000	7546600	14195000	10505000	3689400	7502200	4160800	3341400	580120	64371	515750
O95292	O95292	2	2	2	Vesicle-associated membrane protein-associated protein B/C	VAPB	27.228	243	243	0	14.92	0.98484	0.97144	9.8845	NaN	NaN	NaN	NaN	NaN	NaN	NaN	NaN	NaN	4072100	2162100	1910000	912000	631220	280780	1312800	799990	512790	1847300	730920	1116400
P46108-2;P46108;I3L297	P46108-2;P46108;I3L297	2;2;1	2;2;1	2;2;1	Adapter molecule crk	CRK	22.905	204	204;304;223	0	15.785	0.80158	0.97159	5.1132	NaN	0.6835	0.91242	NaN	0.92716	0.99073	NaN	5.6055	1.7441	2586200	1479800	1106400	0	0	0	1065100	658730	406360	1521100	821110	700020
Q15836	Q15836	3	3	2	Vesicle-associated membrane protein 3	VAMP3	11.309	100	100	0	30.584	0.38035	0.97172	28.84	0.36527	NaN	NaN	0.69782	NaN	NaN	28.686	NaN	NaN	15249000	9695700	5553700	5567100	3788500	1778600	4597000	3154500	1442500	5085400	2752700	2332700
P36542-2;P36542	P36542-2;P36542	2;2	2;2	2;2	ATP synthase subunit gamma, mitochondrial	ATP5C1	32.881	297	297;298	0	2.3007	0.62949	0.97219	27.982	NaN	0.62949	1.0146	NaN	1.0206	1.081	NaN	21.112	42.985	7626700	4726800	2899900	1013500	775240	238220	3005800	2026400	979330	3607400	1925100	1682300
A0A0U1RQT8;Q8TCZ2-6;Q8TCZ2-3;Q8TCZ2-2;Q8TCZ2;Q8TCZ2-5	A0A0U1RQT8;Q8TCZ2-6;Q8TCZ2-3;Q8TCZ2-2;Q8TCZ2;Q8TCZ2-5	1;1;1;1;1;1	1;1;1;1;1;1	1;1;1;1;1;1	CD99 antigen-like protein 2	CD99L2	18.663	177	177;189;190;213;262;272	0.0028309	1.5155	0.45788	0.97228	27.205	NaN	NaN	NaN	NaN	NaN	NaN	NaN	NaN	NaN	3970700	2669200	1301400	2482500	1754600	727970	1488100	914670	573460	0	0	0
P22307-6;P22307-2;P22307-4;P22307-7;P22307-8;P22307;H0YF61	P22307-6;P22307-2;P22307-4;P22307-7;P22307-8;P22307;H0YF61	4;4;4;4;4;4;3	4;4;4;4;4;4;3	4;4;4;4;4;4;3	Non-specific lipid-transfer protein	SCP2	15.079	140	140;143;466;503;523;547;140	0	7.3256	0.75221	0.97231	9.8047	0.41751	0.73971	0.82953	0.74903	1.2002	0.89931	37.743	23.368	17.555	25420000	15178000	10242000	1805600	1238600	567040	9787300	5879000	3908300	13828000	8060900	5766700
A0A087WZK9;B3KS98;O15372;E5RHC7;E5RH59;E5RFW7;E5RFH0;E5RGU4	A0A087WZK9;B3KS98;O15372;E5RHC7;E5RH59;E5RFW7;E5RFH0;E5RGU4	2;2;2;1;1;1;1;1	2;2;2;1;1;1;1;1	2;2;2;1;1;1;1;1	Eukaryotic translation initiation factor 3 subunit H	EIF3H	39.589	349	349;366;352;46;56;97;170;235	0	120.29	0.84059	0.9724	19.333	0.38793	NaN	NaN	0.89516	NaN	NaN	32.186	NaN	NaN	13662000	8064000	5597900	3214800	2202900	1011900	3710000	2380500	1329500	6737200	3480600	3256600
H0YHC3;F8W020;F8W118;F8VXI6;F8VUX1;F8VY35;F8VV59;B7Z9C2;F8W0J6;F5H4R6;H0YIV4;P55209-3;P55209-2;P55209;F8VRJ2;H0YH88;F8W543;F8VVB5	H0YHC3;F8W020;F8W118;F8VXI6;F8VUX1;F8VY35;F8VV59;B7Z9C2;F8W0J6;F5H4R6;H0YIV4;P55209-3;P55209-2;P55209;F8VRJ2;H0YH88;F8W543;F8VVB5	4;4;4;4;4;4;4;4;4;4;4;4;4;4;3;3;3;2	3;3;3;3;3;3;3;3;3;3;3;3;3;3;2;2;2;1	3;3;3;3;3;3;3;3;3;3;3;3;3;3;2;2;2;1	Nucleosome assembly protein 1-like 1	NAP1L1	23.417	198	198;207;209;215;237;264;327;349;379;383;385;323;368;391;114;177;328;161	0	18.699	0.63744	0.97265	13.625	0.29671	0.85146	0.79586	0.70061	1.4508	0.88331	88.451	102.66	165.66	17916000	10480000	7435600	4103800	2914600	1189300	6866100	3950400	2915700	6945700	3615000	3330700
P28070	P28070	2	2	2	Proteasome subunit beta type-4	PSMB4	29.204	264	264	0	3.0114	0.54528	0.97267	15.989	0.46568	NaN	NaN	0.86171	NaN	NaN	17.129	NaN	NaN	2534300	1901800	632490	1450100	1218000	232090	0	0	0	1084200	683850	400400
O15511;B1ALC0;O15511-2	O15511;B1ALC0;O15511-2	4;3;3	4;3;3	4;3;3	Actin-related protein 2/3 complex subunit 5	ARPC5	16.32	151	151;135;154	0	12.513	0.71084	0.97318	66.412	0.27041	0.46739	NaN	0.5711	0.75099	NaN	49.528	61.42	NaN	11944000	7308200	4635800	2379200	1766000	613140	6609300	3967900	2641400	2955600	1574300	1381300
K7ER90;K7EL20;O75821;K7EL60;K7ENA8	K7ER90;K7EL20;O75821;K7EL60;K7ENA8	2;2;2;1;1	2;2;2;1;1	2;2;2;1;1	Eukaryotic translation initiation factor 3 subunit G	EIF3G	25.441	227	227;262;320;149;289	0	2.603	0.61558	0.97362	12.544	NaN	0.61558	NaN	NaN	0.97362	NaN	NaN	12.544	NaN	2701400	1693100	1008300	0	0	0	2701400	1693100	1008300	0	0	0
G3V3I1;G3V295;G3V5Z7;P60900-2;P60900;G3V3U4;P60900-3;H0YJC4	G3V3I1;G3V295;G3V5Z7;P60900-2;P60900;G3V3U4;P60900-3	4;4;4;4;4;2;2;1	4;4;4;4;4;2;2;1	4;4;4;4;4;2;2;1	Proteasome subunit alpha type;Proteasome subunit alpha type-6	PSMA6	16.645	148	148;203;252;227;246;107;167;85	0	8.6196	0.61027	0.97372	6.2128	0.29076	0.58913	1.1517	0.64737	0.95652	1.2866	19.686	4.5239	6.7979	21358000	12567000	8791600	3226700	2464200	762510	6912800	4495700	2417100	11219000	5606700	5611900
Q5VTE0;P68104;A0A087WVQ9;A0A7I2V659;A0A7I2V5N4;A0A7I2V3H3;A0A087WV01;A0A2U3TZH3;Q05639;A0A2R8Y488;A6PW80;Q5JR01;A0A2R8Y660;A0A2R8YDN5;A0A6Q8PFK6	Q5VTE0;P68104;A0A087WVQ9;A0A7I2V659;A0A7I2V5N4;A0A7I2V3H3;A0A087WV01	22;22;21;20;19;18;17;7;7;5;4;4;4;3;1	22;22;21;20;19;18;17;7;7;5;4;4;4;3;1	22;22;21;20;19;18;17;7;7;5;4;4;4;3;1	Putative elongation factor 1-alpha-like 3;Elongation factor 1-alpha 1;Elongation factor 1-alpha	EEF1A1P5;EEF1A1	50.184	462	462;462;459;459;433;376;426;496;463;173;106;145;152;106;59	0	245.91	0.68417	0.9738	27.059	0.33126	0.65861	1.0654	0.87629	1.0096	1.1369	33.883	65.455	34.829	2337300000	1397100000	940130000	733730000	545510000	188210000	679880000	390800000	289080000	923650000	460810000	462840000
Q8IWE2;Q8IWE2-2;D6R9C9	Q8IWE2;Q8IWE2-2	8;5;1	8;5;1	8;5;1	Protein NOXP20	FAM114A1	60.741	563	563;356;133	0	176.5	0.73123	0.97396	8.6559	0.30291	0.5879	0.92997	0.57677	0.97907	0.96888	46.814	13.936	1.983	24668000	13916000	10752000	5279000	4254500	1024500	8614000	5081800	3532200	10775000	4579700	6195100
A0A087WTT1;A0A7I2V649;E7EQV3;H0YAR2;E7ERJ7;A0A7I2YQ88;P11940-2;P11940;A0A7I2V4N4;A0A7I2V4L7;A0A7I2YQ90;B1ANR0;Q13310-2;Q13310;Q13310-3;E5RGH3;E5RH24;E5RJB9;B1ANR1;H0YBN4;A0A7I2YQE4;A0A7I2V5W9;E5RHG7;H0YEQ8;H0YAP2;H0YB86;A0A6I8PS38;A0A6I8PLA1;A0A7I2V4V6;H0YEU6;H0Y5F5;A0A7I2V598;A0A6Q8JFT6;Q4VXU2	A0A087WTT1;A0A7I2V649;E7EQV3;H0YAR2;E7ERJ7;A0A7I2YQ88;P11940-2;P11940;A0A7I2V4N4;A0A7I2V4L7;A0A7I2YQ90;B1ANR0;Q13310-2;Q13310;Q13310-3;E5RGH3;E5RH24;E5RJB9;B1ANR1;H0YBN4;A0A7I2YQE4;A0A7I2V5W9	4;4;4;4;4;4;4;4;3;3;3;3;3;3;3;2;2;2;2;2;2;2;1;1;1;1;1;1;1;1;1;1;1;1	4;4;4;4;4;4;4;4;3;3;3;3;3;3;3;2;2;2;2;2;2;2;1;1;1;1;1;1;1;1;1;1;1;1	2;2;2;2;2;2;2;2;1;2;2;2;2;2;2;2;2;2;2;2;0;1;1;1;0;0;0;0;0;0;0;0;0;0	Polyadenylate-binding protein;Polyadenylate-binding protein 1;Polyadenylate-binding protein 4	PABPC1;PABPC4	65.24	588	588;590;591;599;604;633;547;636;577;601;604;615;631;644;660;108;118;129;129;174;565;598;75;112;131;165;174;199;354;370;550;584;619;614	0	9.8129	0.795	0.97457	28.393	NaN	0.51194	0.89863	NaN	0.77285	0.93996	NaN	37.911	14.505	7998700	4641000	3357700	569030	422640	146400	2349000	1606700	742310	5080700	2611700	2469000
H3BQI1;B1AKR6;Q9NP97;Q8TF09	H3BQI1;B1AKR6;Q9NP97;Q8TF09	1;1;1;1	1;1;1;1	1;1;1;1	Dynein light chain roadblock-type 1;Dynein light chain roadblock-type 2	DYNLRB2;DYNLRB1	13.852	125	125;148;96;96	0.00077942	1.9009	0.64124	0.97506	59.035	NaN	NaN	NaN	NaN	NaN	NaN	NaN	NaN	NaN	3685100	2159400	1525600	1465700	1148300	317420	0	0	0	2219400	1011100	1208200
Q9UMX0-3;Q9UMX0-2;Q9UMX0;H0YDS0;Q9UMX0-4;Q9NRR5	Q9UMX0-3;Q9UMX0-2;Q9UMX0	3;3;3;1;1;1	3;3;3;1;1;1	2;2;2;1;1;1	Ubiquilin-1	UBQLN1	43.037	412	412;561;589;157;181;601	0	20.882	0.75374	0.97597	22.344	NaN	0.57965	0.89182	NaN	0.88713	0.96289	NaN	29.282	26.743	10995000	6853500	4141200	1435500	1354900	80566	2520200	1380200	1140100	7039000	4118400	2920600
A0A494C017;C9JJV6;C9JZL8;A0A499FIY8;C9JC07;Q96S97	A0A494C017;C9JJV6;C9JZL8;A0A499FIY8;C9JC07;Q96S97	2;2;2;2;2;2	2;2;2;2;2;2	2;2;2;2;2;2	Myeloid-associated differentiation marker	MYADM	13.153	122	122;146;188;203;259;322	0	25.987	0.65233	0.97602	42.945	0.2848	0.46024	1.6378	0.6402	0.74434	1.7471	12.071	22.468	3.2796	29081000	16458000	12623000	3234500	2383000	851580	12998000	8760200	4238200	12848000	5315100	7532900
E5RHG8;Q15369;R4GMY8;Q15369-2	E5RHG8;Q15369;R4GMY8;Q15369-2	4;4;3;2	4;4;3;2	3;3;2;2	Transcription elongation factor B polypeptide 1	TCEB1	9.9601	89	89;112;65;96	0	7.2226	0.53259	0.97605	20.783	0.50535	0.55501	NaN	1.005	0.83239	NaN	5.858	5.2331	NaN	9454600	5961900	3492700	4071400	2950100	1121300	3848200	2399900	1448400	1534900	611960	922960
P54727;Q5W0S5;P54727-2;H0Y579	P54727;Q5W0S5;P54727-2	8;4;4;1	8;4;4;1	5;1;4;1	UV excision repair protein RAD23 homolog B	RAD23B	43.171	409	409;146;337;114	0	7.3705	0.69795	0.97646	14.73	0.31906	0.67037	0.77789	0.79946	1.1217	0.81768	15.317	25.231	11.036	45558000	27655000	17903000	6270600	4613000	1657600	21341000	12628000	8713400	17946000	10414000	7532400
E5RI99;P62888;A0A0B4J213;A0A0C4DH44	E5RI99;P62888;A0A0B4J213	4;4;2;1	4;4;2;1	4;4;2;1	60S ribosomal protein L30	RPL30	12.656	114	114;115;51;96	0	4.9866	0.78327	0.97654	5.68	NaN	0.49089	0.99097	NaN	0.75574	1.0711	NaN	24.928	40.086	10613000	6121100	4492100	568560	415200	153360	4953600	3249300	1704300	5091000	2456600	2634400
A0A7I2V5Y3;P20290-2;P20290	A0A7I2V5Y3;P20290-2;P20290	1;1;1	1;1;1	1;1;1	Transcription factor BTF3	BTF3	10.669	99	99;162;206	0.0047651	1.3838	0.92576	0.97751	26.381	NaN	NaN	NaN	NaN	NaN	NaN	NaN	NaN	NaN	3718900	2081700	1637200	745890	476520	269360	1288300	722960	565390	1684600	882160	802480
P63104;E7EX29;B0AZS6;P63104-2;B7Z2E6;H0YB80;E7ESK7;E5RIR4;E9PD24;E7EVZ2;E5RGE1	P63104;E7EX29;B0AZS6;P63104-2;B7Z2E6;H0YB80;E7ESK7	14;12;9;8;7;7;7;5;5;5;4	11;9;8;7;6;6;5;3;3;3;2	10;8;7;6;5;5;5;3;3;3;2	14-3-3 protein zeta/delta	YWHAZ	27.745	245	245;246;168;170;125;130;137;75;92;98;51	0	323.31	0.54693	0.9782	23.156	0.36048	0.52512	1.0378	0.9575	0.83709	1.063	18.035	40.56	13.644	467500000	277200000	190310000	85135000	60494000	24641000	179280000	119940000	59342000	203090000	96766000	106320000
P60842;J3KT12;P60842-2;J3KTB5;J3QR64;J3QL43;J3QS69;J3QLN6;J3QKZ9;J3KS25;J3KSZ0;J3KTN0;J3QL52	P60842;J3KT12;P60842-2;J3KTB5;J3QR64;J3QL43;J3QS69;J3QLN6	9;8;8;7;6;6;6;5;4;4;4;3;1	4;4;4;3;2;2;3;1;1;1;3;2;1	4;4;4;3;2;2;3;1;1;1;3;2;1	Eukaryotic initiation factor 4A-I	EIF4A1	46.153	406	406;341;347;257;214;271;300;163;134;187;230;117;68	0	4.3648	0.47916	0.97834	22.485	0.35373	0.71051	0.91479	0.88848	1.207	0.9852	18.389	2.2074	0.98808	24710000	15297000	9412400	8912800	6405200	2507600	8105800	4864400	3241400	7691000	4027500	3663400
O43237-2;O43237;J3KRI4;J3KRZ2;J3KSD2;H3BUM4	O43237-2;O43237;J3KRI4	6;6;4;2;1;1	6;6;4;2;1;1	6;6;4;2;1;1	Cytoplasmic dynein 1 light intermediate chain 2	DYNC1LI2	45.004	415	415;492;167;92;49;186	0	59.343	0.56706	0.9792	81.237	0.31059	0.73076	NaN	0.68128	1.096	NaN	30.863	105.68	NaN	12040000	6521900	5518100	3548800	2580300	968520	5143800	2675400	2468400	3347400	1266200	2081200
P39019;A0A075B6E2;M0R2L9;M0QYF7;M0R140	P39019	5;2;2;2;2	5;2;2;2;2	5;2;2;2;2	40S ribosomal protein S19	RPS19	16.06	145	145;71;71;100;102	0	8.2117	0.74042	0.97932	24.911	0.34917	0.57725	0.80852	0.93448	0.99792	0.84337	44.513	30.332	9.1542	73159000	44049000	29109000	14909000	10800000	4109700	18957000	11696000	7260600	39293000	21554000	17739000
E7EQU2;E7EV09;E7EQL5;Q13409-6;Q13409-3;Q13409-2;E7ETL8;E7ESD3;E7EMU4;Q13409-7;Q13409-5;Q13409;E9PGG1;E7ET01;E7EUM4;E7ERR6;E7ERH4;E7EU01	E7EQU2;E7EV09;E7EQL5;Q13409-6;Q13409-3;Q13409-2;E7ETL8;E7ESD3;E7EMU4;Q13409-7;Q13409-5;Q13409;E9PGG1;E7ET01	5;5;5;5;5;5;4;4;4;4;4;4;3;3;2;2;2;1	5;5;5;5;5;5;4;4;4;4;4;4;3;3;2;2;2;1	5;5;5;5;5;5;4;4;4;4;4;4;3;3;2;2;2;1	Cytoplasmic dynein 1 intermediate chain 2	DYNC1I2	20.756	185	185;250;305;611;612;632;184;187;214;630;637;638;110;173;137;139;151;121	0	131.87	0.63156	0.97955	12.061	0.40203	0.58144	0.98767	0.87403	0.90948	1.0728	7.0568	27.77	6.972	29182000	16907000	12275000	6056200	4225700	1830500	8291900	5134500	3157500	14834000	7546700	7287400
A0A087WXM6;J3QQT2;J3KRX5;A0A0A6YYL6;P18621;P18621-3;A0A087WY81;J3KRB3;A0A087WWH0;J3QS96;J3QLC8;A0A0A0MRF8;P18621-2;J3KSJ0	A0A087WXM6;J3QQT2;J3KRX5;A0A0A6YYL6;P18621;P18621-3;A0A087WY81;J3KRB3;A0A087WWH0;J3QS96;J3QLC8;A0A0A0MRF8;P18621-2	3;3;3;3;3;3;2;2;2;2;2;2;2;1	3;3;3;3;3;3;2;2;2;2;2;2;2;1	3;3;3;3;3;3;2;2;2;2;2;2;2;1	60S ribosomal protein L17	RPL17;RPL17-C18orf32	19.586	169	169;171;174;228;184;228;97;129;131;138;174;190;146;56	0	3.784	0.46034	0.97986	1.7709	0.33965	0.62393	NaN	0.87466	1.0977	NaN	2.5344	1.0074	NaN	34542000	22035000	12506000	11917000	9110700	2805900	13493000	8747400	4745800	9132000	4177300	4954700
O43776;K7EJ19;K7EIU7;K7EPK2;K7EQ35;O43776-2	O43776	7;1;1;1;1;1	7;1;1;1;1;1	7;1;1;1;1;1	Asparagine--tRNA ligase, cytoplasmic	NARS	62.942	548	548;136;162;163;167;174	0	10.304	0.50199	0.98023	11.786	0.33705	0.56792	0.92154	0.86637	0.92542	1.0013	51.023	11.78	15.211	18304000	11485000	6818600	7703800	5635500	2068300	8049300	4559100	3490200	2551000	1290800	1260100
P31930	P31930	2	2	2	Cytochrome b-c1 complex subunit 1, mitochondrial	UQCRC1	52.645	480	480	0.0099626	1.0966	0.69914	0.98082	22.871	NaN	NaN	NaN	NaN	NaN	NaN	NaN	NaN	NaN	1609100	909830	699310	468950	335540	133410	0	0	0	1140200	574290	565900
Q9UKY7-2;Q9UKY7;D6RFH2;D6R9V8;H0Y8K3;Q9UKY7-3;D6RDN0;D6RAV0;D6R973	Q9UKY7-2;Q9UKY7;D6RFH2;D6R9V8;H0Y8K3;Q9UKY7-3;D6RDN0	5;5;4;4;4;4;3;2;1	5;5;4;4;4;4;3;2;1	5;5;4;4;4;4;3;2;1	Protein CDV3 homolog	CDV3	22.079	213	213;258;108;156;188;110;108;92;53	0	35.286	0.74069	0.98084	23.663	0.27457	0.45208	1.147	0.48992	0.73454	1.2863	71.407	2.3891	21.15	14666000	9189700	5475900	2840400	2293700	546730	5025300	3308000	1717300	6799800	3588000	3211800
P30086	P30086	9	9	9	Phosphatidylethanolamine-binding protein 1;Hippocampal cholinergic neurostimulating peptide	PEBP1	21.057	187	187	0	288.93	0.67656	0.98169	15.98	0.37703	0.5795	0.91756	0.96695	1.0124	0.97121	28.809	12.113	18.444	175240000	102940000	72300000	28934000	20687000	8247200	63287000	39795000	23492000	83019000	42458000	40561000
Q5JR95;P62241	Q5JR95;P62241	5;5	5;5	5;5	40S ribosomal protein S8	RPS8	21.879	188	188;208	0	5.3967	0.64746	0.98225	1.4457	0.33932	0.53175	0.9961	0.628	0.92762	1.078	56.114	12.67	1.4836	37048000	23290000	13758000	4471700	3390900	1080800	21977000	15212000	6765200	10600000	4687600	5912300
A0A804HIV7;Q5HY57;P50402;A0A804HLA2	A0A804HIV7;Q5HY57;P50402;A0A804HLA2	2;2;2;1	2;2;2;1	2;2;2;1	Emerin	EMD	24.383	215	215;219;254;106	0	2.4596	0.63682	0.98328	18.963	NaN	NaN	NaN	NaN	NaN	NaN	NaN	NaN	NaN	3665200	2166200	1499100	1320000	914830	405130	0	0	0	2345300	1251300	1093900
P17655;P17655-2;E7ESS6;O14815-2;O14815	P17655;P17655-2	12;10;1;1;1	12;10;1;1;1	11;9;0;0;0	Calpain-2 catalytic subunit	CAPN2	79.994	700	700;622;627;664;690	0	32.789	0.6845	0.98464	25.037	0.31215	0.58627	0.89954	0.82691	1.0115	0.95946	49.362	29.089	15.05	106760000	61711000	45051000	16901000	11674000	5227100	41953000	25273000	16680000	47909000	24764000	23144000
Q96TA1-2;Q96TA1	Q96TA1-2;Q96TA1	7;7	7;7	7;7	Niban-like protein 1	FAM129B	82.682	733	733;746	0	38.874	0.7451	0.98521	37.265	0.4441	0.77696	0.76671	0.91603	1.1943	0.83006	53.653	28.269	13.128	35764000	19313000	16451000	6672400	4409200	2263200	14955000	7530000	7424500	14138000	7374300	6763300
Q86UE4;E5RJU9;H0YBJ8	Q86UE4;E5RJU9	5;4;1	5;4;1	5;4;1	Protein LYRIC	MTDH	63.836	582	582;526;188	0	72.999	0.61625	0.98612	24.916	0.41901	0.61625	1.3213	0.91976	0.98612	1.3982	18.417	24.916	10.689	14960000	8430100	6529900	3141300	2321800	819490	5479800	3499900	1979900	6338900	2608400	3730500
E7ETK0;A0A2R8Y849;A0A2R8YD14;P62847-2;P62847-3;P62847;P62847-4;A0A2R8Y8A0	E7ETK0;A0A2R8Y849;A0A2R8YD14;P62847-2;P62847-3;P62847;P62847-4;A0A2R8Y8A0	2;2;2;2;2;2;2;1	2;2;2;2;2;2;2;1	2;2;2;2;2;2;2;1	40S ribosomal protein S24	RPS24	15.197	131	131;131;165;130;132;133;289;90	0	9.0793	0.64796	0.98647	24.993	0.35938	0.68552	NaN	0.87164	1.1772	NaN	14.864	21.536	NaN	10495000	6582000	3913100	3642400	2717800	924580	5226800	3006400	2220400	1625900	857820	768070
P15924-3;P15924;P15924-2	P15924-3;P15924;P15924-2	4;4;2	4;4;2	4;4;2	Desmoplakin	DSP	278.91	2428	2428;2871;2272	0	2.5939	0.53486	0.98666	62.047	NaN	NaN	NaN	NaN	NaN	NaN	NaN	NaN	NaN	6806200	4444800	2361400	2159500	1403000	756520	1835800	1241500	594290	2810900	1800300	1010600
P25788-2;P25788;G3V4X5;G3V3W4;G3V5N4	P25788-2;P25788;G3V4X5	4;4;2;1;1	4;4;2;1;1	4;4;2;1;1	Proteasome subunit alpha type-3	PSMA3	27.647	248	248;255;180;36;54	0	4.3125	0.4304	0.9869	41.351	0.27774	NaN	0.97849	0.62856	NaN	1.0287	63.801	NaN	2.9019	10294000	6316600	3977100	2803200	2048200	755030	1463800	918310	545490	6026700	3350100	2676500
P09972;K7EKH5;J3KSV6;J3QKP5;A8MVZ9;C9J8F3	P09972	6;2;2;2;2;1	2;2;2;2;2;1	2;2;2;2;2;1	Fructose-bisphosphate aldolase C	ALDOC	39.455	364	364;135;175;180;336;149	0	6.1387	0.55097	0.98716	19.245	0.48456	0.50354	1.0012	1.1827	0.86639	0.99972	5.9356	17.94	9.5968	57843000	33682000	24161000	8773000	6226900	2546100	23777000	14984000	8792900	25293000	12471000	12822000
O75436;S4R3Q6;O75436-2	O75436;S4R3Q6;O75436-2	4;2;2	4;2;2	3;2;2	Vacuolar protein sorting-associated protein 26A	VPS26A	38.169	327	327;226;251	0	40.877	0.70464	0.98731	6.0758	NaN	0.56449	0.87566	NaN	0.98731	0.94883	NaN	38.487	18.276	17218000	10321000	6896300	1211900	752550	459310	11358000	7299600	4058800	4647500	2269300	2378200
E5RJD2;E5RJG7;E5RFV2;Q16698-2;Q16698	E5RJD2;E5RJG7;E5RFV2;Q16698-2;Q16698	2;2;2;2;2	2;2;2;2;2	2;2;2;2;2	2,4-dienoyl-CoA reductase, mitochondrial	DECR1	15.898	151	151;181;205;326;335	0	6.6381	0.71492	0.9883	58.021	NaN	NaN	NaN	NaN	NaN	NaN	NaN	NaN	NaN	2357000	1469400	887610	535220	240710	294500	0	0	0	1821800	1228700	593100
Q99497;K7ELW0;K7EN27	Q99497;K7ELW0;K7EN27	7;6;4	7;6;4	7;6;4	Protein deglycase DJ-1	PARK7	19.891	189	189;169;160	0	163.78	0.58025	0.98847	37.872	0.38299	0.58467	0.86706	1.0002	1.0373	0.88433	57.727	31.334	7.9228	157490000	91692000	65798000	36937000	26508000	10429000	61801000	36107000	25694000	58752000	29077000	29674000
P07900;P07900-2;G3V2J8;Q58FG0;Q14568;Q58FF6	P07900;P07900-2	24;24;5;4;4;4	14;14;3;2;2;0	14;14;3;2;2;0	Heat shock protein HSP 90-alpha	HSP90AA1	84.659	732	732;854;174;334;343;505	0	323.31	0.56813	0.98891	14.077	0.40458	0.57348	1.0421	1.0818	0.92612	1.0877	9.9152	11.878	30.319	251060000	143200000	107850000	51014000	36404000	14610000	77953000	49417000	28536000	122090000	57383000	64707000
O75348;A0A7I2V2N1;A0A7I2YQH3;A0A7I2V4K4;A0A7I2V3Q6;A0A7I2V375;F2Z307;O95670-2;O95670	O75348;A0A7I2V2N1;A0A7I2YQH3;A0A7I2V4K4;A0A7I2V3Q6;A0A7I2V375;F2Z307;O95670-2;O95670	2;1;1;1;1;1;1;1;1	2;1;1;1;1;1;1;1;1	2;1;1;1;1;1;1;1;1	V-type proton ATPase subunit G 1;V-type proton ATPase subunit G 2	ATP6V1G1;ATP6V1G2-DDX39B;ATP6V1G2	13.757	118	118;37;64;71;82;98;99;78;118	0	6.0765	0.5058	0.98902	14.543	NaN	0.56429	NaN	NaN	0.94629	NaN	NaN	20.249	NaN	5973300	3993900	1979400	1053900	577860	476010	3754200	2250800	1503400	1165300	1165300	0
B1AMJ5;Q96SN8-4;Q96SN8-3;Q96SN8-2;Q96SN8	B1AMJ5;Q96SN8-4;Q96SN8-3;Q96SN8-2;Q96SN8	1;1;1;1;1	1;1;1;1;1	1;1;1;1;1	CDK5 regulatory subunit-associated protein 2	CDK5RAP2	145.59	1287	1287;1814;1852;1861;1893	0.0028149	1.4996	0.41652	0.98928	40.751	0.39456	NaN	NaN	0.98928	NaN	NaN	0	NaN	NaN	199130000	140980000	58150000	87022000	62400000	24622000	112100000	78576000	33529000	0	0	0
Q9UMX5	Q9UMX5	3	3	3	Neudesin	NENF	18.856	172	172	0	3.122	0.63101	0.98938	65.392	NaN	0.96509	NaN	NaN	1.5219	NaN	NaN	60.905	NaN	3806100	2080400	1725700	885560	666060	219500	2920600	1414300	1506200	0	0	0
A0A2R8Y7M3;A0A2R8Y5S7;P35241-4;P35241;P35241-5;P35241-2	A0A2R8Y7M3;A0A2R8Y5S7;P35241-4;P35241;P35241-5	5;5;5;5;5;2	2;2;2;2;2;2	2;2;2;2;2;2	Radixin	RDX	62.93	534	534;590;447;583;604;257	0.00079554	2.0138	0.4987	0.98944	39.216	0.48227	NaN	NaN	0.98944	NaN	NaN	40.445	NaN	NaN	4028900	2495600	1533300	2162800	1376900	785900	872750	640370	232380	993310	478310	514990
O75844	O75844	2	2	2	CAAX prenyl protease 1 homolog	ZMPSTE24	54.812	475	475	0	2.5993	0.79975	0.98996	3.9056	NaN	NaN	NaN	NaN	NaN	NaN	NaN	NaN	NaN	2520700	1383000	1137800	0	0	0	679410	391390	288010	1841300	991570	849760
G5E9S8;G3V2E7;F8W6L3;G3V3H3;G3V5R9;E7EVH7;Q07866-8;Q07866-2;Q07866-3;Q07866;Q07866-7;Q07866-5;Q07866-10;Q07866-6;Q07866-4;Q07866-9;H0YJU9;H0YJL0;H0YJT3;H0YG16	G5E9S8;G3V2E7;F8W6L3;G3V3H3;G3V5R9;E7EVH7;Q07866-8;Q07866-2;Q07866-3;Q07866;Q07866-7;Q07866-5;Q07866-10;Q07866-6;Q07866-4;Q07866-9;H0YJU9;H0YJL0;H0YJT3;H0YG16	2;2;2;2;2;2;2;2;2;2;2;2;2;2;2;2;1;1;1;1	2;2;2;2;2;2;2;2;2;2;2;2;2;2;2;2;1;1;1;1	2;2;2;2;2;2;2;2;2;2;2;2;2;2;2;2;1;1;1;1	Kinesin light chain 1	KLC1	62.506	549	549;551;576;609;630;719;551;560;564;573;584;616;618;628;637;639;131;150;161;268	0	3.9376	0.74823	0.99061	3.726	NaN	0.54863	1.0204	NaN	0.92218	1.0641	NaN	11.798	4.346	8576300	4628800	3947500	803210	630150	173070	3747200	2187600	1559500	4026000	1811000	2214900
Q14315;Q14315-2	Q14315;Q14315-2	82;81	75;74	73;72	Filamin-C	FLNC	291.02	2725	2725;2692	0	323.31	0.51368	0.991	51.208	0.3618	0.4844	1.8209	0.90259	0.82319	1.942	24.407	55.729	31.395	1488800000	875350000	613420000	250570000	180060000	70510000	674900000	453100000	221790000	563300000	242190000	321110000
P33176;A0A7I2V3V4;A0A7I2V4K6;A0A7I2V581;A0A7I2V3N5;A0A7I2V492;O60282;A0A6Q8PFV6;A0A7I2YQQ7;A0A7I2V352;A0A0G2JMZ6;J3KNA1;A0A6Q8PEZ8;A0A6Q8PGJ3;O60282-2;Q12840	P33176	14;2;2;2;2;2;2;1;1;1;1;1;1;1;1;1	14;2;2;2;2;2;2;1;1;1;1;1;1;1;1;1	14;2;2;2;2;2;2;1;1;1;1;1;1;1;1;1	Kinesin-1 heavy chain	KIF5B	109.68	963	963;699;896;933;934;956;957;132;508;509;860;943;997;1039;725;1032	0	57.817	0.66851	0.9915	20.698	0.41812	0.54581	1.1646	0.83945	0.88166	1.2434	13.068	29.014	11.07	23801000	13721000	10079000	3796100	2581000	1215100	10434000	6444700	3989500	9570500	4695700	4874800
F8W7C6;X1WI28;P27635	F8W7C6;X1WI28;P27635	3;2;2	3;2;2	3;2;2	60S ribosomal protein L10	RPL10	18.565	163	163;200;214	0	5.0575	0.54119	0.99185	9.0277	0.33942	0.54119	0.97145	0.77636	0.94225	1.0184	23.219	14.056	1.3006	35567000	21409000	14158000	7919400	6145000	1774400	11713000	6950500	4762700	15934000	8313000	7621000
Q13509;A0A0B4J269;Q13509-2;G3V5W4;G3V2R8;G3V3R4;G3V2N6;G3V3J6;G3V3W7	Q13509;A0A0B4J269;Q13509-2	15;14;12;3;3;3;3;1;1	6;5;4;2;2;2;2;1;1	3;2;1;2;2;2;2;1;1	Tubulin beta-3 chain	TUBB3	50.432	450	450;797;378;97;118;148;164;55;87	0	36.862	0.75973	0.99212	15.307	0.86396	1.0442	0.57368	2.2568	1.6784	0.60775	43.523	38.778	20.136	35151000	19698000	15453000	14498000	6926600	7571200	4543200	2422700	2120500	16110000	10349000	5761600
Q9UJU6;H0Y5J4;Q9UJU6-5	Q9UJU6;H0Y5J4;Q9UJU6-5	6;4;4	1;1;1	1;1;1	Drebrin-like protein	DBNL	48.207	430	430;359;327	0.0047814	1.3898	0.7947	0.99263	19.302	NaN	0.64184	NaN	NaN	0.98435	NaN	NaN	27.289	NaN	4012800	2131300	1881500	0	0	0	2006000	1221300	784740	2006800	910020	1096800
P62701;C9JEH7;P22090;Q8TD47	P62701	8;3;3;2	8;3;3;2	8;3;3;2	40S ribosomal protein S4, X isoform	RPS4X	29.597	263	263;262;263;263	0	13.796	0.63128	0.99332	22.194	0.36645	0.63128	0.85555	0.82371	1.0138	0.92757	36.573	26.92	11.666	42752000	26680000	16071000	12702000	9522700	3179400	18411000	11200000	7211500	11638000	5958100	5680400
P26640;A0A140T936;A0A140T954;A2ABF4;A0A0G2JJT9;A0A140T904;P26640-2	P26640;A0A140T936;A0A140T954	7;6;4;2;2;1;1	7;6;4;2;2;1;1	7;6;4;2;2;1;1	Valine--tRNA ligase	VARS	140.47	1264	1264;1183;366;174;174;95;297	0	9.701	0.47279	0.99408	18.909	0.41361	0.52944	NaN	0.88677	0.97309	NaN	13.851	26.476	NaN	6381300	4103700	2277700	2292600	1535200	757400	4088800	2568500	1520300	0	0	0
O75083;O75083-3;D6RD66	O75083;O75083-3	19;14;8	19;14;8	19;14;8	WD repeat-containing protein 1	WDR1	66.193	606	606;466;245	0	116.51	0.57167	0.9946	34.964	0.33291	0.52408	1.7041	0.87886	0.84124	1.8319	31.706	32.178	19.497	246850000	130580000	116270000	43426000	32582000	10844000	77473000	49197000	28275000	125950000	48804000	77146000
P40261	P40261	5	5	5	Nicotinamide N-methyltransferase	NNMT	29.574	264	264	0	28.388	0.64645	0.99484	28.312	0.64045	0.3932	1.0498	1.7056	0.66768	1.0802	19.375	4.5488	29.548	155280000	93301000	61978000	32517000	19168000	13348000	56854000	40236000	16618000	65908000	33897000	32011000
P20618	P20618	4	4	4	Proteasome subunit beta type-1	PSMB1	26.489	241	241	0	6.7014	0.62051	0.99491	53.481	0.51351	0.56685	1.3429	1.3592	0.91357	1.4692	82.16	56.659	53.363	21220000	11590000	9630000	4533600	2763900	1769700	9040800	5054500	3986300	7645600	3771600	3874000
E5RI60;A0A7I2V5J1;A0A7I2YQL5;Q9UHI8	E5RI60;A0A7I2V5J1;A0A7I2YQL5;Q9UHI8	3;3;3;3	3;3;3;3	3;3;3;3	A disintegrin and metalloproteinase with thrombospondin motifs 1	ADAMTS1	77.432	705	705;729;911;967	0	5.9789	0.81809	0.99595	63.801	NaN	0.52119	NaN	NaN	0.70704	NaN	NaN	48.453	NaN	2028300	1233000	795260	766710	351480	415230	1261600	881550	380040	0	0	0
O95302;O95302-3	O95302;O95302-3	5;5	5;5	5;5	Peptidyl-prolyl cis-trans isomerase FKBP9	FKBP9	63.083	570	570;623	0	7.7759	0.68794	0.99612	40.752	0.23913	1.0824	1.0671	0.55665	1.7644	1.1379	15.518	24.284	6.6948	27743000	17039000	10704000	13653000	10572000	3080300	8906900	3891600	5015300	5183400	2575400	2608100
P68371;M0R2D3;M0QY85;M0QZL7;M0R278;M0R0X0;M0QY37;M0QX14;M0R042;M0QYM7;M0R2T4;A0A075B724	P68371	17;4;3;3;3;2;2;2;2;2;1;1	17;4;3;3;3;2;2;2;2;2;1;1	1;0;0;0;0;0;0;0;0;0;0;0	Tubulin beta-4B chain	TUBB4B	49.83	445	445;155;107;157;167;103;109;110;144;160;104;119	0	323.31	0.57778	0.99625	74.437	0.30975	0.54993	1.0702	0.77881	0.99211	1.072	33.101	96.144	22.734	710080000	432300000	277780000	110730000	87328000	23405000	255140000	182100000	73038000	344210000	162870000	181340000
O75367-2;O75367-3;O75367;D6RCF2	O75367-2;O75367-3;O75367;D6RCF2	2;2;2;1	2;2;2;1	2;2;2;1	Core histone macro-H2A.1;Histone H2A	H2AFY	39.183	369	369;371;372;165	0	11.998	0.52291	0.99664	64.46	0.5872	NaN	NaN	1.1548	NaN	NaN	20.834	NaN	NaN	2536600	1694600	842090	1719900	1083700	636160	816750	610820	205930	0	0	0
C9JXB8;C9JNW5;P83731	C9JXB8;C9JNW5;P83731	4;4;4	4;4;4	4;4;4	60S ribosomal protein L24	RPL24	14.369	121	121;150;157	0	58.458	0.59712	0.99762	27.556	0.44533	0.518	NaN	1.1057	0.89669	NaN	27.585	17.007	NaN	139180000	121880000	17299000	5348000	3637600	1710500	12038000	7555000	4483200	121790000	110680000	11105000
Q5T9B7;P00568;H0YID2;Q9Y6K8-2;Q9Y6K8-3;Q9Y6K8	Q5T9B7;P00568	6;6;2;1;1;1	6;6;2;1;1;1	6;6;2;1;1;1	Adenylate kinase isoenzyme 1	AK1	23.411	210	210;194;51;197;536;562	0	19.808	0.53722	0.99762	12.856	0.50314	0.57408	0.5089	1.319	0.99762	0.54397	9.0349	6.1122	5.6879	76415000	47862000	28554000	16703000	9927700	6775600	23838000	14061000	9777400	35874000	23873000	12000000
E7ESV4;F5H7Y6;P61224-3;P61224;A6NIZ1;F5H823;B7ZB78;F5GZG1;F5GX62;P61224-4;F5H6R7;F5H004;P61224-2;P62834;F5H4H0;F5GYH7;F5H077;F5GWU8;F5H491;F5H0B7;F5H500;A0A075B6Q0;F5GYB5	E7ESV4;F5H7Y6;P61224-3;P61224;A6NIZ1;F5H823;B7ZB78;F5GZG1;F5GX62;P61224-4;F5H6R7;F5H004;P61224-2	5;5;5;5;5;4;4;4;4;4;3;3;3;2;1;1;1;1;1;1;1;1;1	5;5;5;5;5;4;4;4;4;4;3;3;3;2;1;1;1;1;1;1;1;1;1	5;5;5;5;5;4;4;4;4;4;3;3;3;2;1;1;1;1;1;1;1;1;1	Ras-related protein Rap-1b;Ras-related protein Rap-1b-like protein	RAP1B	17.682	157	157;179;165;184;184;103;118;121;139;142;122;127;137;184;48;53;84;87;93;98;101;129;136	0	11.305	0.60116	0.99788	36.316	0.26052	0.59435	0.9149	0.59898	1.0449	0.95358	34.075	29.125	38.552	54887000	35366000	19521000	16129000	12569000	3560600	26088000	16664000	9424300	12670000	6133800	6536100
P23396;P23396-2;E9PPU1;E9PL09;F2Z2S8;H0YCJ7;E9PQ96;E9PJH4;H0YF32;E9PK82;H0YEU2;E9PSF4;E9PQX2;H0YES8;E9PJN9	P23396;P23396-2;E9PPU1;E9PL09;F2Z2S8;H0YCJ7;E9PQ96;E9PJH4;H0YF32;E9PK82;H0YEU2	13;12;11;11;9;8;7;7;7;7;7;4;3;1;1	13;12;11;11;9;8;7;7;7;7;7;4;3;1;1	13;12;11;11;9;8;7;7;7;7;7;4;3;1;1	40S ribosomal protein S3	RPS3	26.688	243	243;259;158;231;117;135;91;115;123;128;171;103;44;33;36	0	31.128	0.58929	0.99856	7.8911	0.39778	0.58681	0.89227	1.0239	1.0141	0.99262	9.4523	16.792	14.288	176090000	105210000	70875000	49219000	32617000	16602000	38662000	24351000	14311000	88206000	48244000	39962000
P11142;E9PKE3;E9PNE6;P11142-2;E9PN89;A8K7Q2;E9PLF4;E9PQQ4;E9PQK7;E9PPY6;E9PI65;E9PN25;E9PM13;E9PS65	P11142;E9PKE3;E9PNE6;P11142-2;E9PN89;A8K7Q2	24;23;17;17;13;13;10;9;9;7;7;6;6;6	24;23;17;17;13;13;10;9;9;7;7;6;6;6	10;10;9;4;3;10;0;0;0;0;0;0;5;5	Heat shock cognate 71 kDa protein	HSPA8	70.897	646	646;627;500;493;312;410;187;171;178;137;168;132;150;223	0	286.16	0.65094	0.99867	17.636	0.36724	0.68434	1.093	0.94935	1.2108	1.1228	25.979	19.4	17.551	745920000	458640000	287280000	263520000	193640000	69882000	269790000	161230000	108560000	212620000	103770000	108850000
P02461;P02461-2	P02461;P02461-2	4;3	4;3	2;1	Collagen alpha-1(III) chain	COL3A1	138.56	1466	1466;1163	0	6.0032	0.53846	0.99895	13.283	0.53846	NaN	NaN	0.99895	NaN	NaN	13.283	NaN	NaN	1358700	956010	402710	1358700	956010	402710	0	0	0	0	0	0
A0A1B0GWF2;A0A1B0GVQ5;A0A2R8Y5D4;A0A0D9SG72;A0A1B0GTP9;P61764;P61764-2;A0A1B0GW76	A0A1B0GWF2;A0A1B0GVQ5;A0A2R8Y5D4;A0A0D9SG72;A0A1B0GTP9;P61764;P61764-2;A0A1B0GW76	2;2;2;2;2;2;2;1	2;2;2;2;2;2;2;1	2;2;2;2;2;2;2;1	Syntaxin-binding protein 1	STXBP1	65.215	574	574;577;580;580;589;594;603;360	0	4.17	0.75398	0.99949	52.154	NaN	0.75398	NaN	NaN	0.99949	NaN	NaN	52.154	NaN	699460	469110	230360	0	0	0	699460	469110	230360	0	0	0
P62873;P62873-2;B1AKQ8;F6UT28;F6X3N5;B3KVK2;F5H8J8;F5H100;F5H0S8;E9PCP0;P16520-2;P16520;A0A6Q8PF84;F5GZN8	P62873;P62873-2;B1AKQ8;F6UT28	9;8;5;5;4;4;2;2;2;2;2;2;1;1	9;8;5;5;4;4;2;2;2;2;2;2;1;1	4;4;2;2;1;2;1;1;1;1;1;1;1;1	Guanine nucleotide-binding protein G(I)/G(S)/G(T) subunit beta-1	GNB1	37.377	340	340;332;107;165;163;240;232;232;264;339;297;340;35;36	0	253.21	0.57997	1.0002	30.006	0.2862	0.43602	1.1548	0.75968	0.74896	1.2285	46.81	23.31	15.539	107260000	60803000	46456000	11679000	8578000	3101300	46045000	30537000	15508000	49534000	21687000	27847000
P62906	P62906	4	4	4	60S ribosomal protein L10a	RPL10A	24.831	217	217	0	6.618	0.59138	1.0006	8.3162	0.38914	0.59138	0.80475	1.0291	1.0006	0.87817	33.879	6.1726	1.8222	34627000	22018000	12609000	12651000	9349500	3301600	10122000	6026300	4095800	11854000	6642100	5211400
F2Z2Y8;Q9H0E2;E9PNS3;E7EN89;Q9H0E2-2	F2Z2Y8;Q9H0E2;E9PNS3;E7EN89;Q9H0E2-2	2;2;1;1;1	2;2;1;1;1	2;2;1;1;1	Toll-interacting protein	TOLLIP	23.28	213	213;274;80;246;205	0	2.3896	0.67399	1.0008	35.889	NaN	0.47098	1.2866	NaN	0.65579	1.3616	NaN	28.108	27.439	3376900	1886800	1490100	436820	276060	160750	1421700	918740	503000	1518400	692010	826370
H3BRL8;H3BPZ1;H3BS72;Q9P035-2;Q9P035;H3BMZ1	H3BRL8;H3BPZ1;H3BS72;Q9P035-2;Q9P035;H3BMZ1	2;2;2;2;2;1	2;2;2;2;2;1	2;2;2;2;2;1	Very-long-chain (3R)-3-hydroxyacyl-CoA dehydratase 3	HACD3	29.205	245	245;337;400;307;362;139	0	3.4619	0.79346	1.0023	1.5954	NaN	0.5909	1.0655	NaN	0.9163	1.0963	NaN	14.624	11.433	6886300	4053000	2833400	1267300	944270	323040	2735600	1631100	1104500	2883400	1477600	1405900
O43396;K7EML9;K7ER96;K7EKG2;K7EPB7	O43396;K7EML9;K7ER96	4;3;3;1;1	4;3;3;1;1	4;3;3;1;1	Thioredoxin-like protein 1	TXNL1	32.251	289	289;138;281;27;69	0	8.0963	0.63898	1.0024	8.734	NaN	0.63898	NaN	NaN	1.0945	NaN	NaN	6.7049	NaN	6738100	3649200	3088900	1203900	768740	435160	5534200	2880500	2653700	0	0	0
O00299	O00299	9	9	9	Chloride intracellular channel protein 1	CLIC1	26.922	241	241	0	102.2	0.69049	1.0027	8.1736	0.30587	0.66415	0.91746	0.81503	1.1637	0.92742	25.318	17	9.996	198860000	116340000	82512000	35463000	26781000	8682300	63298000	37581000	25717000	100090000	51982000	48113000
Q14847;Q14847-2;C9J9W2;Q14847-3;F6S2S5;J3KSN1;K7ESD6	Q14847;Q14847-2;C9J9W2;Q14847-3	9;8;7;6;2;2;1	9;8;7;6;2;2;1	9;8;7;6;2;2;1	LIM and SH3 domain protein 1	LASP1	29.717	261	261;323;166;205;91;105;71	0	148.22	0.565	1.0027	29.948	0.23501	0.55648	1.3204	0.6405	0.97475	1.2834	16.268	8.4985	19.133	240150000	136780000	103360000	45241000	36467000	8773600	78387000	51127000	27260000	116520000	49190000	67329000
D6RGI3;D6RER5;Q9NVA2;Q9NVA2-2;D6RDU5;D6RDP1;D6R9Y6;H0Y961;H0Y9G8;A0A087X142;A6NMH6;A6NFQ9;F8W8I8;Q92599-3;Q92599-2;Q92599-4;Q92599;C9JV02;E7EW69;E7EX04;B5ME97;Q9P0V9-3;Q9P0V9;Q9P0V9-2	D6RGI3;D6RER5;Q9NVA2;Q9NVA2-2;D6RDU5	8;8;8;8;6;3;3;3;2;2;2;2;2;2;2;2;2;1;1;1;1;1;1;1	8;8;8;8;6;3;3;3;2;2;2;2;2;2;2;2;2;1;1;1;1;1;1;1	5;5;5;5;3;2;2;2;2;1;1;1;1;1;1;1;1;0;1;1;1;1;1;1	Septin-11	2022-09-11	49.005	425	425;432;429;439;372;126;136;160;82;426;430;440;460;369;429;442;483;130;450;473;544;431;454;503	0	57.67	0.58372	1.0028	19.182	0.31081	0.58245	0.99639	0.84735	1.0034	1.0626	14.309	23.246	12.179	81319000	48681000	32637000	22048000	15303000	6744700	36627000	22242000	14385000	22643000	11136000	11508000
P09496-2;F8WF69;P09496-5;P09496-4;P09496-3;P09496;C9J8P9	P09496-2;F8WF69;P09496-5;P09496-4;P09496-3;P09496	3;2;2;2;2;2;1	3;2;2;2;2;2;1	3;2;2;2;2;2;1	Clathrin light chain A	CLTA	23.662	218	218;260;166;230;236;248;196	0	4.4683	0.60139	1.0043	11.323	0.35281	0.5821	NaN	0.92326	0.95861	NaN	17.181	9.9226	NaN	12564000	7936600	4627500	5190800	3862400	1328400	4932100	3229700	1702300	2441300	844470	1596800
E9PL38;J3KNQ3;A0A087WUL9;Q9UNM6;Q9UNM6-2;H0YD73;E9PQG3	E9PL38;J3KNQ3;A0A087WUL9;Q9UNM6;Q9UNM6-2;H0YD73	4;4;4;4;4;3;1	4;4;4;4;4;3;1	4;4;4;4;4;3;1	26S proteasome non-ATPase regulatory subunit 13	PSMD13	29.755	263	263;349;377;376;378;221;113	0	2.5338	0.90329	1.0047	39.126	NaN	NaN	1.1957	NaN	NaN	1.3252	NaN	NaN	39.154	4868100	2668100	2200000	491790	378670	113130	881300	566620	314690	3495000	1722900	1772200
E9PK54	E9PK54	10	1	1		HSPA8	19.955	183	183	0.002201	1.6586	0.57641	1.0047	85.298	NaN	NaN	NaN	NaN	NaN	NaN	NaN	NaN	NaN	22473000	12938000	9534300	6480100	4682900	1797200	6616000	2125700	4490300	9376500	6129800	3246800
B7Z8W6;A0A7P0Z466;A0A7P0TA73;A0A7P0T941;A0A7P0TBB7;A0A0C4DFS8;A0A7P0T8D2;A0A7P0T862;A0A7P0T931;A0A7P0TAS5;A0A7P0T973;A0A7P0T8L3;A0A7P0T9I9;A0A7P0T895;P43490	B7Z8W6;A0A7P0Z466;A0A7P0TA73;A0A7P0T941;A0A7P0TBB7;A0A0C4DFS8;A0A7P0T8D2;A0A7P0T862;A0A7P0T931;A0A7P0TAS5;A0A7P0T973;A0A7P0T8L3;A0A7P0T9I9;A0A7P0T895;P43490	1;1;1;1;1;1;1;1;1;1;1;1;1;1;1	1;1;1;1;1;1;1;1;1;1;1;1;1;1;1	1;1;1;1;1;1;1;1;1;1;1;1;1;1;1	Nicotinamide phosphoribosyltransferase	NAMPT	26.807	241	241;252;253;253;283;368;375;404;425;426;444;464;488;490;491	0.0029028	1.6126	0.81789	1.0052	25.596	NaN	NaN	NaN	NaN	NaN	NaN	NaN	NaN	NaN	1547400	819550	727890	0	0	0	836710	550770	285930	710740	268780	441960
K7EIG7;J3QRN6;O94832;J3KRL0;F8WEW9;A0A3B3IU30;B0I1T2-2;B0I1T2-3;B0I1T2-4;B0I1T2	K7EIG7;J3QRN6;O94832	6;6;6;2;1;1;1;1;1;1	6;6;6;2;1;1;1;1;1;1	6;6;6;2;1;1;1;1;1;1	Unconventional myosin-Id	MYO1D	106.01	918	918;961;1006;436;210;967;230;525;722;1018	0	5.8312	0.57416	1.0059	28.257	NaN	0.57416	NaN	NaN	1.0059	NaN	NaN	28.257	NaN	7104300	4477400	2626800	0	0	0	7104300	4477400	2626800	0	0	0
P62829;C9JD32;B9ZVP7;J3KT29;J3KTJ3	P62829;C9JD32;B9ZVP7;J3KT29	3;2;2;2;1	3;2;2;2;1	3;2;2;2;1	60S ribosomal protein L23	RPL23	14.865	140	140;91;114;122;81	0	5.8331	0.62687	1.0061	5.1928	0.32233	0.54723	0.90491	1.1892	0.95104	0.96696	50.808	24.713	10.824	46049000	27589000	18460000	11562000	8074000	3487900	12927000	8155500	4771200	21561000	11360000	10201000
Q9UBW8	Q9UBW8	1	1	1	COP9 signalosome complex subunit 7a	COPS7A	30.276	275	275	0	3.2776	0.65171	1.0061	34.492	NaN	0.65171	NaN	NaN	1.0061	NaN	NaN	34.492	NaN	2316200	1388100	928180	0	0	0	2316200	1388100	928180	0	0	0
A0A804HI24;P07954-2;P07954	A0A804HI24;P07954-2;P07954	4;4;4	4;4;4	4;4;4	Fumarate hydratase, mitochondrial	FH	51.342	480	480;467;510	0	6.7376	0.62458	1.0065	5.6775	0.49695	0.65055	0.93599	0.90644	1.0065	1.0101	8.1513	34.568	25.366	9461600	5525400	3936100	2878100	1961400	916690	2534100	1448500	1085600	4049400	2115600	1933900
S4R371;P05413;S4R3A2	S4R371;P05413;S4R3A2	3;3;2	3;3;2	3;3;2	Fatty acid-binding protein, heart	FABP3	14.787	132	132;133;89	0	2.4468	0.71329	1.0065	47.476	NaN	0.6059	NaN	NaN	1.0761	NaN	NaN	52.703	NaN	26404000	14373000	12031000	0	0	0	20153000	11323000	8830000	6250200	3049500	3200700
CON__P02777	CON__P02777	1	1	1			24.241	230	230	0	2.6188	1.0401	1.0068	89.398	NaN	NaN	NaN	NaN	NaN	NaN	NaN	NaN	NaN	39955000	18739000	21216000	7317500	5704000	1613600	8553800	2730900	5822900	24084000	10305000	13779000
Q96HC4;Q96HC4-7;Q96HC4-4;Q96HC4-6;H0Y8Y3;A0A0A0MSP3;Q96HC4-3;Q96HC4-2;A0A0D9SFR4;H0YBI4;H0Y929	Q96HC4;Q96HC4-7;Q96HC4-4;Q96HC4-6;H0Y8Y3	11;9;9;8;6;4;3;3;2;2;1	11;9;9;8;6;4;3;3;2;2;1	11;9;9;8;6;4;3;3;2;2;1	PDZ and LIM domain protein 5	PDLIM5	63.944	596	596;483;487;625;231;271;214;234;176;196;85	0	67.307	0.58863	1.0079	21.623	0.28811	0.50654	1.4539	0.63532	0.82649	1.5436	17.66	14.59	19.335	81289000	48889000	32400000	22155000	16108000	6047100	32773000	21011000	11762000	26361000	11770000	14590000
A0A7I2V4Y9;A0A7I2V4H4;Q13561;Q13561-3;Q13561-2;A8K8J9;H0YI98;F8W1I6;H0YHL1;F8VW18;A0A7I2V390;F8VRV7	A0A7I2V4Y9;A0A7I2V4H4;Q13561;Q13561-3;Q13561-2;A8K8J9;H0YI98;F8W1I6	6;6;6;6;6;5;4;4;2;2;2;1	6;6;6;6;6;5;4;4;2;2;2;1	6;6;6;6;6;5;4;4;2;2;2;1	Dynactin subunit 2	DCTN2	41.622	378	378;379;401;403;406;314;268;315;128;278;296;152	0	34.527	0.62412	1.0081	17.106	0.47166	0.62412	1.1989	0.87083	1.0081	1.2882	23.713	17.106	23.542	22708000	12449000	10259000	4116600	2868800	1247800	8576000	4580200	3995800	10015000	4999800	5015600
Q9UK76-3;Q9UK76	Q9UK76-3;Q9UK76	1;1	1;1	1;1	Hematological and neurological expressed 1 protein;Hematological and neurological expressed 1 protein, N-terminally processed	HN1	11.023	108	108;154	0.002805	1.4841	0.73702	1.0088	43.548	NaN	0.73702	NaN	NaN	1.0088	NaN	NaN	8.3923	NaN	3662400	1727900	1934500	879500	748080	131420	1229300	640140	589170	1553600	339690	1213900
Q9NZB2-4;Q9NZB2;Q9NZB2-6;A0A0C4DG79;A0A494C0Y9;A0A0C4DH52;Q9NZB2-2;Q9NZB2-5	Q9NZB2-4;Q9NZB2;Q9NZB2-6;A0A0C4DG79	3;3;3;2;1;1;1;1	3;3;3;2;1;1;1;1	3;3;3;2;1;1;1;1	Constitutive coactivator of PPAR-gamma-like protein 1	FAM120A	117.4	1072	1072;1118;1146;494;280;495;628;651	0	14.517	0.76648	1.0095	42.004	0.73293	0.59745	0.87619	1.5367	0.85992	0.89658	45.077	50.888	2.4158	49109000	26749000	22360000	11663000	6281800	5381500	13996000	8271700	5723900	23450000	12195000	11254000
Q6AWB1;E7EX90;A0A7P0Z4C3;A0A804CDA6;Q14203-5;Q14203-2;Q14203-3;Q14203-4;Q14203-6;Q14203	Q6AWB1;E7EX90;A0A7P0Z4C3;A0A804CDA6;Q14203-5;Q14203-2;Q14203-3;Q14203-4;Q14203-6;Q14203	5;5;5;5;5;5;5;5;5;5	5;5;5;5;5;5;5;5;5;5	5;5;5;5;5;5;5;5;5;5	Dynactin subunit 1	DKFZp686E0752;DCTN1	98.517	890	890;1256;1261;1273;1139;1144;1236;1253;1271;1278	0	9.7807	0.65485	1.0097	31.492	NaN	0.572	1.4721	NaN	0.91033	1.5596	NaN	19.51	17.225	5349000	3032100	2316900	521320	360950	160370	2794200	1722200	1072000	2033500	948970	1084600
P09382;F8WEI7	P09382	9;3	9;3	9;3	Galectin-1	LGALS1	14.716	135	135;38	0	134.9	0.71839	1.0098	35.339	0.28687	0.52067	1.5019	0.73225	0.94194	1.5654	55.18	55.494	23.474	880100000	498290000	381800000	238370000	180720000	57648000	232910000	152040000	80875000	408810000	165530000	243280000
A0A804HJI0;A0A804HIQ7;A0A804HI40;A0A804HJZ1;A0A804HI14;A0A804HIG4;A0A804HKR3;A0A804HKJ0;A0A804HL40;A0A804HK30;A0A804HIN4;A0A804HKI2;P42704;A0A804HHY9;A0A804HLG8;A0A804HJH8;A0A804HLK8;A0A804HKX6;A0A804HKK7;A0A804HJA1;A0A804HIV5;A0A804HK02;C9JCA9;B8ZZ38	A0A804HJI0;A0A804HIQ7;A0A804HI40;A0A804HJZ1;A0A804HI14;A0A804HIG4;A0A804HKR3;A0A804HKJ0;A0A804HL40;A0A804HK30;A0A804HIN4;A0A804HKI2;P42704;A0A804HHY9;A0A804HLG8;A0A804HJH8	4;4;4;4;4;4;4;4;4;4;4;4;4;3;3;2;1;1;1;1;1;1;1;1	4;4;4;4;4;4;4;4;4;4;4;4;4;3;3;2;1;1;1;1;1;1;1;1	4;4;4;4;4;4;4;4;4;4;4;4;4;3;3;2;1;1;1;1;1;1;1;1	Leucine-rich PPR motif-containing protein, mitochondrial	LRPPRC	88.609	776	776;1277;1356;1363;1366;1369;1379;1391;1393;1395;1404;1430;1394;1285;1400;913;115;141;266;281;739;795;837;841	0	4.5816	0.77037	1.0104	42.569	0.47368	0.90678	1.6519	1.0104	1.2271	1.4615	38.173	78.949	41.004	442170000	224160000	218010000	79937000	55968000	23969000	154900000	93918000	60978000	207340000	74272000	133070000
U3KQ84;A0A0C4DGS1;P39656;P39656-3;P39656-2	U3KQ84;A0A0C4DGS1;P39656;P39656-3;P39656-2	5;5;5;4;3	5;5;5;4;3	5;5;5;4;3	Dolichyl-diphosphooligosaccharide--protein glycosyltransferase 48 kDa subunit	DDOST	17.105	154	154;439;456;438;419	0	16.774	0.6417	1.0116	16.68	0.40727	0.67282	1.0336	0.89359	1.137	1.1232	17.379	1.9875	11.323	29057000	16270000	12787000	7763800	5469000	2294800	9740000	5749700	3990200	11553000	5051400	6502100
O14818;O14818-2;H0Y586;A0A087WYS6;Q8TAA3-2;Q8TAA3-5;Q8TAA3;O14818-4	O14818;O14818-2;H0Y586;A0A087WYS6;Q8TAA3-2;Q8TAA3-5;Q8TAA3	5;4;3;3;3;3;3;2	5;4;3;3;3;3;3;2	5;4;3;3;3;3;3;2	Proteasome subunit alpha type-7;Proteasome subunit alpha type-7-like	PSMA7;PSMA8	27.887	248	248;178;187;224;212;250;256;149	0	91.075	0.65109	1.0119	9.8058	0.33639	0.51546	1.0234	0.91176	0.83077	1.0826	14.401	55.378	29.213	39133000	24105000	15027000	10901000	7673900	3227400	10932000	7076000	3855600	17300000	9355500	7944300
P50395;P50395-2;Q5SX87;Q5SX91;V9GYJ7;V9GYF8;Q5SX90;Q5SX86	P50395;P50395-2	16;15;6;5;4;4;4;4	16;15;6;5;4;4;4;4	12;12;4;3;2;2;2;2	Rab GDP dissociation inhibitor beta	GDI2	50.663	445	445;400;263;203;125;130;148;155	0	323.31	0.6773	1.0119	14.765	0.39957	0.66091	0.90116	1.0996	1.1343	0.9523	31.219	18.52	12.623	130380000	74021000	56361000	21391000	14968000	6423400	41356000	24715000	16640000	67636000	34338000	33297000
P51148;P51148-2;K7ERI8;K7ERQ8;F8VWU4;F8VVZ0;F8VUA5;F8VVK3;K7ENY4;P20339-2;P20339;K7EIP6;F8WCY6;F8WD79;F8VPW9;F8VSF8;F8VWZ7	P51148;P51148-2;K7ERI8;K7ERQ8	6;6;3;3;2;2;2;2;2;2;2;1;1;1;1;1;1	6;6;3;3;2;2;2;2;2;2;2;1;1;1;1;1;1	4;4;1;1;0;0;0;0;1;0;0;1;0;0;0;0;0	Ras-related protein Rab-5C	RAB5C	23.482	216	216;249;161;282;91;100;115;124;150;201;215;27;62;65;73;74;79	0	112.74	0.59254	1.0124	19.095	0.35607	0.58875	1.0124	0.75232	0.98533	1.0914	36.552	36.22	47.324	37452000	20441000	17011000	7470700	5231100	2239600	12008000	6895500	5112800	17973000	8314400	9659000
Q96AG4;I3L223	Q96AG4	7;1	7;1	7;1	Leucine-rich repeat-containing protein 59	LRRC59	34.93	307	307;62	0	20.899	0.60495	1.0124	24.267	0.40483	0.59491	1.4047	0.87269	1.0124	1.5113	32.964	12.954	8.2103	37264000	21262000	16003000	7070200	5065300	2005000	17008000	10428000	6580100	13186000	5768600	7417800
P17066;P48741	P17066;P48741	7;5	1;1	1;1	Heat shock 70 kDa protein 6;Putative heat shock 70 kDa protein 7	HSPA6;HSPA7	71.027	643	643;367	0.0083925	1.1959	0.4628	1.0127	35.991	NaN	NaN	NaN	NaN	NaN	NaN	NaN	NaN	NaN	56297000	37413000	18884000	27869000	20704000	7165500	28428000	16709000	11718000	0	0	0
P52209-2;P52209;K7EM49;K7EPF6;K7EMN2;K7ELN9	P52209-2;P52209;K7EM49;K7EPF6	10;10;5;5;4;1	10;10;5;5;4;1	10;10;5;5;4;1	6-phosphogluconate dehydrogenase, decarboxylating	PGD	51.872	470	470;483;205;256;160;224	0	18.481	0.59019	1.0136	50.58	0.56045	0.86874	0.52289	1.3676	1.415	0.55359	49.218	31.144	9.2953	65706000	39107000	26599000	10731000	6114200	4617200	16027000	8665000	7362200	38948000	24328000	14620000
H0YFA4;P52943;P52943-2;H0YHD8	H0YFA4;P52943;P52943-2	3;3;3;1	3;3;3;1	3;3;3;1	Cysteine-rich protein 2	CRIP2	20.6	192	192;208;282;104	0	20.969	0.51218	1.0138	22.462	NaN	0.62507	NaN	NaN	0.91815	NaN	NaN	30.719	NaN	2765600	1943700	821890	1079300	670250	409070	1686200	1273400	412820	0	0	0
P24844;P24844-2	P24844;P24844-2	8;5	2;2	2;2	Myosin regulatory light polypeptide 9	MYL9	19.827	172	172;118	0.0015221	1.8007	0.57975	1.0141	12.36	NaN	0.57975	NaN	NaN	1.0141	NaN	NaN	12.36	NaN	7886000	4410400	3475600	0	0	0	7886000	4410400	3475600	0	0	0
A0A0A0MTH3;Q13418-3;Q13418-2;Q13418	A0A0A0MTH3;Q13418-3;Q13418-2;Q13418	4;4;4;4	4;4;4;4	4;4;4;4	Integrin-linked protein kinase	ILK	54.611	483	483;318;391;452	0	6.8893	0.65186	1.0149	8.9177	0.43081	0.54281	1.1763	0.87687	0.8813	1.2456	20.668	6.5206	25.681	9831800	5703800	4128000	2137100	1538500	598640	3991800	2619200	1372600	3702900	1546200	2156700
P62854	P62854	1	1	1	40S ribosomal protein S26	RPS26	13.015	115	115	0	62.862	0.58593	1.0152	30.847	NaN	NaN	1.062	NaN	NaN	1.1396	NaN	NaN	19.455	14263000	8240600	6022900	2207100	1548200	658980	4366200	3129500	1236700	7690100	3562900	4127200
Q9BUF5;K7ESM5;K7ESQ3;K7EQT3;K7EJ64;K7ERA8;K7EJZ4;K7EL29;K7EN98;K7EPE5	Q9BUF5;K7ESM5	14;11;3;3;3;3;3;3;3;3	5;2;3;3;3;3;3;3;3;3	5;2;3;3;3;3;3;3;3;3	Tubulin beta-6 chain	TUBB6	49.857	446	446;338;96;104;104;110;115;130;136;141	0	23.012	0.69145	1.0166	18.038	0.26512	0.54218	1.1169	0.50538	0.89324	1.1995	34.704	32.123	15.514	49510000	30453000	19057000	9213900	6882700	2331100	20316000	13931000	6385000	19980000	9639300	10341000
P26373;P26373-2;J3KS98;J3QSB4	P26373;P26373-2	3;2;1;1	3;2;1;1	3;2;1;1	60S ribosomal protein L13	RPL13	24.261	211	211;164;78;126	0	4.1865	0.47962	1.0172	5.3798	0.33759	0.58626	NaN	0.90184	1.0257	NaN	12.944	3.9917	NaN	36620000	23026000	13594000	12198000	8946600	3251200	15537000	9252500	6284100	8885500	4827200	4058300
Q93052;A0A087WZF1;C9JUT4;C9JXK9;C9J5C8;C9J4E3;C9J2R5;C9JIY7;C9JT42;C9J3U9;C9J1K7;C9JE51	Q93052;A0A087WZF1;C9JUT4	12;11;9;5;4;4;3;3;3;3;3;2	12;11;9;5;4;4;3;3;3;3;3;2	12;11;9;5;4;4;3;3;3;3;3;2	Lipoma-preferred partner	LPP	65.746	612	612;590;428;252;111;151;52;57;65;66;93;46	0	41.859	0.53404	1.0174	35.199	0.46212	0.41648	1.0556	1.0046	0.69572	1.1447	55.126	47.998	53.507	19608000	11848000	7760600	8942600	5695100	3247500	3846900	2699400	1147500	6818900	3453300	3365600
P31947-2;P31947	P31947-2;P31947	4;4	1;1	1;1	14-3-3 protein sigma	SFN	24.336	216	216;248	0.0047782	1.386	0.97058	1.018	5.7053	NaN	NaN	NaN	NaN	NaN	NaN	NaN	NaN	NaN	126760000	72787000	53972000	23372000	16790000	6581900	31945000	20903000	11043000	71441000	35094000	36347000
Q16658	Q16658	4	4	4	Fascin	FSCN1	54.529	493	493	0	8.6569	0.60897	1.0182	23.852	0.37576	0.49425	1.1601	1.024	0.82351	1.2563	0.44553	41.67	11.666	33094000	19875000	13218000	7240500	5339900	1900500	15015000	9251600	5763000	10839000	5283900	5554900
E7EX73;E9PGM1;E7EUU4;A0A7I2Y1C3;Q04637-5;Q04637-4;Q04637-3;Q04637;Q04637-8;Q04637-9;Q04637-6;Q04637-7;C9J6B6;C9JF13;C9J2Z7;C9K073;H7C0V6;H7C044;F8WCF2;C9JHW9;A0A6Q8PFB2	E7EX73;E9PGM1;E7EUU4;A0A7I2Y1C3;Q04637-5;Q04637-4;Q04637-3;Q04637;Q04637-8;Q04637-9;Q04637-6;Q04637-7;C9J6B6;C9JF13	8;8;8;8;8;8;8;8;8;8;7;7;4;4;3;3;2;2;1;1;1	8;8;8;8;8;8;8;8;8;8;7;7;4;4;3;3;2;2;1;1;1	8;8;8;8;8;8;8;8;8;8;7;7;4;4;3;3;2;2;1;1;1	Eukaryotic translation initiation factor 4 gamma 1	EIF4G1	158.64	1436	1436;1513;1560;1577;1435;1512;1559;1599;1600;1606;1403;1404;757;903;833;869;180;226;50;160;525	0	24.477	0.81434	1.0186	18.428	0.40739	0.65779	1.0082	0.77636	1.0319	1.0959	18.388	24.711	14.286	17309000	9791300	7517400	2426700	1735200	691460	8535400	5181400	3354000	6346700	2874700	3471900
O75369-2;O75369-9;O75369;O75369-8;A0A804HK76;O75369-6;O75369-3;E7EN95;O75369-7;A0A804HL72;O75369-5;O75369-4;A0A804HJC2;H7C5L4;A0A0C4DGA1	O75369-2;O75369-9;O75369;O75369-8;A0A804HK76;O75369-6;O75369-3;E7EN95;O75369-7;A0A804HL72;O75369-5;O75369-4	59;59;59;58;56;56;56;54;54;51;47;47;7;4;2	53;53;53;52;51;50;50;51;51;45;42;42;4;4;2	53;53;53;52;51;50;50;51;51;45;42;42;4;4;2	Filamin-B	FLNB	275.66	2578	2578;2591;2602;2633;2562;2537;2561;2409;2422;2270;2146;2150;521;135;72	0	315.28	0.63273	1.0186	33.292	0.37637	0.57886	1.063	0.90897	0.98223	1.1519	30.217	36.319	17.422	232050000	139570000	92483000	51481000	35443000	16038000	100020000	64444000	35578000	80551000	39684000	40867000
J3QSV6;O76021-2;O76021	J3QSV6;O76021-2;O76021	3;3;3	3;3;3	3;3;3	Ribosomal L1 domain-containing protein 1	RSL1D1	48.208	430	430;270;490	0.00080192	2.0633	0.63358	1.0188	17.643	NaN	0.63358	NaN	NaN	1.0188	NaN	NaN	17.643	NaN	3558800	2153700	1405100	0	0	0	3558800	2153700	1405100	0	0	0
A0A7I2V2E0;P33527-8;P33527-6;P33527-7;P33527-5;P33527-4;P33527-2;P33527-3;P33527;A0A7I2V4C6;I3L4X2;P33527-9;A0A0A0MS99	A0A7I2V2E0;P33527-8;P33527-6;P33527-7;P33527-5;P33527-4;P33527-2;P33527-3;P33527;A0A7I2V4C6;I3L4X2;P33527-9	3;3;3;3;3;3;3;3;3;2;2;2;1	3;3;3;3;3;3;3;3;3;2;2;2;1	3;3;3;3;3;3;3;3;3;2;2;2;1	Multidrug resistance-associated protein 1	ABCC1	154.04	1374	1374;1351;1407;1410;1416;1466;1472;1475;1531;866;1440;1541;1215	0	9.249	0.62975	1.019	60.24	NaN	1.0358	NaN	NaN	1.6205	NaN	NaN	65.604	NaN	3741300	2066000	1675300	1121400	840900	280480	2620000	1225100	1394800	0	0	0
B5MCW2;G5E9G0;P39023;H7C422;H7C3M2;Q92901	B5MCW2;G5E9G0;P39023;H7C422	3;3;3;2;1;1	3;3;3;2;1;1	3;3;3;2;1;1	60S ribosomal protein L3	RPL3	31.243	272	272;351;403;305;261;407	0	11.29	0.61155	1.019	13.429	0.25464	0.61155	1.1186	0.70246	1.019	1.2168	20.728	13.429	4.5631	27984000	16078000	11906000	5683300	4447700	1235600	9986700	5820500	4166200	12314000	5809700	6504400
P00403	P00403	2	2	2	Cytochrome c oxidase subunit 2	MT-CO2	25.565	227	227	0	3.2413	0.843	1.0192	8.9627	NaN	0.51428	0.843	NaN	0.75752	0.91697	NaN	32.999	23.91	11686000	6746700	4939000	1445600	840690	604950	3485800	2124300	1361400	6754300	3781600	2972600
O00231;O00231-2;J3QRY4	O00231;O00231-2;J3QRY4	5;5;4	5;5;4	5;5;4	26S proteasome non-ATPase regulatory subunit 11	PSMD11	47.463	422	422;423;187	0	12.816	0.64993	1.0202	21.573	0.41584	0.64993	0.95752	0.88152	1.043	1.0259	3.6866	22.903	2.6753	12552000	7562200	4989500	2409600	1692300	717270	5709500	3527600	2181800	4432600	2342200	2090400
P06753-2;A0A087WWU8;P06753-3;P06753-6;D6R904;Q5VU61;A0A494C0G0	P06753-2;A0A087WWU8;P06753-3;P06753-6	14;13;12;12;6;3;3	9;9;7;7;4;3;1	0;0;0;0;0;0;0		TPM3	29.032	248	248;227;247;248;95;49;87	0	199.87	0.59677	1.0206	9.71	0.4202	0.53566	1.0434	1.0408	0.92993	0.99721	16.546	14.909	9.9717	253620000	151120000	102500000	47793000	33040000	14753000	84219000	55573000	28646000	121610000	62507000	59101000
P20340-4;P20340-2;C9JB90;C9JU14;J3KR73;Q53S08;Q9NRW1-2;Q9NRW1;P20340;Q14964;Q9H0N0	P20340-4;P20340-2;C9JB90;C9JU14;J3KR73;Q53S08;Q9NRW1-2;Q9NRW1;P20340;Q14964;Q9H0N0	2;2;1;1;1;1;1;1;1;1;1	2;2;1;1;1;1;1;1;1;1;1	2;2;1;1;1;1;1;1;1;1;1	Ras-related protein Rab-6A;Ras-related protein Rab-6B;Ras-related protein Rab-39A;Ras-related protein Rab-6C	RAB6A;RAB6B;RAB6C;RAB39A	19.934	175	175;208;49;83;124;254;195;208;208;217;254	0	5.8462	0.65434	1.0206	9.2764	0.30446	0.65434	1.3372	0.67248	1.0789	1.3743	13.968	17.127	32.802	40200000	22351000	17849000	8493300	6508200	1985100	14529000	8152900	6376100	17178000	7690200	9487800
B4DDD6;Q9UJU6-2;Q9UJU6-3;Q9UJU6-4;F8WBG8;F8WC20;F8WBB2;F8WFE1	B4DDD6;Q9UJU6-2;Q9UJU6-3;Q9UJU6-4	6;6;6;4;2;1;1;1	6;6;6;4;2;1;1;1	0;0;0;0;0;0;0;0	Drebrin-like protein	DBNL	45.746	406	406;431;439;336;128;50;62;87	0	25.491	0.9639	1.0207	36.482	NaN	0.51516	1.0933	NaN	0.73838	1.1471	NaN	59.8	20.479	11707000	6001800	5705600	1414800	1091200	323610	3042800	1582600	1460200	7249800	3328100	3921700
Q70UQ0-4;Q70UQ0	Q70UQ0-4	3;1	3;1	3;1	Inhibitor of nuclear factor kappa-B kinase-interacting protein	IKBIP	43.083	377	377;350	0	4.2671	0.79956	1.0215	22.543	NaN	0.42785	1.428	NaN	0.65287	1.4785	NaN	7.1403	9.1981	12605000	6520600	6084400	0	0	0	4096000	2697200	1398700	8509100	3823400	4685600
Q07960;H0YE29	Q07960;H0YE29	3;2	3;2	3;2	Rho GTPase-activating protein 1	ARHGAP1	50.435	439	439;334	0	58.749	0.74117	1.0217	14.018	0.38023	0.66194	0.89972	0.93069	1.0871	0.9602	34.265	15.559	29.27	28372000	16434000	11937000	3781200	2857300	923850	10480000	6547300	3932700	14110000	7029400	7080900
H7C3T4;Q13162;A6NJJ0	H7C3T4;Q13162	5;5;1	3;3;1	3;3;1	Peroxiredoxin-4	PRDX4	18.214	161	161;271;185	0	7.5757	0.62764	1.0218	9.9602	0.4459	0.59106	0.98283	0.93879	1.0183	1.0447	30.304	2.47	2.646	23899000	14502000	9397700	2842900	1995600	847300	10630000	6636100	3993500	10427000	5869900	4556900
Q9BVK6	Q9BVK6	2	2	1	Transmembrane emp24 domain-containing protein 9	TMED9	27.277	235	235	0	3.3216	0.73164	1.0225	30.798	NaN	0.5621	1.7803	NaN	0.82241	1.9099	NaN	34.123	15.999	12132000	5847000	6285200	0	0	0	4333400	2468800	1864600	7798700	3378100	4420600
Q9BTV4	Q9BTV4	7	7	7	Transmembrane protein 43	TMEM43	44.875	400	400	0	29.777	0.75879	1.0234	16.691	0.30986	0.65689	1.0668	0.8504	1.1083	1.1161	7.8288	30.643	15.989	35896000	19565000	16332000	5290900	3834100	1456800	12124000	6658000	5466300	18481000	9072500	9408500
A0A0C4DGX8;Q15904	A0A0C4DGX8;Q15904	1;1	1;1	1;1	V-type proton ATPase subunit S1	ATP6AP1	38.047	342	342;470	0.0041152	1.4041	0.84036	1.0309	17.275	NaN	NaN	NaN	NaN	NaN	NaN	NaN	NaN	NaN	2033500	1138000	895410	462490	339170	123310	772480	399490	372990	798490	399380	399110
C9IZG4;O60888-3;O60888;O60888-2	C9IZG4;O60888-3;O60888;O60888-2	1;1;1;1	1;1;1;1	1;1;1;1	Protein CutA	CUTA	14.401	135	135;156;179;198	0	2.3918	0.57918	1.0309	31.357	NaN	NaN	NaN	NaN	NaN	NaN	NaN	NaN	NaN	5529100	3188500	2340500	1194700	798920	395830	2167700	1408600	759080	2166700	981040	1185600
Q14008-2;Q14008;Q14008-3;H0YCF6;H0YEK7	Q14008-2;Q14008;Q14008-3;H0YCF6;H0YEK7	2;2;2;1;1	2;2;2;1;1	2;2;2;1;1	Cytoskeleton-associated protein 5	CKAP5	218.52	1972	1972;2032;2039;166;190	0	4.0439	0.92313	1.032	14.654	NaN	NaN	1.0835	NaN	NaN	1.1688	NaN	NaN	18.06	4382600	2262500	2120100	0	0	0	533320	259800	273520	3849300	2002700	1846600
A0A6Q8PGR9;A0A6Q8PGE8;A0A6Q8PF33;A0A6Q8PGN5;P49588;P49588-2;A0A6Q8PFY2;H3BPK7;A0A6Q8PFK3;A0A6Q8PGB5;A0A6Q8PHJ2;A0A6Q8PF77;A0A6Q8PHP3;A0A6Q8PHP7;A0A6Q8PH44;A0A6Q8PG62;A0A6Q8PG28	A0A6Q8PGR9;A0A6Q8PGE8;A0A6Q8PF33;A0A6Q8PGN5;P49588;P49588-2;A0A6Q8PFY2;H3BPK7;A0A6Q8PFK3;A0A6Q8PGB5;A0A6Q8PHJ2;A0A6Q8PF77;A0A6Q8PHP3;A0A6Q8PHP7;A0A6Q8PH44	8;8;8;8;8;8;7;7;6;6;5;4;4;4;4;2;2	8;8;8;8;8;8;7;7;6;6;5;4;4;4;4;2;2	8;8;8;8;8;8;7;7;6;6;5;4;4;4;4;2;2	Alanine--tRNA ligase, cytoplasmic	AARS	103.78	940	940;959;961;984;968;992;977;999;772;925;789;521;535;560;734;278;327	0	10.488	0.75023	1.0321	14.292	0.31191	0.62291	1.0344	0.54298	0.94368	1.1222	17.734	28.887	16.621	19201000	12696000	6504700	2653500	1989000	664540	12692000	8644300	4048100	3854700	2062700	1792100
H0Y512;Q9HDC9;Q9HDC9-2	H0Y512;Q9HDC9;Q9HDC9-2	3;3;2	3;3;2	3;3;2	Adipocyte plasma membrane-associated protein	APMAP	45.294	409	409;416;289	0	5.755	0.84426	1.0338	11.444	0.31913	0.87835	0.97739	0.69592	1.315	1.0338	46.324	1.3791	11.444	12715000	7267200	5447800	2728500	2045500	682950	3446600	1888700	1557900	6539900	3333000	3206900
Q15149;Q15149-7;Q15149-8;Q15149-9;Q15149-5;Q15149-4;Q15149-6;Q15149-3;Q15149-2;H0YDN1;E9PMV1;E9PQ28;E9PIA2;E9PKG0;A0A075B730;P58107	Q15149;Q15149-7;Q15149-8;Q15149-9;Q15149-5;Q15149-4;Q15149-6;Q15149-3;Q15149-2;H0YDN1	118;117;117;117;117;117;117;117;117;84;9;1;1;1;1;1	118;117;117;117;117;117;117;117;117;84;9;1;1;1;1;1	118;117;117;117;117;117;117;117;117;84;9;1;1;1;1;1	Plectin	PLEC	531.78	4684	4684;4515;4525;4533;4547;4547;4551;4570;4574;3447;703;83;174;190;5063;5088	0	323.31	0.67433	1.0339	25.216	0.33452	0.65732	1.0379	0.84757	1.0974	1.1019	29.708	28.057	17.932	1137100000	650030000	487100000	258920000	186330000	72589000	396640000	228660000	167980000	481580000	235040000	246530000
F5H1S8;F5GX14;Q14165	F5H1S8;F5GX14;Q14165	1;1;1	1;1;1	1;1;1	Malectin	MLEC	16.729	146	146;217;292	0	3.1038	0.76943	1.0343	64.679	NaN	NaN	NaN	NaN	NaN	NaN	NaN	NaN	NaN	3437100	1636000	1801000	0	0	0	1963300	1138700	824620	1473700	497310	976430
H3BNI5;Q86WV2;H3BN72;H3BNV9;P13073	H3BNI5;Q86WV2;H3BN72;H3BNV9;P13073	1;1;1;1;1	1;1;1;1;1	1;1;1;1;1	Cytochrome c oxidase subunit 4 isoform 1, mitochondrial	COX4I1	4.8295	43	43;83;126;139;169	0	2.625	0.73166	1.0348	17.323	NaN	NaN	NaN	NaN	NaN	NaN	NaN	NaN	NaN	5120800	3134000	1986800	896030	576880	319150	1655700	1059600	596050	2569100	1497500	1071600
Q9Y3U8	Q9Y3U8	1	1	1	60S ribosomal protein L36	RPL36	12.254	105	105	0.0028592	1.549	0.63699	1.0349	24.714	NaN	NaN	NaN	NaN	NaN	NaN	NaN	NaN	NaN	7298800	4440100	2858600	1997100	1465200	531960	2818000	1711200	1106800	2483600	1263800	1219900
Q8IVF2-3;Q8IVF2;Q8IVF2-2	Q8IVF2-3;Q8IVF2	29;29;7	29;29;7	29;29;7	Protein AHNAK2	AHNAK2	605.64	5695	5695;5795;793	0	159.39	0.61487	1.0354	44.928	0.68339	0.76385	0.43427	1.6776	1.1847	0.45379	27.814	33.902	34.224	124160000	78431000	45730000	8806700	5061600	3745100	58468000	33492000	24976000	56886000	39877000	17009000
P31946-2;P31946;Q4VY20;Q4VY19;A0A0J9YWE8;A0A0J9YWZ2	P31946-2;P31946	12;12;5;5;5;2	7;7;2;2;2;1	7;7;2;2;2;1	14-3-3 protein beta/alpha;14-3-3 protein beta/alpha, N-terminally processed	YWHAB	27.85	244	244;246;74;100;149;81	0	319.69	0.71058	1.0374	15.217	0.35674	0.51003	1.1721	0.95839	0.88067	1.2642	16.449	14.986	10.282	167220000	98745000	68475000	24889000	18694000	6194800	62086000	40284000	21802000	80245000	39767000	40477000
H7C4K3;A0A7I2V2F9;E7EUI6;P05556;A0A7I2V348;C9JPK5;P05556-2;P05556-5;P05556-4;P05556-3;A0A7I2V5Z8;A0A7I2V5T3;H7C4N8;Q5T3E5;E9PQJ2;Q5T3E6;E9PLR6;E7EQW5;C9JNE0	H7C4K3;A0A7I2V2F9;E7EUI6;P05556;A0A7I2V348;C9JPK5;P05556-2;P05556-5;P05556-4;P05556-3	10;10;10;10;9;9;9;9;9;9;4;4;3;2;2;2;2;2;1	10;10;10;10;9;9;9;9;9;9;4;4;3;2;2;2;2;2;1	10;10;10;10;9;9;9;9;9;9;4;4;3;2;2;2;2;2;1	Integrin beta;Integrin beta-1	ITGB1	82.23	741	741;794;801;798;793;809;789;801;819;825;379;380;108;89;104;136;143;163;14	0	22.124	0.60698	1.0375	36.192	0.29653	0.59809	1.3313	0.79776	1.0162	1.4273	5.0008	9.4841	26.352	78577000	44207000	34369000	16613000	12621000	3992000	26951000	17048000	9903300	35013000	14539000	20474000
A0A6Q8PFT2;A0A6Q8PFU3;P43034;A0A6Q8PH33;I3L3N5;A0A6Q8PG63;P43034-2	A0A6Q8PFT2;A0A6Q8PFU3;P43034;A0A6Q8PH33;I3L3N5;A0A6Q8PG63;P43034-2	2;2;2;1;1;1;1	2;2;2;1;1;1;1	2;2;2;1;1;1;1	Platelet-activating factor acetylhydrolase IB subunit alpha	PAFAH1B1	38.948	345	345;428;410;127;208;346;147	0	4.3649	0.80929	1.0376	34.215	NaN	0.80156	1.6464	NaN	1.3141	1.7169	NaN	22.245	105.44	11876000	6530200	5345400	1724200	1223000	501160	5230500	3032800	2197700	4920800	2274300	2646500
A0A494BZV2;Q6WCQ1;Q6WCQ1-2;J3KSW8;Q6WCQ1-3;H0Y2S9;H0Y7E2;H7C3G6	A0A494BZV2;Q6WCQ1;Q6WCQ1-2;J3KSW8;Q6WCQ1-3;H0Y2S9	5;5;5;4;4;3;2;1	5;5;5;4;4;3;2;1	5;5;5;4;4;3;2;1	Myosin phosphatase Rho-interacting protein	MPRIP	274.38	2425	2425;1025;1038;844;1000;1794;1091;277	0	60.313	0.68381	1.0379	80.221	NaN	0.50608	NaN	NaN	0.78314	NaN	NaN	44.811	NaN	4808400	2490000	2318500	0	0	0	2833400	1943600	889820	1975000	546410	1428600
P61160;P61160-2;F5H6T1;A0A1B0GWD0;A0A1B0GWH0	P61160;P61160-2;F5H6T1	7;6;5;1;1	7;6;5;1;1	7;6;5;1;1	Actin-related protein 2	ACTR2	44.76	394	394;399;339;53;65	0	39.637	0.77017	1.0381	29.979	0.42088	0.59508	0.99902	1.1193	0.95036	1.0831	68.057	26.794	19.178	61544000	33059000	28484000	21760000	10615000	11145000	17571000	10284000	7286400	22213000	12160000	10053000
P13639;K7EJ74	P13639	19;1	19;1	18;0	Elongation factor 2	EEF2	95.337	858	858;134	0	81.599	0.77917	1.0382	29.049	0.37099	0.75201	0.9446	0.98108	1.2311	1.0223	84.583	42.711	12.922	218560000	130300000	88261000	53403000	38730000	14673000	77799000	47763000	30036000	87356000	43802000	43553000
P10606	P10606	3	3	3	Cytochrome c oxidase subunit 5B, mitochondrial	COX5B	13.696	129	129	0	3.743	0.64686	1.0383	2.3939	NaN	0.62272	NaN	NaN	1.0383	NaN	NaN	2.3939	NaN	9101700	4834400	4267300	699930	378110	321820	5502500	2726200	2776300	2899200	1730000	1169200
F5GZ78;A0A1B0GTU4;P49023-2;P49023;P49023-3;A0A1B0GU60;P49023-4;F5H836;A0A1B0GV30	F5GZ78;A0A1B0GTU4;P49023-2;P49023;P49023-3;A0A1B0GU60;P49023-4	3;3;3;3;3;2;2;1;1	3;3;3;3;3;2;2;1;1	3;3;3;3;3;2;2;1;1	Paxillin	PXN	64.232	589	589;1081;557;591;605;706;424;176;207	0	32.191	0.75993	1.0402	6.0784	0.28315	0.65051	1.1792	0.51537	0.99644	1.2811	27.389	18.865	4.867	4655200	2945500	1709800	1027600	778780	248800	2126300	1318100	808180	1501400	848580	652770
P17931;G3V3R6	P17931;G3V3R6	4;3	4;3	4;3	Galectin-3;Galectin	LGALS3	26.152	250	250;233	0	6.9443	0.53202	1.0403	38.413	0.36526	0.68575	0.53202	0.98955	1.1627	0.55652	49.819	3.9966	1.1604	33840000	21284000	12556000	9660700	6705000	2955800	16705000	10150000	6555200	7473600	4428800	3044800
P60953;Q5JYX0;A0A590UJK8;P60953-1	P60953;Q5JYX0;A0A590UJK8;P60953-1	4;2;2;2	3;1;1;1	3;1;1;1	Cell division control protein 42 homolog	CDC42	21.258	191	191;136;166;191	0	5.7624	0.74818	1.0403	17.379	0.42171	0.65334	1.0003	0.85487	1.1413	1.0567	23.647	18.192	11.759	35716000	20015000	15701000	1862200	1285200	577000	20226000	11994000	8232500	13628000	6736300	6891300
Q15907;H3BMH2;H3BSC1;P62491-2;Q15907-2;P62491;B4DQU5	Q15907;H3BMH2;H3BSC1;P62491-2;Q15907-2;P62491	3;2;2;2;2;2;1	3;2;2;2;2;2;1	3;2;2;2;2;2;1	Ras-related protein Rab-11B;Ras-related protein Rab-11A	RAB11B;RAB11A	24.488	218	218;155;198;155;179;216;146	0	11.501	0.63211	1.0409	7.5085	0.34406	NaN	1.1454	0.95428	NaN	1.2206	27.621	NaN	4.7865	12192000	6852600	5339800	4369500	3116300	1253200	1078600	498560	580090	6744200	3237800	3506400
Q969X5-2;Q969X5	Q969X5-2;Q969X5	1;1	1;1	1;1	Endoplasmic reticulum-Golgi intermediate compartment protein 1	ERGIC1	22.16	198	198;290	0.0089457	1.171	0.54555	1.0412	10.663	0.4918	NaN	NaN	0.96855	NaN	NaN	10.225	NaN	NaN	3935800	2478800	1457000	2115900	1551000	564900	0	0	0	1819900	927800	892090
Q96FQ6	Q96FQ6	2	2	2	Protein S100-A16	S100A16	11.801	103	103	0	3.6173	0.7325	1.0414	40.52	0.19133	0.7325	NaN	0.51397	1.2564	NaN	38.926	13.969	NaN	23540000	14127000	9412400	6215600	4891100	1324500	10039000	5365400	4673300	7285400	3870800	3414600
P62753;A2A3R7;A2A3R5	P62753;A2A3R7;A2A3R5	4;3;2	4;3;2	4;3;2	40S ribosomal protein S6	RPS6	28.68	249	249;91;218	0	11.693	0.59972	1.0416	31.936	0.36693	0.70172	0.93666	0.97047	1.191	1.0104	47.273	35.7	4.2453	46667000	27051000	19616000	14382000	9723200	4659100	19419000	10632000	8786900	12866000	6696100	6169700
O15144;C9JTV5;G5E9J0;G5E9S7;H7C3F9	O15144	6;2;2;1;1	6;2;2;1;1	6;2;2;1;1	Actin-related protein 2/3 complex subunit 2	ARPC2	34.333	300	300;89;91;38;165	0	7.4943	0.56164	1.0419	18.17	0.44812	0.50239	1.0051	1.0656	0.85762	1.089	32.393	32.525	41.689	48109000	28628000	19481000	11698000	8572300	3126200	12954000	8046000	4908500	23456000	12009000	11446000
J3KN66;Q5JTV8;Q5JTV8-3;A0A0A0MSK5;H0YD16;H0Y4R4;Q5JTV8-2	J3KN66;Q5JTV8;Q5JTV8-3;A0A0A0MSK5	5;5;5;4;2;2;2	5;5;5;4;2;2;2	5;5;5;4;2;2;2	Torsin-1A-interacting protein 1	TOR1AIP1	67.821	599	599;583;584;462;198;296;379	0	7.7196	0.71929	1.0425	25.673	0.58227	0.79401	0.95039	1.0323	1.1546	1.0095	8.6056	24.859	21.92	7435300	3953800	3481400	1061200	677880	383320	2994700	1765500	1229100	3379400	1510400	1869000
P00491	P00491	1	1	1	Purine nucleoside phosphorylase	PNP	32.118	289	289	0	2.9205	0.74023	1.0445	32.568	NaN	NaN	NaN	NaN	NaN	NaN	NaN	NaN	NaN	2264300	1052200	1212000	425000	242110	182890	710390	308380	402000	1128900	501750	627160
P28838-2;P28838;H0Y9Q1	P28838-2;P28838;H0Y9Q1	2;2;1	2;2;1	2;2;1	Cytosol aminopeptidase	LAP3	52.771	488	488;519;208	0	4.374	0.65686	1.0456	32.073	NaN	NaN	NaN	NaN	NaN	NaN	NaN	NaN	NaN	4794100	2993200	1800900	1769700	1437500	332240	0	0	0	3024400	1555700	1468700
J3KRJ9;Q9P299	J3KRJ9;Q9P299	1;1	1;1	1;1	Coatomer subunit zeta-2	COPZ2	16.022	141	141;210	0.0014815	1.6896	0.7308	1.0469	35.071	NaN	NaN	0.72209	NaN	NaN	0.77601	NaN	NaN	49.573	3898800	2303100	1595700	0	0	0	1033100	658130	375020	2865600	1645000	1220700
P51571;A6NLM8	P51571	4;1	4;1	4;1	Translocon-associated protein subunit delta	SSR4	18.998	173	173;148	0	4.908	0.48733	1.0477	0.094032	0.43563	0.46727	NaN	1.0477	0.81562	NaN	0.094032	30.322	NaN	11522000	7028600	4493800	3852300	2745000	1107400	5038100	3071100	1966900	2632000	1212500	1419500
P28072	P28072	2	2	2	Proteasome subunit beta type-6	PSMB6	25.357	239	239	0.00078864	1.972	0.65044	1.048	24.394	0.46773	0.60964	NaN	0.95367	0.94463	NaN	10.427	10.326	NaN	8962800	4682000	4280800	2442900	1384200	1058700	3505500	2231300	1274200	3014400	1066500	1947900
A0A0J9YX89;A0A087X1G7;O60613	A0A0J9YX89;A0A087X1G7;O60613	1;1;1	1;1;1	1;1;1	15 kDa selenoprotein	2022-09-15	10.186	88	88;164;165	0.0073333	1.3199	0.8556	1.0481	17.806	NaN	NaN	NaN	NaN	NaN	NaN	NaN	NaN	NaN	1262100	638290	623830	0	0	0	389200	195250	193950	872920	443030	429880
Q5JP53;P07437;Q5ST81;A6NNZ2;G3V2A3;M0R1I1	Q5JP53;P07437;Q5ST81	16;16;13;5;4;1	4;4;1;0;0;0	3;3;1;0;0;0	Tubulin beta chain	TUBB	47.766	426	426;444;372;444;189;74	0	137.96	0.57382	1.0488	24.817	0.30685	0.55454	1.2311	0.7805	1.0602	1.22	10.249	5.3611	11.276	283030000	171610000	111420000	89821000	69207000	20614000	72980000	46966000	26014000	120230000	55438000	64791000
CON__Q1A7A4	CON__Q1A7A4	3	3	3			188.74	1677	1677	0	3.6342	0.98799	1.0494	27.4	NaN	NaN	0.98799	NaN	NaN	1.0494	NaN	NaN	27.4	2022700	1129100	893650	0	0	0	0	0	0	2022700	1129100	893650
P50990-3;P50990-2;P50990;H7C4C8;H7C2U0	P50990-3;P50990-2;P50990	11;11;11;3;2	11;11;11;3;2	11;11;11;3;2	T-complex protein 1 subunit theta	CCT8	51.586	475	475;529;548;323;107	0	40.418	0.83612	1.0498	22.239	0.34412	0.60749	0.97996	0.86158	0.98101	1.064	14.293	8.3989	29.178	67657000	39691000	27966000	14633000	10500000	4133000	18611000	10984000	7626700	34414000	18207000	16207000
M0QZC5;P62280	M0QZC5;P62280	1;1	1;1	1;1	40S ribosomal protein S11	RPS11	13.997	118	118;158	0.0029176	1.6327	0.83652	1.0508	22.205	NaN	NaN	NaN	NaN	NaN	NaN	NaN	NaN	NaN	15825000	9336500	6488600	5941000	4067500	1873500	3458300	1737000	1721300	6425800	3532000	2893800
P20929-4;P20929;P20929-3;P20929-2;H7C2D0;H7C2Z5;H0Y3P5;H0Y786	P20929-4;P20929;P20929-3;P20929-2	3;3;3;3;1;1;1;1	3;3;3;3;1;1;1;1	3;3;3;3;1;1;1;1	Nebulin	NEB	772.92	6669	6669;6669;8525;8525;250;401;659;3007	0.002849	1.5307	1.1748	1.051	62.389	0.66331	NaN	NaN	1.5843	NaN	NaN	97.715	NaN	NaN	20864000	11520000	9344000	10072000	5251700	4819900	5202800	3190200	2012600	5589700	3078200	2511500
P35754	P35754	2	2	2	Glutaredoxin-1	GLRX	11.776	106	106	0	7.1941	0.87693	1.0517	4.8859	NaN	0.69157	0.92807	NaN	1.367	0.99066	NaN	22.486	15.248	21526000	12182000	9344800	3489500	2532100	957480	6588400	3837100	2751300	11449000	5812500	5636000
P28482-2;P28482	P28482-2;P28482	5;5	5;5	4;4	Mitogen-activated protein kinase 1	MAPK1	36.432	316	316;360	0	22.707	0.70419	1.0521	18.481	0.47365	0.49542	0.99114	0.93965	1.1433	1.0599	12.851	22.782	12.16	21608000	11655000	9953000	2237900	1685800	552090	6065600	4148500	1917100	13305000	5820800	7483800
Q8TD55-2;Q8TD55;C9J4A7	Q8TD55-2;Q8TD55	3;3;1	3;3;1	3;3;1	Pleckstrin homology domain-containing family O member 2	PLEKHO2	47.785	440	440;490;227	0	6.3138	0.62077	1.0536	16.737	0.55472	0.67866	NaN	1.0392	1.0536	NaN	22.392	18.36	NaN	3396600	2167300	1229300	865750	630320	235430	2530800	1537000	993850	0	0	0
P61981	P61981	13	10	9	14-3-3 protein gamma;14-3-3 protein gamma, N-terminally processed	YWHAG	28.302	247	247	0	266.76	0.60118	1.0538	17.04	0.42061	0.55307	1.1445	1.1235	0.94655	1.1969	10.554	12.125	22.111	208460000	119820000	88638000	39874000	27964000	11911000	65788000	43467000	22321000	102800000	48391000	54406000
CON__Q29RQ1;P10643	CON__Q29RQ1	5;1	5;1	5;1			93.089	843	843;843	0	5.7189	0.98033	1.0543	13.222	NaN	0.78496	0.98578	NaN	0.97857	1.0766	NaN	9.552	22.067	4513400	2240800	2272600	0	0	0	693610	389710	303900	3819800	1851000	1968700
K7ELL7;P14314-2;P14314;A0A0C4DGP4;K7EKX1;K7EJ70;K7EPW7;A0A7I2V2T6	K7ELL7;P14314-2;P14314	12;11;11;5;3;3;3;3	12;11;11;5;3;3;3;3	12;11;11;5;3;3;3;3	Glucosidase 2 subunit beta	PRKCSH	60.192	535	535;525;528;200;140;144;168;171	0	96.08	0.79659	1.0547	9.0774	0.26813	0.73081	1.0083	0.70925	1.2093	1.0542	21.967	18.251	8.5152	110750000	63329000	47420000	28837000	20740000	8096700	27469000	16185000	11284000	54443000	26404000	28039000
A0A7I2V2H3;A0A024RA52;P25787;A0A7I2YQP7;C9JCK5	A0A7I2V2H3;A0A024RA52;P25787	3;3;3;1;1	3;3;3;1;1	3;3;3;1;1	Proteasome subunit alpha type;Proteasome subunit alpha type-2	PSMA2	19.914	182	182;234;234;156;164	0	2.8487	0.53716	1.0554	37.531	NaN	0.46886	NaN	NaN	0.74431	NaN	NaN	40.475	NaN	6685400	3952200	2733100	2339600	1510800	828820	2503100	1577600	925470	1842700	863830	978830
H0YF00;E9PJA7;A0A1W2PQ43;E9PK09;E9PQN2;E9PKI6;E9PK91;Q9NYF8-4;Q9NYF8-3;Q9NYF8-2;Q9NYF8	H0YF00;E9PJA7;A0A1W2PQ43;E9PK09;E9PQN2;E9PKI6;E9PK91;Q9NYF8-4;Q9NYF8-3;Q9NYF8-2;Q9NYF8	1;1;1;1;1;1;1;1;1;1;1	1;1;1;1;1;1;1;1;1;1;1	1;1;1;1;1;1;1;1;1;1;1	Bcl-2-associated transcription factor 1	BCLAF1	13.236	118	118;467;703;725;750;752;871;747;869;918;920	0.0015015	1.7388	0.60122	1.0555	14.62	0.61101	0.60122	NaN	1.1697	0.91447	NaN	0.17593	5.9303	NaN	3343400	2309300	1034000	1364800	1097700	267040	1978600	1211600	766990	0	0	0
A0A0A6YYA0;Q86XR7-2;Q9Y3B3-2;Q9Y3B3	A0A0A6YYA0;Q86XR7-2;Q9Y3B3-2;Q9Y3B3	1;1;1;1	1;1;1;1	1;1;1;1	Transmembrane emp24 domain-containing protein 7	TMED7-TICAM2;TMED7	21.233	188	188;404;188;224	0.0029197	1.6364	0.51531	1.0564	10.214	NaN	NaN	NaN	NaN	NaN	NaN	NaN	NaN	NaN	4406100	2808800	1597200	1881200	1293800	587360	2524900	1515000	1009900	0	0	0
P62820;E7END7;P62820-3;P62820-2;Q92928;A0A2R8YDI9;H0YLJ8;H0YL94;H0YMN7;H0YNE9;G3V196;A0A2R8YFB8;Q92930;P61006-2;P59190-2;P59190	P62820;E7END7;P62820-3;P62820-2	6;5;5;5;2;1;1;1;1;1;1;1;1;1;1;1	6;5;5;5;2;1;1;1;1;1;1;1;1;1;1;1	3;3;3;3;0;0;0;0;0;0;0;0;0;0;0;0	Ras-related protein Rab-1A	RAB1A	22.677	205	205;173;129;141;201;44;47;48;92;188;237;246;207;207;208;212	0	179.86	0.66041	1.0564	8.3882	0.3354	0.66869	1.081	0.80595	1.1363	1.1422	8.3137	4.5753	11.006	87389000	54222000	33167000	25606000	18918000	6687700	31222000	19603000	11620000	30561000	15701000	14860000
Q9NR31;X1WI22;D6RAA2;H0Y5E8;Q5SQT8;D6RDB2;D6RD69;Q9NR31-2;Q9Y6B6	Q9NR31;X1WI22;D6RAA2;H0Y5E8;Q5SQT8;D6RDB2;D6RD69;Q9NR31-2;Q9Y6B6	2;1;1;1;1;1;1;1;1	2;1;1;1;1;1;1;1;1	2;1;1;1;1;1;1;1;1	GTP-binding protein SAR1a;GTP-binding protein SAR1b	SAR1A;SAR1B	22.367	198	198;50;103;115;121;144;170;155;198	0	4.1642	0.64758	1.0575	3.0439	0.26482	0.64758	1.1241	0.71266	1.0575	1.2414	18.835	3.0439	12.172	20719000	12474000	8245100	5779900	4545000	1234900	6334400	4000400	2334100	8605000	3928900	4676100
CON__P01966;A0A2R8Y7C0;P02008	CON__P01966;A0A2R8Y7C0	6;3;1	6;3;1	3;0;0			15.184	142	142;134;142	0	72.637	0.52645	1.0592	16.75	0.41695	1.508	0.46396	1.0206	2.7002	0.47782	11.676	80.837	35.888	457180000	271460000	185720000	81717000	57224000	24493000	147810000	57088000	90724000	227650000	157150000	70500000
P46940;A0A0J9YXZ5;H0YLE8;H0YKA5;A0A087WWP1;A0A087X225;F2Z2E2;Q86VI3	P46940;A0A0J9YXZ5;H0YLE8	34;26;21;2;2;1;1;1	34;26;21;2;2;1;1;1	34;26;21;2;2;1;1;1	Ras GTPase-activating-like protein IQGAP1	IQGAP1	189.25	1657	1657;1191;1085;43;107;48;1588;1631	0	323.31	0.60246	1.0592	37.276	0.46901	0.59099	1.0772	1.1309	0.96728	1.1428	24.216	18.22	45.202	225960000	131490000	94470000	40571000	27153000	13418000	88855000	56409000	32446000	96535000	47928000	48607000
H7C3P7;P11233	H7C3P7;P11233	3;3	3;3	3;3	Ras-related protein Ral-A	RALA	18.26	164	164;206	0	2.5116	0.51657	1.0602	11.891	NaN	NaN	NaN	NaN	NaN	NaN	NaN	NaN	NaN	8278200	4720400	3557800	2038900	1402900	635970	1629800	1027400	602370	4609500	2290100	2319500
A0A669KB62;A0A669KB05;C9JZR2;H0YC95;O60716-8;O60716-7;O60716-5;O60716-3;O60716-6;O60716-4;O60716-2;O60716;O60716-24;O60716-23;O60716-21;O60716-19;O60716-22;O60716-20;O60716-16;O60716-18;O60716-15;O60716-17;O60716-13;O60716-11;O60716-14;O60716-12;O60716-10;O60716-9	A0A669KB62;A0A669KB05;C9JZR2;H0YC95;O60716-8;O60716-7;O60716-5;O60716-3;O60716-6;O60716-4;O60716-2;O60716;O60716-24;O60716-23;O60716-21;O60716-19;O60716-22;O60716-20;O60716-16;O60716-18;O60716-15;O60716-17;O60716-13;O60716-11;O60716-14;O60716-12;O60716-10;O60716-9	2;2;2;2;2;2;2;2;2;2;2;2;1;1;1;1;1;1;1;1;1;1;1;1;1;1;1;1	2;2;2;2;2;2;2;2;2;2;2;2;1;1;1;1;1;1;1;1;1;1;1;1;1;1;1;1	2;2;2;2;2;2;2;2;2;2;2;2;1;1;1;1;1;1;1;1;1;1;1;1;1;1;1;1	Catenin delta-1	CTNND1	99.077	888	888;915;938;940;912;918;933;939;941;947;962;968;811;817;832;838;840;846;858;861;864;867;879;885;887;893;908;914	0	2.9759	0.60102	1.0605	86.817	NaN	NaN	NaN	NaN	NaN	NaN	NaN	NaN	NaN	2823900	1952000	871910	1092200	921180	171000	641300	561600	79700	1090500	469250	621210
Q9NQC3-2;Q9NQC3-5;Q9NQC3;F8W914;Q9NQC3-4;H7C106;Q9NQC3-3;Q9NQC3-6;A0A0U1RQR6	Q9NQC3-2;Q9NQC3-5;Q9NQC3;F8W914;Q9NQC3-4	10;10;10;9;6;4;4;4;3	10;10;10;9;6;4;4;4;3	10;10;10;9;6;4;4;4;3	Reticulon-4;Reticulon	RTN4	40.317	373	373;392;1192;345;960;203;199;986;127	0	129.81	0.6787	1.0612	33.233	0.32433	0.64946	0.96709	0.74813	1.17	1.0369	34.163	38.419	41.956	496860000	292690000	204170000	94712000	72769000	21943000	172990000	107400000	65589000	229150000	112510000	116640000
P16615-5;P16615-2;P16615-3;P16615;H7C5W9;P16615-4;O14983-2;O14983;O14983-3;Q93084-4;Q93084;Q93084-3;Q93084-7;Q93084-1;Q93084-6;Q93084-5;H3BVB2;H3BTW4	P16615-5;P16615-2;P16615-3;P16615;H7C5W9;P16615-4	9;9;9;9;7;7;4;4;3;3;3;3;3;3;3;3;1;1	9;9;9;9;7;7;4;4;3;3;3;3;3;3;3;3;1;1	9;9;9;9;7;7;4;4;3;3;3;3;3;3;3;3;1;1	Sarcoplasmic/endoplasmic reticulum calcium ATPase 2	ATP2A2	109.73	997	997;997;999;1042;933;1015;994;1001;869;998;999;1029;1033;1043;1044;1052;113;128	0	26.364	0.63663	1.0627	24.66	0.49223	0.52686	0.85673	1.0389	0.84843	0.89626	28.146	21.641	19.745	21082000	11563000	9519300	8980500	4780500	4200000	6048500	4045400	2003100	6052900	2736700	3316200
A0A7P0TAW3;P55072;A0A7P0TAQ1;A0A7I2V540;C9JUP7;A0A7P0Z4C6;A0A7P0T8Q5;A0A7P0T8A3;A0A7I2V2Y2;A0A7I2V5G8;A0A7P0TAY0;A0A7P0Z4D1;A0A7P0TBK7;A0A7I2YQJ0;A0A7P0T8D6;A0A7P0T971;A0A7P0T946;A0A7P0T8Q4;A0A7P0T9X5	A0A7P0TAW3;P55072;A0A7P0TAQ1;A0A7I2V540;C9JUP7;A0A7P0Z4C6;A0A7P0T8Q5;A0A7P0T8A3	21;21;20;20;19;18;18;18;9;6;3;2;2;1;1;1;1;1;1	21;21;20;20;19;18;18;18;9;6;3;2;2;1;1;1;1;1;1	21;21;20;20;19;18;18;18;9;6;3;2;2;1;1;1;1;1;1	Transitional endoplasmic reticulum ATPase	VCP	86.118	772	772;806;733;804;761;694;754;760;458;334;237;102;107;43;50;55;77;77;110	0	199.07	0.75684	1.063	39.023	0.34695	0.71223	0.94943	0.76142	1.1471	1.019	38.264	24.951	24.112	167070000	96176000	70889000	34553000	25403000	9149900	56571000	31343000	25229000	75941000	39431000	36510000
Q32Q12;P22392;P22392-2;J3KPD9;O60361;F6XY72	Q32Q12;P22392;P22392-2;J3KPD9;O60361	7;7;7;6;5;3	7;7;7;6;5;3	2;2;2;1;2;1	Nucleoside diphosphate kinase;Nucleoside diphosphate kinase B;Putative nucleoside diphosphate kinase	NME1-NME2;NME2;NME2P1	32.642	292	292;152;267;197;137;82	0	17.407	0.7367	1.0637	14.401	0.3452	0.74366	0.97237	0.92195	1.2742	1.0366	11.45	34.002	14.458	162800000	96347000	66454000	44074000	31848000	12226000	66981000	38635000	28346000	51746000	25864000	25882000
Q5T092;A0A0A0MR06;Q5T091;O15258;Q5T093	Q5T092;A0A0A0MR06;Q5T091;O15258;Q5T093	3;3;3;3;2	3;3;3;3;2	3;3;3;3;2	Protein RER1	RER1	18.388	158	158;177;187;196;117	0	6.6825	0.57319	1.0656	132.14	0.38899	0.31905	NaN	1.1077	0.44068	NaN	166.75	141.73	NaN	10690000	5977700	4712000	4244300	2504100	1740100	1242000	771050	470980	5203400	2702500	2500900
Q9NYU2-2;Q9NYU2	Q9NYU2-2;Q9NYU2	5;5	5;5	5;5	UDP-glucose:glycoprotein glucosyltransferase 1	UGGT1	174.97	1531	1531;1555	0	5.486	0.77536	1.0662	15.601	0.54037	NaN	NaN	1.008	NaN	NaN	21.583	NaN	NaN	2129700	1237600	892060	1418900	891230	527710	0	0	0	710770	346420	364350
Q9NVD7;E9PS97;A0A087WZB5;Q9NVD7-2;Q9HBI1-3;Q9HBI1;Q9HBI1-2	Q9NVD7;E9PS97	3;2;1;1;1;1;1	3;2;1;1;1;1;1	3;2;1;1;1;1;1	Alpha-parvin	PARVA	42.243	372	372;209;289;182;327;364;397	0	18.585	0.63954	1.0676	10.559	0.46001	0.61057	1.1355	0.98758	0.98203	1.2062	1.7229	42.35	16.603	11353000	6366600	4986200	2904000	2063300	840760	4702400	2741700	1960700	3746400	1561600	2184800
A0A6Q8PG88;A0A7I2S2S9;Q9HAV0;H7C5J5;A0A6Q8PFW8;A0A6Q8PFE0;A0A6Q8PFV8;C9JD14	A0A6Q8PG88;A0A7I2S2S9;Q9HAV0;H7C5J5;A0A6Q8PFW8;A0A6Q8PFE0;A0A6Q8PFV8	5;5;5;4;4;4;4;1	1;1;1;1;1;1;1;0	1;1;1;1;1;1;1;0	Guanine nucleotide-binding protein subunit beta-4	GNB4	33.439	304	304;327;340;242;245;306;322;79	0	2.3662	0.93565	1.0696	20.303	NaN	NaN	NaN	NaN	NaN	NaN	NaN	NaN	NaN	8190100	4544800	3645400	1565700	1161600	404140	2627400	1576300	1051100	3997000	1806900	2190100
P06396-2;A0A0A0MS51;A0A0A0MT01;P06396-4;P06396-3;P06396;Q5T0I0;Q5T0H8	P06396-2;A0A0A0MS51;A0A0A0MT01;P06396-4;P06396-3;P06396	23;22;22;22;22;22;5;2	23;22;22;22;22;22;5;2	10;9;9;9;9;9;2;1	Gelsolin	GSN	80.64	731	731;748;767;739;742;782;260;67	0	296.17	0.57289	1.0706	20.805	0.41259	0.50872	1.2313	0.9925	0.85064	1.3005	21.118	29.346	14.865	625260000	360870000	264390000	170460000	110590000	59868000	220640000	143970000	76673000	234160000	106300000	127850000
K7EQH0;K7ER04;K7EL99;K7EP07;K7EK42;A0A494C0X0;Q99426-2;Q99426	K7EQH0;K7ER04;K7EL99;K7EP07;K7EK42;A0A494C0X0;Q99426-2;Q99426	1;1;1;1;1;1;1;1	1;1;1;1;1;1;1;1	1;1;1;1;1;1;1;1	Tubulin-folding cofactor B	TBCB	5.0477	45	45;60;133;169;191;282;193;244	0.0028902	1.5944	0.79988	1.0707	11.997	NaN	NaN	0.90041	NaN	NaN	0.95469	NaN	NaN	16.219	2501500	1540300	961200	0	0	0	710880	449590	261290	1790600	1090700	699910
P21399	P21399	1	1	1	Cytoplasmic aconitate hydratase	ACO1	98.398	889	889	0	5.1553	1.0141	1.0718	51.366	NaN	NaN	NaN	NaN	NaN	NaN	NaN	NaN	NaN	2142900	1266800	876050	628560	502700	125860	626530	335830	290700	887770	428290	459480
P63010;P63010-2;A0A087X253;P63010-3;A0A087WU93;A0A087WZQ6;A0A087WYD1;K7EN71;K7ERB2;K7EJX1	P63010;P63010-2;A0A087X253;P63010-3;A0A087WU93;A0A087WZQ6	9;9;8;8;5;5;4;2;2;1	9;9;8;8;5;5;4;2;2;1	6;6;6;5;3;3;3;1;1;1	AP-2 complex subunit beta	AP2B1	104.55	937	937;951;913;880;663;677;639;132;151;80	0	37.58	0.57058	1.0722	25.472	0.32612	0.5251	1.308	0.6847	0.86278	1.3846	29.123	29.636	19.276	54502000	31313000	23189000	8033500	6046500	1987000	24777000	14700000	10078000	21691000	10567000	11124000
P18206-2;P18206;P18206-3	P18206-2;P18206	41;41;6	41;41;6	41;41;6	Vinculin	VCL	116.72	1066	1066;1134;222	0	245.16	0.6188	1.0723	27.898	0.36014	0.6102	1.4161	0.91423	1.062	1.5118	25.8	38.286	13.639	460420000	262300000	198130000	101760000	67110000	34650000	159870000	96241000	63633000	198790000	98945000	99844000
E7EX17;P23588-2;P23588;F8VYE9;F8VSC7;F8VP89;F8VX11;F8W0K0;F8VRU1	E7EX17;P23588-2;P23588	5;5;5;2;2;2;2;1;1	5;5;5;2;2;2;2;1;1	5;5;5;2;2;2;2;1;1	Eukaryotic translation initiation factor 4B	EIF4B	69.697	616	616;572;611;185;227;275;360;169;175	0	57.79	1.0364	1.0743	13.799	0.43394	1.0331	1.0364	0.7753	1.4753	1.0743	8.0409	30.021	8.9077	7927100	4437100	3490000	759310	562280	197030	1725500	932650	792820	5442300	2942200	2500100
P67809;H0Y449;C9J5V9;Q9Y2T7	P67809;H0Y449;C9J5V9	10;8;5;2	10;8;5;2	8;6;5;0	Nuclease-sensitive element-binding protein 1	YBX1	35.924	324	324;374;216;364	0	238.2	0.70592	1.0755	34.959	0.3911	0.70592	0.95415	1.047	1.1756	1.0071	15.815	36.952	9.5582	94956000	53869000	41087000	18749000	14145000	4604000	37844000	21780000	16064000	38363000	17944000	20419000
A0A0C4DFR0;A0A087WYC6;Q96DT5	A0A0C4DFR0;A0A087WYC6;Q96DT5	2;2;2	2;2;2	2;2;2	Dynein heavy chain 11, axonemal	DNAH11	521.05	4523	4523;4523;4516	0.0028571	1.5413	0.88508	1.0788	52.563	NaN	NaN	NaN	NaN	NaN	NaN	NaN	NaN	NaN	895410	471310	424100	237120	110570	126540	0	0	0	658290	360730	297560
Q5JR08;P61586;P08134;Q5JR07;A0A7I2V3G1;C9JNR4;E9PQH6;C9JX21;Q5JR05;Q5JR06;A0A7I2YQV1;E9PN11;U3KQA9;U3KQV3;A0A7I2V5E6;E9PLA2;C9JRM1;P62745	Q5JR08;P61586;P08134;Q5JR07;A0A7I2V3G1;C9JNR4;E9PQH6;C9JX21;Q5JR05;Q5JR06;A0A7I2YQV1;E9PN11;U3KQA9;U3KQV3	4;4;4;3;3;3;3;3;3;2;2;2;2;2;1;1;1;1	4;4;4;3;3;3;3;3;3;2;2;2;2;2;1;1;1;1	4;4;4;3;3;3;3;3;3;2;2;2;2;2;1;1;1;1	Transforming protein RhoA;Rho-related GTP-binding protein RhoC	RHOC;RHOA	21.523	188	188;193;193;127;137;138;169;187;199;91;109;129;248;271;65;66;90;196	0	12.186	0.71812	1.0796	55.93	0.43348	0.71812	0.92282	1.0796	1.241	0.94461	106.48	227.21	54.539	56812000	30098000	26713000	10232000	7152900	3079500	16151000	8885700	7265400	30428000	14060000	16368000
P34932;A0A087WYC1;A0A087WTS8;P34932-2	P34932;A0A087WYC1;A0A087WTS8	19;17;11;3	19;17;11;3	19;17;11;3	Heat shock 70 kDa protein 4	HSPA4	94.33	840	840;699;475;148	0	161.11	0.82303	1.0797	19.312	0.27315	0.69738	1.0585	0.57641	1.1416	1.115	26.019	14.967	26.909	56381000	28782000	27599000	8942200	6762800	2179400	17560000	9597900	7962300	29878000	12421000	17458000
A0A024R4E5;Q00341;Q00341-2;C9JHS7;C9JHZ8;C9JES8;C9JZI8;C9J5E5;C9JIZ1;H0Y394;C9JT62;C9JK79;C9JBS3;C9JEJ8;C9JHN6;C9JMQ6;C9JQ82;H7C2D1;C9JHS9;C9J739;H7BZC3	A0A024R4E5;Q00341;Q00341-2	11;10;9;5;5;5;5;5;5;5;4;4;3;3;3;2;2;2;1;1;1	11;10;9;5;5;5;5;5;5;5;4;4;3;3;3;2;2;2;1;1;1	11;10;9;5;5;5;5;5;5;5;4;4;3;3;3;2;2;2;1;1;1	Vigilin	HDLBP	141.44	1268	1268;1268;1235;126;141;147;164;221;224;973;96;128;69;79;81;46;53;308;17;19;267	0	202.47	0.78975	1.0809	17.299	0.35341	0.70212	0.92769	0.71863	1.1311	0.97863	19.501	10.956	13.903	25015000	13580000	11435000	5227500	3757300	1470200	11522000	6244000	5277700	8265400	3578700	4686700
D6R9I9;P61221;H0Y990;D6RGF4	D6R9I9;P61221;H0Y990;D6RGF4	2;2;1;1	2;2;1;1	2;2;1;1	ATP-binding cassette sub-family E member 1	ABCE1	47.037	421	421;599;147;210	0.0028633	1.5528	0.76377	1.0812	87.897	NaN	1.3134	NaN	NaN	2.0524	NaN	NaN	112.75	NaN	4460600	2296300	2164300	237510	155710	81804	4223100	2140600	2082500	0	0	0
C9J8H1;P36543-2;P36543	C9J8H1;P36543-2;P36543	1;1;1	1;1;1	1;1;1	V-type proton ATPase subunit E 1	ATP6V1E1	23.539	203	203;204;226	0.00078431	1.9347	1.0334	1.0814	7.052	NaN	NaN	NaN	NaN	NaN	NaN	NaN	NaN	NaN	1626800	834150	792690	332690	200980	131710	501890	262400	239490	792250	370770	421480
A0A6I8PTT9;Q06210-2;Q06210;A0A6I8PRN4;E5RJP4	A0A6I8PTT9;Q06210-2;Q06210;A0A6I8PRN4	9;9;9;8;1	9;9;9;8;1	7;7;7;6;0	Glutamine--fructose-6-phosphate aminotransferase [isomerizing] 1	GFPT1	70.431	625	625;681;699;609;216	0	32.28	0.6081	1.0818	38.337	0.4056	0.73737	1.6317	0.81537	1.1854	1.7683	37.653	38.134	8.1796	18707000	11184000	7522100	8226500	5691000	2535500	7526300	4628100	2898200	2953700	865380	2088400
P05455;E9PGX9;E7ERC4	P05455	3;1;1	3;1;1	3;1;1	Lupus La protein	SSB	46.836	408	408;120;184	0	6.8146	0.83945	1.0859	8.4907	0.37955	NaN	1.0186	0.91321	NaN	1.0859	24.533	NaN	8.4907	11984000	7235900	4748000	4621600	3362600	1258900	2706400	1566500	1139900	4655900	2306700	2349200
Q9Y2D5-6;Q9Y2D5-4;Q9Y2D5-5;Q9Y2D5-7;C9JVY5;Q9Y2D5;B1ALY0;C9JZH4;Q8IXS6-2	Q9Y2D5-6;Q9Y2D5-4;Q9Y2D5-5;Q9Y2D5-7;C9JVY5;Q9Y2D5	9;9;7;7;6;6;2;1;1	9;9;7;7;6;6;2;1;1	9;9;7;7;6;6;2;1;1	A-kinase anchor protein 2	AKAP2	120.63	1090	1090;1103;948;961;778;859;433;180;411	0	60.102	0.84011	1.0865	8.7054	0.67644	0.59667	1.0159	1.2226	0.94337	1.1153	13.543	11.618	19.867	19224000	10959000	8264200	1990000	1319400	670550	6878800	4116800	2762000	10355000	5523100	4831700
P0DP25;P0DP24;P0DP23;E7EMB3;M0QZ52;F8WBR5;G3V479;Q96HY3;G3V361;A0A590UJI2;P27482;A0A590UJC0;G3V226;C9J7T9;P02585	P0DP25;P0DP24;P0DP23;E7EMB3;M0QZ52;F8WBR5;G3V479	8;8;8;7;6;5;5;3;2;2;2;1;1;1;1	8;8;8;7;6;5;5;3;2;2;2;1;1;1;1	8;8;8;7;6;5;5;3;2;2;2;1;1;1;1		CALM2;CALM3;CALM1	16.837	149	149;149;149;196;83;65;83;113;98;104;149;59;76;145;160	0	116.83	0.59964	1.0883	26.508	0.45824	0.67914	0.86019	1.1189	1.1347	0.88593	28.202	89.796	15.768	629560000	357920000	271640000	123900000	81683000	42222000	297450000	178180000	119270000	208210000	98064000	110150000
P25398	P25398	2	2	2	40S ribosomal protein S12	RPS12	14.515	132	132	0	6.5757	0.77856	1.09	9.1991	NaN	0.77149	0.92729	NaN	1.1728	0.99956	NaN	11.562	8.7472	16527000	10275000	6252300	5282200	3772000	1510200	6225200	3847700	2377500	5019900	2655400	2364500
P46783;F6U211;A0A2R8Y7H1;S4R435;A0A2R8YFH6;A0A1W2PQS6;A0A2R8Y6L3;Q9NQ39	P46783;F6U211;A0A2R8Y7H1;S4R435;A0A2R8YFH6;A0A1W2PQS6	3;2;2;2;2;2;1;1	3;2;2;2;2;2;1;1	3;2;2;2;2;2;1;1	40S ribosomal protein S10	RPS10;RPS10-NUDT3	18.898	165	165;172;186;198;213;291;121;176	0	20.77	0.63019	1.0932	62.343	0.63579	NaN	NaN	1.5881	NaN	NaN	82.725	NaN	NaN	8150400	4174400	3976000	3928100	2020000	1908100	4222300	2154500	2067800	0	0	0
J3KTF8;J3QQX2;P52565;J3KRE2;J3KRY1;P52565-2;J3KS60	J3KTF8;J3QQX2;P52565;J3KRE2;J3KRY1;P52565-2;J3KS60	6;6;6;5;4;4;3	6;6;6;5;4;4;3	6;6;6;5;4;4;3	Rho GDP-dissociation inhibitor 1	ARHGDIA	21.517	193	193;235;204;129;249;160;92	0	22.704	0.75335	1.0933	18.494	0.40408	0.58541	1.1225	1.0846	1.0226	1.1469	32.956	19.55	21.793	161940000	92747000	69195000	28961000	20940000	8020200	51277000	33225000	18052000	81705000	38582000	43123000
Q9UM22;Q9UM22-2;Q9UM22-3	Q9UM22;Q9UM22-2	3;2;1	3;2;1	3;2;1	Mammalian ependymin-related protein 1	EPDR1	25.437	224	224;90;163	0	6.0584	0.65962	1.094	34.281	NaN	0.20448	1.7459	NaN	0.33388	1.8816	NaN	22.626	43.242	45377000	29474000	15903000	3310300	2074800	1235500	25949000	20823000	5126600	16118000	6576900	9541100
G3V4X1;P62191-2;P62191	G3V4X1;P62191-2;P62191	1;1;1	1;1;1	1;1;1	26S protease regulatory subunit 4	PSMC1	9.1333	84	84;367;440	0	3.4227	0.68683	1.0942	24.571	NaN	NaN	NaN	NaN	NaN	NaN	NaN	NaN	NaN	5269000	2820800	2448200	1019600	635360	384250	2296600	1278300	1018300	1952800	907120	1045700
H0YN26;P39687;O95626;Q92688-2;O43423;Q92688	H0YN26;P39687;O95626;Q92688-2;O43423;Q92688	2;2;1;1;1;1	2;2;1;1;1;1	2;2;1;1;1;1	Acidic leucine-rich nuclear phosphoprotein 32 family member A;Acidic leucine-rich nuclear phosphoprotein 32 family member D;Acidic leucine-rich nuclear phosphoprotein 32 family member B;Acidic leucine-rich nuclear phosphoprotein 32 family member C	ANP32A;ANP32D;ANP32B;ANP32C	19.997	177	177;249;131;195;234;251	0	2.4554	0.7526	1.0947	73.01	NaN	0.76266	0.64592	NaN	1.1403	0.68992	NaN	11.663	135.3	6369300	3699500	2669700	1397900	1005300	392640	2236500	1183500	1053100	2734800	1510800	1224000
E9PHK0;P05452	E9PHK0;P05452	4;4	1;1	1;1	Tetranectin	CLEC3B	17.794	160	160;202	0.0022124	1.676	0.88485	1.0968	108.45	NaN	NaN	NaN	NaN	NaN	NaN	NaN	NaN	NaN	1678300	896770	781550	0	0	0	631690	239710	391980	1046600	657060	389570
Q16186;A0A087WX59	Q16186;A0A087WX59	2;1	2;1	2;1	Proteasomal ubiquitin receptor ADRM1	ADRM1	42.153	407	407;368	0	10.987	0.81658	1.0972	9.531	NaN	0.76347	NaN	NaN	1.1113	NaN	NaN	1.8019	NaN	3920000	2166300	1753700	0	0	0	1871800	947250	924510	2048200	1219100	829160
O15226;O15226-2	O15226;O15226-2	1;1	1;1	1;1	NF-kappa-B-repressing factor	NKRF	77.672	690	690;705	0.0067295	1.3459	0.68345	1.0976	32.58	NaN	NaN	NaN	NaN	NaN	NaN	NaN	NaN	NaN	3415600	1833700	1581800	855130	482300	372830	647350	337940	309410	1913100	1013500	899600
P24593;C9JXX4	P24593	5;2	5;2	5;2	Insulin-like growth factor-binding protein 5	IGFBP5	30.57	272	272;233	0	13.399	0.66605	1.098	72.336	0.12648	0.73778	NaN	0.33439	1.2118	NaN	14.135	14.785	NaN	57798000	42493000	15305000	33988000	29799000	4188200	17234000	10000000	7233400	6576700	2693300	3883400
Q9Y5Z4-2;Q9Y5Z4	Q9Y5Z4-2;Q9Y5Z4	3;3	3;3	3;3	Heme-binding protein 2	HEBP2	20.859	184	184;205	0	3.7956	0.70738	1.0997	16.235	0.74146	0.60465	NaN	1.5025	0.88313	NaN	20.463	23.341	NaN	6327700	3468400	2859300	3512200	1925300	1586800	1644600	1007100	637450	1170900	535910	634990
Q9BS26	Q9BS26	4	4	4	Endoplasmic reticulum resident protein 44	ERP44	46.971	406	406	0	6.2659	0.80512	1.1016	73.567	0.27162	1.0807	NaN	0.56612	1.6683	NaN	79.229	48.61	NaN	10896000	6886900	4008800	6087900	4479600	1608300	2550200	1252700	1297500	2257700	1154600	1103100
P13667;A0A499FI48;C9JMN9	P13667;A0A499FI48	19;18;2	19;18;2	19;18;2	Protein disulfide-isomerase A4	PDIA4	72.932	645	645;646;163	0	170.7	0.73132	1.1024	12.97	0.32977	0.73132	1.0852	0.90809	1.1696	1.1103	16.993	19.095	12.919	124030000	73264000	50770000	38727000	27253000	11475000	38403000	22515000	15888000	46904000	23496000	23408000
P30050;P30050-2	P30050;P30050-2	4;3	4;3	4;3	60S ribosomal protein L12	RPL12	17.818	165	165;132	0	179.36	0.65635	1.1037	5.7327	0.32194	0.60758	0.97404	0.71632	1.045	1.021	36.83	18.422	14.135	48362000	30024000	18337000	13401000	10076000	3325400	14598000	9770100	4828300	20363000	10179000	10184000
A0A0J9YXF2;Q15165-3;Q15165-1;Q15165;A0A0J9YYJ1	A0A0J9YXF2;Q15165-3;Q15165-1;Q15165;A0A0J9YYJ1	2;2;2;2;1	2;2;2;2;1	2;2;2;2;1	Serum paraoxonase/arylesterase 2	PON2	41.527	375	375;342;354;354;122	0	3.0225	1.0191	1.1062	51.738	NaN	NaN	1.0191	NaN	NaN	1.1062	NaN	NaN	51.738	2078100	851630	1226500	0	0	0	0	0	0	2078100	851630	1226500
E9PLD0;Q9H0U4	E9PLD0;Q9H0U4	4;4	1;1	1;1	Ras-related protein Rab-1B	RAB1B	18.483	169	169;201	0.0078844	1.2677	1.0547	1.1075	16.452	NaN	NaN	NaN	NaN	NaN	NaN	NaN	NaN	NaN	19696000	11656000	8039600	5156400	3923100	1233400	6424600	3909300	2515300	8114500	3823500	4291000
O15460-2;O15460;C9JCP0;C9JX45;A8MXE0;E7ERI1;E7ENX0;E7EPI9;C9JN43;C9JIG4	O15460-2;O15460	6;6;2;2;2;2;2;2;1;1	6;6;2;2;2;2;2;2;1;1	6;6;2;2;2;2;2;2;1;1	Prolyl 4-hydroxylase subunit alpha-2	P4HA2	60.632	533	533;535;146;153;167;184;204;236;101;114	0	11.753	0.88159	1.1082	14.983	0.44492	1.0703	1.033	1.093	1.8557	1.1201	21.231	19.164	11.36	24515000	13170000	11345000	8049500	5459600	2589900	5717300	2830500	2886700	10748000	4879500	5868700
O43242;O43242-2	O43242;O43242-2	2;1	2;1	2;1	26S proteasome non-ATPase regulatory subunit 3	PSMD3	60.977	534	534;356	0	17.619	0.75808	1.1094	22.394	NaN	0.65128	1.2583	NaN	1.0616	1.3264	NaN	28.62	35.203	10825000	5456800	5368400	1130000	758090	371880	3319900	1946000	1373900	6375300	2752800	3622600
O75477	O75477	2	2	1	Erlin-1	ERLIN1	39.171	348	348	0	6.9602	0.81493	1.1103	21.663	NaN	0.81493	NaN	NaN	1.2892	NaN	NaN	19.335	NaN	8676200	5058800	3617500	2322800	1823300	499500	4196300	2072100	2124200	2157100	1163300	993810
P04843;B7Z4L4;F8WF32	P04843;B7Z4L4	14;11;3	14;11;3	14;11;3	Dolichyl-diphosphooligosaccharide--protein glycosyltransferase subunit 1	RPN1	68.569	607	607;435;121	0	43.213	0.72552	1.1105	17.443	0.3838	0.68741	1.0642	0.9477	1.1136	1.1291	30.058	20.214	18.969	87950000	48777000	39173000	22764000	13902000	8861400	21864000	12689000	9175100	43322000	22186000	21137000
F5GWX2;A0A3B3IRV5;Q9NRV9;H0YG71	F5GWX2;A0A3B3IRV5;Q9NRV9;H0YG71	2;2;2;1	2;2;2;1	2;2;2;1	Heme-binding protein 1	HEBP1	14.72	133	133;207;189;62	0.0028349	1.5187	0.5138	1.1124	14.376	NaN	NaN	NaN	NaN	NaN	NaN	NaN	NaN	NaN	5810400	3386500	2423900	2500300	1502900	997420	3310100	1883600	1426500	0	0	0
P0C6C1	P0C6C1	1	1	1	Ankyrin repeat domain-containing protein 34C	ANKRD34C	58.256	535	535	0	3.2456	0.69348	1.1126	28.292	NaN	NaN	1.0339	NaN	NaN	1.0956	NaN	NaN	30.042	26835000	15615000	11220000	6436600	4306500	2130000	7290700	4526000	2764700	13108000	6782200	6325500
P18084;H7C5U2;H7C4W1;V9GZ57	P18084;H7C5U2	4;3;1;1	4;3;1;1	4;3;1;1	Integrin beta-5;Integrin beta	ITGB5	88.053	799	799;401;263;323	0	22.526	0.84492	1.1126	6.0241	NaN	0.64136	1.624	NaN	0.97007	1.7054	NaN	20.912	19.503	10171000	4843700	5327500	385170	279220	105950	2633200	1636300	996910	7152800	2928200	4224600
B4DR61;P61619-3;P61619	B4DR61;P61619-3;P61619	2;2;2	2;2;2	2;2;2	Protein transport protein Sec61 subunit alpha isoform 1	SEC61A1	52.949	482	482;356;476	0.0029112	1.6288	0.69642	1.1128	25.716	NaN	0.56623	NaN	NaN	0.90743	NaN	NaN	28.855	NaN	9936300	5503200	4433000	0	0	0	5320200	3439500	1880700	4616000	2063700	2552300
P24534;C9JZW3;F8WF65;F2Z2G2	P24534	6;2;1;1	6;2;1;1	5;2;1;1	Elongation factor 1-beta	EEF1B2	24.763	225	225;123;29;68	0	81.656	0.71965	1.1135	39.096	0.37396	0.67225	1.1584	1.0128	1.1053	1.2243	10.875	55.553	12.217	65669000	36751000	28918000	16272000	11723000	4549400	20056000	10616000	9440400	29340000	14412000	14928000
Q00688	Q00688	3	3	3	Peptidyl-prolyl cis-trans isomerase FKBP3	FKBP3	25.177	224	224	0	12.856	0.70295	1.1147	26.626	0.48003	0.80336	0.84112	1.1186	1.3476	0.87654	26.129	23.445	11.834	15809000	9124800	6684100	3245500	2234300	1011200	6330400	3538800	2791600	6232900	3351700	2881300
Q0ZGT2-4;Q0ZGT2;E7EUA0;H7BXY5;Q0ZGT2-3;Q0ZGT2-2;E7ETM8	Q0ZGT2-4;Q0ZGT2;E7EUA0;H7BXY5;Q0ZGT2-3;Q0ZGT2-2;E7ETM8	4;4;3;3;3;3;2	4;4;3;3;3;3;2	4;4;3;3;3;3;2	Nexilin	NEXN	72.731	611	611;675;435;576;613;662;321	0	29.824	0.72848	1.1154	62.307	NaN	0.43053	2.038	NaN	0.70014	2.2827	NaN	43.454	8.0369	11182000	5766700	5415000	0	0	0	5844300	3662200	2182100	5337300	2104500	3232800
K7ERI7;P35268;K7EJT5;K7EP65;K7EKS7;K7ELC4;K7EMH1	K7ERI7;P35268;K7EJT5;K7EP65;K7EKS7;K7ELC4;K7EMH1	2;2;1;1;1;1;1	2;2;1;1;1;1;1	2;2;1;1;1;1;1	60S ribosomal protein L22	RPL22	11.168	95	95;128;47;48;53;79;89	0	4.3352	0.63925	1.1161	16.926	NaN	0.6452	NaN	NaN	1.1359	NaN	NaN	2.7085	NaN	12937000	7956800	4980000	3099200	2311000	788120	6939900	4066800	2873100	2897700	1578900	1318800
Q15084-3;Q15084;Q15084-4;Q15084-5;Q15084-2	Q15084-3;Q15084;Q15084-4;Q15084-5;Q15084-2	10;10;10;10;10	10;10;10;10;10	10;10;10;10;10	Protein disulfide-isomerase A6	PDIA6	47.837	437	437;440;445;488;492	0	133.08	0.775	1.1199	20.304	0.32173	0.68867	1.1193	0.71214	1.0776	1.2107	26.171	17.789	8.528	115850000	67701000	48153000	31404000	23302000	8102100	43022000	24801000	18221000	41429000	19599000	21830000
H0YMP2;H0YL71;H3BP09;H3BVD1;K7EJX0;B7Z5N5;P84022-3;P84022-2;P84022;O15198-2;Q15796-2;Q15796;O15198	H0YMP2;H0YL71;H3BP09;H3BVD1;K7EJX0;B7Z5N5;P84022-3;P84022-2;P84022;O15198-2;Q15796-2;Q15796;O15198	1;1;1;1;1;1;1;1;1;1;1;1;1	1;1;1;1;1;1;1;1;1;1;1;1;1	1;1;1;1;1;1;1;1;1;1;1;1;1	Mothers against decapentaplegic homolog;Mothers against decapentaplegic homolog 3;Mothers against decapentaplegic homolog 9;Mothers against decapentaplegic homolog 2	SMAD3;SMAD2;SMAD9	7.3142	63	63;92;114;213;217;431;320;381;425;430;437;467;467	0.0099502	1.0945	1.0261	1.1207	52.005	NaN	NaN	NaN	NaN	NaN	NaN	NaN	NaN	NaN	2456600	1412100	1044400	610010	476440	133570	779440	500520	278920	1067100	435150	631960
Q01518-2;Q01518;Q5T0R1;Q5T0R9;Q5T0R7;Q5T0R6;Q5T0R5;Q5T0R4;Q5T0R3;Q5T0R2;Q5T0S3;Q5T0R8	Q01518-2;Q01518;Q5T0R1;Q5T0R9	13;13;7;7;6;6;6;6;6;6;3;2	13;13;7;7;6;6;6;6;6;6;3;2	13;13;7;7;6;6;6;6;6;6;3;2	Adenylyl cyclase-associated protein 1;Adenylyl cyclase-associated protein	CAP1	51.83	474	474;475;215;262;174;176;179;201;203;208;145;58	0	182.33	0.67251	1.1216	12.55	0.40948	0.6578	1.1067	1.0215	1.1418	1.1742	16.275	16.789	16.012	205010000	114230000	90776000	47619000	34540000	13080000	59339000	35248000	24091000	98051000	44446000	53605000
Q9P2E9;A0A087WVV2;Q9P2E9-3;F8W7S5;A0A087WU26;A2A2S5;V9GY78	Q9P2E9;A0A087WVV2;Q9P2E9-3;F8W7S5	30;23;22;18;9;7;1	30;23;22;18;9;7;1	30;23;22;18;9;7;1	Ribosome-binding protein 1	RRBP1	152.45	1410	1410;934;977;751;346;300;229	0	292.22	0.67428	1.1222	29.895	0.31287	0.66574	1.4353	0.68141	1.0612	1.5287	30.711	22.812	18.059	197930000	83421000	114510000	54885000	32430000	22455000	51240000	30273000	20968000	91807000	20718000	71089000
B7Z7E1;P51911-2;P51911;K7ER02;K7EQ72	B7Z7E1;P51911-2;P51911;K7ER02	3;3;3;2;1	2;2;2;2;1	2;2;2;2;1	Calponin;Calponin-1	CNN1	27.398	247	247;277;297;228;173	0	7.5443	0.86178	1.1227	224.59	NaN	NaN	NaN	NaN	NaN	NaN	NaN	NaN	NaN	2913600	1364600	1549000	0	0	0	1276600	1131500	145020	1637100	233070	1404000
C9J3L8;C9J5W0;A0A3B3IRT8;E9PAL7;C9IZQ1;P43307;P43307-2	C9J3L8;C9J5W0;A0A3B3IRT8;E9PAL7;C9IZQ1;P43307;P43307-2	2;2;2;2;2;2;1	2;2;2;2;2;2;1	2;2;2;2;2;2;1	Translocon-associated protein subunit alpha	SSR1	29.573	265	265;266;288;291;298;286;259	0.0015209	1.7977	0.52363	1.1231	7.5028	NaN	NaN	NaN	NaN	NaN	NaN	NaN	NaN	NaN	7289200	4929600	2359700	2997400	2079900	917460	4291800	2849600	1442200	0	0	0
F5GXS2;O43707;H7C144;O43707-2;O43707-3;K7EP19;D6RH00	F5GXS2;O43707;H7C144;O43707-2;O43707-3	44;44;41;32;25;4;1	44;44;41;32;25;4;1	30;30;27;23;20;2;0	Alpha-actinin-4	ACTN4	104.85	911	911;911;906;692;521;105;72	0	323.31	0.52056	1.1237	31.791	0.48187	0.48878	1.3397	1.1985	0.84726	1.3999	35.179	21.238	27.906	1109700000	668360000	441330000	195860000	127710000	68157000	461020000	318930000	142090000	452800000	221720000	231080000
P23528;G3V1A4;E9PP50;E9PK25;E9PQB7;E9PLJ3;E9PS23	P23528;G3V1A4;E9PP50;E9PK25;E9PQB7;E9PLJ3;E9PS23	10;9;9;9;6;5;5	10;9;9;9;6;5;5	8;7;7;7;4;4;5	Cofilin-1	CFL1	18.502	166	166;149;159;204;122;79;90	0	34.582	0.82531	1.124	44.329	0.45062	0.559	1.1878	1.1646	0.88574	1.2157	18.274	55.631	22.038	625260000	330350000	294910000	64799000	42690000	22109000	211860000	132810000	79054000	348590000	154850000	193750000
H0YL12;H0YKF0;H0YLU7;P13804-2;P13804;H0YK49;H0YNX6	H0YL12;H0YKF0;H0YLU7;P13804-2;P13804;H0YK49;H0YNX6	4;4;4;4;4;2;2	4;4;4;4;4;2;2	4;4;4;4;4;2;2	Electron transfer flavoprotein subunit alpha, mitochondrial	ETFA	24.797	239	239;289;303;284;333;229;254	0	46.038	0.72218	1.1275	15.337	0.31022	0.67321	0.75108	0.62598	1.1053	0.79882	50.285	22.25	14.316	13798000	8656600	5141300	3217500	2148000	1069600	3918200	2541000	1377200	6662100	3967700	2694400
P05198;H0YJS4;G3V4T5	P05198;H0YJS4;G3V4T5	5;3;3	5;3;3	5;3;3	Eukaryotic translation initiation factor 2 subunit 1	EIF2S1	36.112	315	315;252;273	0	26.38	0.67578	1.1276	47.029	0.40195	0.67578	0.89537	1.133	1.1276	0.97795	68.977	47.029	22.557	17847000	9474600	8372700	4838000	2942500	1895500	6347200	3895800	2451400	6662100	2636300	4025900
Q15181;Q5SQT6	Q15181	5;2	5;2	5;2	Inorganic pyrophosphatase	PPA1	32.66	289	289;178	0	10.221	1.0477	1.1291	11.318	NaN	NaN	1.2178	NaN	NaN	1.2874	NaN	NaN	26.696	5044000	2582100	2461900	560510	346840	213670	1511100	985980	525070	2972500	1249300	1723100
Q9Y696	Q9Y696	12	12	12	Chloride intracellular channel protein 4	CLIC4	28.772	253	253	0	242.3	0.68811	1.1295	39.682	0.2925	0.65217	2.9632	0.64655	1.0879	3.0329	22.818	50.477	12.987	300650000	138120000	162520000	56642000	43561000	13081000	86152000	52760000	33392000	157850000	41803000	116050000
E9PJ81;E9PRQ7;Q04323;Q04323-2;A0A087WTZ5	E9PJ81;E9PRQ7;Q04323;Q04323-2;A0A087WTZ5	2;2;2;2;1	2;2;2;2;1	2;2;2;2;1	UBX domain-containing protein 1	UBXN1	32.611	290	290;293;297;312;238	0	43.434	0.8907	1.1296	39.041	NaN	NaN	NaN	NaN	NaN	NaN	NaN	NaN	NaN	808780	418810	389970	0	0	0	422200	254480	167730	386570	164330	222240
CON__P02672	CON__P02672	2	2	2			67.011	615	615	0	2.7478	0.93047	1.1319	91.443	NaN	NaN	NaN	NaN	NaN	NaN	NaN	NaN	NaN	1553100	689580	863520	0	0	0	374220	261550	112670	1178900	428030	750850
E5RFY9;Q9H425-2;Q9H425-3;Q9H425	E5RFY9;Q9H425-2;Q9H425-3;Q9H425	2;2;2;2	2;2;2;2	2;2;2;2	Uncharacterized protein C1orf198	C1orf198	12.419	110	110;197;289;327	0.0028674	1.5559	0.69941	1.1332	51.133	0.63557	NaN	NaN	1.0626	NaN	NaN	72.122	NaN	NaN	3066400	1808500	1257900	1404800	806920	597920	1661500	1001600	659990	0	0	0
A6NP52;O60831	A6NP52;O60831	1;1	1;1	1;1	PRA1 family protein 2	PRAF2	17.188	160	160;178	0.0089571	1.1723	0.85879	1.1333	30.614	NaN	NaN	NaN	NaN	NaN	NaN	NaN	NaN	NaN	2956500	1521100	1435400	0	0	0	1538600	891600	646990	1417900	629460	788450
P20962;F5GXR3	P20962;F5GXR3	2;1	2;1	2;1	Parathymosin	PTMS	11.53	102	102;104	0	4.7741	0.83426	1.1372	79.813	NaN	NaN	NaN	NaN	NaN	NaN	NaN	NaN	NaN	12648000	6388900	6259300	0	0	0	3828700	1568000	2260700	8819600	4820900	3998700
P10644-2;P10644;K7EM13;K7EPB2;K7EPR5;K7EQK3;K7EMU2;X6RAV4;K7EMZ6;K7EIE5;K7EID3;K7EJ40;K7EK41	P10644-2;P10644;K7EM13;K7EPB2	3;3;2;2;1;1;1;1;1;1;1;1;1	3;3;2;2;1;1;1;1;1;1;1;1;1	3;3;2;2;1;1;1;1;1;1;1;1;1	cAMP-dependent protein kinase type I-alpha regulatory subunit;cAMP-dependent protein kinase type I-alpha regulatory subunit, N-terminally processed	PRKAR1A	38.002	337	337;381;153;297;45;65;113;124;131;157;167;182;204	0	6.3604	0.77177	1.1388	15.531	0.4405	0.77177	1.0798	0.90345	1.2568	1.1388	7.2551	2.1734	0.029141	9309300	4902900	4406400	1946700	1359400	587290	3060500	1715200	1345300	4302100	1828200	2473900
P13674;P13674-3;P13674-2	P13674;P13674-3;P13674-2	13;12;12	13;12;12	13;12;12	Prolyl 4-hydroxylase subunit alpha-1	P4HA1	61.049	534	534;516;534	0	106.42	0.6678	1.1389	25.079	0.28086	0.66038	1.3491	0.71348	1.0598	1.467	31.683	24.866	13.823	113440000	67726000	45713000	37683000	28988000	8695400	32797000	20194000	12603000	42959000	18544000	24415000
A0A6E1Y6F7;Q9P1Z9	A0A6E1Y6F7;Q9P1Z9	2;2	2;2	2;2	Coiled-coil domain-containing protein 180	CCDC180	192.51	1657	1657;1701	0.002847	1.5305	0.89498	1.1435	33.029	NaN	NaN	NaN	NaN	NaN	NaN	NaN	NaN	NaN	35404000	17045000	18359000	0	0	0	15068000	7174300	7894100	20335000	9870600	10465000
A0A087X2D8;O60271-9;O60271-4;O60271-2;O60271;O60271-5;O60271-3;H0YBE9;H0YBS5	A0A087X2D8;O60271-9;O60271-4;O60271-2;O60271;O60271-5;O60271-3	7;7;7;7;7;5;5;2;1	7;7;7;7;7;5;5;2;1	7;7;7;7;7;5;5;2;1	C-Jun-amino-terminal kinase-interacting protein 4	SPAG9	145.17	1312	1312;1177;1307;1311;1321;931;945;174;250	0	10.071	0.77742	1.1465	13.532	0.396	0.77742	0.72713	0.79772	1.169	0.77703	9.3352	22.267	32.558	7994200	4667800	3326400	2340700	1515300	825390	3879500	2171000	1708400	1774100	981440	792610
P30101;V9GYK6;A0A2R8Y4A6;A0A2R8YFD9;A0A2R8Y7S1;Q8NBS3-5;Q8NBS3;Q8NBS3-1;Q8NBS3-4	P30101	23;1;1;1;1;1;1;1;1	23;1;1;1;1;1;1;1;1	17;1;1;1;1;1;1;1;1	Protein disulfide-isomerase A3	PDIA3	56.782	505	505;574;808;837;852;856;875;891;918	0	323.31	0.74208	1.1466	20.575	0.31732	0.72859	1.1427	0.82723	1.2669	1.1792	18.02	13.758	26.581	583710000	334840000	248880000	141170000	104150000	37025000	186630000	110570000	76053000	255910000	120110000	135800000
F8VS22;Q4V9L6	F8VS22;Q4V9L6	1;1	1;1	1;1	Transmembrane protein 119	TMEM119	14.669	140	140;283	0.006734	1.3469	0.56928	1.1487	107.51	NaN	NaN	NaN	NaN	NaN	NaN	NaN	NaN	NaN	4218400	2362800	1855600	2027000	1484600	542470	2191400	878200	1313200	0	0	0
Q16543;K7EQA9;K7EL68;K7EKQ2;K7EIU0	Q16543;K7EQA9;K7EL68;K7EKQ2	8;5;4;4;2	8;5;4;4;2	8;5;4;4;2	Hsp90 co-chaperone Cdc37;Hsp90 co-chaperone Cdc37, N-terminally processed	CDC37	44.468	378	378;230;184;353;104	0	34.53	0.78192	1.1512	15.814	0.31085	0.7807	1.067	0.73636	1.2556	1.1557	24.225	14.626	19.666	32073000	17797000	14276000	6638100	4439400	2198700	10925000	5824400	5100300	14511000	7533100	6977400
P37837;F2Z393	P37837;F2Z393	7;6	7;6	7;6	Transaldolase	TALDO1	37.54	337	337;318	0	17.747	0.54612	1.1515	27.172	0.52739	0.36998	1.4257	1.4047	0.643	1.4827	28.146	17.493	30.323	77028000	42729000	34298000	18511000	11166000	7345200	25058000	17572000	7486100	33458000	13991000	19467000
P12532;P17540;P12532-2	P12532;P17540;P12532-2	1;1;1	1;1;1	1;1;1	Creatine kinase U-type, mitochondrial;Creatine kinase S-type, mitochondrial	CKMT1A;CKMT2	47.036	417	417;419;448	0.00080386	2.0781	1.0777	1.1531	82.761	NaN	NaN	NaN	NaN	NaN	NaN	NaN	NaN	NaN	2470800	1374900	1095900	476740	410950	65792	776540	381210	395330	1217500	582750	634740
Q9Y5M8;H7C4H2;C9J5Z8	Q9Y5M8;H7C4H2	4;3;1	4;3;1	4;3;1	Signal recognition particle receptor subunit beta	SRPRB	29.702	271	271;160;92	0	37.305	0.8146	1.1532	16.535	0.49727	0.84511	0.91935	1.0808	1.2786	0.99655	17.632	7.2565	17.205	7667300	4260900	3406500	2077100	1472800	604260	3298000	1815600	1482400	2292300	972470	1319800
P68036-2;P68036;P68036-3;A0A1B0GUS4	P68036-2;P68036;P68036-3;A0A1B0GUS4	4;4;4;3	4;4;4;3	4;4;4;3	Ubiquitin-conjugating enzyme E2 L3	UBE2L3	14.121	122	122;154;212;154	0	10.643	1.0587	1.1534	14.162	NaN	NaN	1.0766	NaN	NaN	1.166	NaN	NaN	1.5391	6378600	3545300	2833200	1414300	957420	456890	1750000	1012400	737530	3214300	1575500	1638800
P55036;H0Y3Y9;A6PVX3;Q5VWC4;P55036-2;A2A3N6	P55036;H0Y3Y9;A6PVX3;Q5VWC4;P55036-2;A2A3N6	2;1;1;1;1;1	2;1;1;1;1;1	2;1;1;1;1;1	26S proteasome non-ATPase regulatory subunit 4;Putative PIP5K1A and PSMD4-like protein	PSMD4;PIPSL	40.736	377	377;193;203;380;268;862	0.00080321	2.0724	0.74204	1.1537	26.633	NaN	0.95772	NaN	NaN	1.4747	NaN	NaN	45.616	NaN	5013700	2813800	2199900	1303000	831660	471380	2575700	1289200	1286500	1134900	692970	441950
K7EMC0;Q8TDI0	K7EMC0;Q8TDI0	1;1	1;1	1;1	Chromodomain-helicase-DNA-binding protein 5	CHD5	10.062	90	90;1954	0.0073776	1.3328	1.0815	1.1549	16.465	NaN	NaN	NaN	NaN	NaN	NaN	NaN	NaN	NaN	6270900	3283300	2987700	1355600	778950	576610	1536600	903920	632650	3378800	1600400	1778400
A0A087WVQ6;Q00610-2;Q00610;J3KS13;A0A087WX41;P53675-2;P53675;K7EJJ5;J3KSQ2;J3QL20;J3KRF5;F5H5N6	A0A087WVQ6;Q00610-2;Q00610	31;31;31;10;7;7;7;4;3;2;2;1	31;31;31;10;7;7;7;4;3;2;2;1	31;31;31;10;7;7;7;4;3;2;2;1	Clathrin heavy chain;Clathrin heavy chain 1	CLTC	192.06	1679	1679;1639;1675;612;1260;1583;1640;222;122;97;131;169	0	184.53	0.66755	1.1565	18.836	0.39529	0.58304	1.2444	1.0607	0.99494	1.3316	28.89	23.077	16.847	253060000	143300000	109760000	39623000	28510000	11112000	95139000	61641000	33498000	118300000	53144000	65152000
P23526;P23526-2	P23526;P23526-2	3;2	3;2	3;2	Adenosylhomocysteinase	AHCY	47.716	432	432;404	0	5.9592	0.61405	1.1597	8.7527	0.61405	0.56907	1.5258	1.1611	0.89876	1.6419	8.5834	6.5721	57.925	10028000	5010400	5017600	1369600	807080	562500	2315800	1420900	894890	6342600	2782400	3560200
I3L4N8;P63261;A0A804GS07;A0A6Q8PFE4;I3L3I0;I3L1U9;K7EM38;I3L3R2;J3KT65;Q6S8J3;A5A3E0;P0CG38;F8WCH0;A0A2R8YFE2;Q9BYX7;P0CG39;A0A7P0TBL1	I3L4N8;P63261;A0A804GS07;A0A6Q8PFE4;I3L3I0;I3L1U9	20;20;18;15;11;11;8;8;8;7;6;5;3;3;3;3;2	1;1;1;0;1;1;1;1;1;0;0;0;0;0;0;0;1	1;1;1;0;1;1;1;1;1;0;0;0;0;0;0;0;1	Actin, cytoplasmic 2;Actin, cytoplasmic 2, N-terminally processed	ACTG1	38.975	351	351;375;366;332;214;214;133;164;198;1075;1075;1075;52;79;375;1038;59	0	114.37	0.66563	1.1614	80.116	0.39047	0.61395	2.0117	0.97346	1.0273	2.0679	122.79	29.066	12.119	510240000	259210000	251030000	86117000	61483000	24635000	187000000	121880000	65124000	237120000	75849000	161270000
P56385	P56385	1	1	1	ATP synthase subunit e, mitochondrial	ATP5I	7.9331	69	69	0.0014826	1.6903	0.55797	1.1646	32.356	NaN	NaN	NaN	NaN	NaN	NaN	NaN	NaN	NaN	7255600	4078900	3176700	3660800	1774400	1886500	3594800	2304500	1290300	0	0	0
P26038;V9GZ54	P26038	17;1	17;1	14;1	Moesin	MSN	67.819	577	577;103	0	148.35	0.66664	1.1647	9.7071	0.39226	0.67964	1.2982	0.95526	1.1747	1.3368	15.547	18.625	15.632	298630000	164780000	133860000	78038000	55172000	22866000	103670000	61450000	42222000	116920000	48155000	68768000
Q9UHG3-2;Q9UHG3;C9K055;F8W8W4;C9JGT6;C9JM55	Q9UHG3-2;Q9UHG3;C9K055;F8W8W4;C9JGT6;C9JM55	6;6;4;4;3;3	6;6;4;4;3;3	6;6;4;4;3;3	Prenylcysteine oxidase 1	PCYOX1	48.506	428	428;505;209;293;129;154	0	9.7534	0.7343	1.1655	26.588	0.30205	0.69968	1.1689	0.71675	1.1815	1.1789	12.469	21.708	41.095	49602000	24736000	24866000	6110800	4649900	1460900	15653000	8675000	6978400	27838000	11411000	16427000
P47897-2;P47897;C9J165;A0A0U1RQT0;B4DDN1;A0A1B0GVU9;A0A0U1RRC8;A0A0U1RQJ6;F2Z2V6;A0A0U1RQX5;A0A0U1RR66;A0A0U1RQM8;A0A0U1RQU2;H7C0R3	P47897-2;P47897;C9J165;A0A0U1RQT0;B4DDN1;A0A1B0GVU9	3;3;2;2;2;2;1;1;1;1;1;1;1;1	3;3;2;2;2;2;1;1;1;1;1;1;1;1	3;3;2;2;2;2;1;1;1;1;1;1;1;1	Glutamine--tRNA ligase	QARS	86.578	764	764;775;339;342;630;736;91;96;100;134;173;173;174;253	0	8.558	0.8121	1.1664	33.233	NaN	0.73726	NaN	NaN	1.0459	NaN	NaN	15.428	NaN	1712200	868260	843920	0	0	0	1069000	579300	489680	643200	288960	354240
O95782-2;O95782	O95782-2;O95782	13;13	13;13	10;10	AP-2 complex subunit alpha-1	AP2A1	105.36	955	955;977	0	18.906	0.68779	1.167	21.757	0.52499	0.56067	1.1415	1.4708	0.99184	1.2497	50.398	17.514	9.2678	31997000	18059000	13939000	6537800	4079900	2457900	14476000	8789000	5686700	10984000	5189700	5794100
Q14697;F5H6X6;Q14697-2;E9PKU7;E9PNH1;Q14697-3	Q14697;F5H6X6;Q14697-2;E9PKU7	16;15;15;13;3;1	16;15;15;13;3;1	16;15;15;13;3;1	Neutral alpha-glucosidase AB	GANAB	106.87	944	944;847;966;852;119;52	0	80.106	0.92235	1.1674	27.101	0.31427	0.73349	1.1086	0.74063	1.1252	1.175	37.1	34.672	12.296	104020000	58488000	45528000	22117000	16482000	5634600	19496000	10945000	8550100	62403000	31060000	31343000
C9JA28;Q9UNL2;Q9UNL2-2	C9JA28;Q9UNL2;Q9UNL2-2	1;1;1	1;1;1	1;1;1	Translocon-associated protein subunit gamma	SSR3	20.161	174	174;185;198	0	3.3658	0.98591	1.1677	23.467	NaN	NaN	1.0498	NaN	NaN	1.1036	NaN	NaN	22.418	5155000	2752200	2402800	930030	599840	330190	999890	442520	557370	3225100	1709800	1515300
C9JAW5;C9JNU6;Q9Y241	C9JAW5;C9JNU6;Q9Y241	1;1;1	1;1;1	1;1;1	HIG1 domain family member 1A, mitochondrial	HIGD1A	8.8131	83	83;96;93	0.00081169	2.1533	0.86893	1.1685	15.068	NaN	NaN	NaN	NaN	NaN	NaN	NaN	NaN	NaN	4413900	2182800	2231100	0	0	0	1556000	879910	676110	2857900	1302800	1555000
A0A7P0T937;A0A7P0TAE9;P27824;P27824-2;A0A7P0TB65;A0A7P0T840;A0A7P0T9L0;A0A7P0T8G1;A0A7P0Z484;A0A7P0Z4D6;D6RGY2;P27824-3;A0A7P0TAR9;A0A7P0Z4H2;D6RAQ8;D6RAU8;A0A7P0T8N1;A0A7P0TAN9;D6RFL1;D6RD16	A0A7P0T937;A0A7P0TAE9;P27824;P27824-2;A0A7P0TB65;A0A7P0T840;A0A7P0T9L0;A0A7P0T8G1;A0A7P0Z484;A0A7P0Z4D6;D6RGY2;P27824-3;A0A7P0TAR9	17;17;17;17;16;16;15;15;14;13;13;13;10;7;4;4;4;4;3;1	17;17;17;17;16;16;15;15;14;13;13;13;10;7;4;4;4;4;3;1	17;17;17;17;16;16;15;15;14;13;13;13;10;7;4;4;4;4;3;1	Calnexin	CANX	67.438	591	591;626;592;627;590;600;550;550;520;471;528;484;425;244;107;134;198;210;131;96	0	323.31	0.74794	1.1739	11.64	0.34376	0.72307	1.1987	0.91036	1.1898	1.2518	24.268	17.62	15.116	229660000	122930000	106730000	54306000	38995000	15311000	58816000	32468000	26348000	116540000	51468000	65067000
A0A0G2JP90;A0A087WW46;A0A7I2V3P4;A0A7I2V4T6;A0A7I2V6B0;J3KN36;A0A0G2JN29;A0A087X117;Q5JPE7-3;Q5JPE7-2;Q15155;P69849;Q5JPE7;H3BUC9;A0A087WTD5;A0A7I2V4D7;A0A7I2V2Z5	A0A0G2JP90;A0A087WW46;A0A7I2V3P4;A0A7I2V4T6;A0A7I2V6B0;J3KN36;A0A0G2JN29;A0A087X117;Q5JPE7-3;Q5JPE7-2;Q15155;P69849;Q5JPE7;H3BUC9;A0A087WTD5;A0A7I2V4D7;A0A7I2V2Z5	2;2;2;2;2;2;2;2;2;2;2;2;2;1;1;1;1	2;2;2;2;2;2;2;2;2;2;2;2;2;1;1;1;1	2;2;2;2;2;2;2;2;2;2;2;2;2;1;1;1;1	Nodal modulator 2;Nodal modulator 1;Nodal modulator 3	NOMO1;NOMO3;NOMO2	122.18	1100	1100;1100;1162;1176;1191;1267;1267;1267;1100;1222;1222;1222;1267;144;282;800;1182	0	5.1172	0.82434	1.1741	16.844	NaN	NaN	NaN	NaN	NaN	NaN	NaN	NaN	NaN	2016600	1060600	956010	241420	164640	76780	717030	340920	376110	1058200	555030	503120
H7C579;Q9NQR4	H7C579;Q9NQR4	3;3	3;3	3;3	Omega-amidase NIT2	NIT2	28.633	265	265;276	0	3.3627	1.0805	1.1742	40.16	NaN	0.70138	NaN	NaN	0.89699	NaN	NaN	52.366	NaN	1927700	1036100	891540	0	0	0	818080	481970	336110	1109600	554160	555430
P22695;H3BRG4;H3BUE4;H3BUI9;H3BSJ9	P22695;H3BRG4	3;2;1;1;1	3;2;1;1;1	3;2;1;1;1	Cytochrome b-c1 complex subunit 2, mitochondrial	UQCRC2	48.442	453	453;412;116;132;336	0	23.176	0.72215	1.1771	10.956	0.58295	NaN	NaN	1.0737	NaN	NaN	0.16553	NaN	NaN	3087600	1804900	1282600	1189100	841880	347220	986920	560590	426320	911540	402440	509090
Q07065	Q07065	28	28	28	Cytoskeleton-associated protein 4	CKAP4	66.022	602	602	0	323.31	0.68239	1.1797	35.122	0.39469	0.67119	1.6862	0.97929	1.1456	1.7435	17.658	44.281	26.954	333070000	184420000	148650000	107370000	77049000	30321000	96678000	59164000	37513000	129020000	48209000	80813000
Q9Y3F4;Q9Y3F4-2;H0YH33	Q9Y3F4;Q9Y3F4-2;H0YH33	6;6;3	6;6;3	6;6;3	Serine-threonine kinase receptor-associated protein	STRAP	38.438	350	350;363;95	0	11.995	0.93116	1.1802	4.9522	0.36108	0.70887	1.1855	0.693	1.0402	1.2286	13.42	19.88	16.176	14013000	7366500	6646200	3213800	2308200	905590	4341100	2469600	1871500	6457800	2588700	3869100
P55145;H7C2D6	P55145;H7C2D6	2;1	2;1	2;1	Mesencephalic astrocyte-derived neurotrophic factor	MANF	20.7	182	182;71	0	6.8425	0.70819	1.1803	12.539	0.48322	0.8331	1.1782	1.3428	1.2503	1.2891	30.131	4.5474	0.064316	11614000	6523700	5090000	3995900	2567300	1428600	3357500	1957700	1399700	4260400	1998700	2261700
H3BLU7;O43488	H3BLU7;O43488	1;1	1;1	1;1	Aflatoxin B1 aldehyde reductase member 2	AKR7A2	34.684	314	314;359	0.00079491	2.0109	0.78065	1.181	26.713	NaN	0.78065	NaN	NaN	1.181	NaN	NaN	26.713	NaN	2255000	1370300	884670	0	0	0	2255000	1370300	884670	0	0	0
P41250-2;A0A6Q8PGW4;A0A6Q8PGI6;A0A6Q8PGA8;A0A6Q8PHH9;A0A6Q8PGZ8;P41250;A0A6Q8PHI7;H7C443;A0A6Q8PFZ6	P41250-2;A0A6Q8PGW4;A0A6Q8PGI6;A0A6Q8PGA8;A0A6Q8PHH9;A0A6Q8PGZ8;P41250;A0A6Q8PHI7;H7C443	8;7;7;7;7;7;7;5;4;2	8;7;7;7;7;7;7;5;4;2	8;7;7;7;7;7;7;5;4;2	Glycine--tRNA ligase	GARS	77.53	685	685;616;672;683;705;745;739;606;570;546	0	34.994	0.75821	1.1855	17.542	0.34268	0.74923	1.1822	0.8484	1.227	1.2228	9.0556	16.055	24.364	41043000	24319000	16725000	11566000	8461700	3104400	15627000	9087000	6539900	13850000	6770000	7080200
P22059	P22059	2	2	2	Oxysterol-binding protein 1	OSBP	89.42	807	807	0	2.5413	0.81766	1.1892	24.47	NaN	0.76651	NaN	NaN	1.0994	NaN	NaN	11.092	NaN	1942800	904300	1038500	0	0	0	1568400	852260	716170	374370	52039	322330
P67936;A0A2R8Y5V9;A0A2R8YGX3;A0A2R8YH90;A0A2R8YE05;K7ENT6;A0A5F9UN72;K7EPB9;U3KQK2;A0A590UJB9;A0A590UK79;A0A494BX66;A0A590UJT6;Q2TAC2-2;Q2TAC2	P67936;A0A2R8Y5V9;A0A2R8YGX3;A0A2R8YH90;A0A2R8YE05;K7ENT6;A0A5F9UN72	17;15;13;12;12;12;10;7;5;3;3;1;1;1;1	17;15;13;12;12;12;10;7;5;3;3;1;1;1;1	5;5;5;2;0;0;0;0;0;3;3;0;0;0;0	Tropomyosin alpha-4 chain	TPM4	28.521	248	248;248;183;220;226;245;158;110;111;44;56;916;1027;751;915	0	245.29	0.61566	1.1894	46.881	0.46033	0.52235	1.3428	1.1388	0.99741	1.4079	42.131	50.912	24.983	908350000	515320000	393030000	211640000	116730000	94905000	443990000	295780000	148210000	252730000	102810000	149920000
P15531;P15531-2;E7ERL0;C9K028;E5RHP0	P15531;P15531-2;E7ERL0	6;6;5;2;2	1;1;0;0;0	1;1;0;0;0	Nucleoside diphosphate kinase A	NME1	17.149	152	152;177;139;60;82	0.00082305	2.2112	0.56619	1.1897	0.95106	NaN	NaN	NaN	NaN	NaN	NaN	NaN	NaN	NaN	7760200	5117800	2642400	4045100	3022600	1022500	3715000	2095200	1619900	0	0	0
O95084-2;O95084	O95084-2;O95084	4;4	4;4	4;4	Serine protease 23	PRSS23	39.641	351	351;383	0	15.189	1.0256	1.19	18.715	1.4996	0.78213	1.1155	2.6526	1.1699	1.19	56.038	18.241	25.241	7211000	3825200	3385800	1024200	433680	590560	2189000	1281300	907680	3997700	2110200	1887500
R4GMT0;P61163;A0A1B0GVS3	R4GMT0;P61163;A0A1B0GVS3	5;5;3	5;5;3	4;4;2	Alpha-centractin	ACTR1A	37.433	332	332;376;221	0	23.621	0.69198	1.1906	27.347	0.39787	0.64063	1.3244	0.8901	1.0166	1.401	27.1	21.616	5.7673	36887000	20267000	16620000	9486300	6677100	2809200	10058000	6225900	3832300	17343000	7364100	9978800
Q7KZF4;H7C597	Q7KZF4	14;3	14;3	14;3	Staphylococcal nuclease domain-containing protein 1	SND1	102	910	910;231	0	78.586	0.66306	1.191	10.544	0.44219	0.67085	1.3715	1.0295	1.1176	1.404	20.118	11.651	13.678	101810000	49253000	52561000	15338000	10281000	5056600	33792000	20171000	13621000	52684000	18801000	33883000
A0A7P0TAE1;H0YIV0;A0A7P0TAT8;P14625;A0A7P0T823;A0A7P0T917;A0A087WT78;A0A7P0TAY2;A0A7P0TBC2;A0A7P0T8R3;A0A7P0T885;A0A7P0Z405;Q58FF3;F8W026;A0A7P0TAG4;A0A7P0TAC2;A0A7P0T8C8;A0A7P0Z4B4	A0A7P0TAE1;H0YIV0;A0A7P0TAT8;P14625;A0A7P0T823;A0A7P0T917;A0A087WT78;A0A7P0TAY2;A0A7P0TBC2	28;28;28;28;27;26;26;22;16;5;5;4;4;2;1;1;1;1	28;28;28;28;27;26;26;22;16;5;5;4;4;2;1;1;1;1	27;27;27;27;26;25;25;21;15;4;4;3;4;1;1;1;1;1	Endoplasmin	HSP90B1	90.75	789	789;796;814;803;813;719;751;661;465;251;274;163;399;48;53;55;59;68	0	323.31	0.67543	1.1915	18.397	0.44146	0.66575	1.2992	1.0918	1.1709	1.3319	19.869	26.629	18.335	782530000	442580000	339950000	210890000	146770000	64120000	287710000	171900000	115810000	283930000	123920000	160020000
E9PRY8;P29692;P29692-2;E9PK01;P29692-3;E9PMW7;E9PIZ1;E9PPR1;E9PL12;E9PQ49;E9PI39;H0YCK7;A0A087X1X7;E9PN91;E9PL71;E9PQZ1;P29692-4;E9PKK3;E9PK72;H0YE58;E9PK06	E9PRY8;P29692;P29692-2;E9PK01;P29692-3;E9PMW7;E9PIZ1;E9PPR1;E9PL12;E9PQ49;E9PI39;H0YCK7;A0A087X1X7;E9PN91;E9PL71;E9PQZ1;P29692-4	6;6;6;5;5;4;4;4;4;4;4;4;4;3;3;3;3;1;1;1;1	5;5;5;4;4;4;4;4;4;4;4;4;4;3;3;2;2;1;1;0;1	5;5;5;4;4;4;4;4;4;4;4;4;4;3;3;2;2;1;1;0;1	Elongation factor 1-delta	EEF1D	76.569	697	697;281;647;261;257;130;137;166;168;198;204;210;631;106;187;238;262;39;63;119;139	0	99.523	0.67159	1.1925	7.1523	0.47543	0.65678	1.3052	1.1925	1.1332	1.4172	132.38	11.377	4.8644	60233000	34503000	25730000	12715000	7675300	5039900	22727000	14593000	8133400	24791000	12234000	12557000
Q5VST9-6;A6NGQ3;A0A7P0Z489;Q5VST9-3;Q5VST9;Q5VST9-2;Q5VST9-5;A0A590UJ10	Q5VST9-6;A6NGQ3;A0A7P0Z489;Q5VST9-3;Q5VST9;Q5VST9-2;Q5VST9-5	5;4;4;4;4;4;3;2	5;4;4;4;4;4;3;2	5;4;4;4;4;4;3;2	Obscurin	OBSCN	924.96	8483	8483;8923;8925;6620;7968;7969;3911;3010	0	3.8034	1.0204	1.1931	26.976	NaN	NaN	NaN	NaN	NaN	NaN	NaN	NaN	NaN	8327300	4311400	4015900	1415400	1019700	395650	2985300	1743100	1242200	3926700	1548600	2378100
D6R937;A0A804HJ47;A0A5F9ZHC5;Q12904;Q12904-2	D6R937;A0A804HJ47;A0A5F9ZHC5;Q12904;Q12904-2	1;1;1;1;1	1;1;1;1;1	1;1;1;1;1	Aminoacyl tRNA synthase complex-interacting multifunctional protein 1;Endothelial monocyte-activating polypeptide 2	AIMP1	16.578	150	150;263;273;312;336	0	16.296	1.0112	1.1937	34.614	NaN	NaN	NaN	NaN	NaN	NaN	NaN	NaN	NaN	3428000	1880800	1547200	715750	530160	185590	1214800	710610	504220	1497400	640030	857340
Q9BZF1-3;Q9BZF1-2;Q9BZF1;F8VUA7;F8VQX7	Q9BZF1-3;Q9BZF1-2;Q9BZF1;F8VUA7;F8VQX7	2;2;2;1;1	2;2;2;1;1	2;2;2;1;1	Oxysterol-binding protein-related protein 8;Oxysterol-binding protein	OSBPL8	96.955	847	847;874;889;694;721	0.0027643	1.4253	0.90463	1.1952	16.365	NaN	0.90463	NaN	NaN	1.1952	NaN	NaN	16.365	NaN	699270	347600	351670	0	0	0	699270	347600	351670	0	0	0
P18085;C9JPM4;C9JAK5;U3KQF2;F5H1V1;F5H6T5;F8WDB3	P18085;C9JPM4;C9JAK5;U3KQF2	6;5;5;3;1;1;1	4;3;4;3;0;0;0	4;3;4;3;0;0;0	ADP-ribosylation factor 4	ARF4	20.511	180	180;127;153;71;40;50;59	0	9.2129	0.85058	1.1965	25.085	0.37353	0.76189	1.2465	0.95737	1.2645	1.2858	109.12	36.574	16.805	62152000	34057000	28095000	17607000	12185000	5422300	19053000	10996000	8057200	25492000	10877000	14615000
P26641;P26641-2	P26641;P26641-2	12;11	12;11	12;11	Elongation factor 1-gamma	EEF1G	50.118	437	437;487	0	59.659	0.69497	1.1976	19.477	0.38766	0.70589	1.228	1.0318	1.1812	1.2675	38.173	17.882	27.361	125810000	64122000	61685000	22423000	15492000	6931400	35240000	18990000	16250000	68143000	29640000	38503000
E9PJD9;E9PLL6;P46776	E9PJD9;E9PLL6;P46776	1;1;1	1;1;1	1;1;1	60S ribosomal protein L27a	RPL27A	10.127	91	91;108;148	0	2.2962	1.1375	1.1987	54.927	NaN	NaN	NaN	NaN	NaN	NaN	NaN	NaN	NaN	11076000	6419000	4657000	2592100	2173800	418320	4552900	2726400	1826500	3931000	1518800	2412200
Q96D15;M0QZH0;M0QYB8	Q96D15;M0QZH0	6;5;2	6;5;2	6;5;2	Reticulocalbin-3	RCN3	37.493	328	328;169;150	0	43.461	0.73093	1.2036	12.953	0.39782	0.77298	1.1379	0.8967	1.2347	1.2253	25.929	8.0743	3.7116	48471000	27143000	21328000	17298000	12193000	5105000	12033000	6212100	5821400	19139000	8738000	10401000
P08133;P08133-2;E7EMC6;E5RK69;E5RJF5;E5RK63;E5RI05;E5RFF0;E5RIU8;E5RJR0;H0YC77	P08133;P08133-2;E7EMC6;E5RK69	27;26;16;16;7;7;6;6;4;4;2	27;26;16;16;7;7;6;6;4;4;2	27;26;16;16;7;7;6;6;4;4;2	Annexin A6;Annexin	ANXA6	75.872	673	673;641;330;460;129;150;129;156;95;110;91	0	196.77	0.58159	1.204	22.056	0.46763	0.57562	1.6671	1.2307	0.96949	1.6679	25.065	15.531	17.104	429710000	224320000	205390000	100770000	67096000	33673000	133840000	82009000	51829000	195100000	75216000	119890000
G3V3X4;G3V4P8;P60983	G3V3X4;G3V4P8;P60983	1;1;1	1;1;1	1;1;1	Glia maturation factor beta	GMFB	4.5232	38	38;150;142	0.0089343	1.166	1.0396	1.2045	38.448	NaN	NaN	NaN	NaN	NaN	NaN	NaN	NaN	NaN	6648000	4202800	2445100	1219600	974350	245280	2245300	1505600	739670	3183000	1722800	1460200
Q7L576;A0A0G2JR96;A0A0G2JQT1;Q7L576-2;A0A0G2JQH3;A0A087WVZ5;Q7L576-3	Q7L576;A0A0G2JR96;A0A0G2JQT1;Q7L576-2	3;2;2;2;1;1;1	3;2;2;2;1;1;1	3;2;2;2;1;1;1	Cytoplasmic FMR1-interacting protein 1	CYFIP1	145.18	1253	1253;862;862;822;185;185;447	0	2.5353	0.67863	1.2066	86.801	NaN	0.67863	NaN	NaN	1.2066	NaN	NaN	82.978	NaN	16453000	8818500	7634200	588500	408230	180270	14749000	7811400	6937700	1115000	598830	516220
Q04917;A2IDB2	Q04917;A2IDB2	10;5	7;4	7;4	14-3-3 protein eta	YWHAH	28.218	246	246;162	0	302.32	0.91337	1.2073	25.571	0.26581	0.56127	1.4761	0.78064	0.90091	1.5572	72.404	16.958	25.991	78642000	44250000	34392000	17411000	13028000	4383400	23291000	13872000	9418700	37940000	17350000	20590000
H0YLP6;H0YMF4;H0YKD8;P46779-4;P46779-5;P46779;P46779-2;P46779-3	H0YLP6;H0YMF4;H0YKD8;P46779-4;P46779-5;P46779;P46779-2;P46779-3	2;2;2;2;2;2;2;2	2;2;2;2;2;2;2;2	2;2;2;2;2;2;2;2	60S ribosomal protein L28	RPL28	9.657	89	89;112;170;69;87;137;163;169	0	6.6816	0.792	1.2088	41.271	0.54963	0.85709	NaN	1.459	1.4739	NaN	61.025	28.04	NaN	29425000	15998000	13427000	9390400	5732700	3657700	9525800	4897400	4628400	10509000	5367900	5140800
Q96IU4;B4DQI4;F8W9U3;Q96IU4-2	Q96IU4;B4DQI4;F8W9U3	3;2;2;1	3;2;2;1	3;2;2;1	Alpha/beta hydrolase domain-containing protein 14B	ABHD14B	22.345	210	210;188;208;172	0	6.3215	0.94051	1.2113	3.4834	NaN	0.73862	1.1976	NaN	1.174	1.2497	NaN	6.2654	13.232	8232500	4245200	3987300	0	0	0	3613600	2055900	1557700	4618900	2189200	2429700
C9JLI6;H0YMV8;Q71UM5	C9JLI6;H0YMV8;Q71UM5	1;1;1	1;1;1	1;1;1	40S ribosomal protein S27;40S ribosomal protein S27-like	RPS27L	10.886	97	97;100;84	0.0073925	1.3433	0.59024	1.2153	11.58	NaN	NaN	NaN	NaN	NaN	NaN	NaN	NaN	NaN	14896000	8776800	6118900	5202300	3406200	1796100	4963000	3150600	1812400	4730500	2220000	2510500
Q5T0D2;P30085;P30085-3;A0A494BXC7;P30085-2	Q5T0D2;P30085;P30085-3;A0A494BXC7;P30085-2	2;2;2;1;1	2;2;2;1;1	2;2;2;1;1	UMP-CMP kinase	CMPK1	18.979	169	169;196;228;179;147	0	17.635	0.89329	1.2192	16.736	NaN	0.81963	NaN	NaN	1.3191	NaN	NaN	11.136	NaN	5507000	2734500	2772500	0	0	0	3375400	1674200	1701200	2131600	1060300	1071300
P52597;A0A1B0GW42;H0YBG7;H0YBD7	P52597;A0A1B0GW42;H0YBG7;H0YBD7	2;1;1;1	1;1;0;0	1;1;0;0	Heterogeneous nuclear ribonucleoprotein F;Heterogeneous nuclear ribonucleoprotein F, N-terminally processed	HNRNPF;HNRNPH1	45.671	415	415;98;185;194	0	14.79	0.6962	1.22	18.429	NaN	NaN	NaN	NaN	NaN	NaN	NaN	NaN	NaN	2362300	1385400	976880	1006400	636980	369380	1355900	748430	607510	0	0	0
[truncated: 678 more rows]

## Sheet: Supplementary table 2
Supplementary Table 1 | Shotgun proteomics of proteomes from messenchymal stem cells and non-messenchymal stem cells identified without constraint by enzyme specificity rules during spectrum-to-sequence matching.
[truncated: 1,344 more rows]
